# Supplementary material for: Sequential KOtBu/FeCl3-catalyzed reductive phosphonylation of tertiary amides for the synthesis of α-amino phosphonates and phosphines
Source: Royal Society of Chemistry journal article supplement (doi:10.1039/d3ob00211j), 2023-01-01

*Supporting Information*

**KO<sup>t</sup>Bu and FeCl<sub>3</sub> Sequential Catalyzed Reductive  
Phosphonylation of Tertiary Amides for Synthesis of  $\alpha$   
Amino Phosphonates or Phosphines**

Yue Wang, Xiaoyu Wu, Liqun Yang, Wei Liu, Zhaoguo Zhang and Xiaomin Xie \*

*<sup>†</sup>Shanghai Key Laboratory for Molecular Engineering of Chiral Drugs, School of Chemistry and  
Chemical Engineering, Shanghai Jiao Tong University, 800 Dongchuan Road, Shanghai 200240,  
China*

## Table of Contents

|                                                                          |     |
|--------------------------------------------------------------------------|-----|
| Table of Contents .....                                                  | S2  |
| 1. General Information .....                                             | S3  |
| 2. Optimization of the Reductive Phosphonylation of Tertiary Amides..... | S3  |
| 3. Mechanistic Investigations.....                                       | S3  |
| 4. Reductive Phosphonylation of Tertiary Amides.....                     | S4  |
| 4.1 Experimental Procedures .....                                        | S4  |
| 4.2 Characterization of the Products .....                               | S5  |
| 5. Synthesis and Characterization of Reactants .....                     | S16 |
| 5.1 General Synthesis Procedure for phosphine oxide.....                 | S16 |
| 5.2 Characterization of the Compounds.....                               | S17 |
| 6. References.....                                                       | S18 |
| 7. NMR Spectra Copies .....                                              | S18 |

## 1. General Information

Unless otherwise noted, all reactions were carried out under an atmosphere of nitrogen using standard Schlenk techniques. Materials were purchased from commercial suppliers and used without further purification. Anhydrous cyclohexane and THF was freshly distilled from sodium.  $^1\text{H}$  NMR,  $^{13}\text{C}$  NMR,  $^{19}\text{F}$  NMR and  $^{31}\text{P}$  NMR, spectra were recorded on 400, 500, 600 and 700 MHz spectrometer. The chemical shifts for  $^1\text{H}$  NMR were recorded in ppm downfield from tetramethylsilane (TMS) with the solvent resonance as the internal standard. The chemical shifts for  $^{13}\text{C}$  NMR were recorded in ppm downfield using the central peak of deuteriochloroform (77.16 ppm) as the internal standard. Coupling constants (J) are reported in Hz and refer to apparent peak multiplications. HRMS were obtained on an ESI-TOF mass spectrometer. Flash column chromatography was performed on silica gel (300 – 400 mesh) and basic aluminum oxide (200 – 300 mesh).

## 2. Optimization of the Reductive Phosphonylation of Tertiary Amides

Table S1 Screening of Catalyst and Solvent

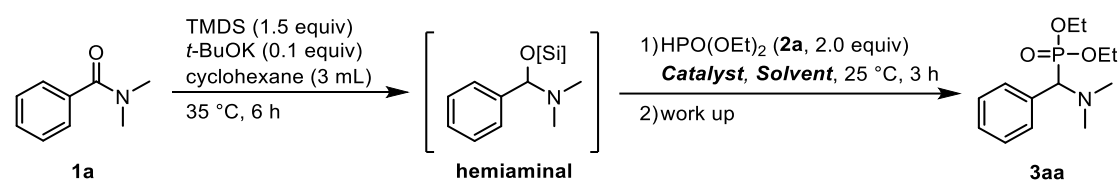

| Entry | Catalyst              | Solvent (°C) | Conv. (%) | Yield (%) |  |
|-------|-----------------------|--------------|-----------|-----------|--|
|       |                       |              |           | lab       |  |
| 1     | Al(OTf) <sub>3</sub>  | Cyclohexane  | >99       | 76        |  |
| 2     | Al(OPri) <sub>3</sub> | Cyclohexane  | >99       | 78        |  |
| 3     | AlBr <sub>3</sub>     | Cyclohexane  | >99       | 82        |  |
| 4     | FeCl <sub>3</sub>     | THF          | >99       | 74        |  |
| 5     | FeCl <sub>3</sub>     | MTBE         | >99       | 84        |  |
| 6     | FeCl <sub>3</sub>     | DCM          | >99       | 80        |  |
| 7     | FeCl <sub>3</sub>     | Toluene      | >99       | 77        |  |
| 8     | FeCl <sub>3</sub>     | DMF          | >99       | 50        |  |

General reaction conditions: **1a** (1.0 mmol, 149.2 mg, 1.0 equiv), *t*-BuOK (0.1 mmol, 11.2 mg, 10 mol%), TMDS (1.5 mmol, 201.5 mg, 1.5 equiv) and cyclohexane (3.0 mL), 35 °C, 6 h. Then added **2a** (2.0 mmol, 220.1 mg, 2.0 equiv), catalyst (20 mol%), solvent (3 mL), 25 °C, 3 h, conversion and yield were determined by GC analysis with 1,2,4,5-tetramethylbenzene as internal standard; reaction was quenched by saturated NaHCO<sub>3</sub> solution.

## 3. Mechanistic Investigations

Figure S1  $^1\text{H}$  NMR Experiments

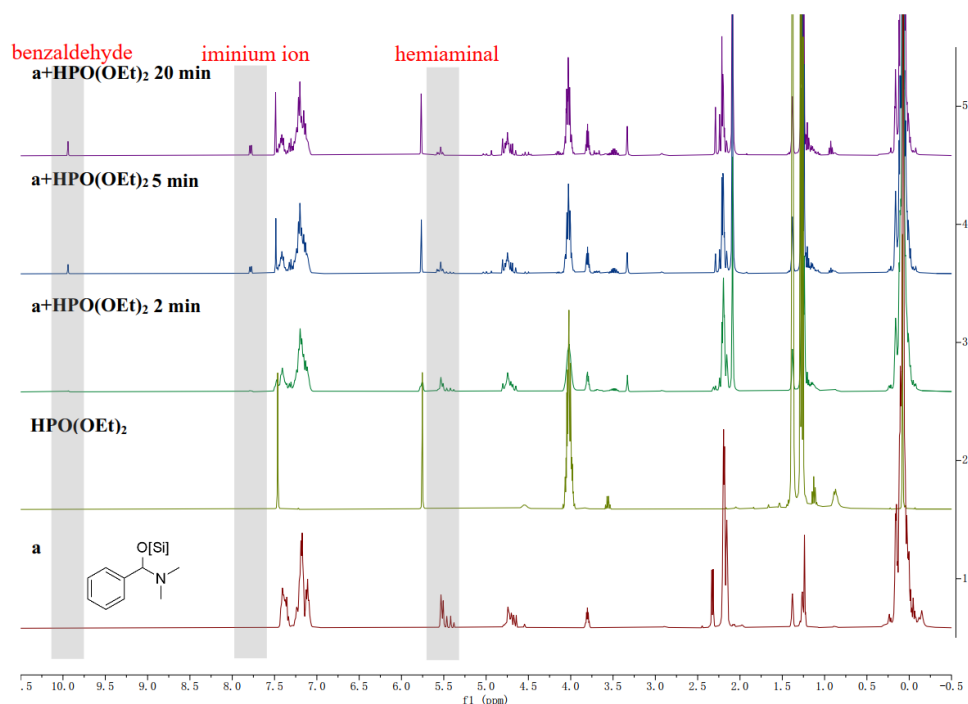

## 4. Reductive Phosphonylation of Tertiary Amides

### 4.1 Experimental Procedures

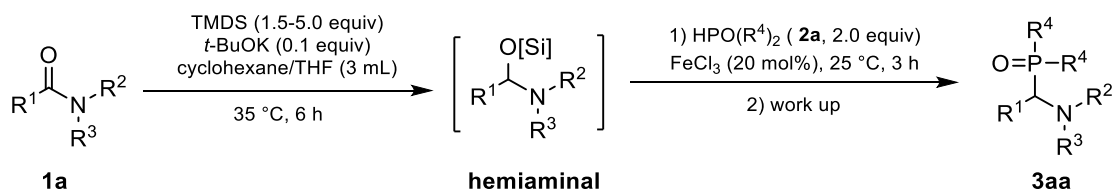

To the mixture of amides **1** (1.0 mmol, 1.0 equiv.) and *t*-BuOK (0.1 mmol, 11.2 mg, 0.1 equiv.) in cyclohexane (3.0 mL) or THF (3.0 mL), was added TMDS (1.5 mmol, 201.5 mg, 0.1 equiv) (the equivalent of TMDS may be adjust on the structure of amides which was shown in Scheme 2) slowly under an atmosphere of nitrogen. The reaction mixture was stirred at 35 °C under an atmosphere of nitrogen. After the amides was consumed completely (detected by TLC), the reaction mixture was cooled to room temperature, and HPOR<sub>2</sub> (**2**, 2.0 mmol, 2.0 equiv) was added and stirred for 15 min at room temperature, and then FeCl<sub>3</sub> (0.2 mmol, 32.4 mg, 0.2 equiv) was added. After the mixture was stirred for 3 h at 25 °C, the reaction mixture was quenched by adding saturated NaHCO<sub>3</sub> solution (2.0 mL). The mixture was filtrated with celite, and the solid was washed with Et<sub>2</sub>O (5.0 mL) and water (10.0 mL) in sequence. The aqueous phase of the filtrate was extracted with Et<sub>2</sub>O (5.0 mL × 3). The combined organic phase was washed with brine and dried over Na<sub>2</sub>SO<sub>4</sub>. After removing the solvent under vacuum, the residue was purified by column chromatography (silica gel or basic aluminum oxide) to give the product **3**.

*Specially: In the case of HPOR<sub>2</sub> as a solid, HPOR<sub>2</sub> was dissolved in DCM (2.0 mL) and then added into the reaction mixture.*

## 4.2 Characterization of the Products

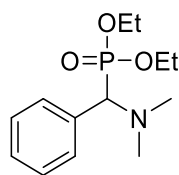

**Diethyl ((dimethylamino)(phenyl)methyl)phosphonate (3aa):** colorless oil, 187 mg, 78% yield. Purification: flash column chromatography (100 – 200 mesh silica gel, DCM : EA = 6 : 1 and 1% Et<sub>3</sub>N); <sup>1</sup>H NMR (400 MHz, CDCl<sub>3</sub>): δ 7.46 – 7.32 (m, 5H), 4.20 – 4.14 (m, 2H), 3.94 – 3.88 (m, 1H), 3.77 (d, *J* = 21.2 Hz, 1H), 3.67 – 3.61 (m, 1H), 2.35 (s, 6H), 1.32 (t, *J* = 6.8 Hz, 3H), 1.03 (t, *J* = 7.2 Hz, 3H); <sup>13</sup>C NMR (100 MHz, CDCl<sub>3</sub>): δ 132.6 (d, *J* = 1.7 Hz), 130.5 (d, *J* = 8.3 Hz), 128.1, 128.0 (d, *J* = 1.7 Hz), 68.3 (d, *J* = 159.8 Hz), 62.4 (d, *J* = 7.2 Hz), 43.8 (d, *J* = 9.5 Hz), 16.4 (d, *J* = 5.7 Hz), 16.1 (d, *J* = 5.6 Hz); <sup>31</sup>P NMR (162 MHz, CDCl<sub>3</sub>): δ 22.8; HRMS – ESI (*m/z*): [M + H]<sup>+</sup> called for C<sub>13</sub>H<sub>23</sub>NO<sub>3</sub>P, 272.1410, found 272.1420.

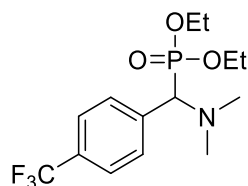

**Diethyl ((dimethylamino)(4-(trifluoromethyl)phenyl)methyl)phosphonate (3ba):** colorless oil, 253 mg, 75% yield. Purification: flash column chromatography (100 – 200 mesh silica gel, DCM : EA = 6 : 1 and 1% Et<sub>3</sub>N); <sup>1</sup>H NMR (400 MHz, CDCl<sub>3</sub>): δ 7.63 – 7.58 (m, 4H), 4.23 – 4.14 (m, 2H), 3.99 – 3.93 (m, 1H), 3.84 (d, *J* = 20.8 Hz, 1H), 3.82 – 3.72 (m, 1H), 2.37 (s, 6H), 1.33 (t, *J* = 6.8 Hz, 3H), 1.09 (t, *J* = 7.2 Hz, 3H); <sup>13</sup>C NMR (125 MHz, CDCl<sub>3</sub>): δ 137.2, 130.8 (d, <sup>3</sup>*J*<sub>C-P</sub> = 8.1 Hz), 130.3 (q, <sup>2</sup>*J*<sub>C-F</sub> = 32.7 Hz), 125.1 (q, <sup>3</sup>*J*<sub>C-F</sub> = 3.7 Hz), 124.2 (q, <sup>1</sup>*J*<sub>C-F</sub> = 270.4 Hz), 68.0 (d, <sup>1</sup>*J*<sub>C-P</sub> = 159.6 Hz), 62.9 (d, <sup>2</sup>*J*<sub>C-P</sub> = 7.0 Hz), 62.5 (d, <sup>2</sup>*J*<sub>C-P</sub> = 7.0 Hz), 43.9 (d, <sup>3</sup>*J*<sub>C-P</sub> = 9.4 Hz), 16.5 (d, <sup>3</sup>*J*<sub>C-P</sub> = 5.7 Hz), 16.2 (d, <sup>3</sup>*J*<sub>C-P</sub> = 5.7 Hz); <sup>31</sup>P NMR (162 MHz, CDCl<sub>3</sub>): δ 21.8; <sup>19</sup>F NMR (376 MHz, CDCl<sub>3</sub>): δ -62.6 (d, *J* = 1.9); HRMS – ESI (*m/z*): [M + Na]<sup>+</sup> called for C<sub>14</sub>H<sub>21</sub>F<sub>3</sub>NO<sub>3</sub>NaP, 362.1103, found 362.1107.

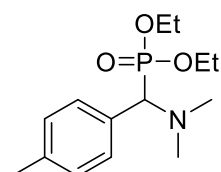

**Diethyl ((dimethylamino)(*p*-tolyl)methyl)phosphonate (3ca):** colorless oil, 220 mg, 77% yield. Purification: flash column chromatography (100 – 200 mesh silica gel, DCM : EA = 6 : 1 and 1% Et<sub>3</sub>N); <sup>1</sup>H NMR (400 MHz, CDCl<sub>3</sub>): δ 7.33 (d, *J* = 7.6 Hz, 2H), 7.15 (d, *J* = 8.0 Hz, 2H), 4.22 – 4.12 (m, 2H), 3.97 – 3.87 (m, 1H), 3.75 (d, *J* = 21.6 Hz, 2H), 3.70 – 3.62 (m, 2H), 2.33 (s, 9H), 1.32 (t, *J* = 7.2 Hz, 3H), 1.05 (t, *J* = 6.8 Hz, 3H); <sup>13</sup>C NMR (100 MHz, CDCl<sub>3</sub>): δ 137.8, 130.6 (d, *J* = 8.5 Hz), 129.4, 128.9, 68.0 (d, *J* = 160.0 Hz), 62.5 (d, *J* = 7.1 Hz), 43.9 (d, *J* = 9.6 Hz), 21.3, 16.6 (d, *J* = 5.5 Hz), 16.3 (d, *J* = 5.6 Hz); <sup>31</sup>P NMR (162 MHz, CDCl<sub>3</sub>): δ 23.0; HRMS – ESI (*m/z*): [M + Na]<sup>+</sup> called for C<sub>14</sub>H<sub>24</sub>NO<sub>3</sub>NaP, 308.1386, found 308.1389.

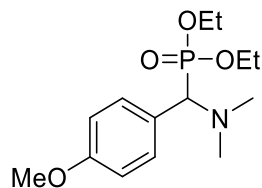

**Diethyl ((dimethylamino)(4-methoxyphenyl)methyl)phosphonate (3da):** colorless oil, 207 mg, 69% yield. Purification: flash column chromatography (100 – 200 mesh silica gel, DCM : EA = 6 : 1 and 1% Et<sub>3</sub>N); <sup>1</sup>H NMR (400 MHz, CDCl<sub>3</sub>): δ 7.39 – 7.36 (m, 2H), 6.89 – 6.87 (m, 2H), 4.20 – 4.14 (m, 2H), 3.95 – 3.89 (m, 1H), 3.77 (s, 3H), 3.74 (d, *J* = 21.6 Hz, 1H), 3.70 – 3.63 (m, 1H), 2.32 (s, 6H), 1.33 (t, *J* = 6.8 Hz, 3H), 1.06 (t, *J* = 7.2 Hz, 3H); <sup>13</sup>C NMR (100 MHz, CDCl<sub>3</sub>): δ 159.4 (d, *J* = 1.7 Hz), 131.8 (d, *J* = 8.5 Hz), 124.2, 113.5, 67.4 (d, *J* = 160.7 Hz), 62.52 (d, *J* = 6.9 Hz), 62.47 (d, *J* = 7.2 Hz), 55.2, 43.7 (d, *J* = 9.3 Hz), 16.5 (d, *J* = 5.7 Hz), 16.3 (d, *J* = 5.5 Hz); <sup>31</sup>P NMR (162 MHz, CDCl<sub>3</sub>): δ 23.1; HRMS – ESI (*m/z*): [*M* + *H*]<sup>+</sup> called for C<sub>14</sub>H<sub>25</sub>NO<sub>4</sub>P, 302.1516, found 302.1516.

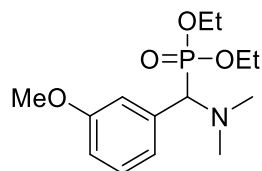

**Diethyl ((dimethylamino)(3-methoxyphenyl)methyl)phosphonate (3ea):** colorless oil, 214 mg, 71% yield. Purification: flash column chromatography (100 – 200 mesh silica gel, DCM : EA = 6 : 1 and 1% Et<sub>3</sub>N); <sup>1</sup>H NMR (400 MHz, CDCl<sub>3</sub>): δ 7.28 – 7.24 (m, 1H), 7.05 – 7.03 (m, 2H), 6.89 – 6.86 (m, 1H), 4.23 – 4.13 (m, 2H), 3.99 – 3.89 (m, 1H), 3.82 (s, 3H), 3.75 (d, *J* = 20.8, 1H), 3.71 – 3.63 (m, 1H), 2.37 (s, 6H), 1.33 (t, *J* = 6.8 Hz, 3H), 1.08 (t, *J* = 7.2 Hz, 3H); <sup>13</sup>C NMR (100 MHz, CDCl<sub>3</sub>): δ 159.4, 134.3, 129.0, 123.0 (d, *J* = 8.4), 115.8 (d, *J* = 8.3), 113.7 (d, *J* = 1.8), 68.6 (d, *J* = 159.5), 62.6 (d, *J* = 7.0), 62.5 (d, *J* = 7.0), 55.4, 44.1 (d, *J* = 9.4), 16.6 (d, *J* = 5.8), 16.4 (d, *J* = 5.5); <sup>31</sup>P NMR (162 MHz, CDCl<sub>3</sub>): δ 22.8; HRMS – ESI (*m/z*): [*M* + *H*]<sup>+</sup> called for C<sub>14</sub>H<sub>25</sub>NO<sub>4</sub>P, 302.1521, found 302.1512.

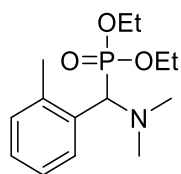

**Diethyl ((dimethylamino)(*o*-tolyl)methyl)phosphonate (3fa):** colorless oil, 203 mg, 75% yield. Purification: flash column chromatography (100 – 200 mesh silica gel, DCM : EA = 6 : 1 and 1% Et<sub>3</sub>N); <sup>1</sup>H NMR (400 MHz, CDCl<sub>3</sub>): δ 7.74 – 7.72 (m, 1H), 7.18 – 7.14 (m, 3H), 4.17 – 4.04 (m, 2H), 3.98 (d, *J* = 19.2 Hz, 1H), 3.84 – 3.77 (m, 1H), 3.45 – 3.38 (m, 2H), 2.37 (s, 6H), 2.34 (s, 3H), 1.30 (t, *J* = 6.8 Hz, 4H), 0.97 (t, *J* = 6.8 Hz, 3H); <sup>13</sup>C NMR (100 MHz, CDCl<sub>3</sub>): δ 137.5 (d, *J* = 9.9 Hz), 133.1, 130.5, 130.2 (d, *J* = 4.2 Hz), 127.8 (d, *J* = 2.4 Hz), 126.0 (d, *J* = 2.4 Hz), 63.8 (d, *J* = 155.6 Hz), 62.8 (d, *J* = 7.0 Hz), 62.0 (d, *J* = 7.5 Hz), 44.6 (d, *J* = 9.4 Hz), 20.3, 16.6 (d, *J* = 6.0 Hz), 16.3 (d, *J* = 5.6 Hz); <sup>31</sup>P NMR (162 MHz, CDCl<sub>3</sub>): δ 23.9; HRMS – ESI (*m/z*): [*M* + *Na*]<sup>+</sup> called for C<sub>14</sub>H<sub>24</sub>NO<sub>3</sub>NaP, 308.1386, found 308.1385.

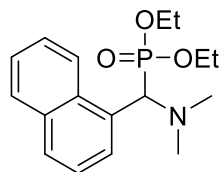

**Diethyl ((dimethylamino)(naphthalen-1-yl)methyl)phosphonate (3ga):** colorless oil, 199 mg, 62% yield. Purification: flash column chromatography (100 – 200 mesh silica gel, DCM : EA = 4 : 1 and 1% Et<sub>3</sub>N); <sup>1</sup>H NMR (400 MHz, CDCl<sub>3</sub>): δ 8.23 (d, *J* = 8.4 Hz, 1H), 8.01 (d, *J* = 7.6 Hz, 1H), 7.88 – 7.82 (m, 2H), 7.56 – 7.46 (m, 3H), 4.67 (d, *J* = 20.4 Hz, 1H), 4.22 – 4.11 (m, 2H), 3.81 – 3.75 (m, 1H), 3.41 – 3.34 (m, 1H), 2.45 (s, 6H), 1.32 (t, *J* = 7.2 Hz, 3H), 0.83 (t, *J* = 7.2 Hz, 3H); <sup>13</sup>C NMR (100 MHz, CDCl<sub>3</sub>): δ 134.0, 132.9 (d, *J* = 9.7 Hz), 129.7, 129.0, 128.9 (d, *J* = 2.2 Hz), 128.8 (d, *J* = 5.7 Hz), 126.5, 125.7, 125.1 (d, *J* = 2.4 Hz), 123.6, 62.8 (d, *J* = 7.1 Hz), 62.4 (d, *J* = 7.3 Hz), 44.4 (d, *J* = 8.7 Hz), 16.5 (d, *J* = 5.8 Hz), 16.1 (d, *J* = 5.5 Hz); <sup>31</sup>P NMR (162 MHz, CDCl<sub>3</sub>): δ 23.7; HRMS – ESI (*m/z*): [M + Na]<sup>+</sup> called for C<sub>17</sub>H<sub>24</sub>NO<sub>3</sub>NaP, 344.1386, found 344.1388.

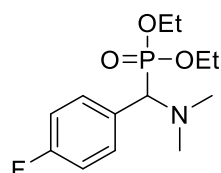

**Diethyl ((dimethylamino)(4-fluorophenyl)methyl)phosphonate (3ha):** colorless oil, 218 mg, 76% yield. Purification: flash column chromatography (100 – 200 mesh silica gel, DCM : EA = 5 : 1 and 1% Et<sub>3</sub>N); <sup>1</sup>H NMR (400 MHz, CDCl<sub>3</sub>): δ 7.47 – 7.43 (m, 2H), 7.07 – 7.03 (m, 2H), 4.23 – 4.14 (m, 2H), 3.96 – 3.90 (m, 1H), 3.78 (d, *J* = 21.6 Hz, 1H), 3.74 – 3.68 (m, 1H), 2.34 (s, 6H), 1.33 (t, *J* = 7.2 Hz, 3H), 1.07 (t, *J* = 6.8 Hz, 3H); <sup>13</sup>C NMR (100 MHz, CDCl<sub>3</sub>): δ 162.7 (d, <sup>1</sup>*J*<sub>C-F</sub> = 247.2 Hz), 132.3 (dd, <sup>3</sup>*J*<sub>C-F</sub> = 8.3 Hz, <sup>3</sup>*J*<sub>C-P</sub> = 8.1 Hz), 128.5 (d, <sup>2</sup>*J*<sub>C-P</sub> = 2.8 Hz), 115.2 (d, <sup>2</sup>*J*<sub>C-F</sub> = 21.1 Hz), 67.4 (d, <sup>1</sup>*J*<sub>C-P</sub> = 160.5 Hz), 62.7 (d, <sup>2</sup>*J*<sub>C-P</sub> = 7.2 Hz), 62.6 (d, <sup>2</sup>*J*<sub>C-P</sub> = 6.9 Hz), 43.8 (d, <sup>3</sup>*J*<sub>C-P</sub> = 9.4 Hz), 16.6 (d, <sup>3</sup>*J*<sub>C-P</sub> = 5.9 Hz), 16.3 (d, <sup>3</sup>*J*<sub>C-P</sub> = 5.6 Hz); <sup>31</sup>P NMR (162 MHz, CDCl<sub>3</sub>): δ 22.5; <sup>19</sup>F NMR (376 MHz, CDCl<sub>3</sub>): δ -114.1; HRMS – ESI (*m/z*): [M + Na]<sup>+</sup> called for C<sub>13</sub>H<sub>21</sub>NO<sub>3</sub>NaP, 312.1135, found 312.1137.

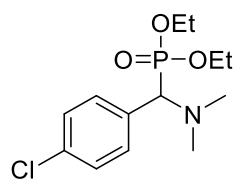

**Diethyl ((dimethylamino)(4-methoxyphenyl)methyl)phosphonate (3ia):** colorless oil, 223 mg, 73% yield. Purification: flash column chromatography (100 – 200 mesh silica gel, DCM : EA = 6 : 1 and 1% Et<sub>3</sub>N); <sup>1</sup>H NMR (400 MHz, CDCl<sub>3</sub>): δ 7.42 – 7.39 (m, 2H), 7.34 – 7.32 (m, 2H), 4.23 – 4.13 (m, 2H), 3.99 – 3.89 (m, 1H), 3.78 – 3.68 (m, 2H), 2.34 (s, 6H), 1.33 (t, *J* = 7.2 Hz, 3H), 1.09 (t, *J* = 6.8 Hz, 3H); <sup>13</sup>C NMR (150 MHz, CDCl<sub>3</sub>): δ 134.1 (d, *J* = 1.9 Hz), 131.9 (d, *J* = 8.2 Hz), 131.4, 128.5, 67.7 (d, *J* = 160.5 Hz), 62.8 (d, *J* = 7.0 Hz), 62.6 (d, *J* = 6.9 Hz), 43.9 (d, *J* = 9.3 Hz), 16.6 (d, *J* = 5.5 Hz), 16.4 (d, *J* = 5.5 Hz); <sup>31</sup>P NMR (162 MHz, CDCl<sub>3</sub>): δ 22.2; HRMS – ESI (*m/z*): [M + H]<sup>+</sup> called for C<sub>13</sub>H<sub>22</sub>NO<sub>3</sub>PCl, 306.1020, found 306.1019.

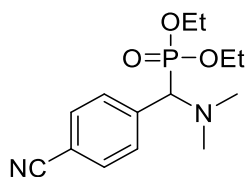

**Diethyl ((4-cyanophenyl)(dimethylamino)methyl)phosphonate (3ja):** colorless oil, 173 mg, 59% yield. Purification: flash column chromatography (100 – 200 mesh silica gel, DCM : EA = 6 : 1 and 1% Et<sub>3</sub>N); <sup>1</sup>H NMR (400 MHz, CDCl<sub>3</sub>): δ 7.66 – 7.64 (m, 2H), 7.60 – 7.58 (m, 2H), 4.21 – 4.14 (m, 2H), 3.98 – 3.91 (m, 1H), 3.83 – 3.73 (m, 2H), 2.35 (s, 6H), 1.32 (t, *J* = 6.8 Hz, 3H), 1.10 (t, *J* = 7.2 Hz, 3H). <sup>13</sup>C NMR (100 MHz, CDCl<sub>3</sub>): δ 139.1, 132.0, 131.1 (d, *J* = 8.0 Hz), 118.7, 112.0 (d, *J* = 1.8 Hz), 68.2 (d, *J* = 159.1 Hz), 62.9 (d, *J* = 7.1 Hz), 62.4 (d, *J* = 7.0 Hz), 43.9 (d, *J* = 9.2 Hz), 16.4 (d, *J* = 5.8 Hz), 16.2 (d, *J* = 5.5 Hz); <sup>31</sup>P NMR (162 MHz, CDCl<sub>3</sub>): δ 21.3; HRMS – ESI (*m/z*): [M + H]<sup>+</sup> called for C<sub>14</sub>H<sub>22</sub>N<sub>2</sub>O<sub>3</sub>P, 297.1363, found 297.1359.

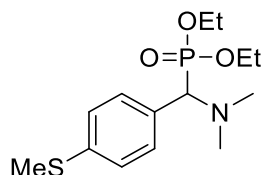

**Diethyl ((dimethylamino)(4-(methylthio)phenyl)methyl)phosphonate (3ka):** colorless oil, 210 mg, 59% yield. Purification: flash column chromatography (100 – 200 mesh silica gel, DCM : EA = 8 : 1 and 1% Et<sub>3</sub>N); <sup>1</sup>H NMR (400 MHz, CDCl<sub>3</sub>): δ 7.37 (d, *J* = 7.2 Hz, 2H), 7.21 (d, *J* = 8.0 Hz, 2H), 4.22 – 4.12 (m, 2H), 3.97 – 3.88 (m, 1H), 3.76 – 3.65 (m, 2H), 2.47 (s, 3H), 2.33 (s, 6H), 1.32 (t, *J* = 7.2 Hz, 3H), 1.06 (t, *J* = 6.8 Hz, 3H); <sup>13</sup>C NMR (100 MHz, CDCl<sub>3</sub>): δ 138.5, 131.1, 131.0, 126.0, 67.8 (d, *J* = 160.2 Hz), 62.6 (t, *J* = 7.2 Hz), 43.9 (d, *J* = 9.3 Hz), 16.6 (d, *J* = 5.6 Hz), 16.4 (d, *J* = 5.6 Hz), 15.7; <sup>31</sup>P NMR (162 MHz, CDCl<sub>3</sub>): δ 22.6; HRMS – ESI (*m/z*): [M + H]<sup>+</sup> called for C<sub>14</sub>H<sub>25</sub>NO<sub>3</sub>SP, 318.1287, found 318.1284.

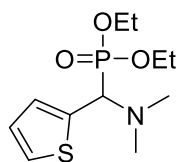

**Diethyl ((dimethylamino)(thiophen-2-yl)methyl)phosphonate (3la):** colorless oil, 160 mg, 58% yield. Purification: flash column chromatography (100 – 200 mesh silica gel, DCM : EA = 3.5 : 1 and 1% Et<sub>3</sub>N). <sup>1</sup>H NMR (400 MHz, CDCl<sub>3</sub>): δ 7.29 (d, *J* = 5.2 Hz, 1H), 7.22 – 7.20 (m, 1H), 7.05 – 7.02 (m, 1H), 4.25 – 4.14 (m, 3H), 4.06 – 3.96 (m, 1H), 3.89 – 3.79 (m, 1H), 2.38 (s, 6H), 1.34 (t, *J* = 7.2 Hz, 3H), 1.12 (t, *J* = 7.2 Hz, 3H); <sup>13</sup>C NMR (100 MHz, CDCl<sub>3</sub>): δ 132.9 (d, *J* = 6.6 Hz), 129.2 (d, *J* = 6.8 Hz), 127.0, 125.9 (d, *J* = 2.0 Hz, 1H), 63.1 (d, *J* = 7.6 Hz), 62.7 (d, *J* = 7.1 Hz), 62.3 (d, *J* = 165.1 Hz), 43.3 (d, *J* = 8.7 Hz), 16.6 (d, *J* = 5.5 Hz), 16.4 (d, *J* = 5.5 Hz); <sup>31</sup>P NMR (162 MHz, CDCl<sub>3</sub>): δ 21.2; HRMS – ESI (*m/z*): [M + H]<sup>+</sup> called for C<sub>11</sub>H<sub>21</sub>NO<sub>3</sub>PS, 278.0974, found 278.0974.



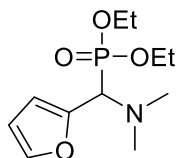

**Diethyl ((dimethylamino)(furan-2-yl)methyl)phosphonate (3ma):** yellow oil, 144 mg, 55% yield. Purification: flash column chromatography (100 – 200 mesh silica gel, DCM : EA = 3.5 : 1 and 1% Et<sub>3</sub>N); <sup>1</sup>H NMR (400 MHz, CDCl<sub>3</sub>): δ 7.42 (s, 1H), 6.49 (s, 1H), 6.37 (s, 1H), 4.23 – 4.16 (m, 2H), 4.08 – 4.01 (m, 2H), 3.98 – 3.89 (m, 1H), 2.35 (s, 6H), 1.33 (t, *J* = 7.6 Hz, 3H), 1.16 (t, *J* = 7.6 Hz, 3H); <sup>13</sup>C NMR (100 MHz, CDCl<sub>3</sub>): δ 147.1 (d, *J* = 10.2), 142.8 (d, *J* = 1.9), 111.5 (d, *J* = 4.5), 110.5, 63.0 (d, *J* = 6.9), 62.6 (d, *J* = 6.8), 60.9 (d, *J* = 166.5), 43.6 (d, *J* = 8.9), 16.6 (d, *J* = 5.6), 16.4 (d, *J* = 5.5); <sup>31</sup>P NMR (162 MHz, CDCl<sub>3</sub>): δ 20.5; HRMS – ESI (m/z): [M + Na]<sup>+</sup> called for C<sub>11</sub>H<sub>20</sub>NO<sub>4</sub>NaP, 248.1022, found 248.1024.

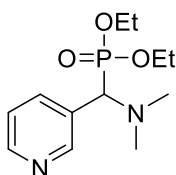

**Diethyl ((dimethylamino)(pyridin-3-yl)methyl)phosphonate (3na):** yellow oil, 106 mg, 39% yield. Purification: flash column chromatography (100 – 200 mesh silica gel, DCM : CH<sub>3</sub>OH = 20 : 1 and 1% Et<sub>3</sub>N); <sup>1</sup>H NMR (400 MHz, CDCl<sub>3</sub>): δ 8.57 – 8.56 (m, 2H), 7.95 (d, *J* = 8.0 Hz, 1H), 7.33 – 7.30 (m, 1H), 4.25 – 4.15 (m, 2H), 4.01 – 3.91 (m, 1H), 3.86 – 3.75 (m, 2H), 2.36 (s, 6H), 1.33 (t, *J* = 6.8 Hz, 3H), 1.09 (t, *J* = 7.2 Hz, 3H); <sup>13</sup>C NMR (175 MHz, CDCl<sub>3</sub>): δ 151.5 (d, *J* = 11.1 Hz), 149.5, 137.8 (d, *J* = 6.0 Hz), 128.8, 123.2, 65.6 (d, *J* = 161.7 Hz), 63.0 (d, *J* = 7.0 Hz), 62.5 (d, *J* = 7.0 Hz), 43.8 (d, *J* = 8.9 Hz), 16.6 (d, *J* = 5.8 Hz), 16.4 (d, *J* = 5.4 Hz); <sup>31</sup>P NMR (162 MHz, CDCl<sub>3</sub>): δ 21.7; HRMS – ESI (m/z): [M + Na]<sup>+</sup> called for C<sub>12</sub>H<sub>21</sub>N<sub>2</sub>O<sub>3</sub>NaP, 295.1182, found 295.1182.

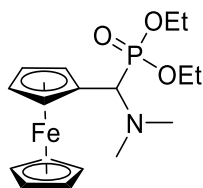

**Diethyl ((dimethylamino)(ferrocenyl)methyl)phosphonate (3oa):** red oil, 250 mg, 58% yield. Purification: flash column chromatography (100 – 200 mesh silica gel, DCM : EA = 6 : 1 and 1% Et<sub>3</sub>N); <sup>1</sup>H NMR (400 MHz, CDCl<sub>3</sub>): δ 4.44 (s, 1H), 4.21 – 4.12 (m, 12H), 3.90 (d, *J* = 22.4 Hz, 1H), 2.27 (s, 6H), 1.40 – 1.32 (m, 6H); <sup>13</sup>C NMR (100 MHz, CDCl<sub>3</sub>): δ 69.6 (d, *J* = 1.8 Hz), 69.3, 68.7 (d, *J* = 16.3 Hz), 67.7, 67.5, 63.0 (d, *J* = 7.3 Hz), 62.8 (d, *J* = 158.5 Hz), 61.4 (d, *J* = 7.5 Hz), 43.1 (d, *J* = 7.0 Hz), 16.7 (d, *J* = 5.7 Hz), 16.6 (d, *J* = 5.8 Hz); <sup>31</sup>P NMR (162 MHz, CDCl<sub>3</sub>): δ 23.2; HRMS – ESI (m/z): [M + Na]<sup>+</sup> called for C<sub>17</sub>H<sub>26</sub>NO<sub>3</sub>NaPFe, 402.0892, found 402.0893.

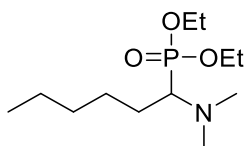

**Diethyl (1-(dimethylamino)hexyl)phosphonate (3pa):** colorless oil, 204 mg, 77% yield. Purification:

flash column chromatography (100 – 200 mesh silica gel, DCM : EA = 6 : 1 and 1% Et<sub>3</sub>N); <sup>1</sup>H NMR (500 MHz, CDCl<sub>3</sub>): δ 4.13 – 4.07 (m, 4H), 2.83 – 2.75 (m, 1H), 2.455 (s, 3H), 2.450 (s, 3H), 1.68 – 1.60 (m, 2H), 1.49 – 1.45 (m, 1H), 1.35 – 1.24 (m, 11H), 0.87 (t, *J* = 8.5 Hz, 3H); <sup>13</sup>C NMR (126 MHz, CDCl<sub>3</sub>): δ 62.1 (d, *J* = 137.0 Hz), 61.7 (d, *J* = 8.6 Hz), 61.1 (d, *J* = 7.6 Hz), 42.3 (d, *J* = 4.2 Hz), 31.8, 27.3 (d, *J* = 11.8 Hz), 26.9 (d, *J* = 5.7 Hz), 22.6, 16.71, 16.70 (d, *J* = 12.0 Hz), 14.1; <sup>31</sup>P NMR (202 MHz, CDCl<sub>3</sub>): δ 29.8; HRMS – ESI (m/z): [M + Na]<sup>+</sup> called for C<sub>12</sub>H<sub>28</sub>NO<sub>3</sub>NaP, 288.1699, found 288.1701.

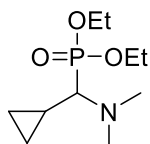

**Diethyl (cyclopropyl(dimethylamino)methyl)phosphonate (3qa)**: colorless oil, 182 mg, 77% yield. Purification: flash column chromatography (100 – 200 mesh silica gel, DCM : CH<sub>3</sub>OH = 20 : 1 and 1% Et<sub>3</sub>N); <sup>1</sup>H NMR (400 MHz, CDCl<sub>3</sub>): δ 4.18 – 4.11 (m, 4H), 2.52 (s, 6H), 2.04 (dd, *J* = 18.8, 10.8 Hz, 1H), 1.32 (t, *J* = 6.8, 6H), 1.16 – 1.05 (m, 1H), 0.69 – 0.60 (m, 2H), 0.36 – 0.34 (m, 2H); <sup>13</sup>C NMR (100 MHz, CDCl<sub>3</sub>): δ 67.6 (d, *J* = 149.9 Hz), 62.0 (d, *J* = 7.2 Hz), 61.3 (d, *J* = 7.2 Hz), 43.1 (d, *J* = 6.8 Hz), 16.6 (d, *J* = 2.3 Hz), 16.5 (d, *J* = 2.4 Hz), 6.9 (d, *J* = 6.9 Hz), 5.5 (d, *J* = 16.2 Hz), 3.4; <sup>31</sup>P NMR (162 MHz, CDCl<sub>3</sub>): δ 26.0; HRMS – ESI (m/z): [M + Na]<sup>+</sup> called for C<sub>10</sub>H<sub>22</sub>NO<sub>3</sub>NaP, 258.1230, found 258.1231.

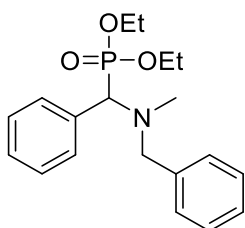

**Diethyl ((benzyl(methyl)amino)(phenyl)methyl)phosphonate (3ra)**<sup>1</sup>: colorless oil, 259 mg, 75% yield. Purification: flash column chromatography (100 – 200 mesh silica gel, PE : DCM : EA = 5 : 1 : 1 and 1% Et<sub>3</sub>N); <sup>1</sup>H NMR (400 MHz, CDCl<sub>3</sub>): δ 7.50 – 7.48 (m, 2H), 7.39 – 7.23 (m, 8H), 4.30 – 4.16 (m, 2H), 4.05 (d, *J* = 24.0 Hz, 1H), 3.94 – 3.88 (m, 1H), 3.84 (d, *J* = 13.2 Hz, 1H), 3.75 – 3.65 (m, 1H), 3.39 (d, *J* = 13.2 Hz, 1H), 2.41 (s, 3H), 1.37 (t, *J* = 6.8 Hz, 3H), 1.02 (t, *J* = 7.2 Hz, 3H); <sup>13</sup>C NMR (100 MHz, CDCl<sub>3</sub>): δ 139.1, 132.1 (d, *J* = 4.2 Hz), 130.9 (d, *J* = 8.6 Hz), 129.0, 128.4, 128.2, 128.1 (d, *J* = 1.4 Hz), 127.2, 65.0 (d, *J* = 160.9 Hz), 62.7 (d, *J* = 7.1 Hz), 62.3 (d, *J* = 7.0 Hz), 59.9 (d, *J* = 12.5 Hz), 40.0 (d, *J* = 5.2 Hz), 16.7 (d, *J* = 6.1 Hz), 16.3 (d, *J* = 5.6 Hz); <sup>31</sup>P NMR (162 MHz, CDCl<sub>3</sub>): δ 23.1.

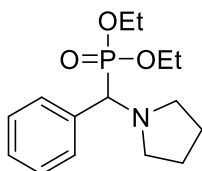

**Diethyl (phenyl(pyrrolidin-1-yl)methyl)phosphonate (3sa)**<sup>2</sup>: colorless oil, 166 mg, 56% yield. Purification: flash column chromatography (100 – 200 mesh silica gel, DCM : EA = 6 : 1 and 1% Et<sub>3</sub>N). <sup>1</sup>H NMR (400 MHz, CDCl<sub>3</sub>): δ 7.49 – 7.46 (m, 2H), 7.35 – 7.28 (m, 3H), 4.16 – 4.03 (m, 2H), 3.95 – 3.85 (m, 1H), 3.76 (d, *J* = 15.6 Hz, 1H), 3.64 – 3.54 (m, 1H), 2.68 – 2.62 (m, 4H), 1.77– 1.70 (m, 4H), 1.29 (t, *J* = 6.4 Hz, 3H), 1.06 (t, *J* = 6.8 Hz, 3H); <sup>13</sup>C NMR (100 MHz, CDCl<sub>3</sub>): δ 135.2, 130.0 (d, *J* = 7.3 Hz), 128.2 (d, *J* = 1.7 Hz), 127.9 (d, *J* = 2.5 Hz), 67.6 (d, *J* = 157.2 Hz), 62.7 (d, *J* = 7.0 Hz), 62.1 (d, *J*

= 7.4 Hz), 53.0 (d,  $J = 8.8$  Hz), 23.3, 16.4 (d,  $J = 5.8$  Hz), 16.2 (d,  $J = 5.7$  Hz);  $^{31}\text{P}$  NMR (162 MHz,  $\text{CDCl}_3$ ):  $\delta$  22.9.

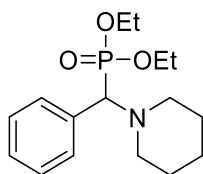

**Diethyl (phenyl(piperidin-1-yl)methyl)phosphonate (3ta)**<sup>1</sup>: colorless oil, 220 mg, 71% yield. Purification: flash column chromatography (100 – 200 mesh silica gel, PE : DCM : EA = 3.5 : 1 : 1 and 1%  $\text{Et}_3\text{N}$ );  $^1\text{H}$  NMR (400 MHz,  $\text{CDCl}_3$ ):  $\delta$  7.47 – 7.44 (m, 2H), 7.35 – 7.29 (m, 3H), 4.33 – 4.17 (m, 2H), 3.96 – 3.84 (m, 2H), 3.77 – 3.67 (m, 1H), 2.83 – 2.77 (m, 2H), 2.40 – 2.34 (m, 2H), 1.58 – 1.51 (m, 4H), 1.35 (t,  $J = 6.8$  Hz, 3H), 1.31 – 1.27 (m, 2H), 1.03 (t,  $J = 6.8$  Hz, 3H);  $^{13}\text{C}$  NMR (100 MHz,  $\text{CDCl}_3$ ):  $\delta$  132.6 (d,  $J = 3.5$  Hz), 130.6 (d,  $J = 9.1$  Hz), 128.0, 127.9 (d,  $J = 1.4$  Hz), 68.9 (d,  $J = 160.8$  Hz), 63.2 (d,  $J = 7.0$  Hz), 62.1 (d,  $J = 6.9$  Hz), 52.6 (d,  $J = 9.1$  Hz), 26.5, 24.1, 16.6 (d,  $J = 5.9$  Hz), 16.2 (d,  $J = 5.7$  Hz);  $^{31}\text{P}$  NMR (162 MHz,  $\text{CDCl}_3$ ):  $\delta$  22.4.

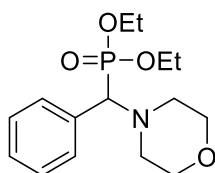

**Diethyl (morpholino(phenyl)methyl)phosphonate (3ua)**<sup>1</sup>: colorless oil, 247 mg, 73% yield. Purification: flash column chromatography (100 – 200 mesh silica gel, DCM : EA = 5 : 1 and 1%  $\text{Et}_3\text{N}$ ).  $^1\text{H}$  NMR (400 MHz,  $\text{CDCl}_3$ ):  $\delta$  7.46 – 7.43 (m, 2H), 7.36 – 7.28 (m, 3H), 4.26 – 4.14 (m, 2H), 3.93 – 3.87 (m, 1H), 3.80 (d,  $J = 21.2$  Hz, 1H), 3.70 – 3.60 (m, 5H), 2.82 – 2.77 (m, 2H), 2.54 – 2.50 (m, 2H), 1.33 (t,  $J = 7.2$  Hz, 3H), 1.03 (t,  $J = 6.8$  Hz, 3H);  $^{13}\text{C}$  NMR (100 MHz,  $\text{CDCl}_3$ ):  $\delta$  132.5, 130.6 (d,  $J = 8.4$  Hz), 128.4, 128.3 (d,  $J = 1.7$  Hz), 68.7 (d,  $J = 159.9$  Hz), 67.3, 63.0 (d,  $J = 7.1$  Hz), 62.5 (d,  $J = 7.1$  Hz), 52.0 (d,  $J = 9.2$  Hz), 16.7 (d,  $J = 5.9$  Hz), 16.3 (d,  $J = 5.6$  Hz);  $^{31}\text{P}$  NMR (162 MHz,  $\text{CDCl}_3$ ):  $\delta$  21.8.

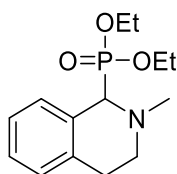

**Diethyl (2-methyl-1,2,3,4-tetrahydroisoquinolin-1-yl)phosphonate (3va)**: pale yellow oil, 220 mg, 78% yield. Purification: flash column chromatography (100 – 200 mesh silica gel, PE : DCM : EA = 1 : 1 : 1 and 1%  $\text{Et}_3\text{N}$ );  $^1\text{H}$  NMR (400 MHz,  $\text{CDCl}_3$ ):  $\delta$  7.34 – 7.31 (m, 1H), 7.17 – 7.14 (m, 2H), 7.11 – 7.09 (m, 1H), 4.09 – 3.88 (m, 5H), 3.45 – 3.39 (m, 1H), 2.86 – 2.81 (m, 2H), 2.66 – 2.61 (m, 4H), 1.27 (t,  $J = 7.2$  Hz, 3H), 1.19 (t,  $J = 7.2$  Hz, 3H);  $^{13}\text{C}$  NMR (100 MHz,  $\text{CDCl}_3$ ):  $\delta$  136.4 (d,  $J = 6.2$  Hz), 129.8 (d,  $J = 3.5$  Hz), 129.1 (d,  $J = 4.7$  Hz), 128.5 (d,  $J = 3.4$  Hz), 126.9 (d,  $J = 4.3$  Hz), 125.7 (d,  $J = 3.8$  Hz), 62.9 (d,  $J = 7.7$  Hz), 62.6 (d,  $J = 161.8$  Hz), 62.5 (d,  $J = 7.9$  Hz), 49.4 (d,  $J = 5.0$  Hz), 45.0 (d,  $J = 9.7$  Hz), 26.9, 16.5 (d,  $J = 4.1$  Hz), 16.4 (d,  $J = 3.9$  Hz);  $^{31}\text{P}$  NMR (162 MHz,  $\text{CDCl}_3$ ):  $\delta$  23.1; HRMS – ESI (m/z):  $[\text{M} + \text{Na}]^+$  called for  $\text{C}_{14}\text{H}_{22}\text{NO}_3\text{NaP}$ , 306.1230, found 306.1228.

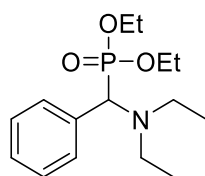

**Diethyl ((diethylamino)(phenyl)methyl)phosphonate (3wa)**<sup>3</sup>: colorless oil, 142 mg, 47% yield. Purification: flash column chromatography (100 – 200 mesh silica gel, PE : DCM : EA = 8 : 1 : 1 and 1% Et<sub>3</sub>N); <sup>1</sup>H NMR (400 MHz, CDCl<sub>3</sub>): δ 7.47 – 7.45 (m, 2H), 7.34 – 7.27 (m, 3H), 4.27 – 4.19 (m, 2H), 4.16 (d, *J* = 24.8 Hz, 1H), 3.97 – 3.87 (m, 1H), 3.79 – 3.69 (m, 1H), 3.03 – 2.94 (m, 2H), 2.34 – 2.26 (m, 2H), 1.33 (t, *J* = 7.2 Hz, 3H), 1.04 (t, *J* = 6.8 Hz, 9H); <sup>13</sup>C NMR (100 MHz, CDCl<sub>3</sub>): δ 133.6 (d, *J* = 5.1 Hz), 130.7 (d, *J* = 8.9 Hz), 128.1, 127.8 (d, *J* = 1.4 Hz), 63.2 (d, *J* = 6.9 Hz), 62.2 (d, *J* = 162.1 Hz), 62.0 (d, *J* = 7.2 Hz), 44.9 (d, *J* = 8.4 Hz), 16.6 (d, *J* = 6.0 Hz), 16.3 (d, *J* = 5.7 Hz), 13.4; <sup>31</sup>P NMR (162 MHz, CDCl<sub>3</sub>): δ 23.6.

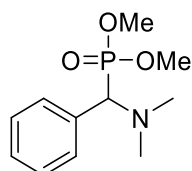

**Dimethyl ((dimethylamino)(phenyl)methyl)phosphonate (3ab)**<sup>4</sup>: colorless oil, 187 mg, 78% yield. Purification: flash column chromatography (100 – 200 mesh silica gel, DCM : EA = 3.5 : 1 and 1% Et<sub>3</sub>N). <sup>1</sup>H NMR (400 MHz, CDCl<sub>3</sub>): δ 7.47 – 7.44 (m, 2H), 7.38 – 7.32 (m, 3H), 3.82 (d, *J* = 22.0 Hz, 1H), 3.81 (d, *J* = 10.8 Hz, 3H), 3.44 (d, *J* = 10.4 Hz, 3H), 2.35 (s, 6H); <sup>13</sup>C NMR (100 MHz, CDCl<sub>3</sub>): δ 132.1, 130.7 (d, *J* = 8.6 Hz), 128.4, 128.3 (d, *J* = 1.6 Hz), 68.0 (d, *J* = 160.6 Hz), 53.3 (d, *J* = 7.2 Hz), 43.8 (d, *J* = 9.7 Hz); <sup>31</sup>P NMR (162 MHz, CDCl<sub>3</sub>): δ 25.0.

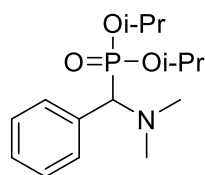

**Diisopropyl ((dimethylamino)(phenyl)methyl)phosphonate (3ac)**: colorless oil, 212 mg, 71% yield. Purification: flash column chromatography (100 – 200 mesh silica gel, DCM : EA = 6 : 1 and 1% Et<sub>3</sub>N); <sup>1</sup>H NMR (400 MHz, CDCl<sub>3</sub>): δ 7.44 – 7.41 (m, 2H), 7.33 – 7.27 (m, 3H), 4.79 – 4.71 (m, 1H), 4.46 – 4.38 (m, 1H), 3.70 (d, *J* = 22.0 Hz, 1H), 2.32 (s, 6H), 1.32 – 1.29 (m, 6H), 1.17 (d, *J* = 6.0 Hz, 3H), 0.79 (d, *J* = 6.4 Hz, 3H); <sup>13</sup>C NMR (100 MHz, CDCl<sub>3</sub>): δ 132.9 (d, *J* = 2.4 Hz), 130.7 (d, *J* = 8.6 Hz), 128.0, 127.9 (d, *J* = 1.5 Hz), 71.0 (d, *J* = 7.2 Hz), 70.9 (d, *J* = 7.2 Hz), 68.6 (d, *J* = 161.8 Hz), 43.9 (d, *J* = 9.5 Hz), 24.4 (d, *J* = 2.5 Hz), 24.3 (d, *J* = 3.1 Hz), 23.9 (d, *J* = 5.3 Hz), 23.1 (d, *J* = 5.9 Hz); <sup>31</sup>P NMR (162 MHz, CDCl<sub>3</sub>): δ 21.2; HRMS – ESI (m/z): [M + Na]<sup>+</sup> called for C<sub>15</sub>H<sub>26</sub>NO<sub>3</sub>NaP, 322.1543, found 322.1540.

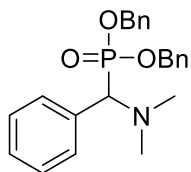

**Dibenzyl ((dimethylamino)(phenyl)methyl)phosphonate (3ad):** pale yellow oil, 289 mg, 73% yield. Purification: flash column chromatography (100 – 200 mesh silica gel, PE : DCM : EA = 4 : 1 : 1 and 1% Et<sub>3</sub>N); <sup>1</sup>H NMR (400 MHz, CDCl<sub>3</sub>): δ 7.48 – 7.45 (m, 2H), 7.36 – 7.31 (m, 8H), 7.23 – 7.20 (m, 3H), 7.04 – 7.01 (m, 2H), 5.18 – 5.06 (m, 2H), 4.85 – 4.80 (m, 1H), 4.56 – 4.51 (m, 1H), 3.88 (d, *J* = 21.6 Hz, 1H), 2.37 (s, 6H); <sup>13</sup>C NMR (100 MHz, CDCl<sub>3</sub>): δ 136.7 (d, *J* = 6.1 Hz), 136.3 (d, *J* = 6.1 Hz), 132.3 (d, *J* = 1.8 Hz), 130.6 (d, *J* = 8.6 Hz), 128.5, 128.34, 128.26, 128.21, 128.15 (d, *J* = 1.7 Hz), 128.1, 127.9, 127.7, 68.5 (d, *J* = 159.7 Hz), 68.0 (d, *J* = 7.0 Hz), 67.7 (d, *J* = 6.9 Hz), 43.9 (d, *J* = 9.6 Hz); <sup>31</sup>P NMR (162 MHz, CDCl<sub>3</sub>): δ 23.6; HRMS – ESI (*m/z*): [M + H]<sup>+</sup> called for C<sub>23</sub>H<sub>27</sub>NO<sub>3</sub>P, 396.1723, found 396.1722.

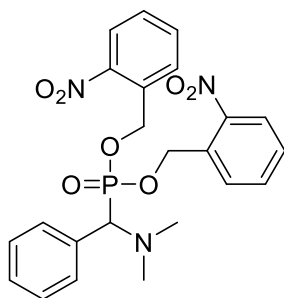

**Dis(2-nitrobenzyl) ((dimethylamino)(phenyl)methyl)phosphonate (3ae):** yellow oil, 382 mg, 67% yield. Purification: flash column chromatography (100 – 200 mesh silica gel, DCM : EA = 20 : 1 and 1% Et<sub>3</sub>N); <sup>1</sup>H NMR (400 MHz, CDCl<sub>3</sub>): δ 8.11 (d, *J* = 8.4, 1H), 8.00 (d, *J* = 8.4, 1H), 7.78 (d, *J* = 8.4 Hz, 1H), 7.66 (t, *J* = 7.6, 1H), 7.50 – 7.34 (m, 8H), 7.20 (d, *J* = 7.6 Hz, 1H), 5.71 – 5.57 (m, 2H), 5.33 – 5.14 (m, 2H), 4.05 (d, *J* = 22.8 Hz, 1H), 2.36 (s, 6H); <sup>13</sup>C NMR (100 MHz, CDCl<sub>3</sub>): δ 146.8, 146.4, 133.9, 133.8, 133.2 (d, *J* = 6.2 Hz), 132.8 (d, *J* = 6.0 Hz), 130.9 (d, *J* = 3.0 Hz), 130.6 (d, *J* = 9.1 Hz), 128.65, 128.60, 128.41, 128.39, 128.3, 128.1, 124.8, 124.7, 68.0 (d, *J* = 162.4 Hz), 65.2 (d, *J* = 6.0 Hz), 64.2 (d, *J* = 6.0 Hz), 43.5 (d, *J* = 9.9 Hz); <sup>31</sup>P NMR (162 MHz, CDCl<sub>3</sub>): δ 23.5; HRMS – ESI (*m/z*): [M + H]<sup>+</sup> called for C<sub>23</sub>H<sub>25</sub>N<sub>3</sub>O<sub>7</sub>P, 486.1425, found 486.1429.

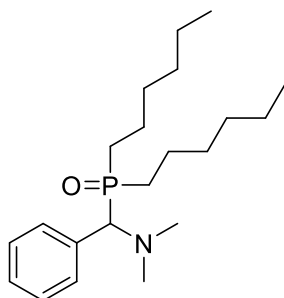

**((Dimethylamino)(phenyl)methyl)dihexylphosphine oxide (3ag):** colorless oil, 203 mg, 66% yield. Purification: flash column chromatography (200 – 300 mesh basic aluminum oxide, DCM : EA = 5 : 1 and 1% Et<sub>3</sub>N); <sup>1</sup>H NMR (500 MHz, CDCl<sub>3</sub>): δ 7.47 – 7.46 (m, 2H), 7.38 – 7.32 (m, 3H), 3.42 (d, *J* = 10.5

Hz, 1H), 2.33 (s, 6H), 2.02 – 1.79 (m, 2H), 1.63 – 1.11 (m, 18H), 0.89 (t,  $J = 6.5$  Hz, 3H), 0.80 (t,  $J = 6.5$  Hz, 3H);  $^{13}\text{C}$  NMR (100 MHz,  $\text{CDCl}_3$ ):  $\delta$  131.3, 131.2, 128.3, 128.2, 68.3 (d,  $J = 78.0$  Hz), 43.9 (d,  $J = 6.9$  Hz), 31.4, 31.2, 31.0 (d,  $J = 14.0$  Hz), 30.7 (d,  $J = 13.4$  Hz), 27.0 (d,  $J = 34.1$  Hz), 26.4 (d,  $J = 30.1$  Hz), 22.5, 22.4, 22.3 (d,  $J = 3.4$  Hz), 21.8 (d,  $J = 3.7$  Hz), 14.1, 14.0;  $^{31}\text{P}$  NMR (202 MHz,  $\text{CDCl}_3$ ):  $\delta$  50.9; HRMS – ESI ( $m/z$ ):  $[\text{M} + \text{H}]^+$  called for  $\text{C}_{21}\text{H}_{39}\text{NOP}$ , 352.2764, found 352.2765.

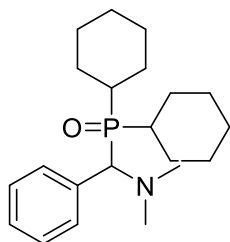

**Dicyclohexyl((dimethylamino)(phenyl)methyl)phosphine oxide (3ah):** white solid, 203 mg, 58% yield, mp: 177 – 179 °C. Purification: flash column chromatography (100 – 200 mesh silica gel, DCM : EA = 8 : 1 and 1%  $\text{Et}_3\text{N}$ );  $^1\text{H}$  NMR (500 MHz,  $\text{CDCl}_3$ ):  $\delta$  7.52 – 7.50 (m, 2H), 7.38 – 7.33 (m, 3H), 3.62 (d,  $J = 9.5$  Hz, 1H), 2.30 (s, 6H), 2.24 – 2.05 (m, 3H), 1.88 – 1.48 (m, 11H), 1.36 – 1.25 (m, 3H), 1.12 – 0.86 (m, 5H);  $^{13}\text{C}$  NMR (126 MHz,  $\text{CDCl}_3$ ):  $\delta$  131.8 (d,  $J = 6.8$  Hz), 130.8 (d,  $J = 2.1$  Hz), 128.02, 127.98, 64.2 (d,  $J = 75.0$  Hz), 43.3 (d,  $J = 7.1$  Hz), 37.9 (d,  $J = 22.7$  Hz), 37.5 (d,  $J = 26.7$  Hz), 27.5 (d,  $J = 12.0$  Hz), 27.3 (d,  $J = 12.0$  Hz), 27.11, 27.05 (d,  $J = 9.5$  Hz), 26.93 (d,  $J = 4.3$  Hz), 26.87 (d,  $J = 4.4$  Hz), 26.7 (d,  $J = 2.8$  Hz), 26.5, 26.2 (d,  $J = 2.9$  Hz), 26.1;  $^{31}\text{P}$  NMR (202 MHz,  $\text{CDCl}_3$ ):  $\delta$  50.9; HRMS – ESI ( $m/z$ ):  $[\text{M} + \text{H}]^+$  called for  $\text{C}_{21}\text{H}_{35}\text{NOP}$ , 348.2451, found 348.2454.

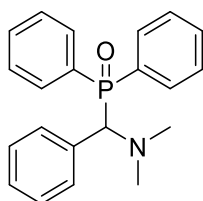

**((Dimethylamino)(phenyl)methyl)diphenylphosphine oxide (3aj):** white solid, 252 mg, 84% yield, mp: 182 – 183 °C. Purification: flash column chromatography (100 – 200 mesh silica gel, PE : DCM : EA = 1 : 1 : 2, 10% DCM and 1%  $\text{Et}_3\text{N}$ );  $^1\text{H}$  NMR (400 MHz,  $\text{CDCl}_3$ ):  $\delta$  7.97 – 7.92 (m, 2H), 7.53 – 7.44 (m, 7H), 7.30 – 7.28 (m, 1H), 7.24 – 7.21 (m, 5H), 4.31 (d,  $J = 10.6$  Hz, 1H), 2.38 (s, 6H);  $^{13}\text{C}$  NMR (126 MHz,  $\text{CDCl}_3$ ):  $\delta$  133.4 (d,  $J = 65.0$  Hz), 132.7 (d,  $J = 61.2$  Hz), 131.6 (d,  $J = 8.6$  Hz), 131.52 (d,  $J = 2.4$  Hz), 131.50 (d,  $J = 7.7$  Hz), 131.3 (d,  $J = 8.6$  Hz), 131.1 (d,  $J = 2.9$  Hz), 130.8 (d,  $J = 2.9$  Hz), 128.4 (d,  $J = 11.5$  Hz), 128.1 (d,  $J = 11.3$  Hz), 127.94, 127.89, 69.0 (d,  $J = 87.6$  Hz), 43.8 (d,  $J = 7.6$  Hz);  $^{31}\text{P}$  NMR (162 MHz,  $\text{CDCl}_3$ ):  $\delta$  30.8; HRMS – ESI ( $m/z$ ):  $[\text{M} + \text{Na}]^+$  called for  $\text{C}_{21}\text{H}_{22}\text{NONaP}$ , 358.1331, found 358.1332.

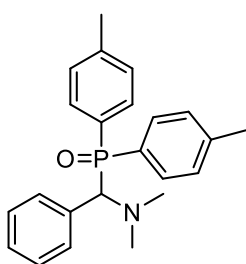

**((Dimethylamino)(phenyl)methyl)di-p-tolylphosphine oxide (3ak):** white solid, 280 mg, 71 % yield, mp: 150 – 151 °C. Purification: flash column chromatography (100 – 200 mesh silica gel) PE : DCM : EA = 2 : 1 : 1, 10% DCM and 1% Et<sub>3</sub>N); <sup>1</sup>H NMR (400 MHz, CDCl<sub>3</sub>): δ 7.84 – 7.79 (m, 2H), 7.48 – 7.45 (m, 2H), 7.39 – 7.35 (m, 2H), 7.30 – 7.27 (m, 2H), 7.24 – 7.22 (m, 3H), 7.02 – 6.99 (m, 2H), 4.27 (d, *J* = 10.8 Hz, 1H), 2.40 (s, 3H), 2.37 (s, 6H), 2.23 (s, 3H); <sup>13</sup>C NMR (100 MHz, CDCl<sub>3</sub>): δ 141.8, 141.4, 131.6, 131.5 (d, *J* = 2.0 Hz), 131.1 (d, *J* = 8.9 Hz), 131.0, 130.5 (d, *J* = 44.9 Hz), 129.5 (d, *J* = 41.2 Hz), 129.2 (d, *J* = 11.8 Hz), 128.9 (d, *J* = 11.4 Hz), 127.9, 127.8, 69.1 (d, *J* = 86.8 Hz), 43.8 (d, *J* = 7.6 Hz), 21.6 (d, *J* = 19.8 Hz); <sup>31</sup>P NMR (162 MHz, CDCl<sub>3</sub>): δ 31.1; HRMS – ESI (*m/z*): [M + Na]<sup>+</sup> called for C<sub>23</sub>H<sub>26</sub>NONaP, 386.1644, found 386.1653.

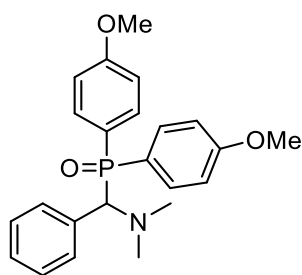

**((Dimethylamino)(phenyl)methyl)bis(4-methoxyphenyl)phosphine oxide (3al):** white solid, 293 mg, 76% yield, mp: 157 – 159 °C; Purification: flash column chromatography (100 – 200 mesh silica gel) DCM : EA = 4 : 1 and 1% Et<sub>3</sub>N); <sup>1</sup>H NMR (400 MHz, CDCl<sub>3</sub>): δ 7.86 – 7.81 (m, 2H), 7.44 – 7.36 (m, 4H), 7.23 – 7.21 (m, 3H), 7.0 (d, *J* = 6.4 Hz, 2H), 6.7 (d, *J* = 6.4 Hz, 2H), 4.20 (d, *J* = 10.8 Hz, 1H), 3.83 (s, 3H), 3.69 (s, 3H), 2.36 (s, 6H); <sup>13</sup>C NMR (100 MHz, CDCl<sub>3</sub>): δ 162.1 (d, *J* = 2.8 Hz), 161.7 (d, *J* = 2.8 Hz), 133.4 (d, *J* = 9.6 Hz), 133.0 (d, *J* = 9.8 Hz), 131.5 (d, *J* = 7.3 Hz), 131.1, 127.9, 127.8, 125.0 (d, *J* = 39.9 Hz), 124.0 (d, *J* = 36.5 Hz), 114.0 (d, *J* = 12.3 Hz), 113.7 (d, *J* = 12.1 Hz), 69.5 (d, *J* = 87.0 Hz), 55.3 (d, *J* = 15.4 Hz), 43.7 (d, *J* = 7.5 Hz); <sup>31</sup>P NMR (162 MHz, CDCl<sub>3</sub>): δ 31.0; HRMS – ESI (*m/z*): [M + Na]<sup>+</sup> called for C<sub>23</sub>H<sub>26</sub>NO<sub>3</sub>NaP, 418.1543, found 418.1544.

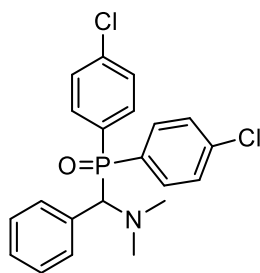

**Bis(4-chlorophenyl)((dimethylamino)(phenyl)methyl)phosphine oxide (3am):** white solid, 327 mg, 81% yield, mp: 139 – 140 °C. Purification: flash column chromatography (100-200 mesh silica gel, PE : DCM : EA = 5 : 1 : 1, 10% DCM and 1% Et<sub>3</sub>N); <sup>1</sup>H NMR (400 MHz, CDCl<sub>3</sub>): δ 7.88 – 7.83 (m, 2H), 7.49 – 7.39 (m, 6H), 7.27 – 7.20 (m, 5H), 4.25 (d, *J* = 10.8 Hz, 1H), 2.37 (s, 6H); <sup>13</sup>C NMR (100 MHz, CDCl<sub>3</sub>): δ 138.4 (d, *J* = 3.4 Hz), 138.0 (d, *J* = 3.4 Hz), 133.0 (d, *J* = 9.2 Hz), 132.5 (d, *J* = 9.2 Hz), 131.6 (d, *J* = 46.9 Hz), 131.4 (d, *J* = 7.7 Hz), 130.7 (d, *J* = 44.2 Hz), 130.1, 128.9 (d, *J* = 12.0 Hz), 128.7 (d, *J* = 11.7 Hz), 128.3, 128.2, 69.1 (d, *J* = 88.5 Hz), 43.7 (d, *J* = 7.7 Hz); <sup>31</sup>P NMR (162 MHz, CDCl<sub>3</sub>): δ 29.8; HRMS – ESI (*m/z*): [M + Na]<sup>+</sup> called for C<sub>21</sub>H<sub>20</sub>NONaPCl<sub>2</sub>, 426.0552, found 426.0560.

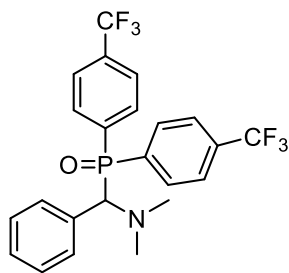

**((Dimethylamino)(phenyl)methyl)bis(4-(trifluoromethyl)phenyl)phosphine oxide (3an):** white solid, 314 mg, 67% yield, mp: 46 – 47 °C. Purification: flash column chromatography (200 – 300 mesh basic aluminum oxide, PE : DCM : EA = 6 : 1 : 1 and 1% Et<sub>3</sub>N); <sup>1</sup>H NMR (500 MHz, CDCl<sub>3</sub>): δ 8.08 – 8.05 (m, 2H), 7.78 – 7.76 (m, 2H), 7.65 – 7.62 (m, 2H), 7.51 – 7.46 (m, 4H), 7.28 – 7.27 (m, 3H), 4.35 (d, *J* = 11.0 Hz, 1H), 2.38 (s, 6H); <sup>13</sup>C NMR (100 MHz, CDCl<sub>3</sub>): δ 136.8 (q, <sup>2</sup>*J*<sub>C-F</sub> = 43.8 Hz), 133.9 – 133.2 (m, 1C), 132.0 (d, *J*<sub>C-P</sub> = 8.7 Hz), 131.6 (d, *J*<sub>C-P</sub> = 8.8 Hz), 131.4 (d, *J*<sub>C-P</sub> = 7.9 Hz), 129.6 (d, *J*<sub>C-P</sub> = 3.2 Hz), 128.5, 128.4, 125.6 – 125.1 (m, 3C), 125.0 (dq, <sup>1</sup>*J*<sub>C-F</sub> = 248.5 Hz, <sup>5</sup>*J*<sub>C-P</sub> = 22.5), 68.8 (d, <sup>1</sup>*J*<sub>C-P</sub> = 88.9 Hz), 43.7 (d, <sup>3</sup>*J*<sub>C-P</sub> = 7.7 Hz); <sup>31</sup>P NMR (202 MHz, CDCl<sub>3</sub>): δ 28.9; <sup>19</sup>F NMR (376 MHz, CDCl<sub>3</sub>): δ -63.2, -63.3; HRMS – ESI (m/z): [M + H]<sup>+</sup> called for C<sub>23</sub>H<sub>21</sub>NOF<sub>6</sub>P, 472.1259, found 472.1265.

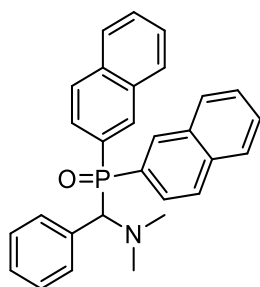

**((Dimethylamino)(phenyl)methyl)di(naphthalen-2-yl)phosphine oxide (3ao):** white solid, 261 mg, 55% yield, mp: 192 – 193 °C. Purification: flash column chromatography (100 – 200 mesh silica gel, PE : DCM : EA = 3 : 1 : 1, 10% DCM and 1% Et<sub>3</sub>N); <sup>1</sup>H NMR (400 MHz, CDCl<sub>3</sub>): δ 8.62 (d, *J* = 12.8 Hz, 1H), 8.20 (d, *J* = 12.4 Hz, 1H), 7.96 – 7.87 (m, 4H), 7.76 – 7.65 (m, 3H), 7.60 – 7.42 (m, 7H), 7.25 – 7.18 (m, 3H), 4.56 (d, *J* = 10.8 Hz, 1H), 2.44 (s, 6H); <sup>13</sup>C NMR (100 MHz, CDCl<sub>3</sub>): δ 134.7 (d, *J* = 2.5 Hz), 134.3 (d, *J* = 2.4 Hz), 133.6 (d, *J* = 7.8 Hz), 133.3 (d, *J* = 7.7 Hz), 132.8 (d, *J* = 12.6 Hz), 132.4 (d, *J* = 12.1 Hz), 131.6, 131.5, 130.8 (d, *J* = 49.5 Hz), 130.7 (d, *J* = 2.9 Hz), 129.9 (d, *J* = 45.2 Hz), 129.08, 128.87, 128.1, 128.04, 128.02, 127.98, 127.94, 127.86, 127.84, 127.7, 126.7 (d, *J* = 12.0 Hz), 126.6 (d, *J* = 9.4 Hz), 125.9 (d, *J* = 9.6 Hz), 68.9 (d, *J* = 87.3 Hz), 43.8 (d, *J* = 7.6 Hz); <sup>31</sup>P NMR (162 MHz, CDCl<sub>3</sub>): δ 31.2; HRMS – ESI (m/z): [M + Na]<sup>+</sup> called for C<sub>29</sub>H<sub>26</sub>NONaP, 458.1644, found 458.1643.

## 5. Synthesis and Characterization of Reactants

### 5.1 General Synthesis Procedure for phosphine oxide

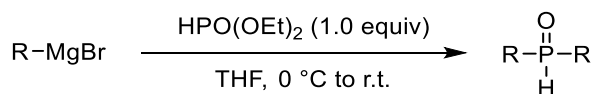

**Method A:** To a solution of Grignard reagent (0.5 M, 40 mmol, 4.0 equiv) in THF (80.0 mL), under nitrogen and cooled in an ice-bath, was added a solution of HPO(OEt)<sub>2</sub> (10 mmol, 1.0 equiv) in



THF (8.0 mL) dropwise at a rate to maintain temperature between 0 ~ 10 °C. The reaction was allowed to stir at room temperature for 12 h. The reaction mixture was quenched with 1 M HCl and extracted with EA. The combined organic layers were washed with brine, dried over anhydrous Na<sub>2</sub>SO<sub>4</sub>, filtered, concentrated and purified with silica gel column chromatography (PE/DCM/EtOAc).

**Method B<sup>5</sup>:** A dry 500 mL 3-neck round containing a magnetic stir bar was charged with Phosphorus trichloride (2.75 g, 20 mmol) and toluene (120 mL). The addition funnel was charged with 2-nitrobenzyl alcohol (6.126 g, 40 mmol), toluene (40 mL), and *N,N*-dimethylaniline (4.85 g, 40 mmol). The mixture in the addition funnel was heated via a heat gun until homogeneous. This solution was added to the pot in small portions over 30 min, re-heating as necessary. After 1 h, 2-nitrobenzyl alcohol (3.06 g, 20 mmol) in warm toluene (40 mL) was added to the reaction over 15 min via the addition funnel. The reaction vessel was wrapped with aluminum foil to exclude light. After 12 h, the reaction mixture was washed with deionized water (3 × 50 mL), an aqueous solution of ammonia (5 M, 2 × 50 mL), deionized water (2 × 50 mL), and brine (50 mL). The organic solution was dried over anhydrous sodium sulfate, filtered, and concentrated in vacuo. Products were prepared by recrystallization with toluene.

## 5.2 Characterization of the Compounds

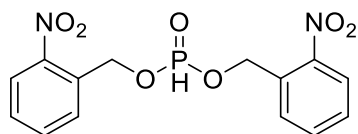

**Bis(2-nitrobenzyl) phosphonate (2e)<sup>5</sup>:** prepared by method B, white solid, 3.12 g, 44% yield, mp: 91 – 93 °C. <sup>1</sup>H NMR (400 MHz, CDCl<sub>3</sub>): δ 8.15 (d, *J* = 8.4 Hz, 2H), 7.77 – 7.68 (m, 4H), 7.55 – 7.51 (m, 2H), 7.17 (d, *J* = 716.0 Hz, 1H), 5.64 – 5.51 (m, 4H); <sup>13</sup>C NMR (150 MHz, CDCl<sub>3</sub>): δ 146.8, 134.3, 131.9 (d, *J* = 7.6 Hz), 129.2, 128.7, 125.2, 64.2 (d, *J* = 4.3 Hz); <sup>31</sup>P NMR (162 MHz, CDCl<sub>3</sub>): δ 8.1.

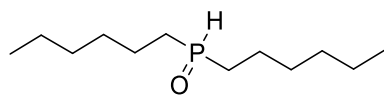

**Dihexylphosphine oxide (2g)<sup>6</sup>:** prepared by method A, white solid, 1.92 g, 59% yield, mp: 69 – 70 °C. Purification: flash column chromatography (100 – 200 mesh silica gel, EA: DCM: PE = 2 : 1 : 1 and 1% Et<sub>3</sub>N); <sup>1</sup>H NMR (400 MHz, CDCl<sub>3</sub>): δ 6.83 (d, *J* = 445.2 Hz, 1H), 1.82 – 1.56 (m, 8H), 1.42 – 1.38 (m, 4H), 1.30 – 1.27 (m, 8H), 0.87 (t, *J* = 6.8 Hz, 6H); <sup>13</sup>C NMR (100 MHz, CDCl<sub>3</sub>): δ 30.9, 30.0 (d, *J* = 13.2 Hz), 27.9 (d, *J* = 64.6 Hz), 22.0, 21.4 (d, *J* = 3.7 Hz), 13.6; <sup>31</sup>P NMR (162 MHz, CDCl<sub>3</sub>): δ 34.6.

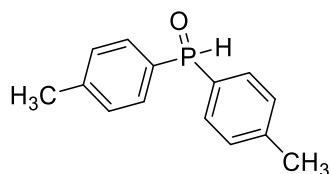

**Di-p-tolylphosphine oxide (2k)<sup>7</sup>:** prepared by method A, yellow solid, 2.42 g, 70% yield, mp: 96 –

97 °C. Purification: flash column chromatography (100 – 200 mesh silica gel, PE : EA = 1 : 1, 10% DCM and 1% Et<sub>3</sub>N); <sup>1</sup>H NMR (400 MHz, CDCl<sub>3</sub>): δ 8.02 (d, *J* = 478.4 Hz, 1H), δ 7.59 – 7.54 (m, 4H), 7.30–7.27 (m, 4H), 2.39 (s, 6H); <sup>13</sup>C NMR (100 MHz, CDCl<sub>3</sub>): δ 143.2 (d, *J* = 2.8 Hz), 130.8 (d, *J* = 11.8 Hz), 129.7 (d, *J* = 13.2 Hz), 128.4 (d, *J* = 103.2 Hz), 21.7 (d, *J* = 1.3 Hz); <sup>31</sup>P NMR (162 MHz, CDCl<sub>3</sub>): δ 21.7.

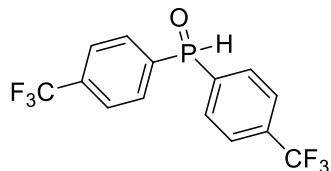

**Bis(4-(trifluoromethyl)phenyl)phosphine oxide (2n)**<sup>7</sup>: prepared by method A, yellow solid, 1.78 g, 50% yield, mp: 58 – 59 °C. Purification: flash column chromatography (100 – 200 mesh silica gel, PE : EA : DCM = 2.5 : 1 : 1 and 1% Et<sub>3</sub>N); <sup>1</sup>H NMR (400 MHz, CDCl<sub>3</sub>): δ 8.20 (d, *J* = 491.2 Hz, 1H), 7.89 – 7.78 (m, 8H); <sup>13</sup>C NMR (100 MHz, CDCl<sub>3</sub>): δ 134.9 (q, *J*<sup>2</sup><sub>C-F</sub> = 32.5 Hz), 131.3 (d, *J*<sup>2</sup><sub>C-P</sub> = 11.9 Hz), 126.1 (dq, *J*<sup>3</sup><sub>C-P</sub> = 13.0 Hz, *J*<sup>3</sup><sub>C-F</sub> = 3.7 Hz), 123.4 (q, *J*<sup>1</sup><sub>C-F</sub> = 271.0 Hz); <sup>31</sup>P NMR (162 MHz, CDCl<sub>3</sub>): δ 17.9; <sup>19</sup>F NMR (376 MHz, CDCl<sub>3</sub>): δ -63.3.

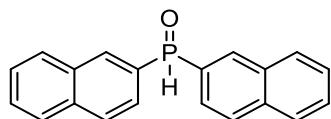

**Di(naphthalen-2-yl)phosphine oxide (2o)**<sup>8</sup>: prepared by method A, yellow solid, 0.81g, 25% yield, mp: 98 – 99 °C; Purification: flash column chromatography (100 – 200 mesh silica gel, PE : EA = 1.5 : 1, 10% DCM and 1% Et<sub>3</sub>N); <sup>1</sup>H NMR (400 MHz, CDCl<sub>3</sub>): 8.39 (d, *J* = 15.6 Hz, 2H), δ 8.35 (d, *J* = 481.2 Hz, 1H), 7.94 – 7.86 (m, 6H), 7.66 – 7.55 (m, 6H); <sup>13</sup>C NMR (100 MHz, CDCl<sub>3</sub>): δ 135.2 (d, *J* = 2.5 Hz), 133.0 (d, *J* = 10.9 Hz), 132.6 (d, *J* = 14.1 Hz), 129.1, 129.0, 128.9, 128.6, 128.1, 127.3, 125.3 (d, *J* = 12.4 Hz); <sup>31</sup>P NMR (162 MHz, CDCl<sub>3</sub>): δ 21.7.

## 6. References

1. S. L. McDonald and Q. Wang, *Angew. Chem. Int. Ed.*, 2014, **53**, 1867-1871.
2. Y. Gao, Z. Huang, R. Zhuang, J. Xu, P. Zhang, G. Tang and Y. Zhao, *Org. Lett.*, 2013, **15**, 4214-4217.
3. P. Sun, Z. Hu and Z. Huang, *Synth. Commun.*, 2004, **34**, 4293-4299.
4. N. Azizi and M. R. Saidi, *Tetrahedron*, 2003, **59**, 5329-5332.
5. G. D. Joly and E. N. Jacobsen, *J. Am. Chem. Soc.*, 2004, **126**, 4102-4103.
6. V. Krishnamurti, C. Barrett and G. K. S. Prakash, *Org. Lett.*, 2019, **21**, 1526-1529.
7. C. A. Busacca, J. C. Lorenz, N. Grinberg, N. Haddad, M. Hrapchak, B. Latli, H. Lee, P. Sabila, A. Saha, M. Sarvestani, S. Shen, R. Varsolona, X. Wei and C. H. Senanayake, *Org. Lett.*, 2005, **7**, 4277-4280.
8. D. Savary and O. Baudoin, *Angew. Chem. Int. Ed.*, 2021, **60**, 5136-5140.

## 7. NMR Spectra Copies

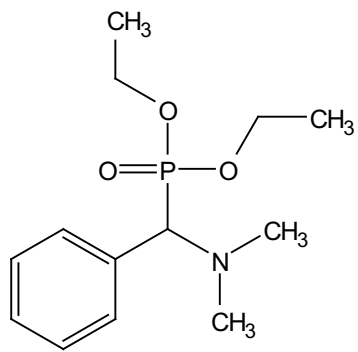

**3aa**  
 $^1\text{H NMR}$  (400 MHz,  $\text{CDCl}_3$ )

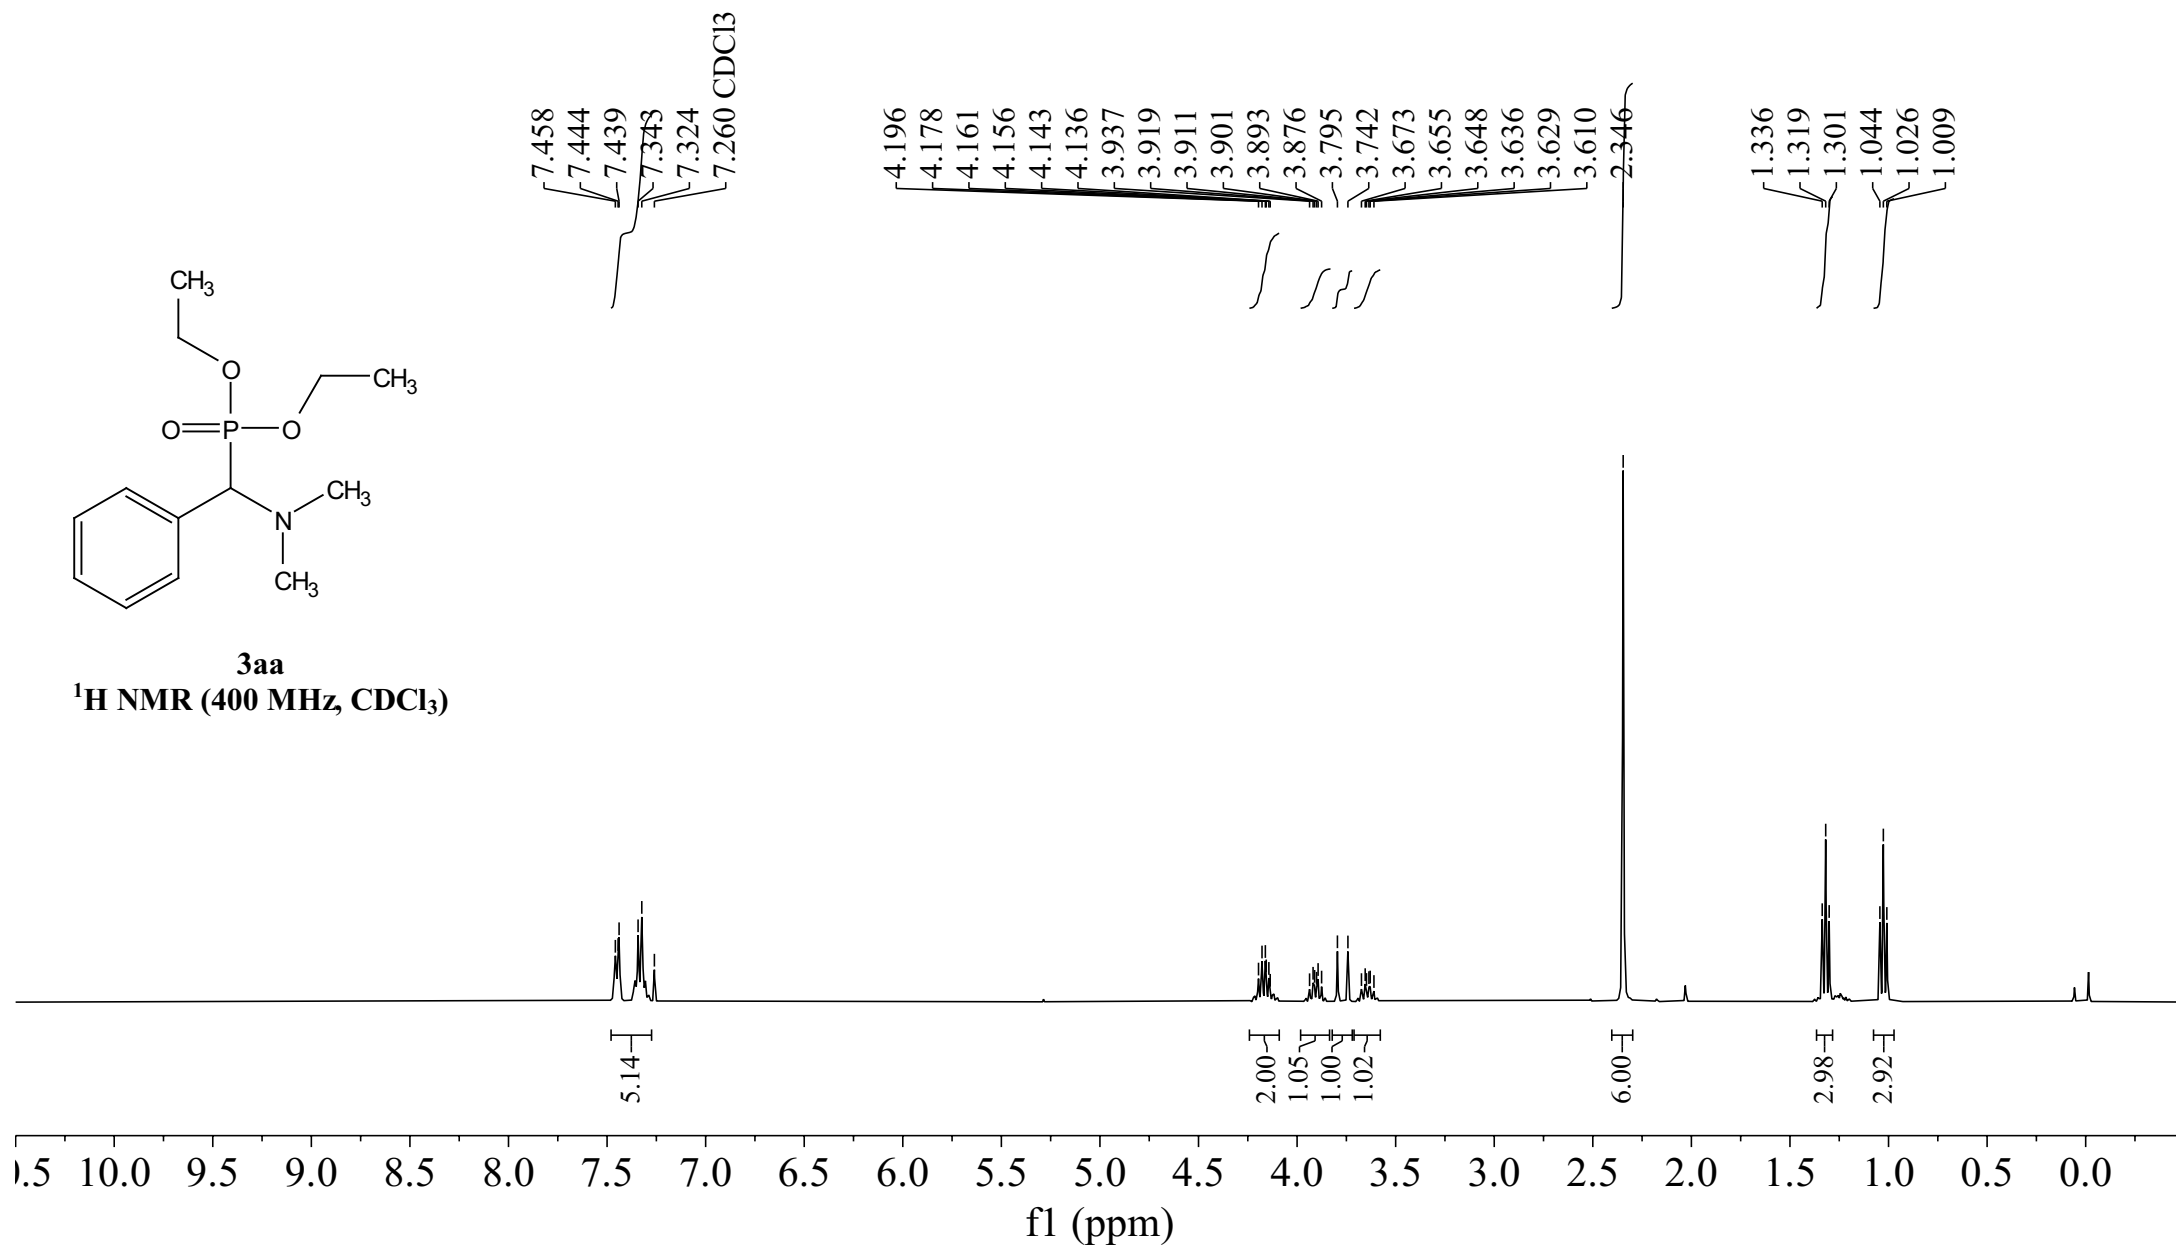

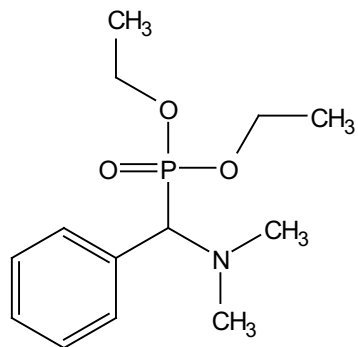

**3aa**

**$^{13}\text{C}$  NMR (100 MHz,  $\text{CDCl}_3$ )**

132.561  
132.544  
130.536  
130.453  
128.068  
127.970  
127.953

77.479  
77.160  $\text{CDCl}_3$   
77.160  
76.842  
69.067  
67.469  
62.388  
62.316

43.866  
43.771

16.459  
16.402  
16.161  
16.105

200 190 180 170 160 150 140 130 120 110 100 90 80 70 60 50 40 30 20 10 0 -1

f1 (ppm)

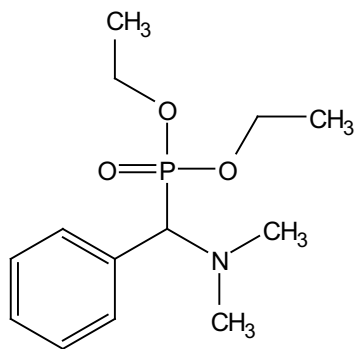

**3aa**

**<sup>31</sup>P NMR (162 MHz, CDCl<sub>3</sub>)**

—22.810

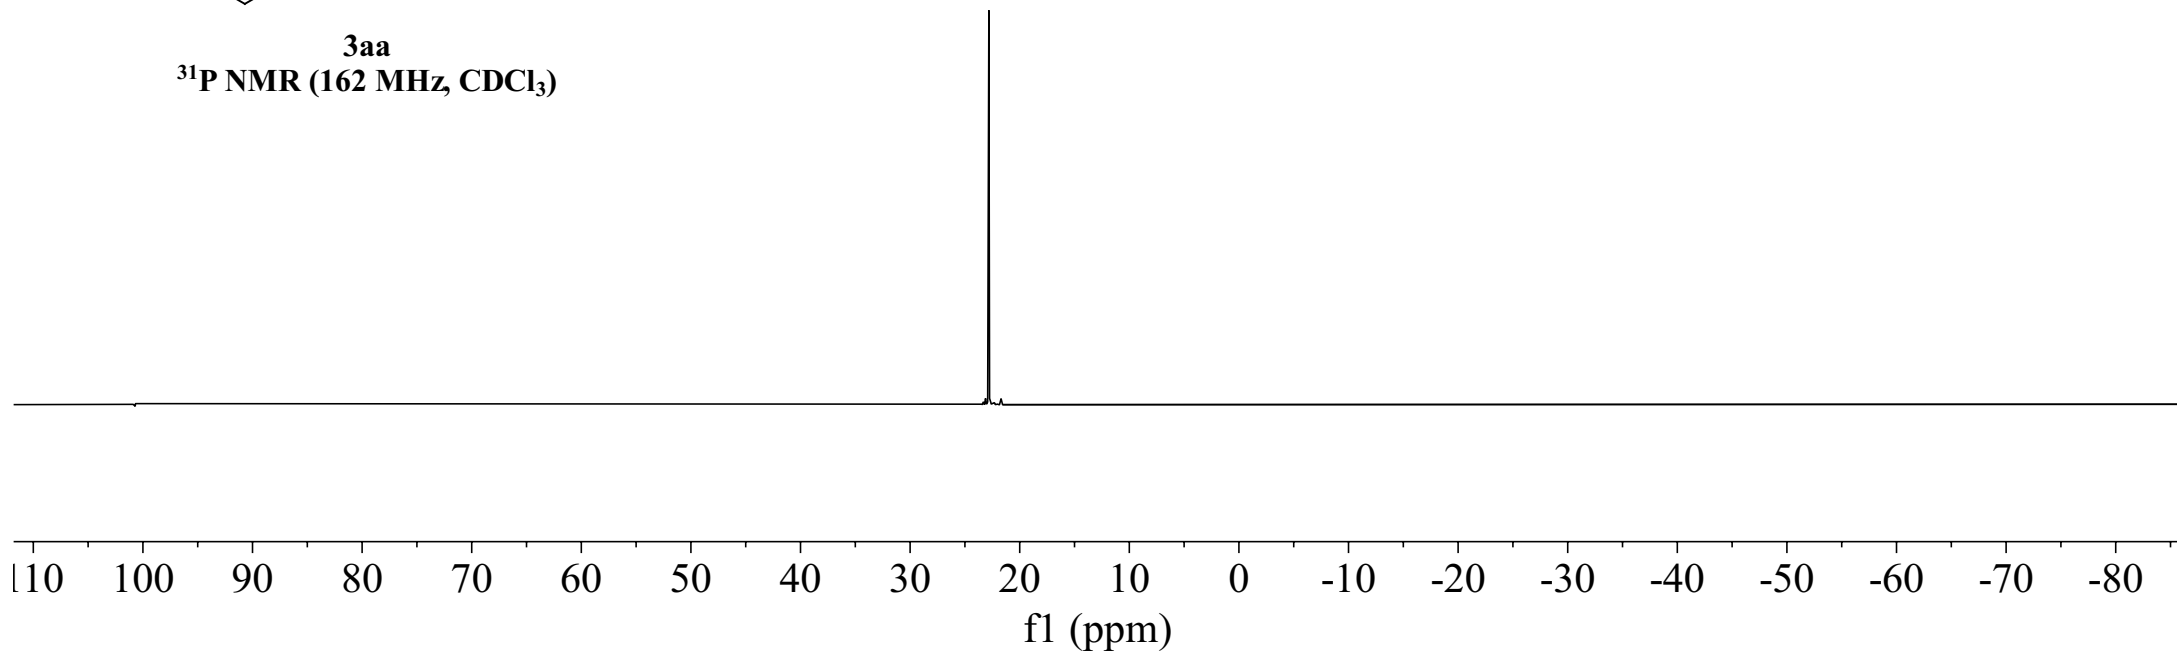

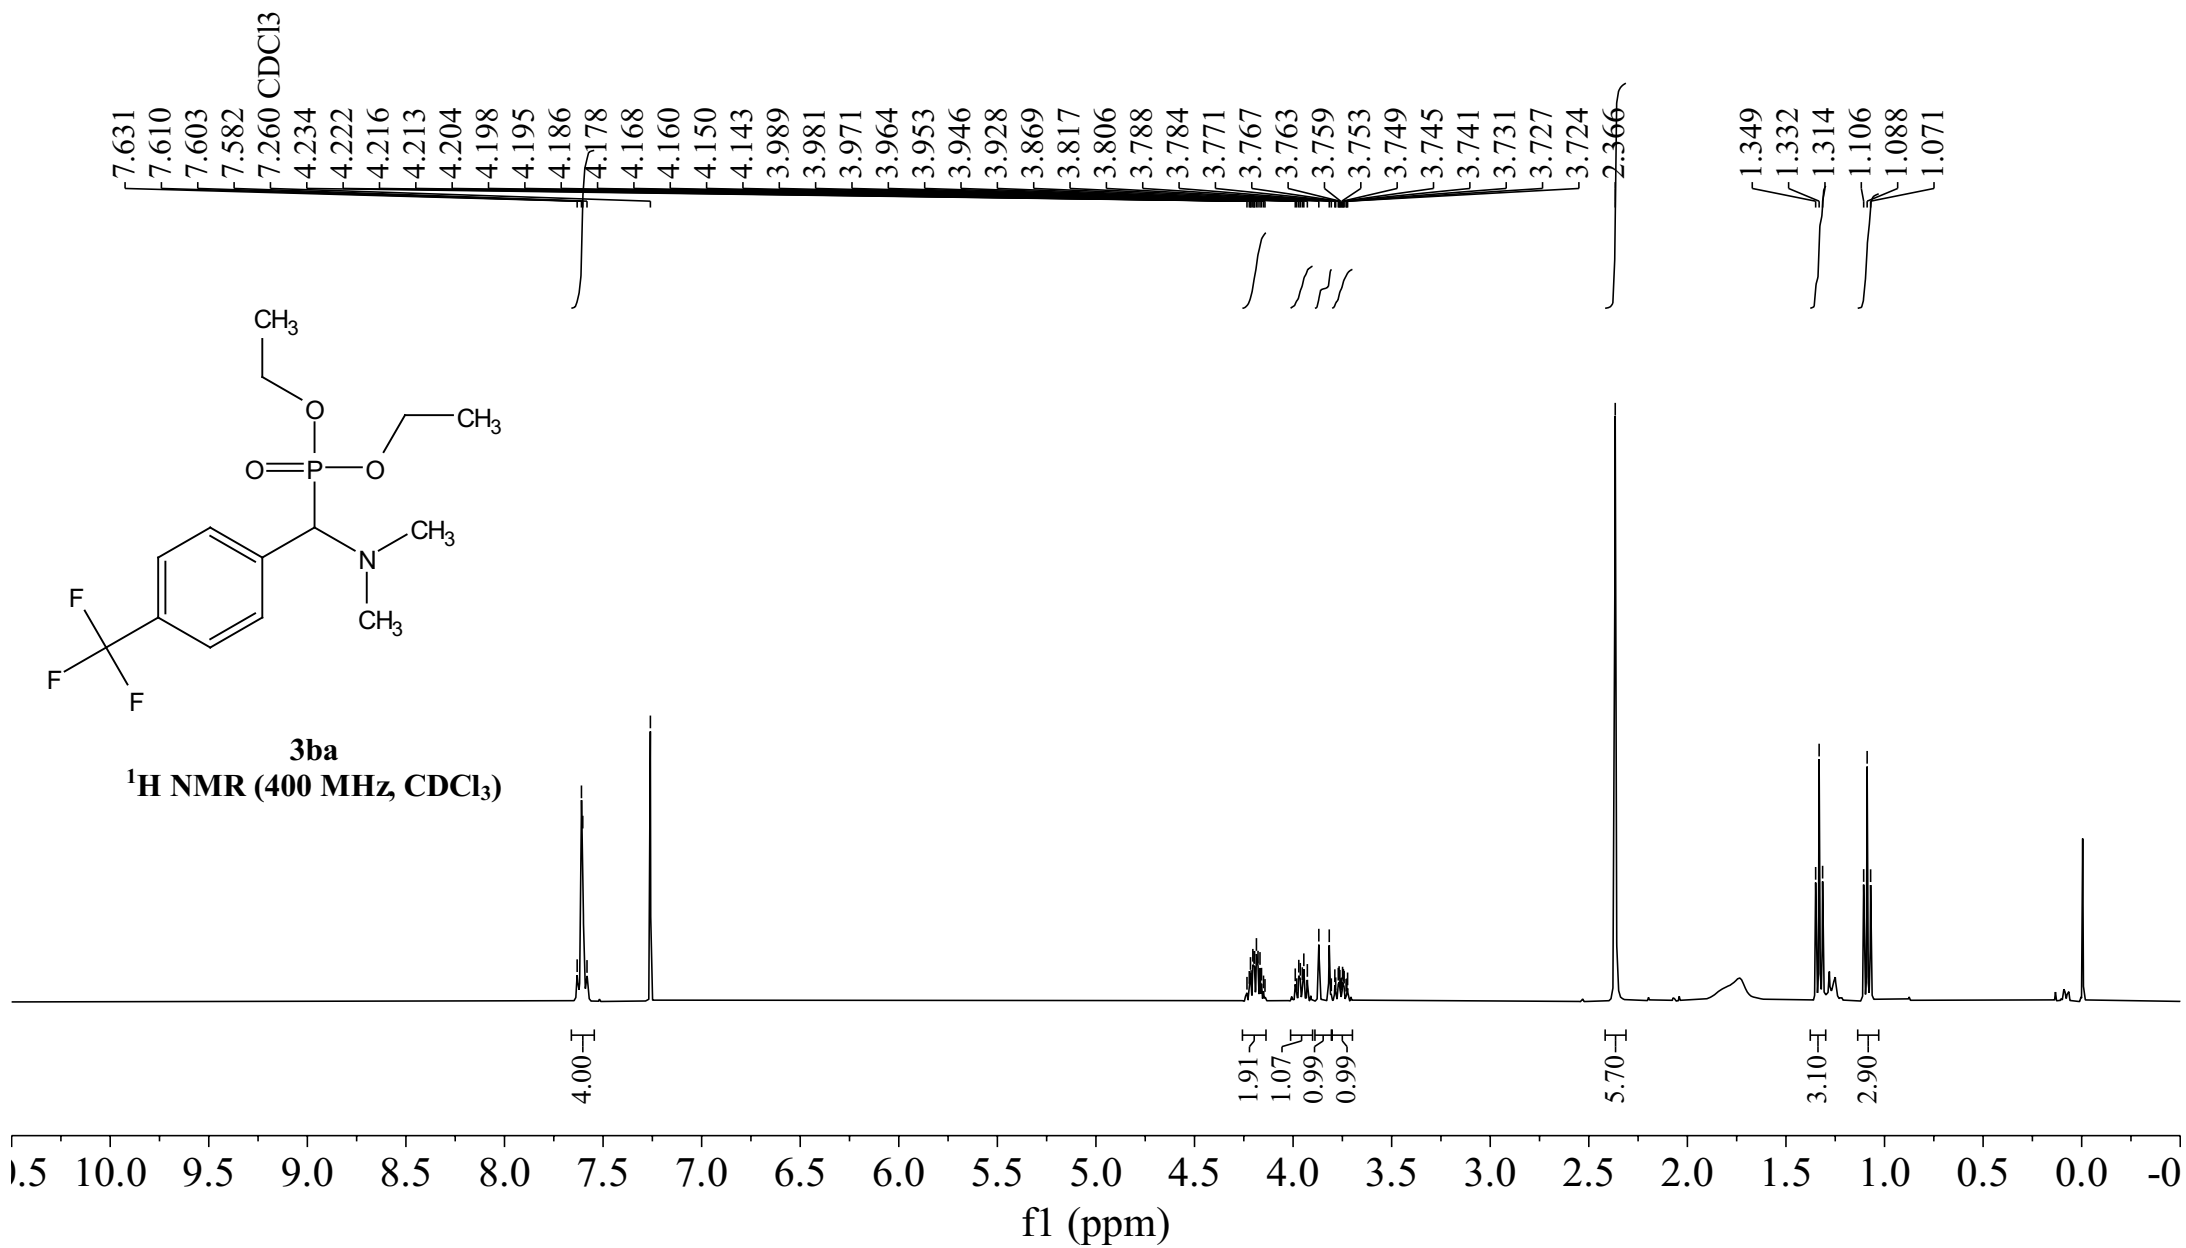

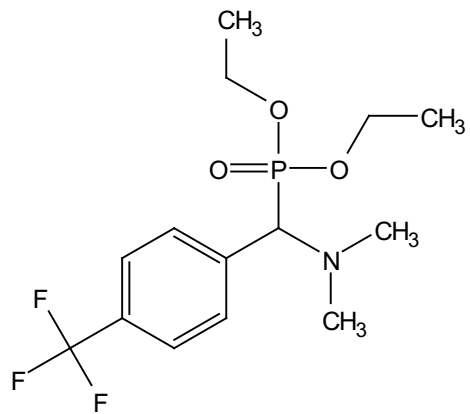

**3ba**  
**<sup>13</sup>C NMR (125 MHz, CDCl<sub>3</sub>)**

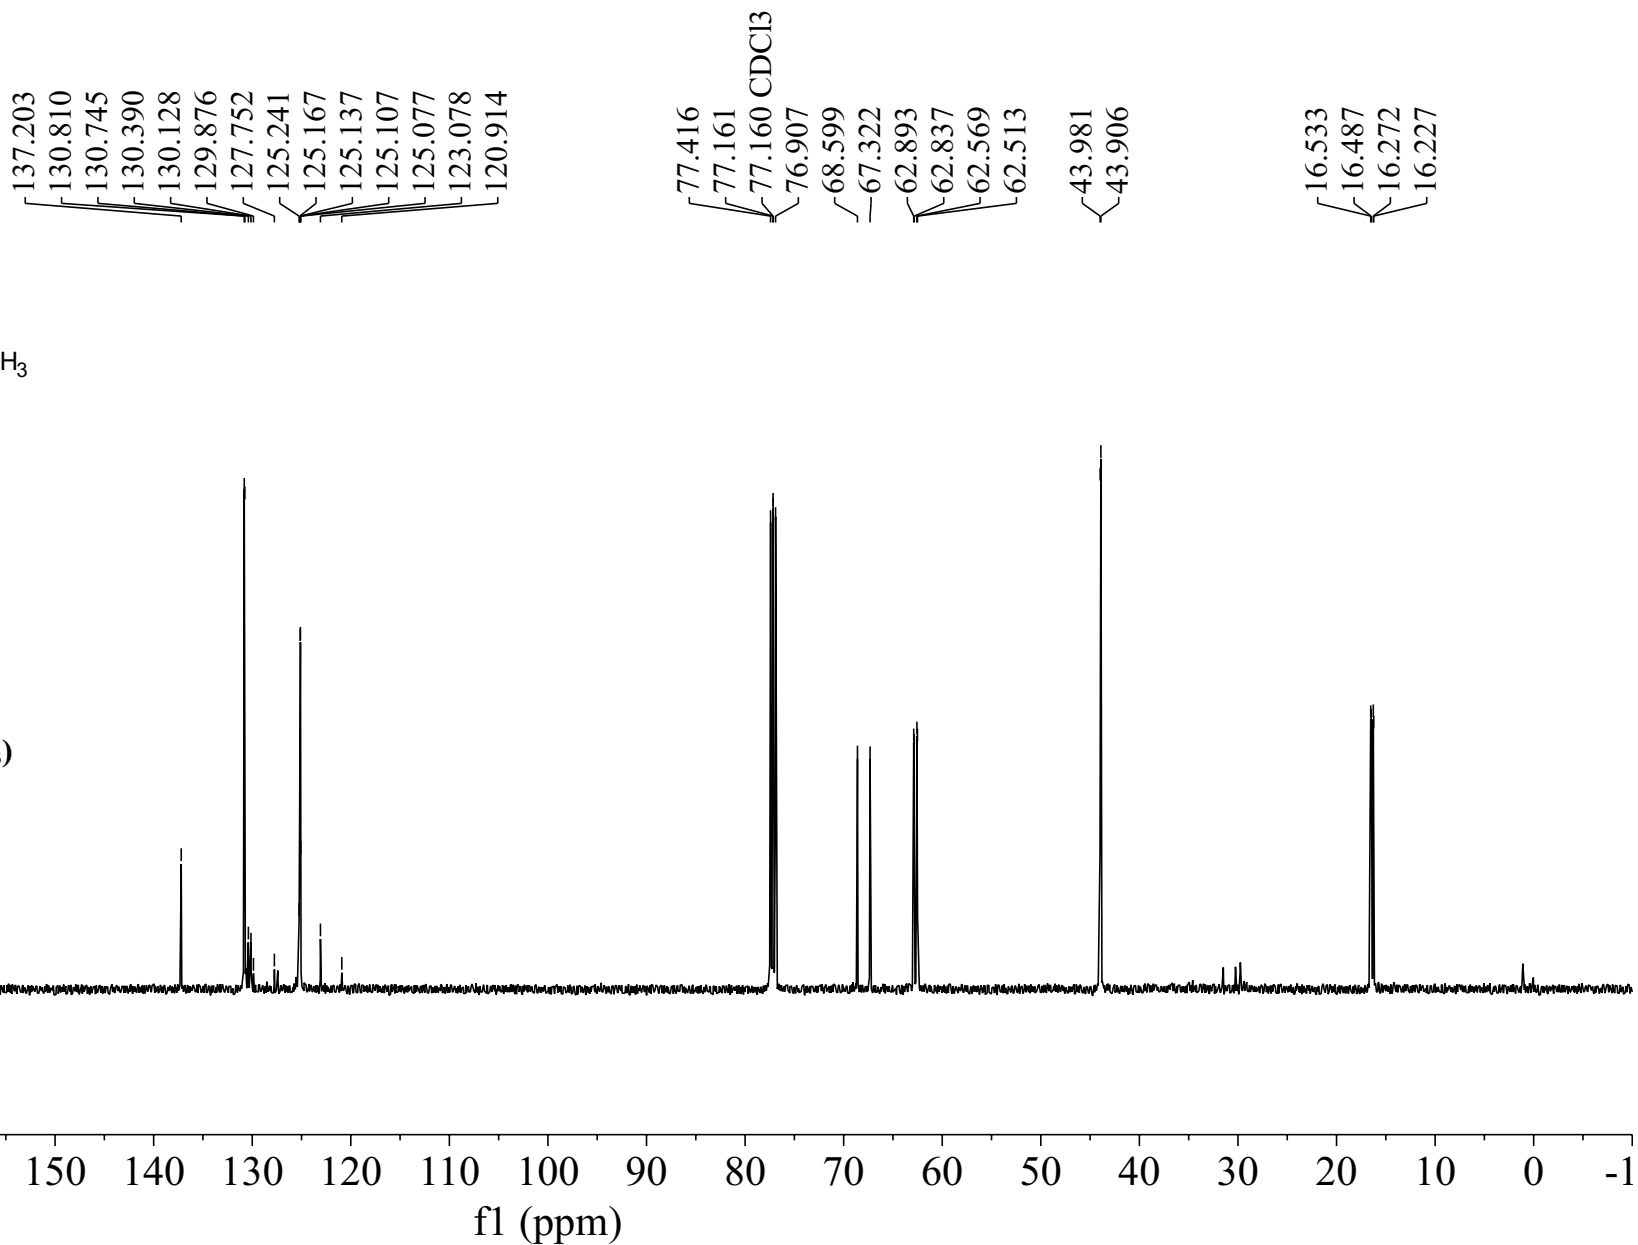

-21.783

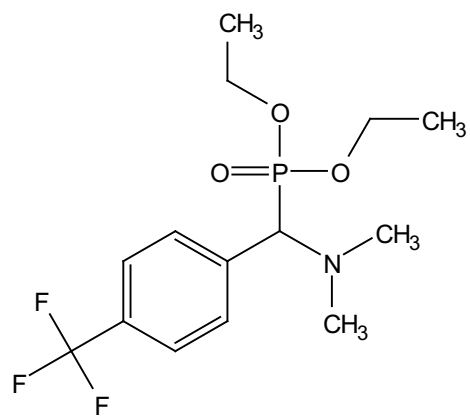

**3ba**

<sup>31</sup>P NMR (162 MHz, CDCl<sub>3</sub>)

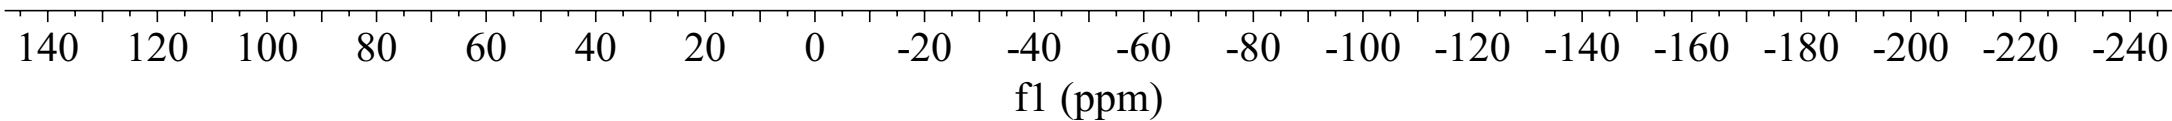



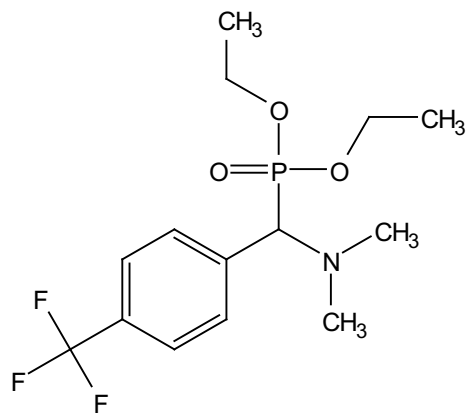

**3ba**  
**<sup>19</sup>F NMR (376 MHz, CDCl<sub>3</sub>)**

-62.579  
-62.584

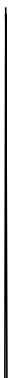

10 0 -10 -20 -30 -40 -50 -60 -70 -80 -90 -100 -110 -120 -130 -140 -150 -160 -170 -180 -190 -200 -210

f1 (ppm)

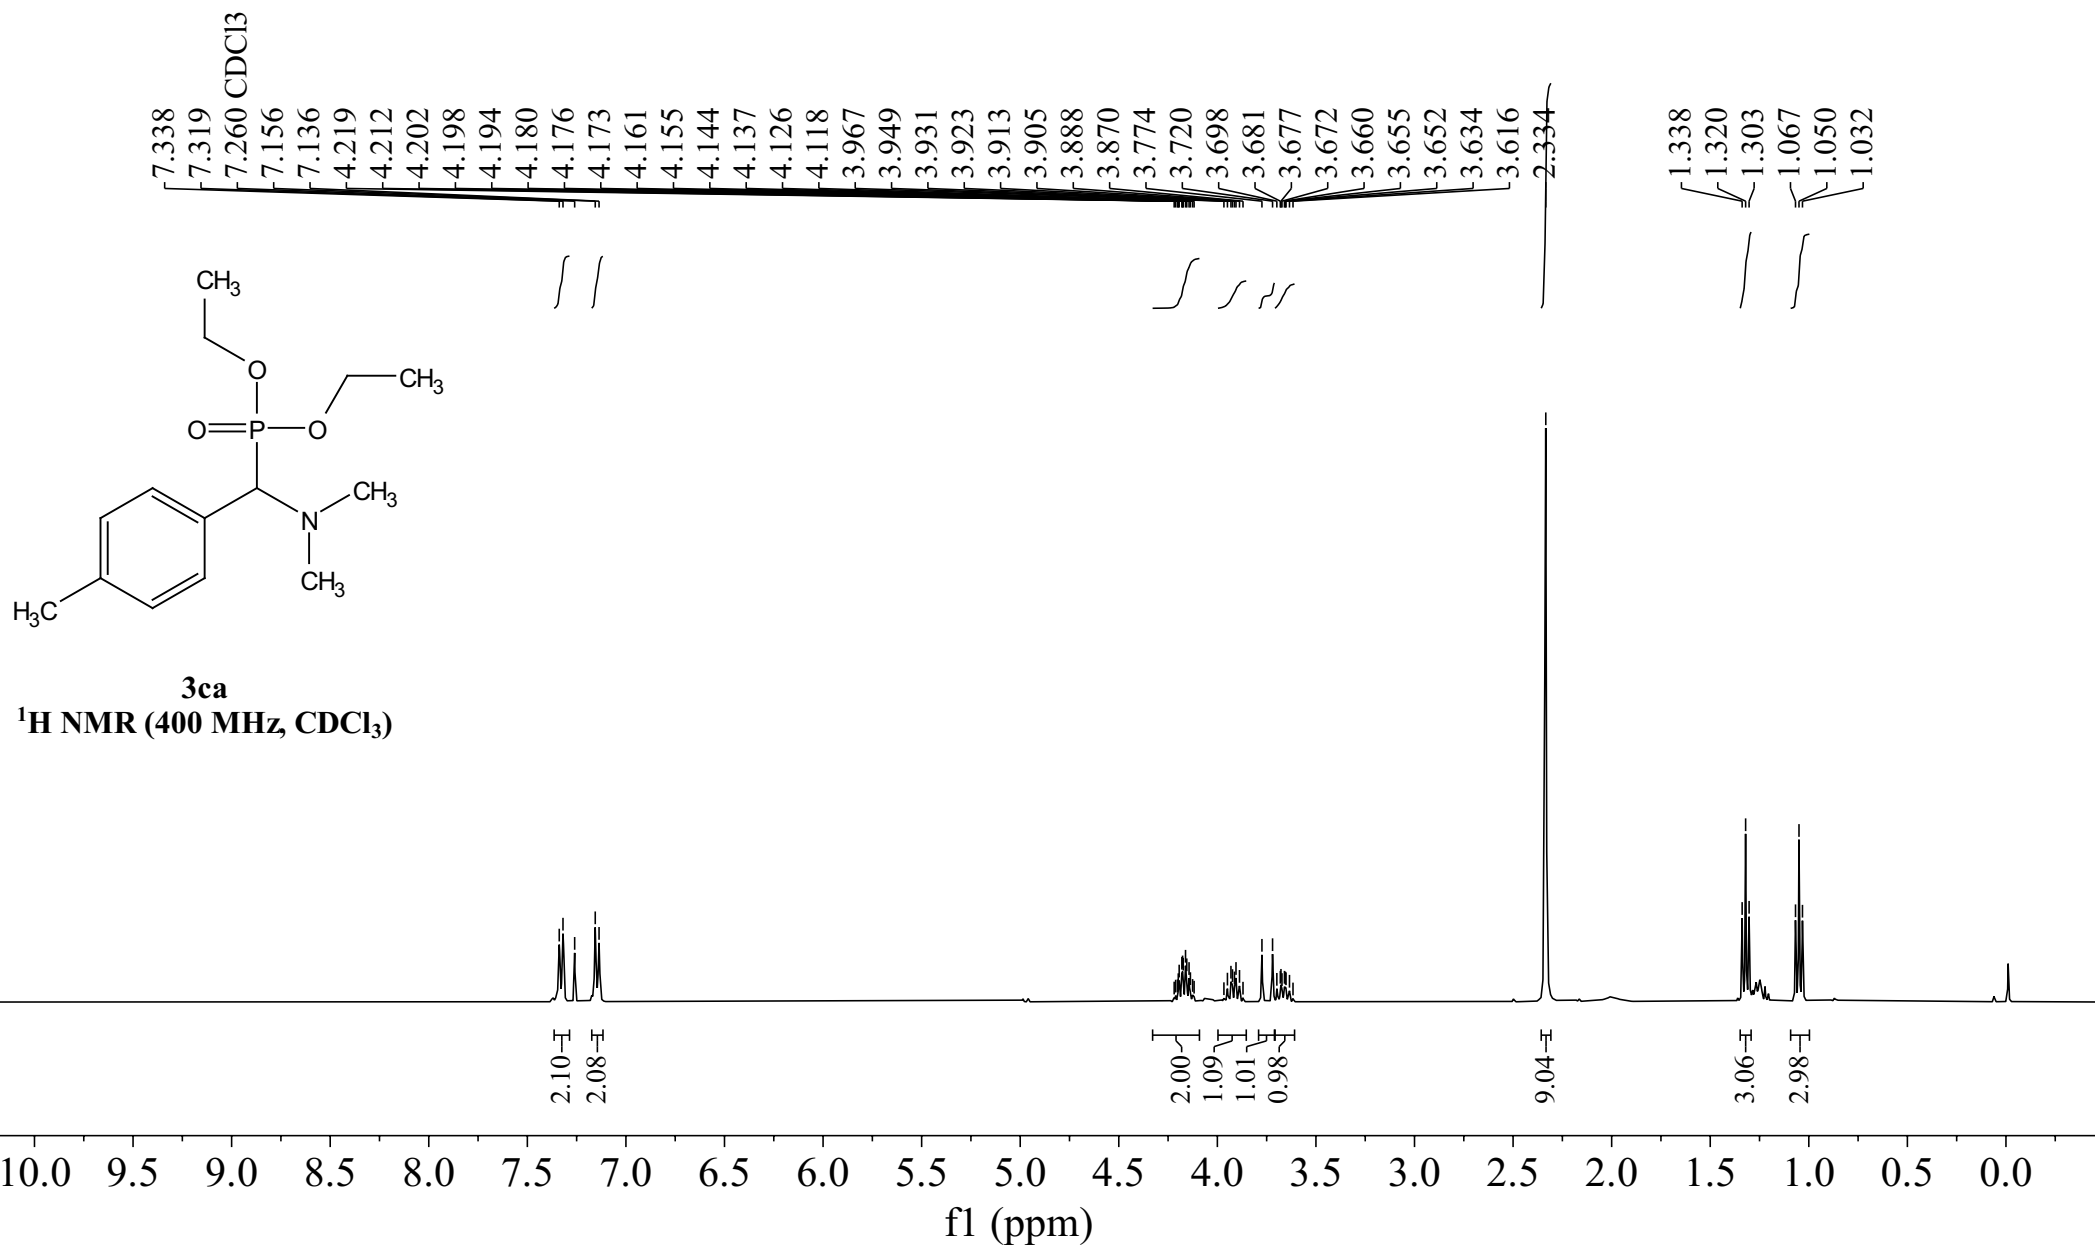

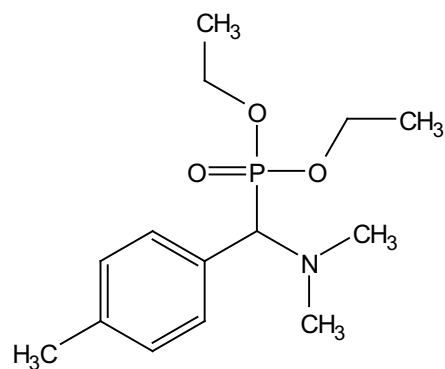

3ca

<sup>13</sup>C NMR (100 MHz, CDCl<sub>3</sub>)

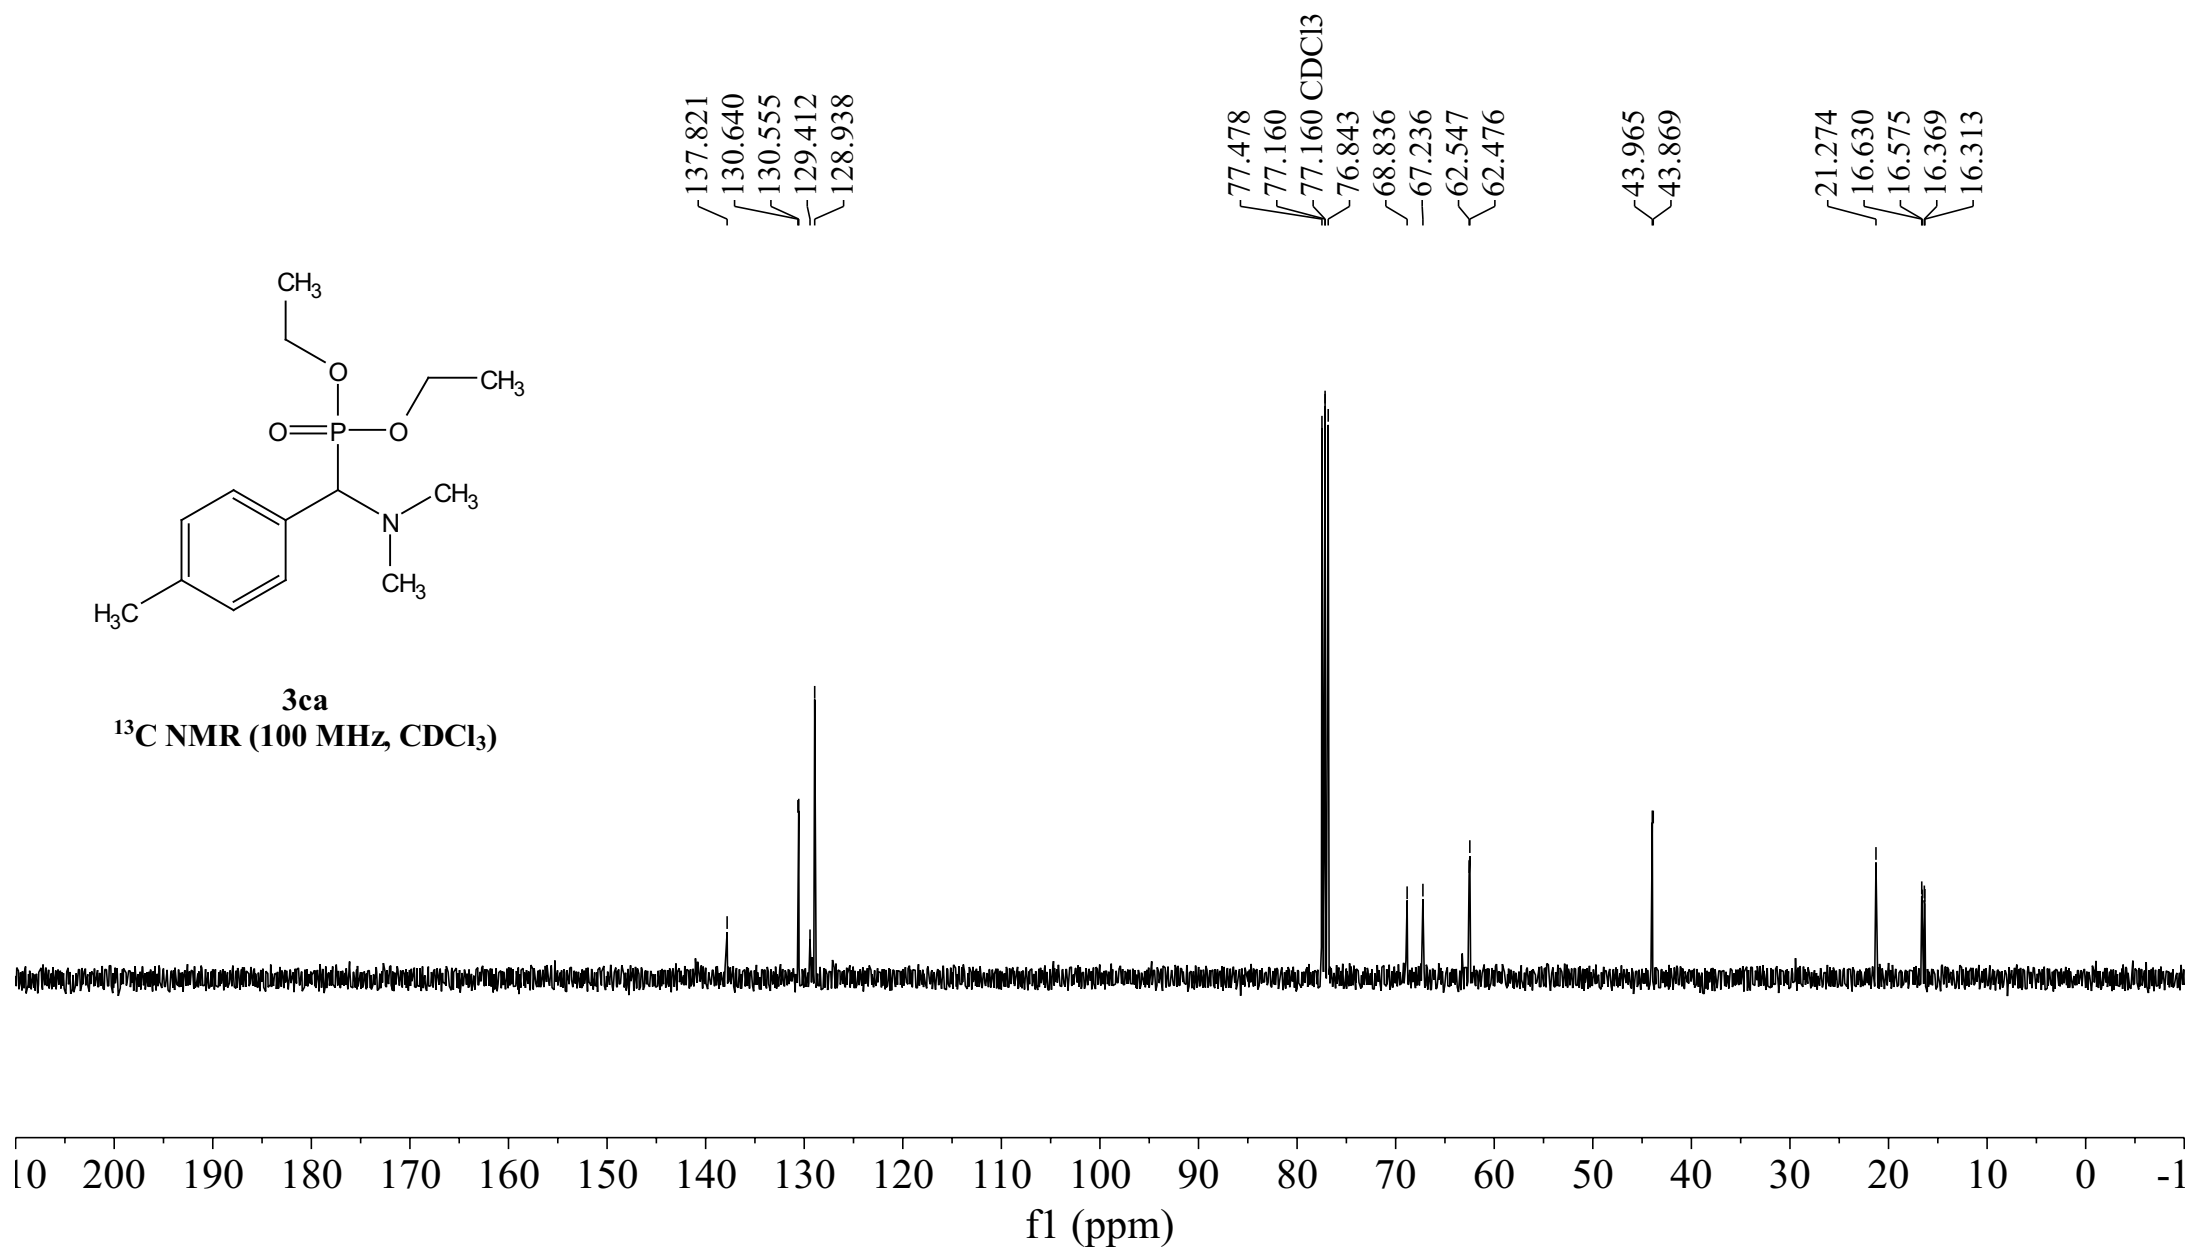

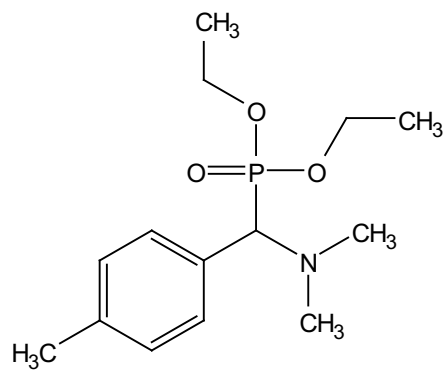

**3ca**

**<sup>31</sup>P NMR (162 MHz, CDCl<sub>3</sub>)**

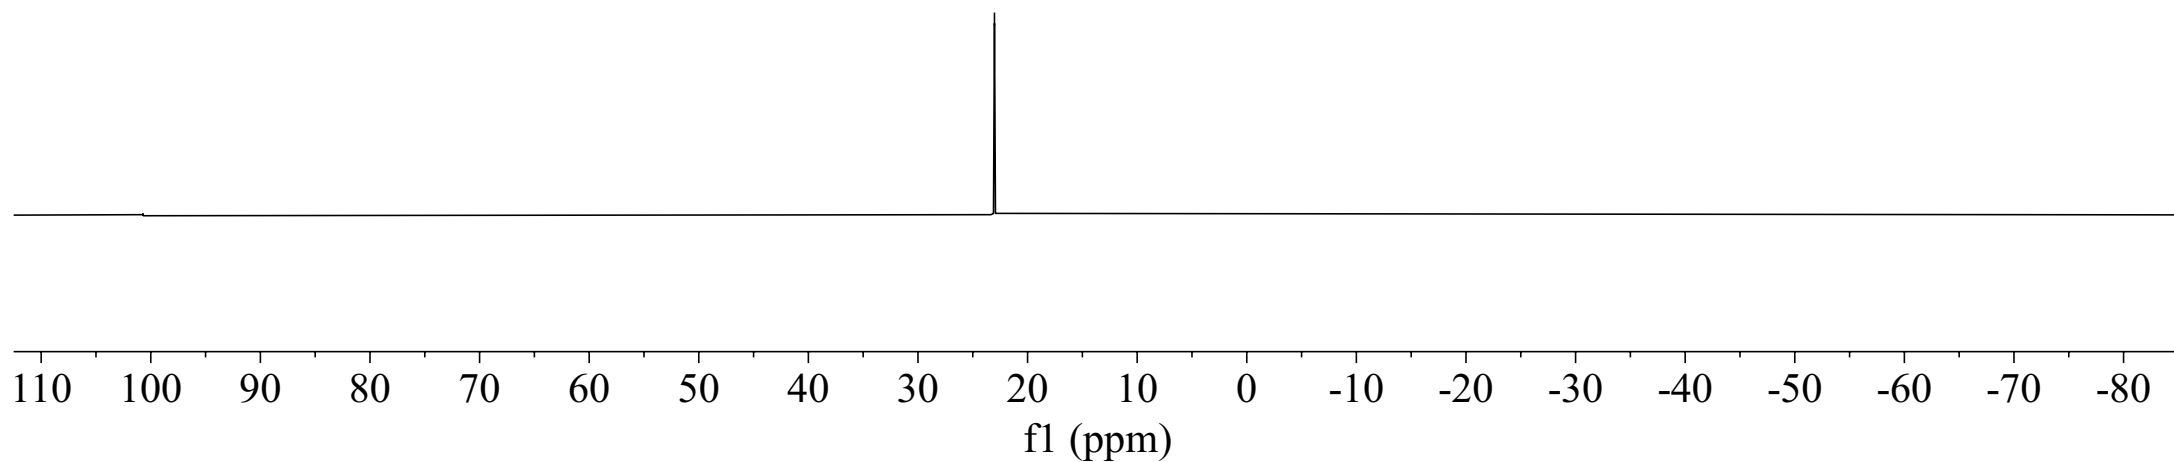

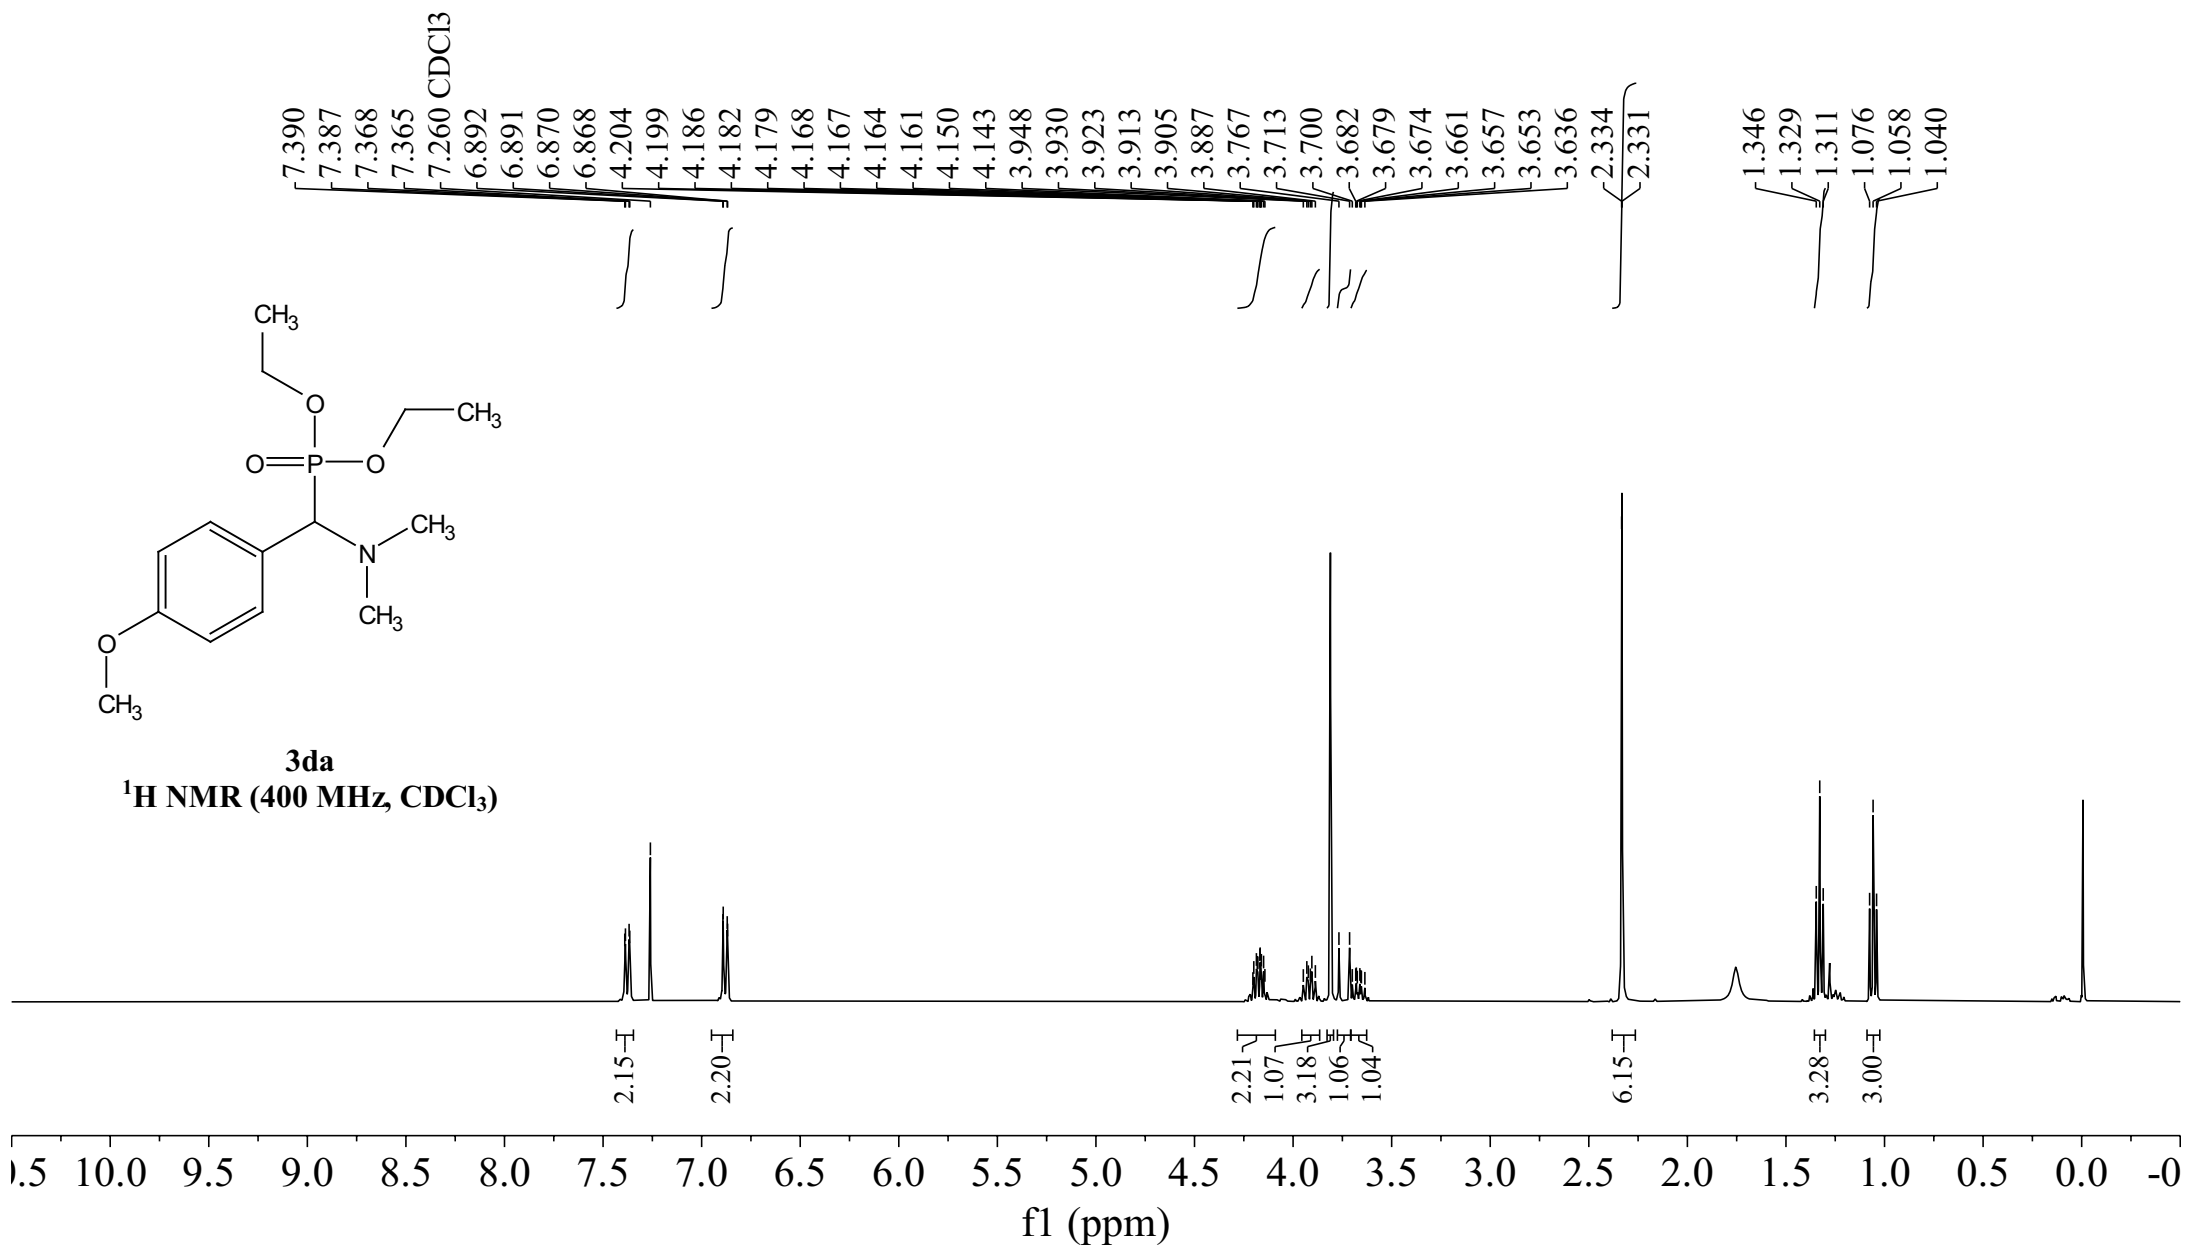

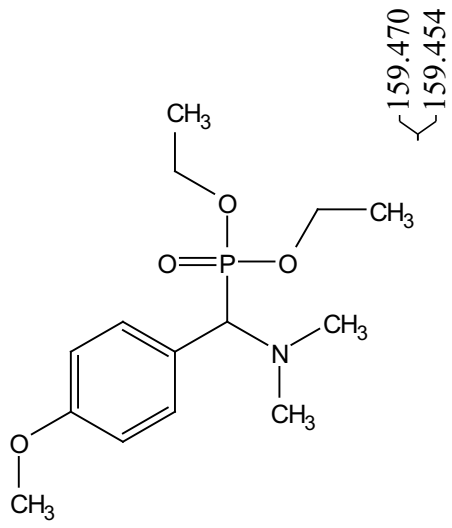

**3da**

<sup>13</sup>C NMR (100 MHz, CDCl<sub>3</sub>)

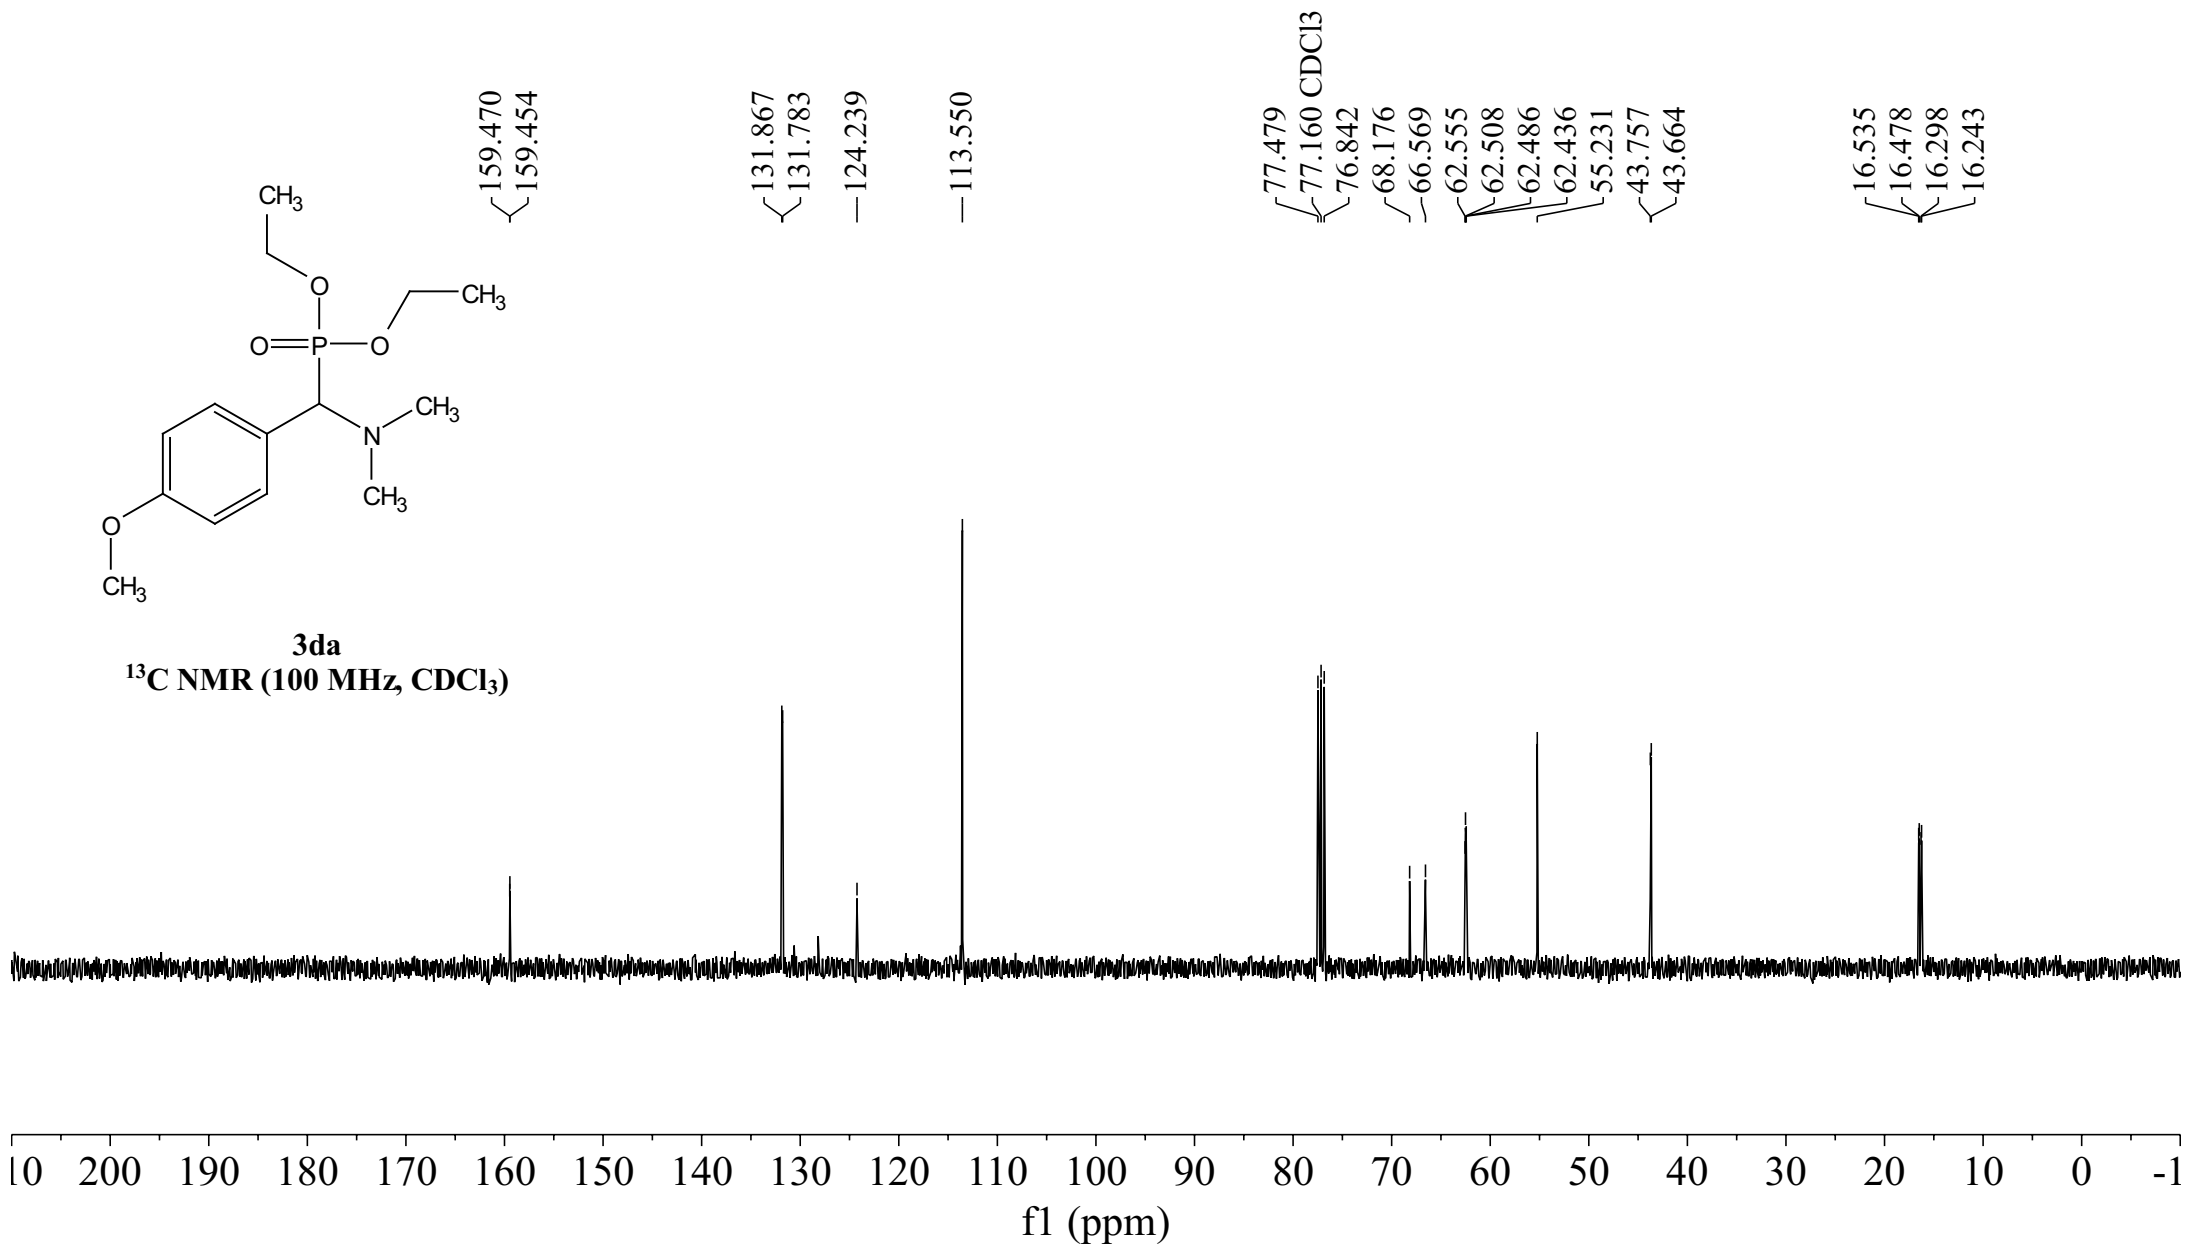

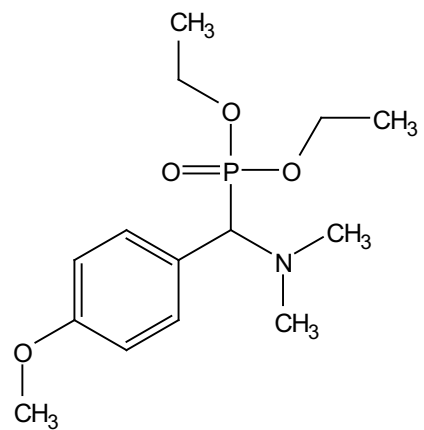

**3da**  
**<sup>31</sup>P NMR (162 MHz, CDCl<sub>3</sub>)**

—23.148

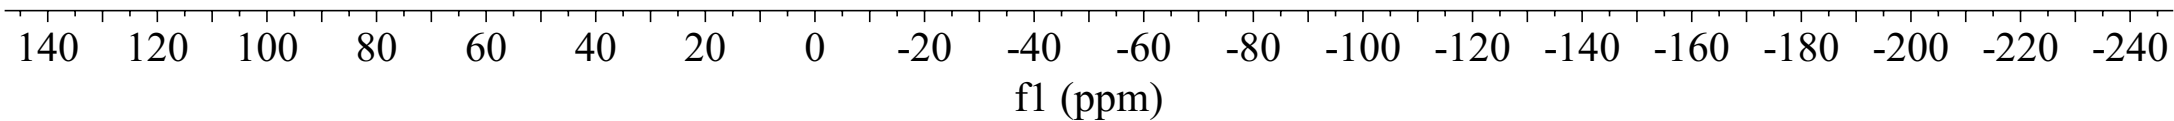

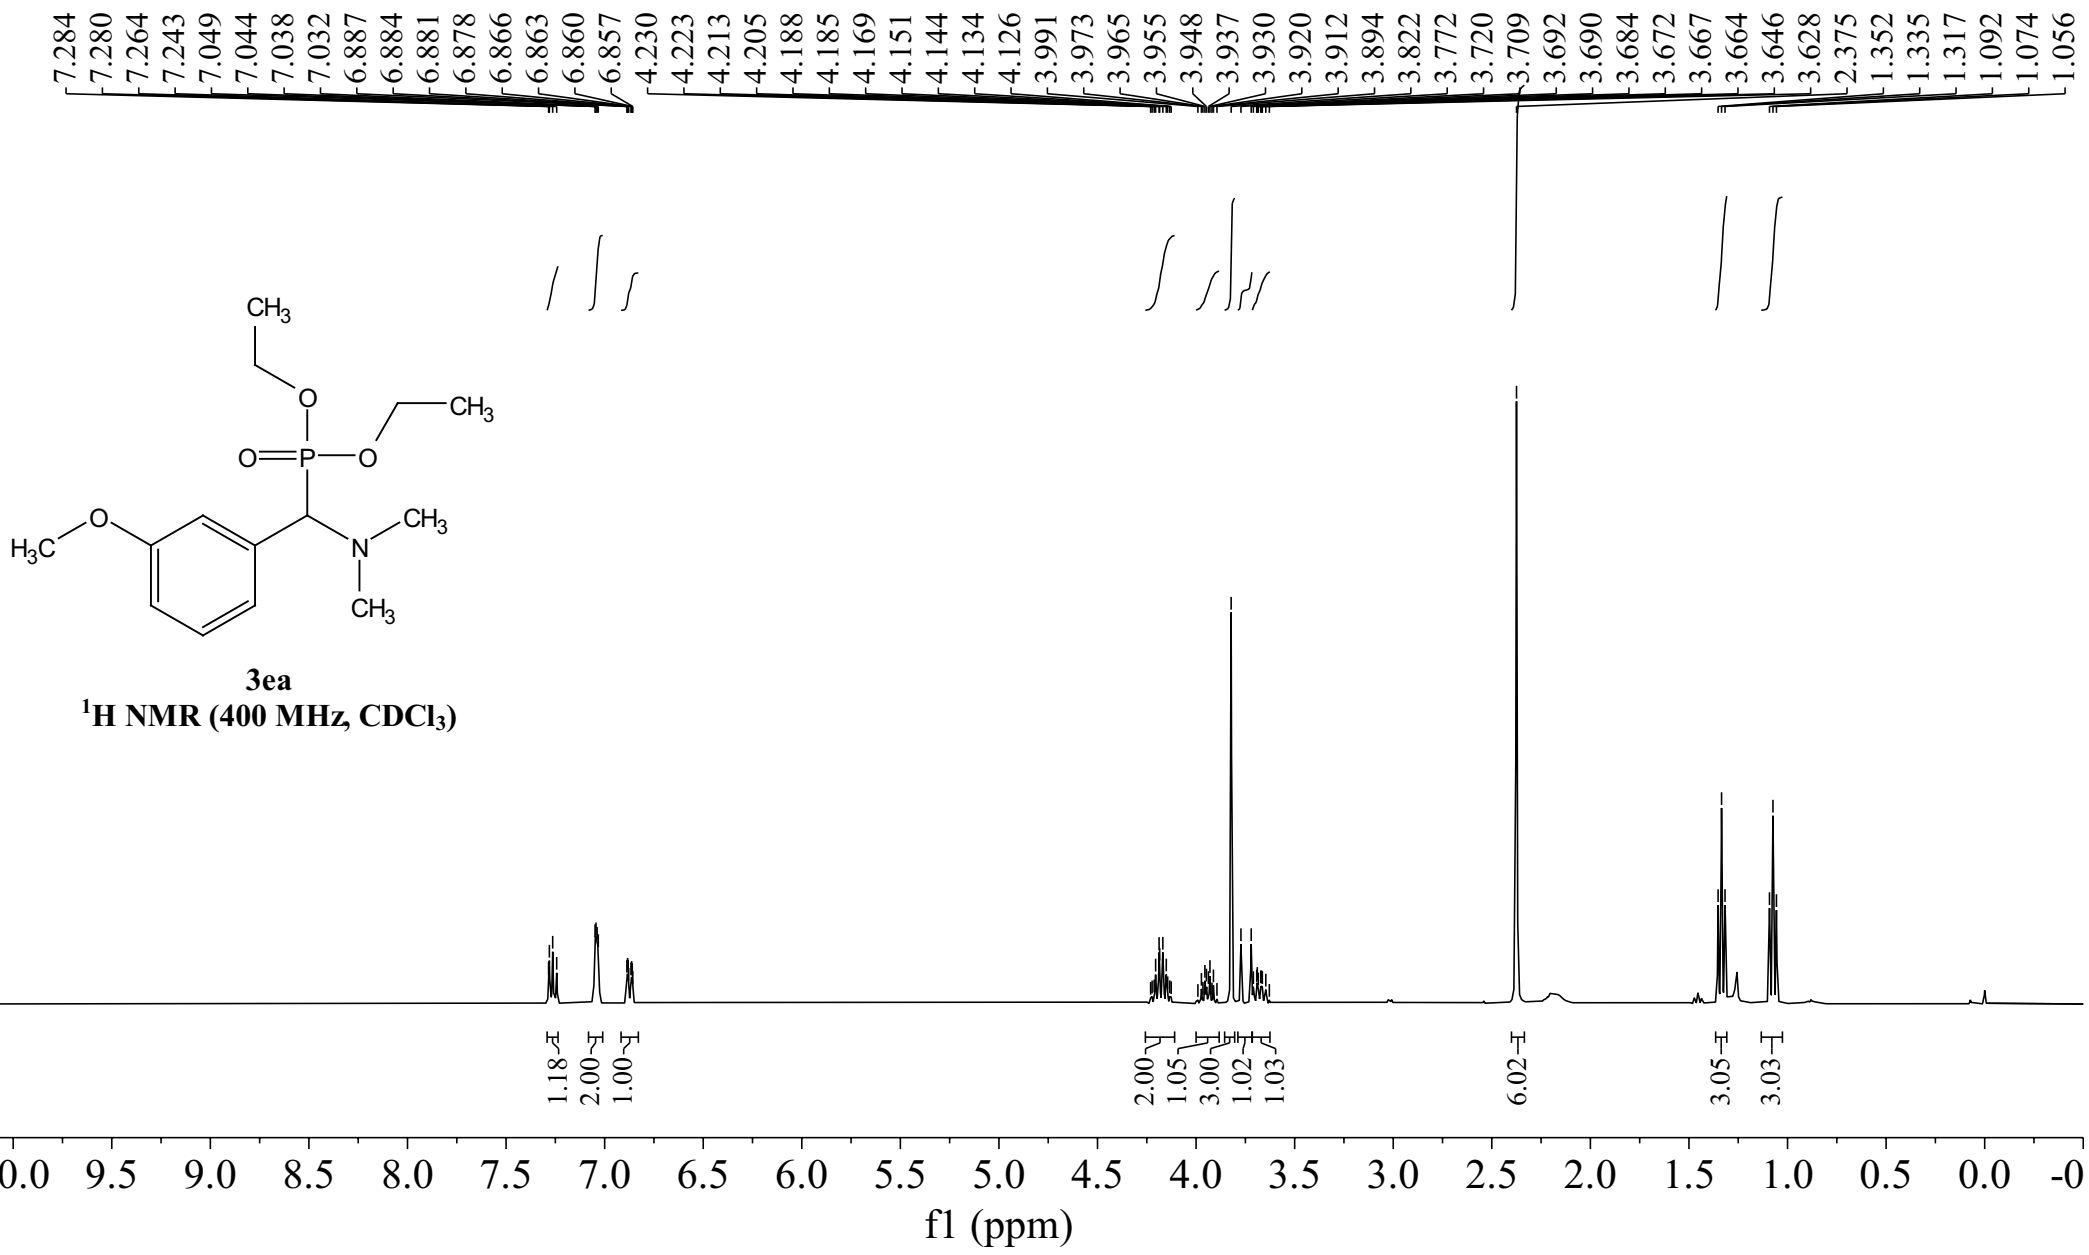



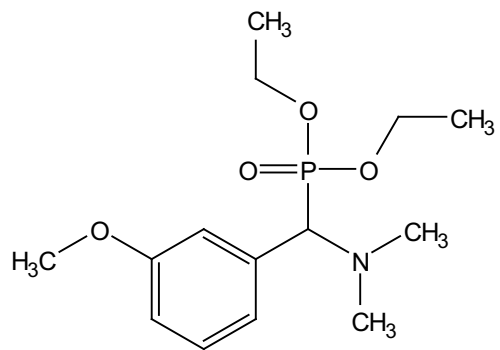

**3ea**

<sup>13</sup>C NMR (100 MHz, CDCl<sub>3</sub>)

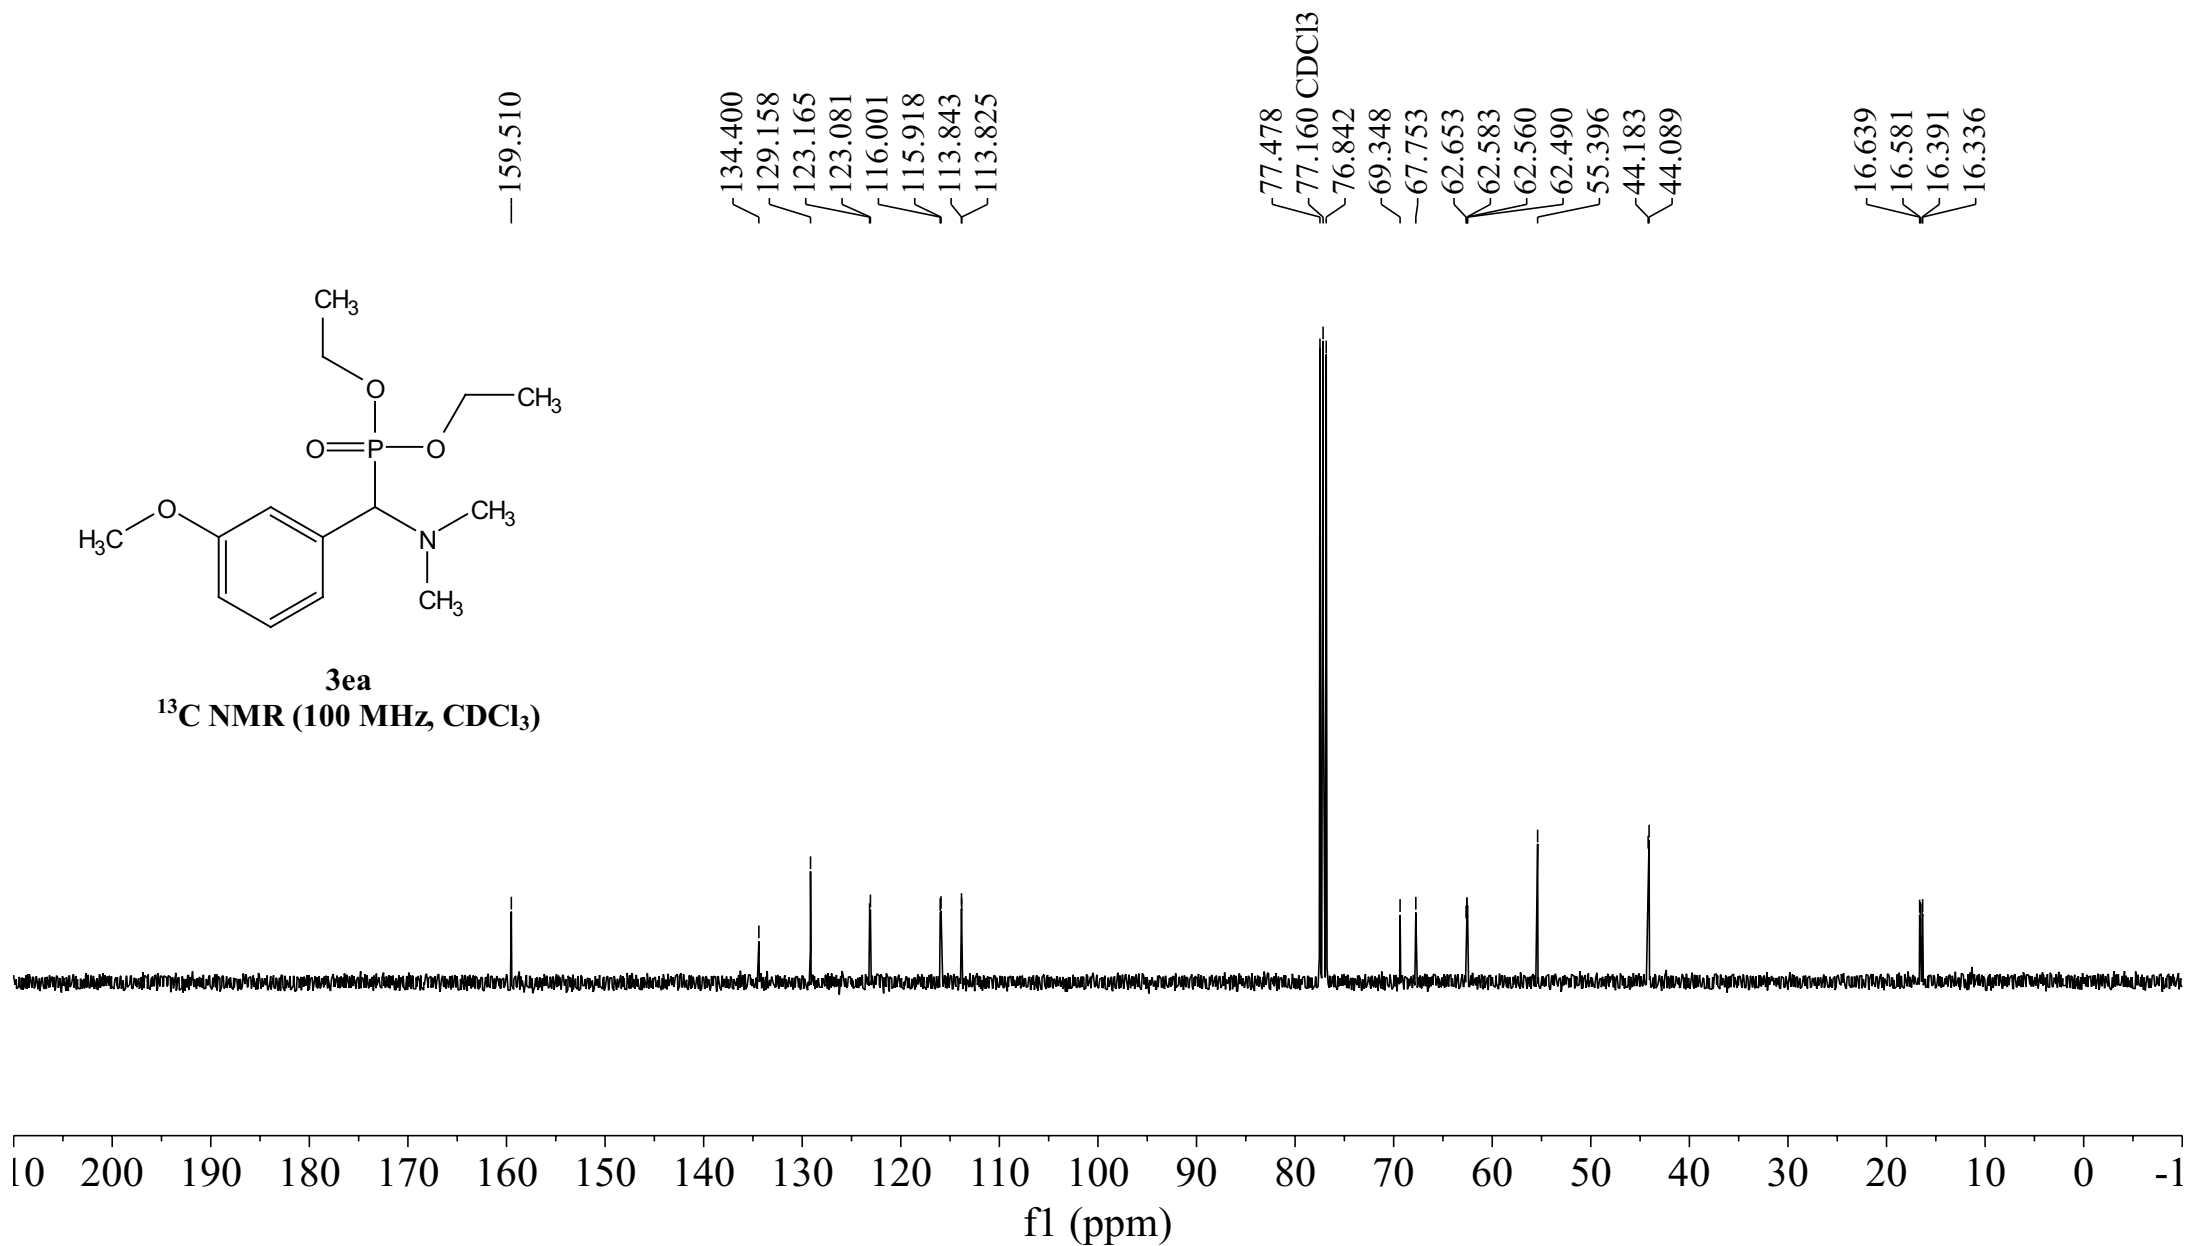

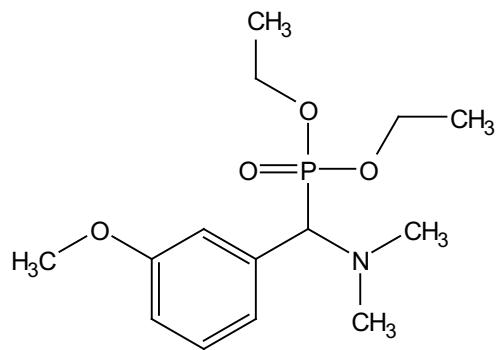

3ea

<sup>31</sup>P NMR (162 MHz, CDCl<sub>3</sub>)

—22.799



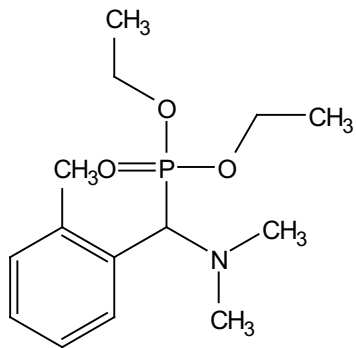

**3fa**

<sup>1</sup>H NMR (400 MHz, CDCl<sub>3</sub>)

7.742  
7.725  
7.260 CDCl<sub>3</sub>  
7.181  
7.174  
7.164  
7.158  
7.152  
7.147  
7.143  
4.175  
4.159  
4.156  
4.150  
4.138  
4.134  
4.130  
4.118  
4.111  
4.100  
4.093  
4.082  
4.075  
4.064  
4.057  
4.046  
4.039  
4.008  
3.960  
3.837  
3.819  
3.811  
3.802  
3.794  
3.776  
3.453  
3.438  
3.435  
3.428  
3.424  
3.421  
3.418  
3.408  
3.405  
3.390  
3.384  
2.370  
2.344  
1.317  
1.300  
1.282  
0.984  
0.967  
0.949

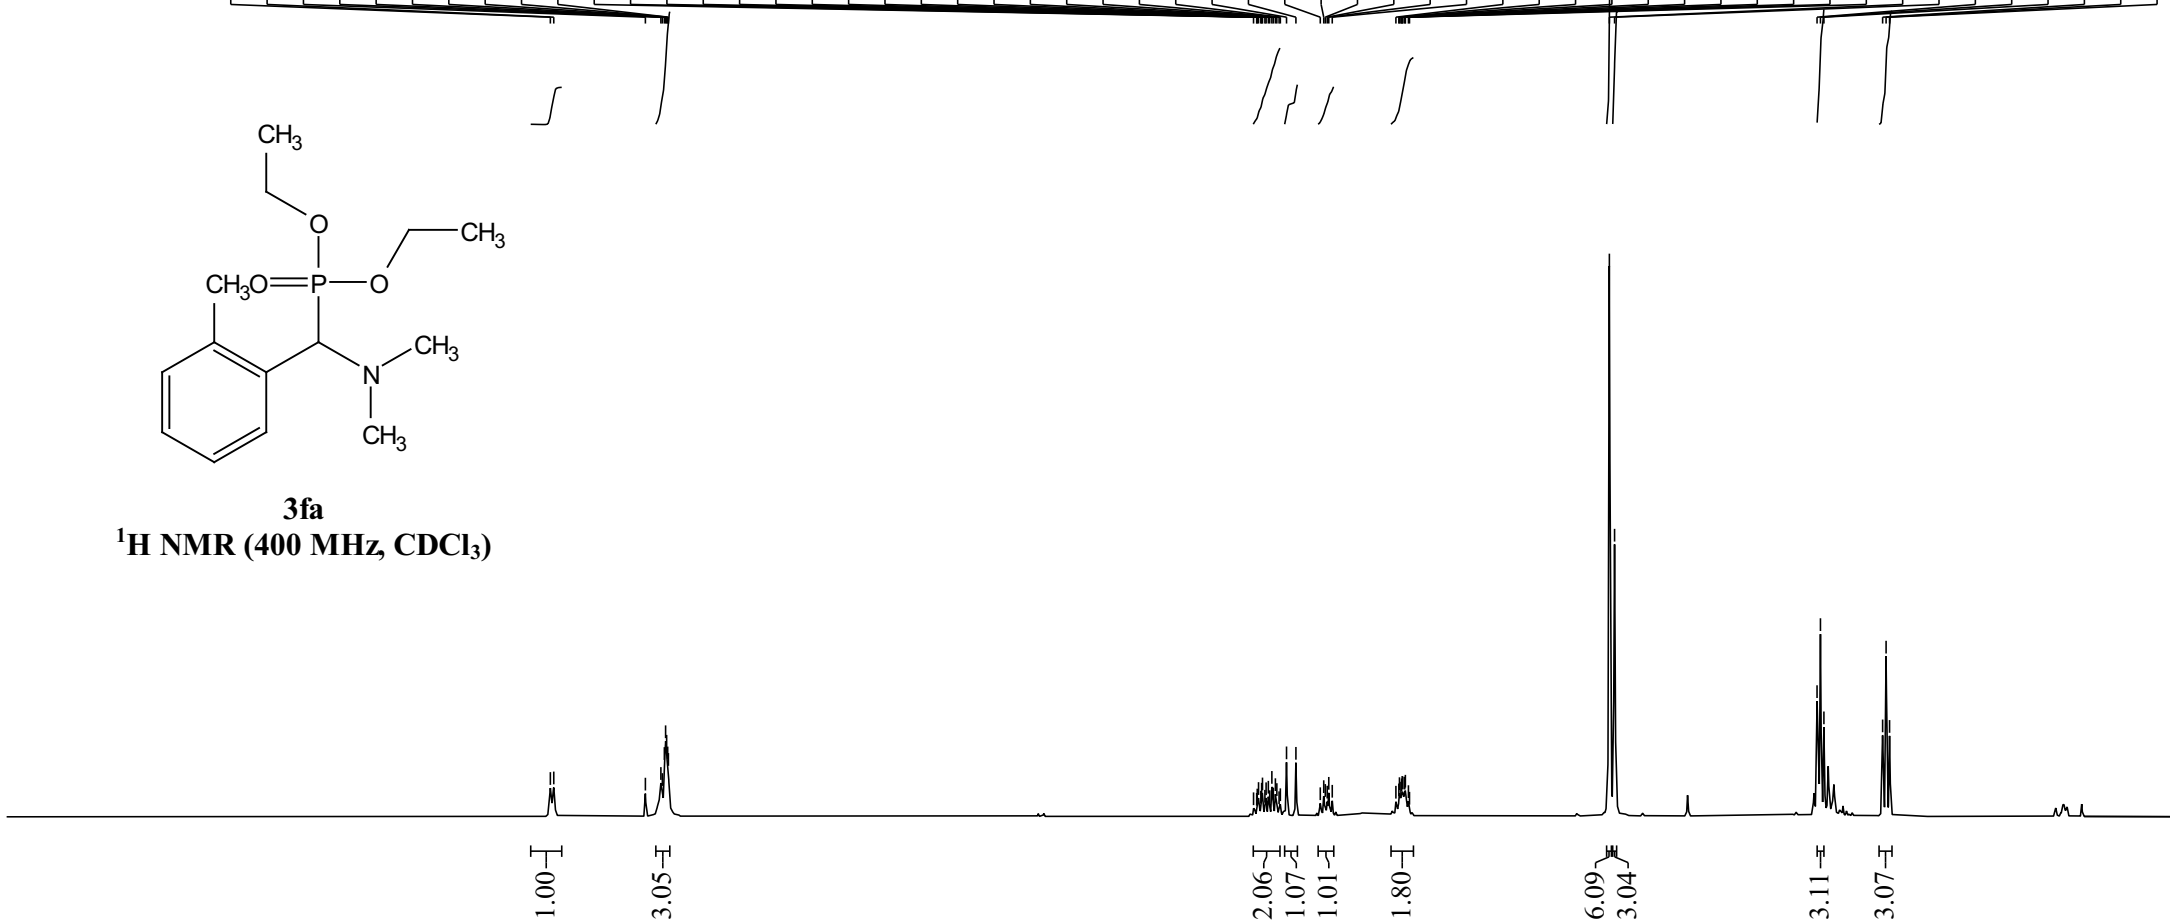

10.0 9.5 9.0 8.5 8.0 7.5 7.0 6.5 6.0 5.5 5.0 4.5 4.0 3.5 3.0 2.5 2.0 1.5 1.0 0.5 0.0 -0

f1 (ppm)

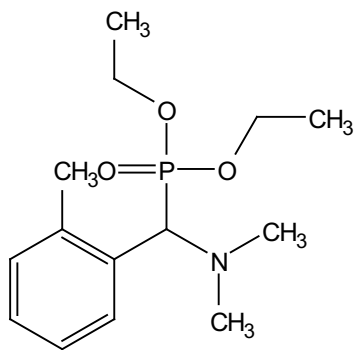

**3fa**

<sup>13</sup>C NMR (100 MHz, CDCl<sub>3</sub>)

137.599  
137.500  
133.062  
130.531  
130.201  
130.159  
127.811  
127.787  
125.967  
125.943

77.478  
77.160 CDCl<sub>3</sub>  
77.160  
76.843  
64.624  
63.068  
62.787  
62.717  
62.043  
61.968  
44.638  
44.544

20.294  
16.586  
16.526  
16.294  
16.238

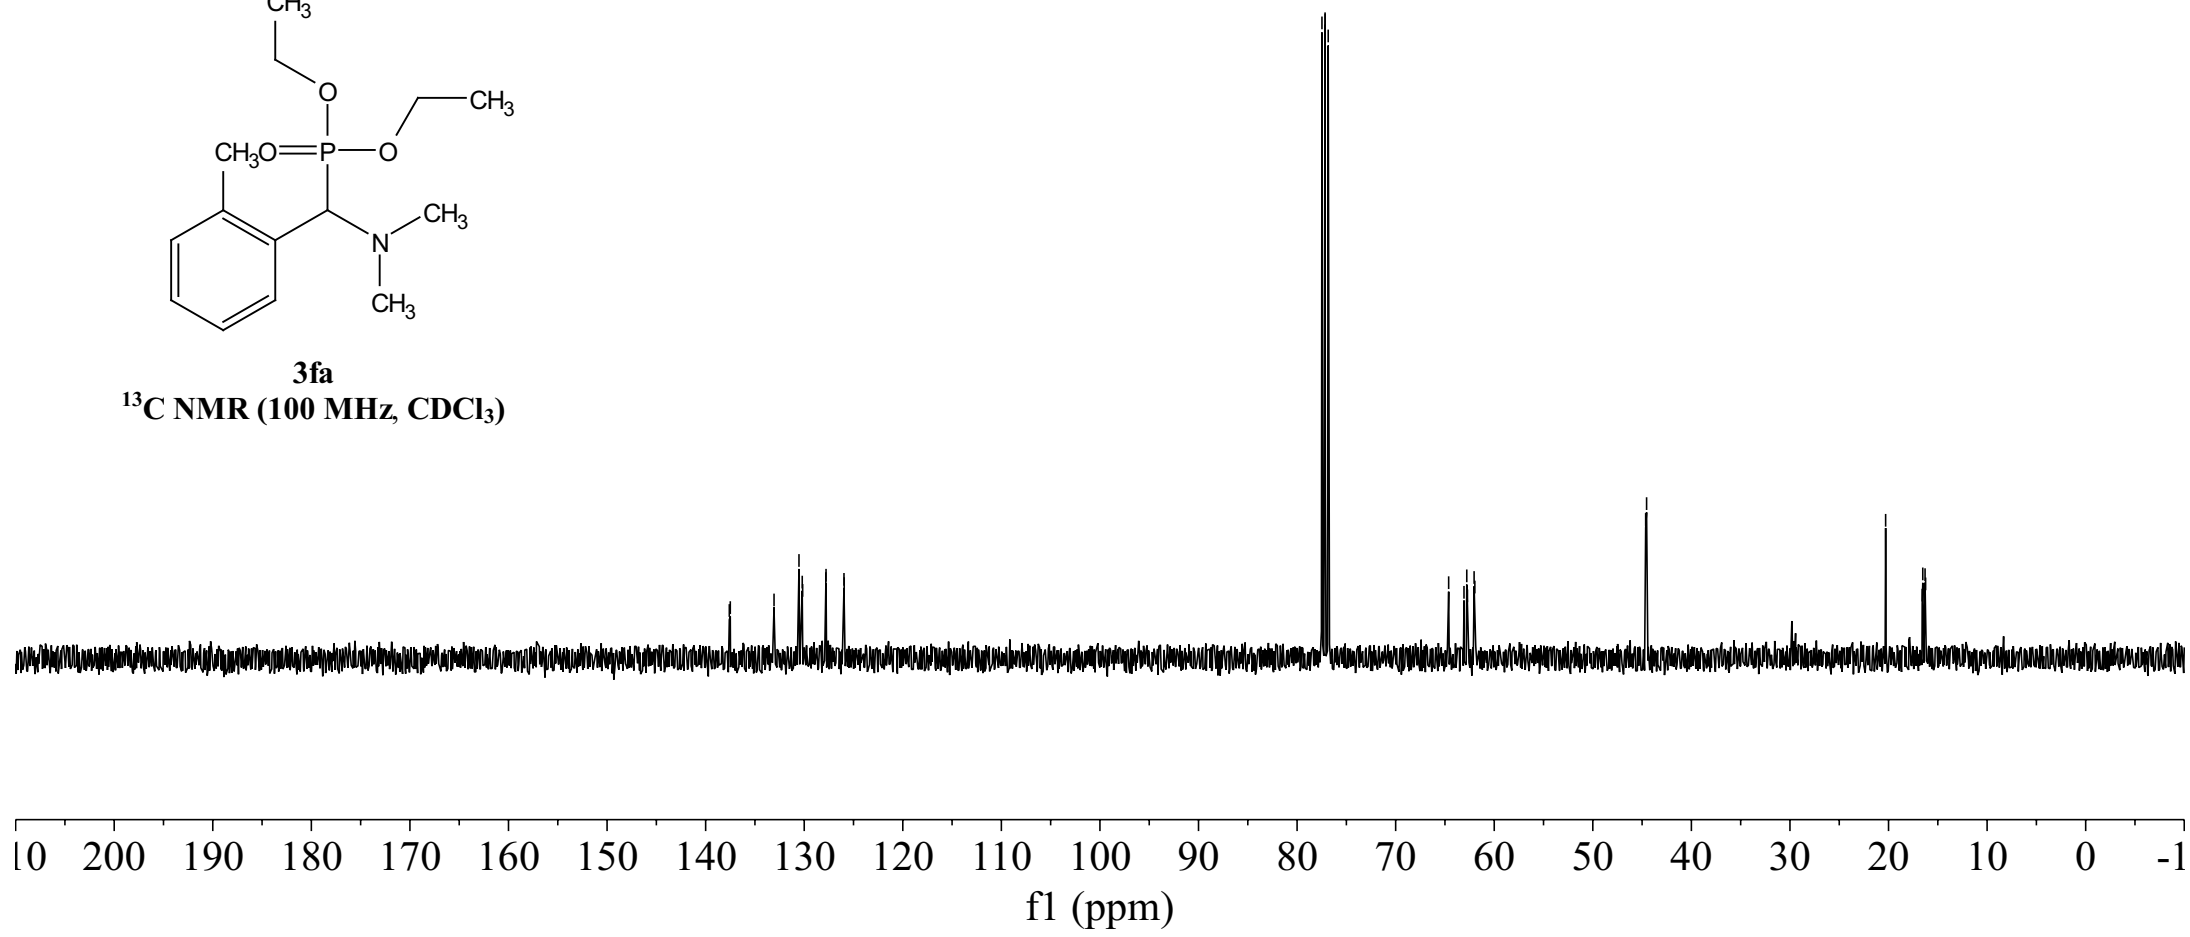

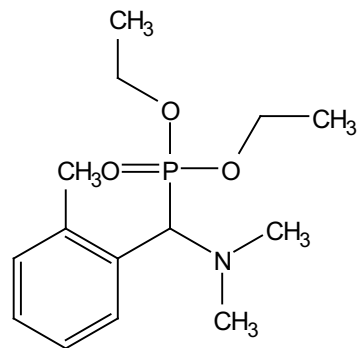

**3fa**

<sup>31</sup>P NMR (162 MHz, CDCl<sub>3</sub>)

—23.883

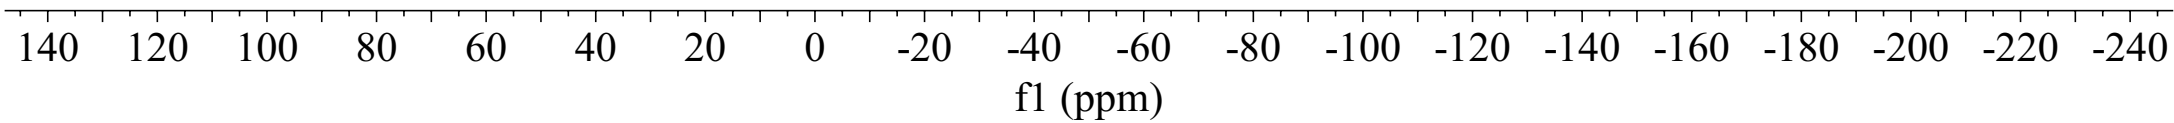

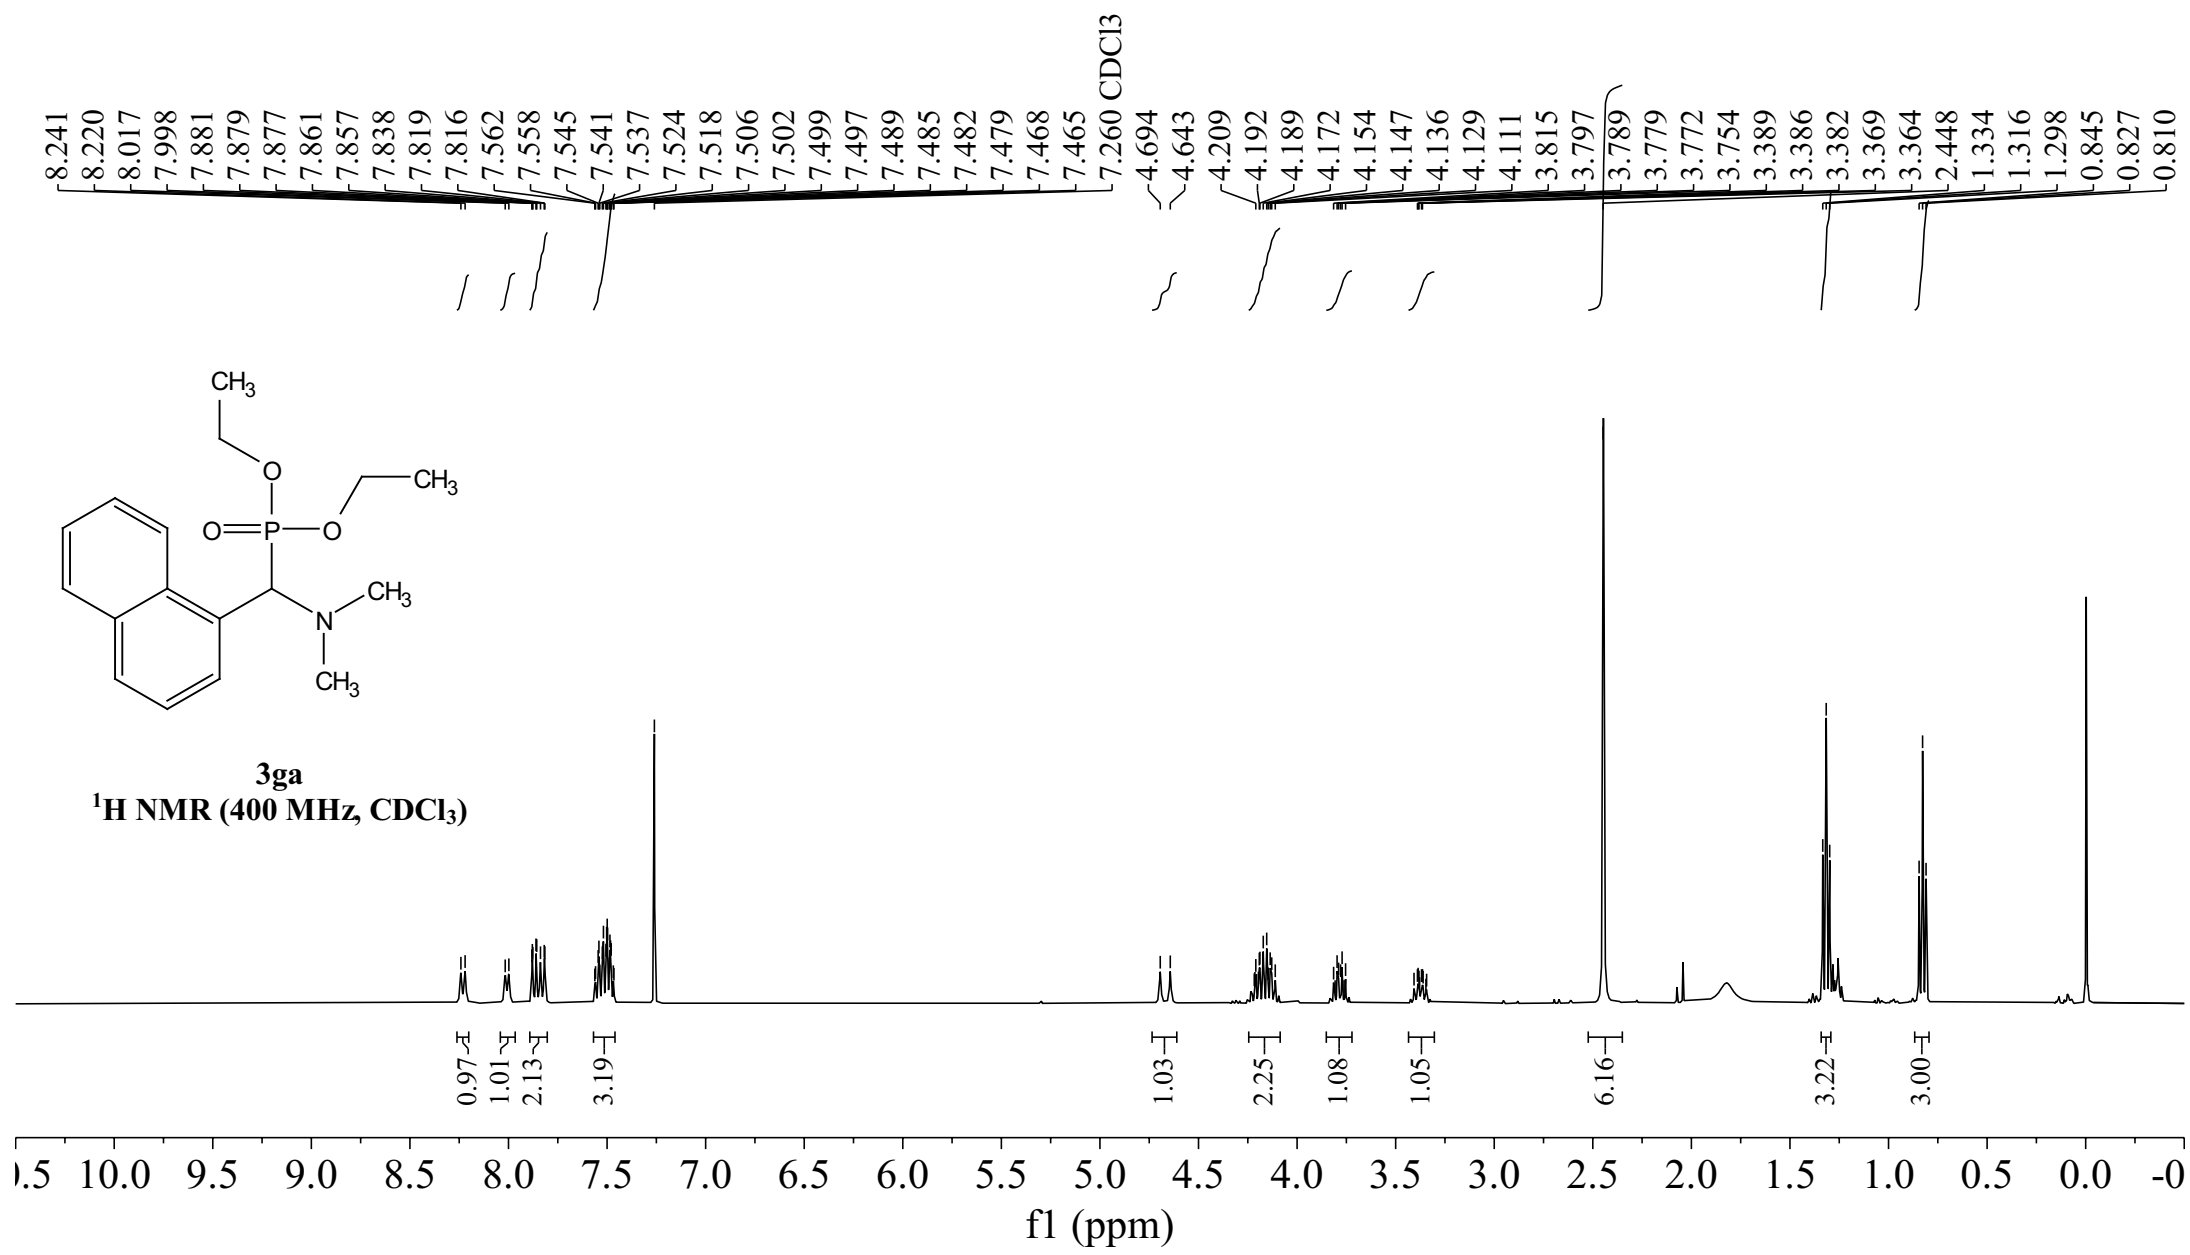

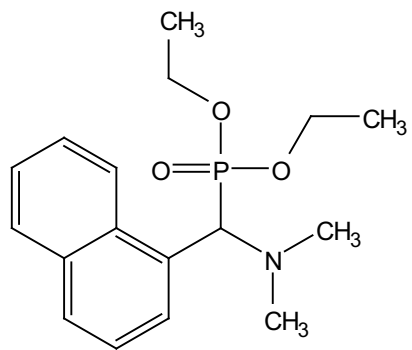

**3ga**  
<sup>13</sup>C NMR (100 MHz, CDCl<sub>3</sub>)

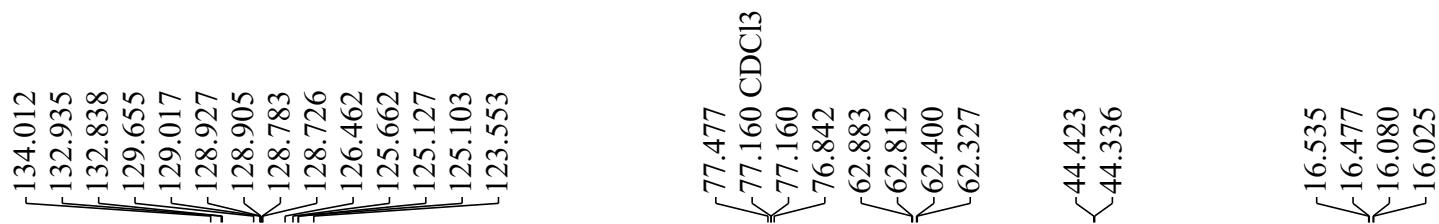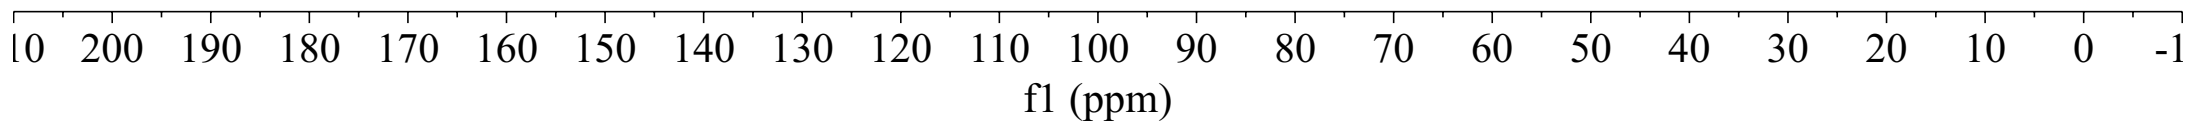

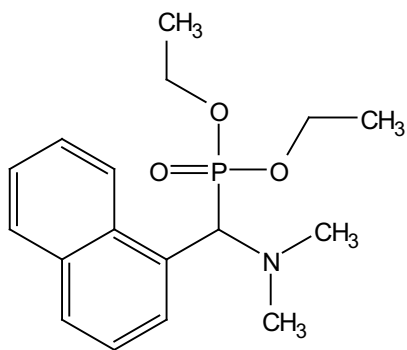

**3ga**  
**<sup>31</sup>P NMR (162 MHz, CDCl<sub>3</sub>)**

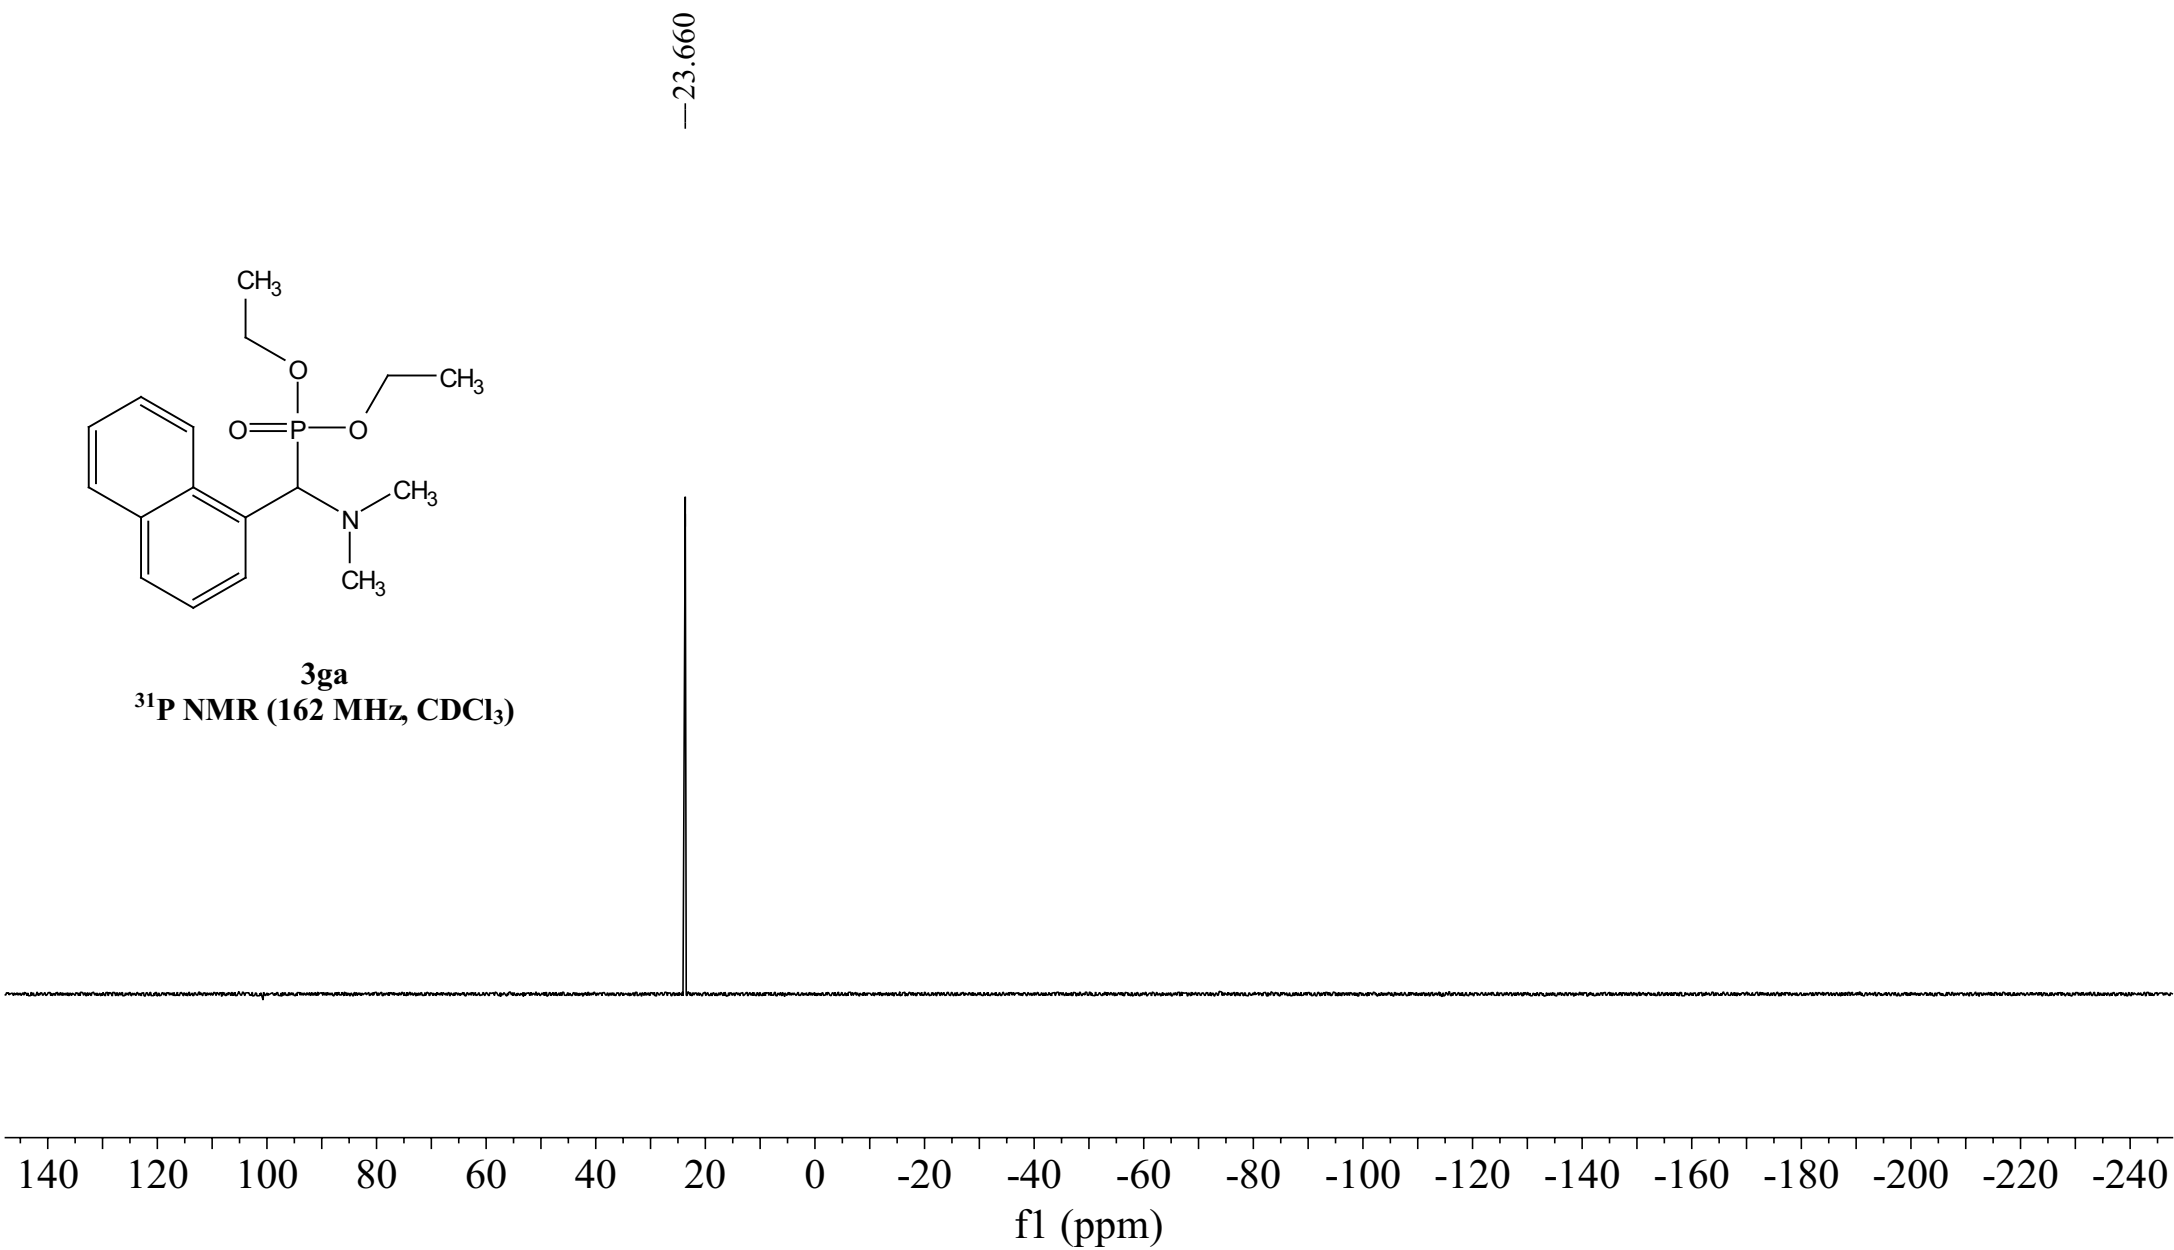



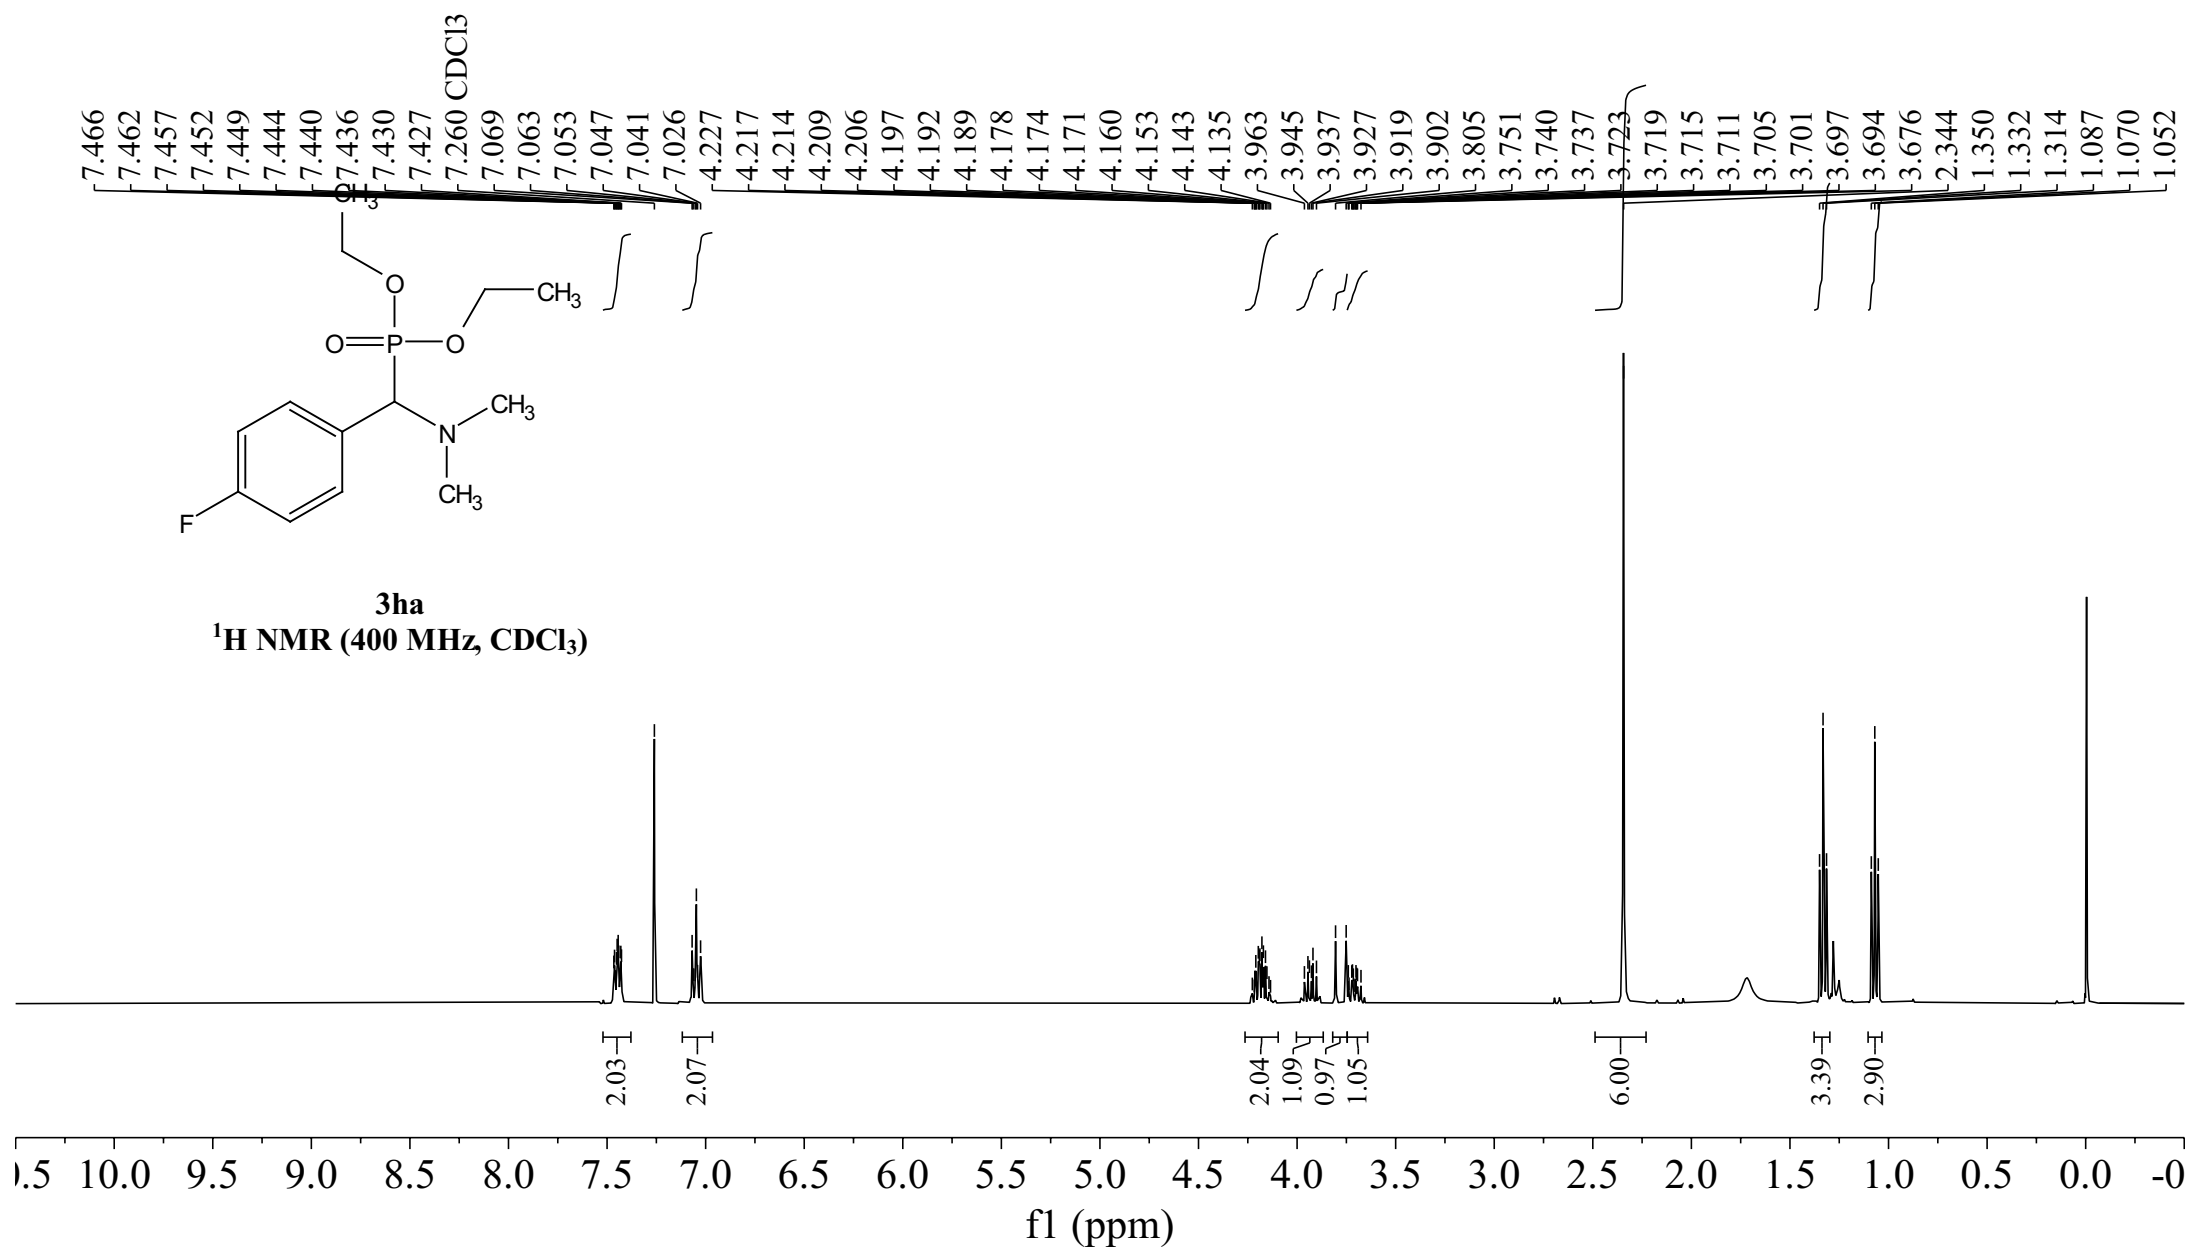

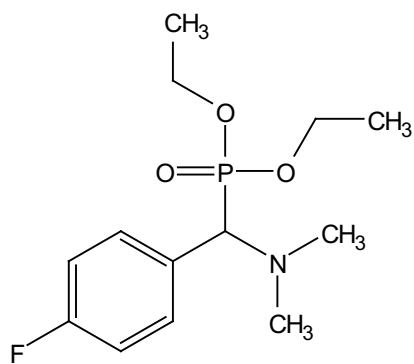

3ha

<sup>13</sup>C NMR (100 MHz, CDCl<sub>3</sub>)

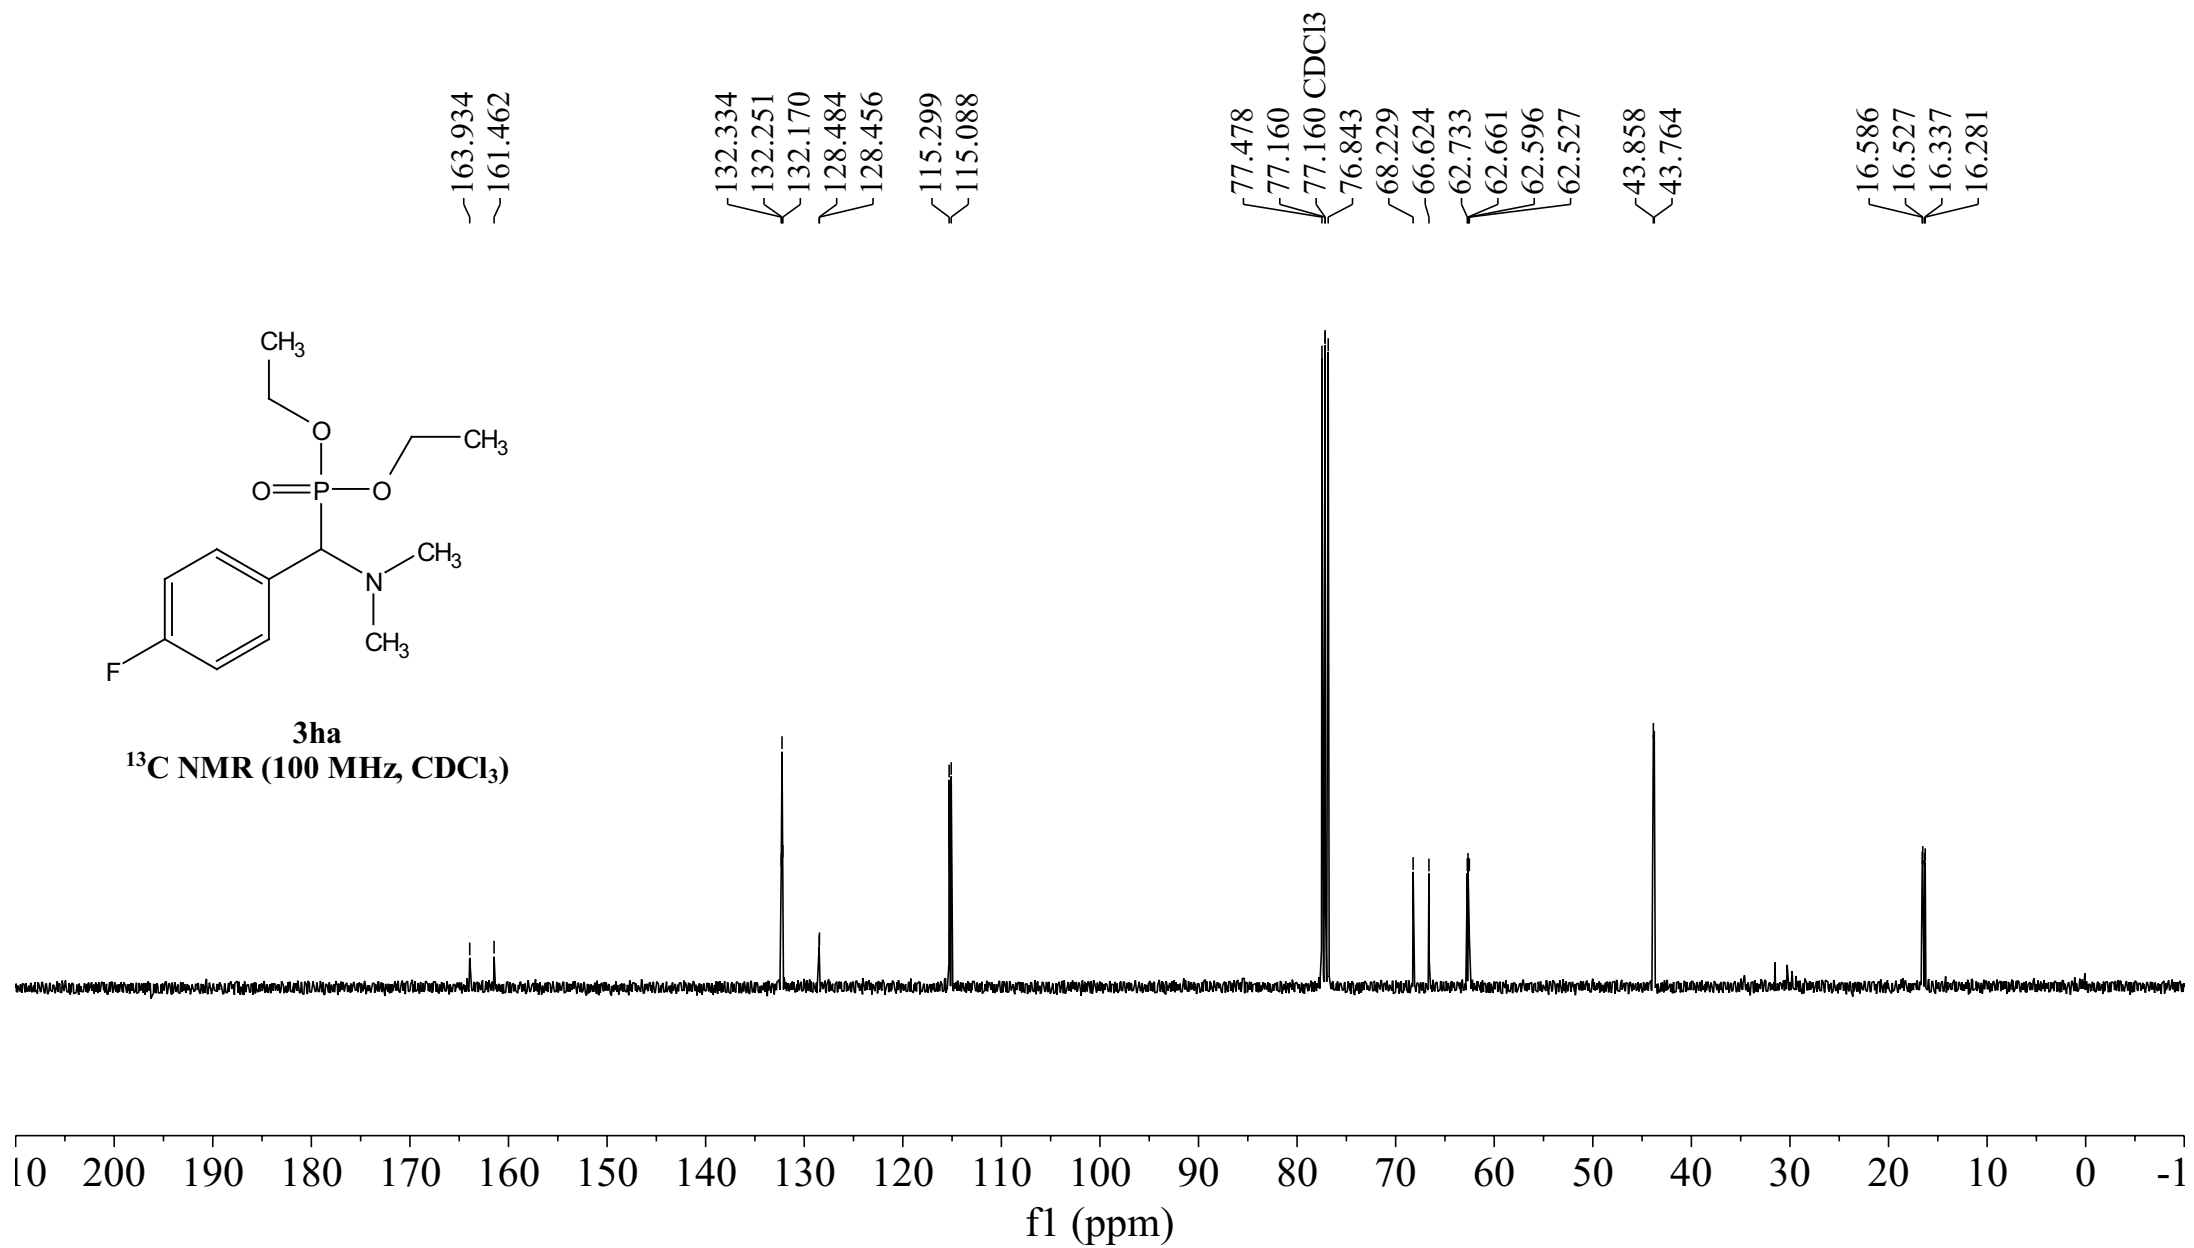

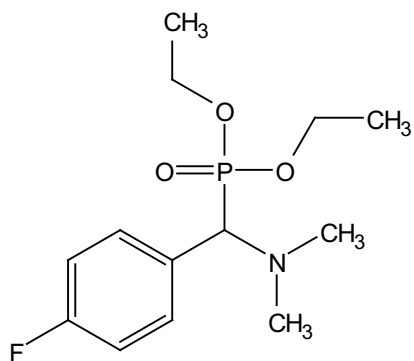

3ha

<sup>31</sup>P NMR (162 MHz, CDCl<sub>3</sub>)

—22.470

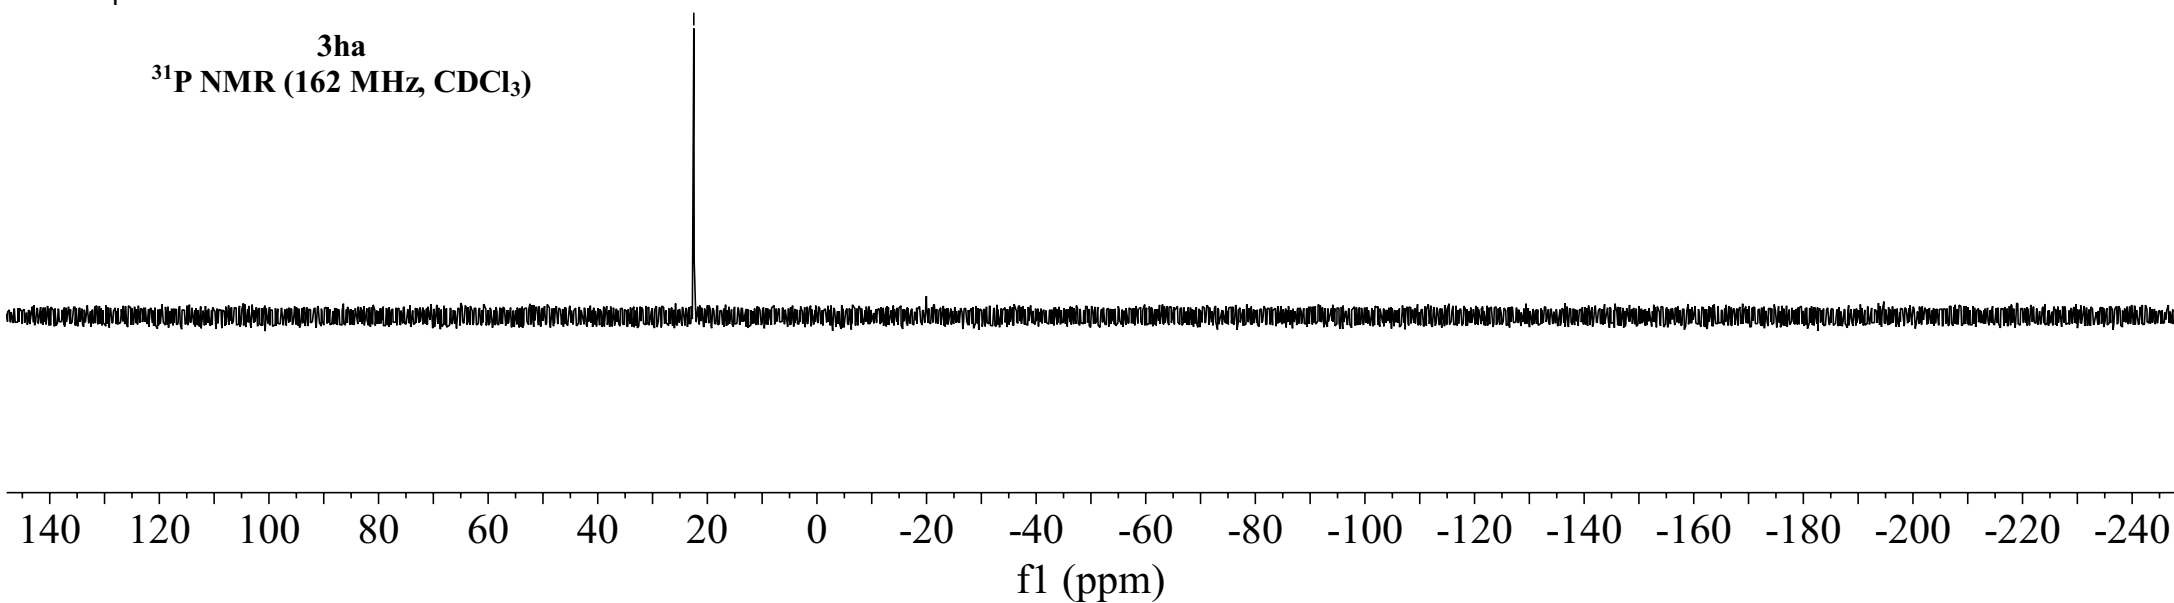

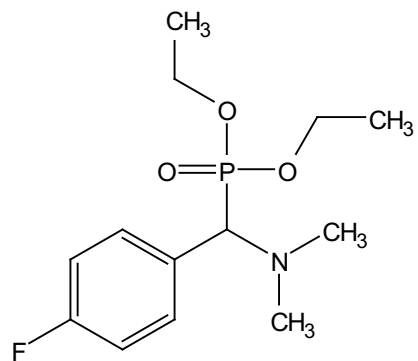

**3ha**

<sup>19</sup>F NMR (376 MHz, CDCl<sub>3</sub>)

--114.115

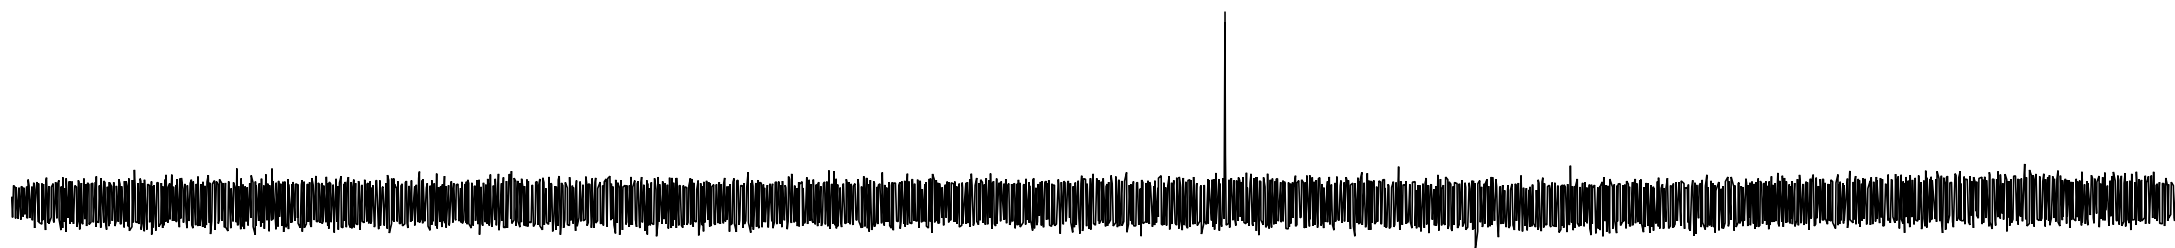

10 0 -10 -20 -30 -40 -50 -60 -70 -80 -90 -100 -110 -120 -130 -140 -150 -160 -170 -180 -190 -200 -210

f1 (ppm)

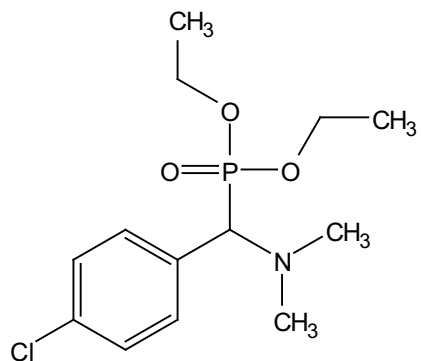

**3ia**  
 $^1\text{H NMR}$  (400 MHz,  $\text{CDCl}_3$ )

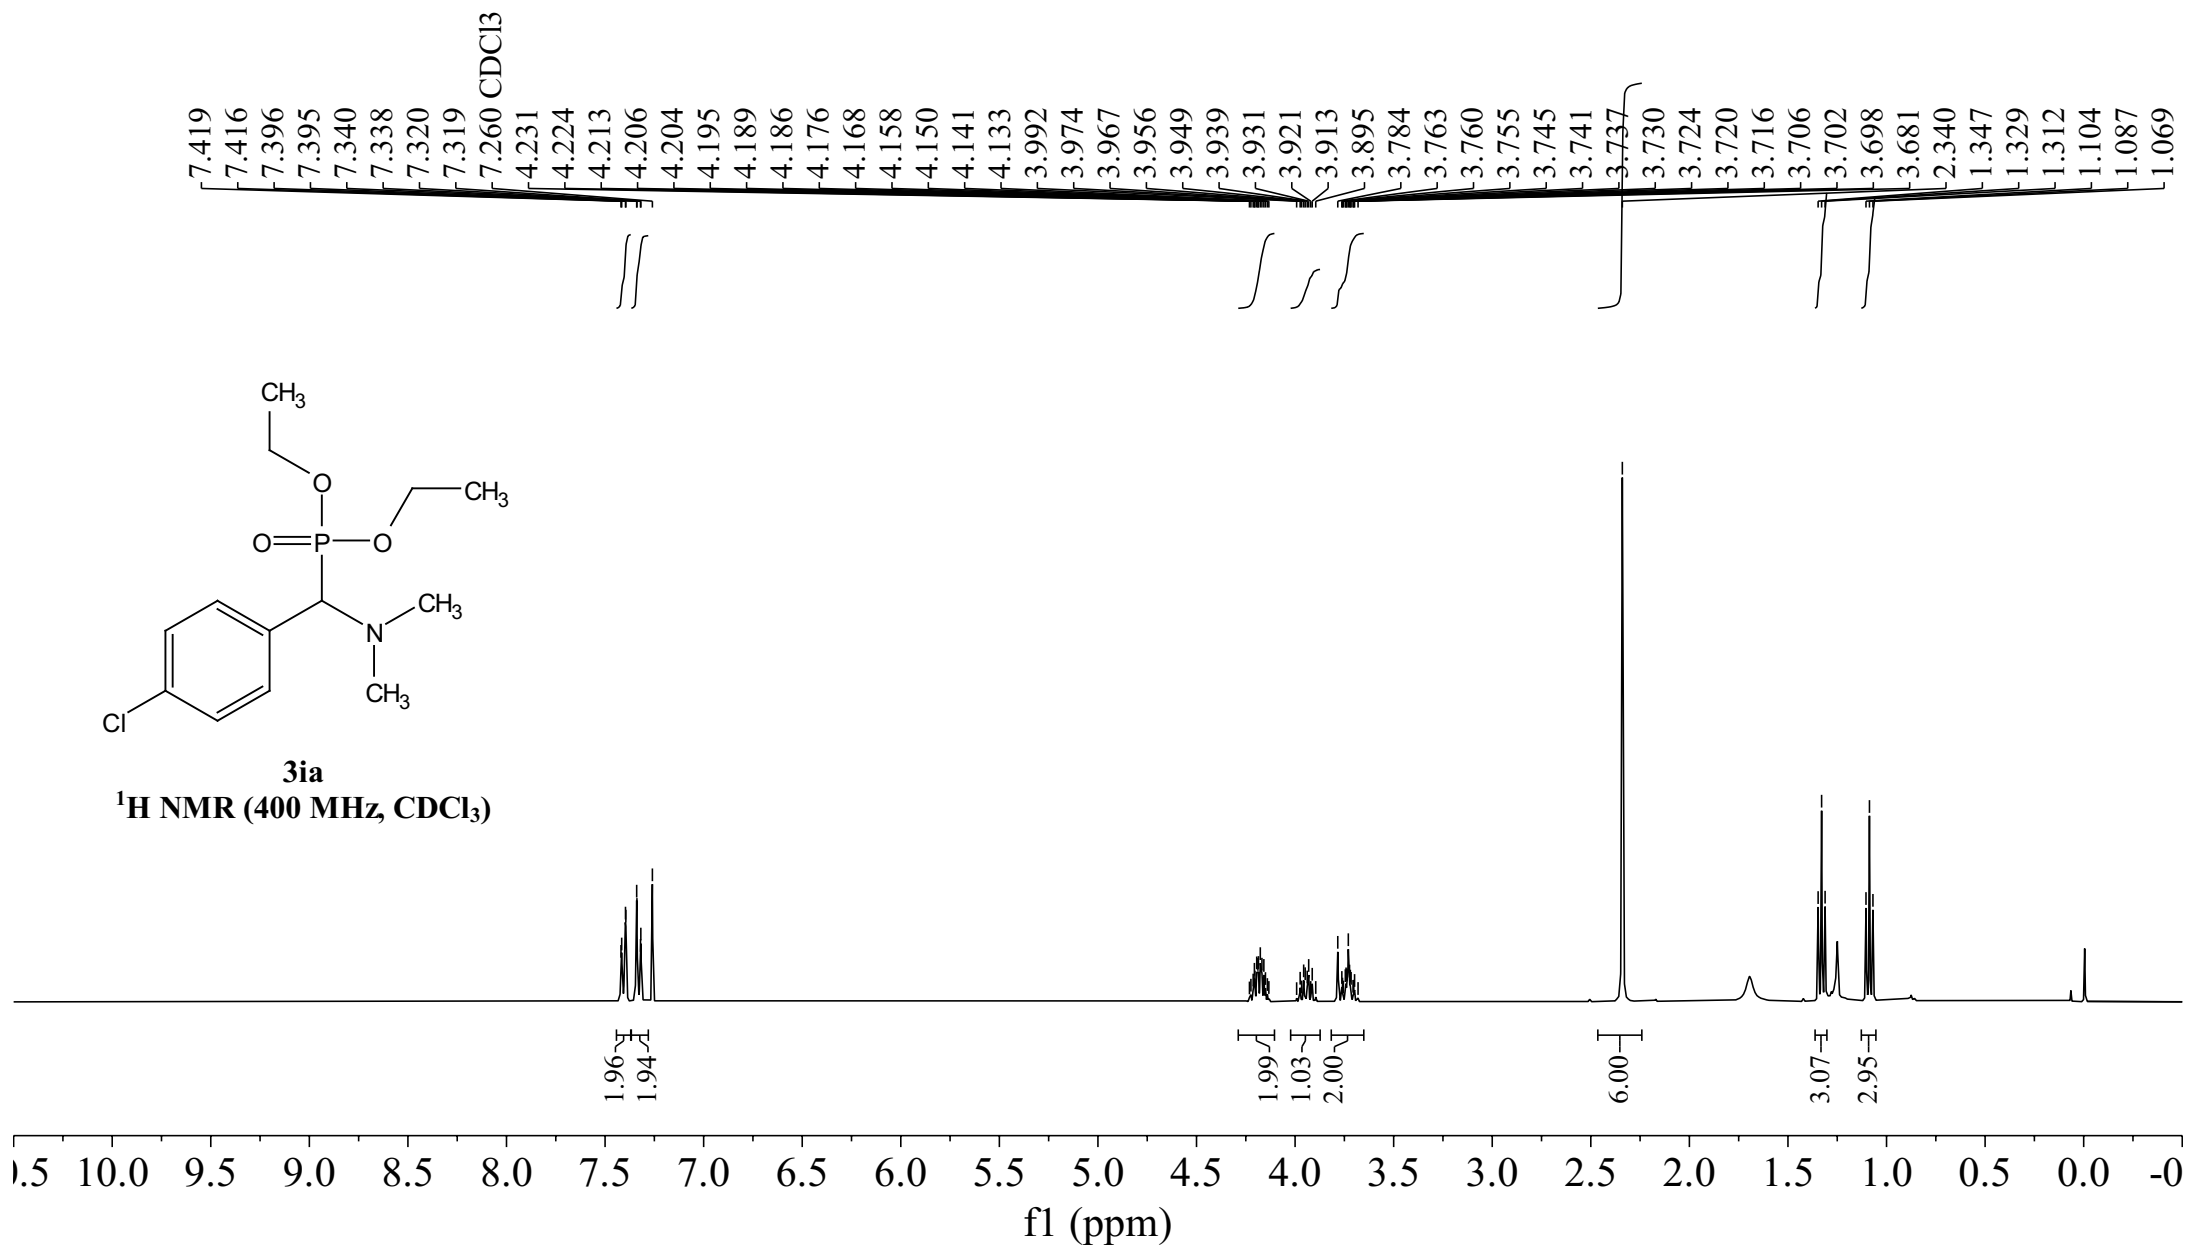

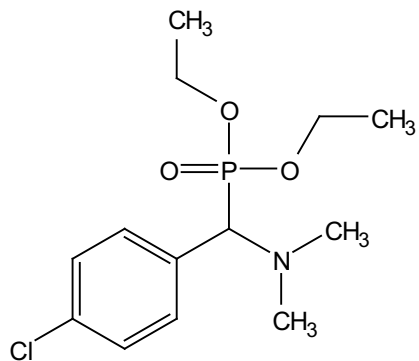

3ia

$^{13}\text{C}$  NMR (150 MHz,  $\text{CDCl}_3$ )

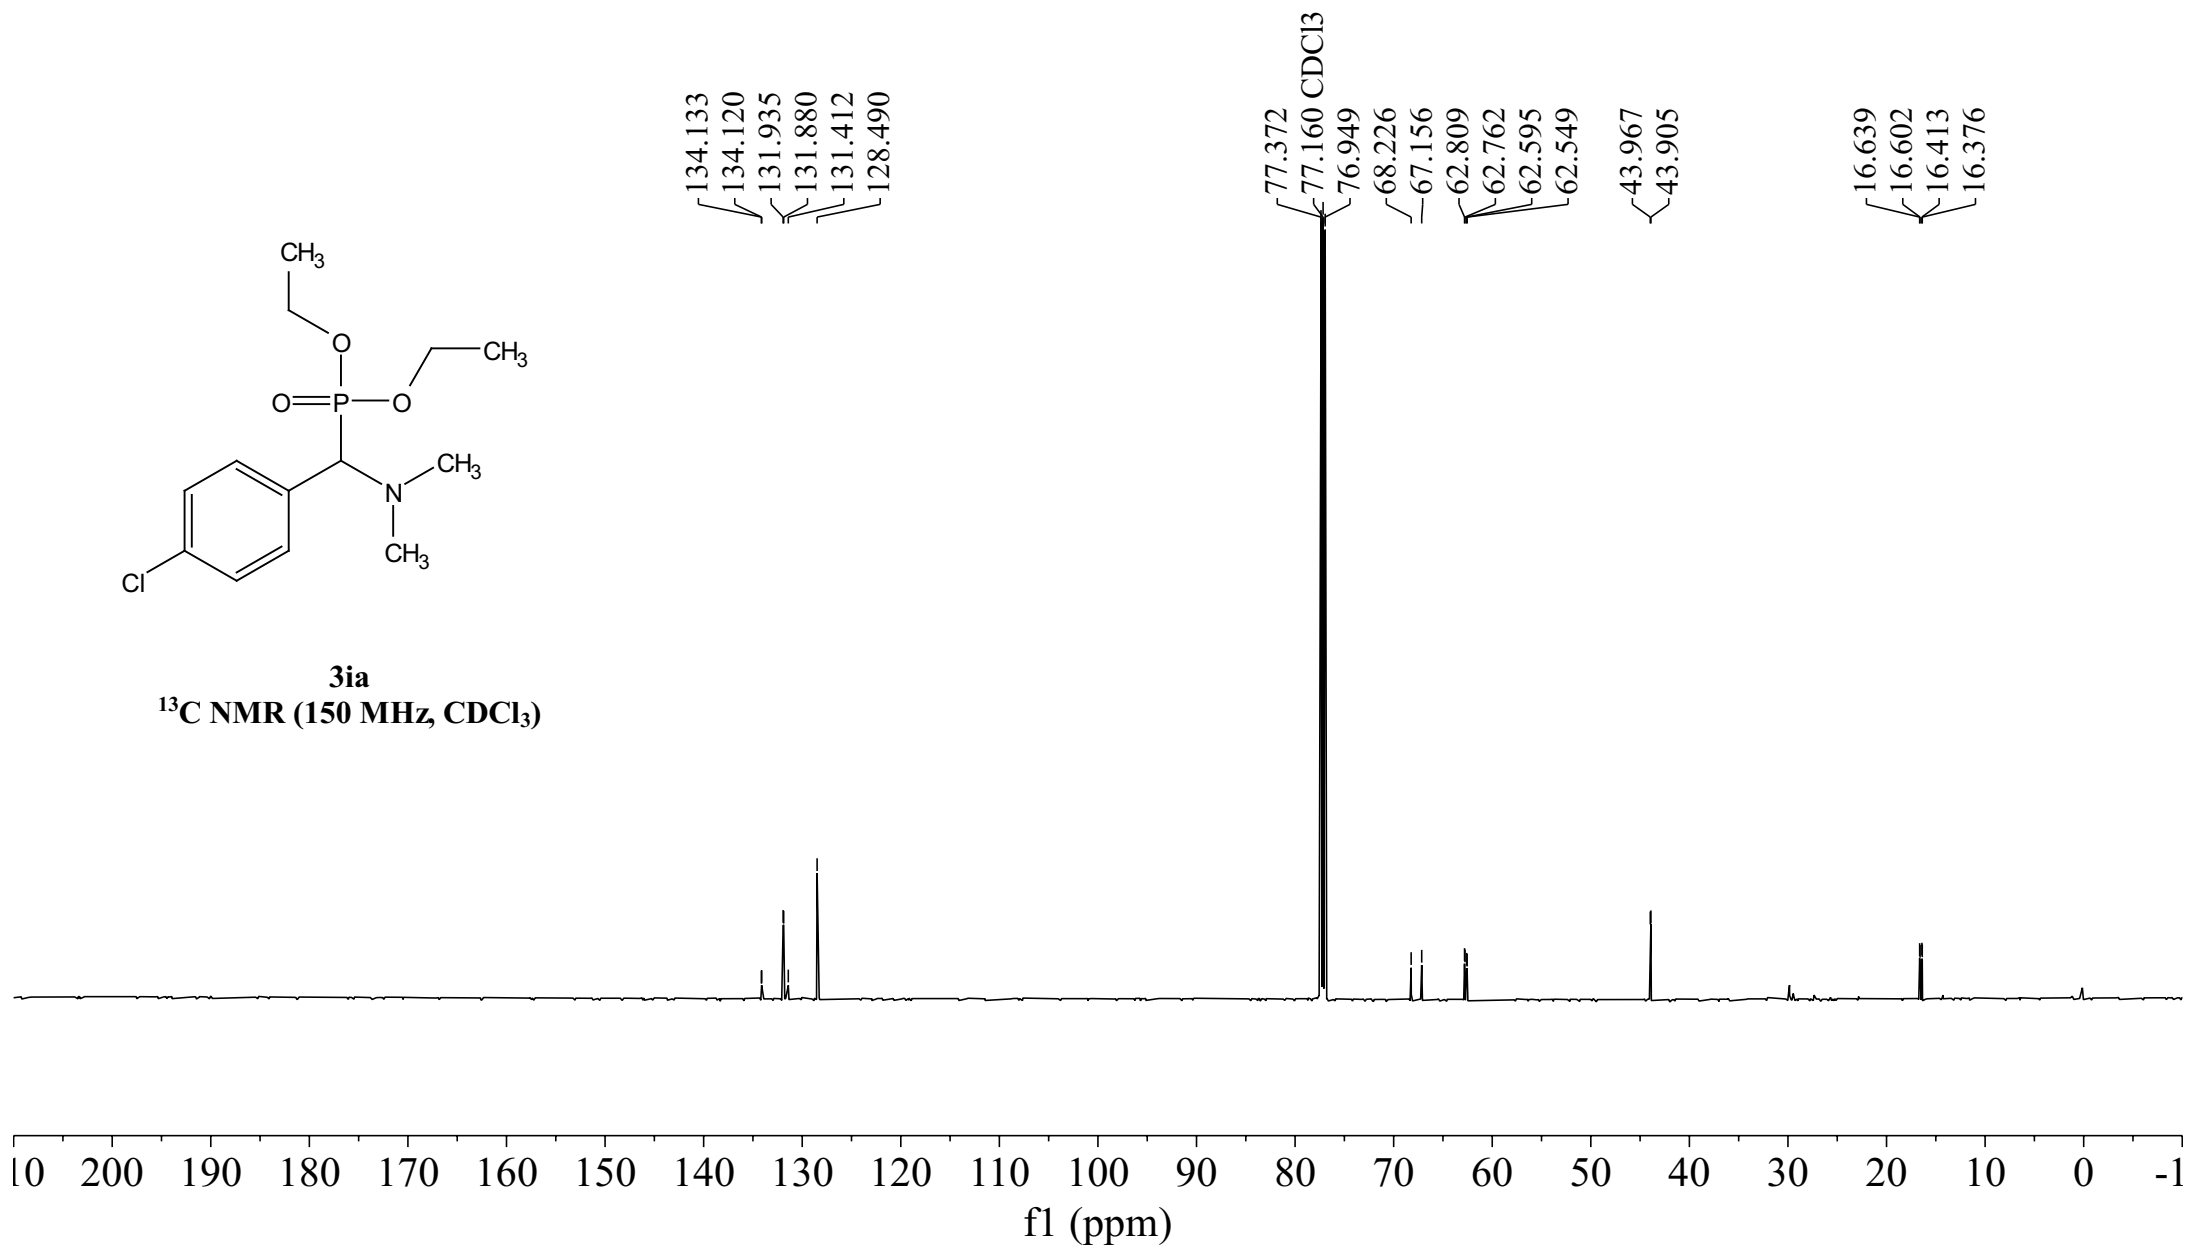

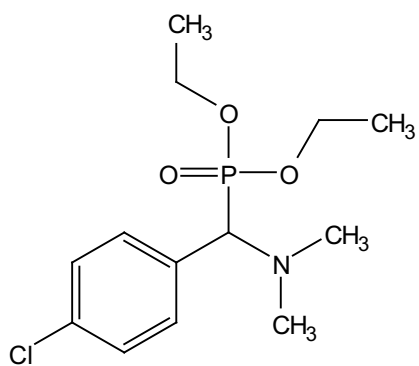

**3ia**  
**<sup>31</sup>P NMR (162 MHz, CDCl<sub>3</sub>)**

—22.213



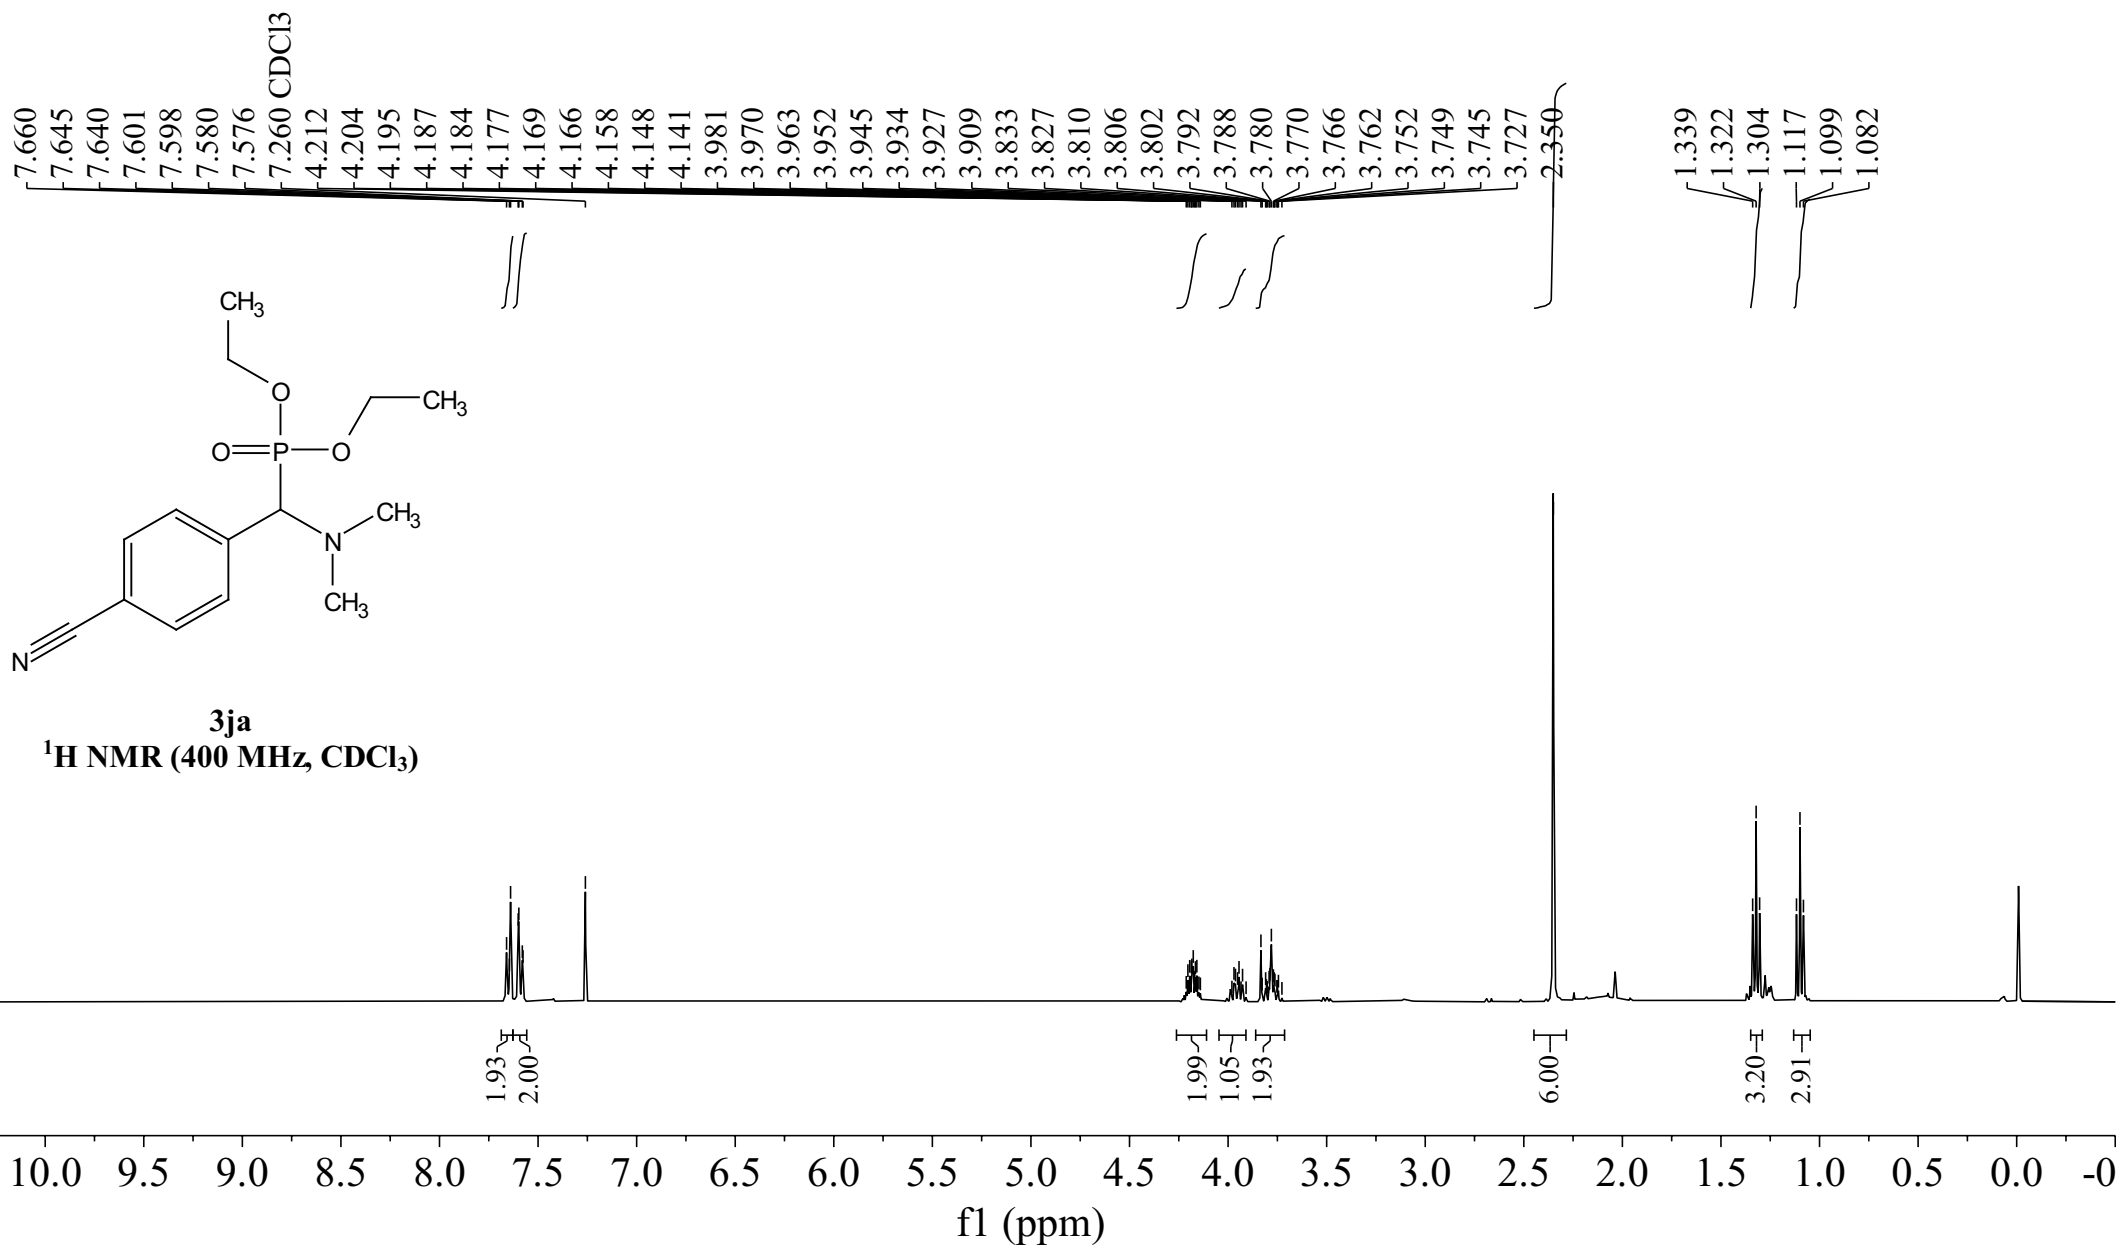



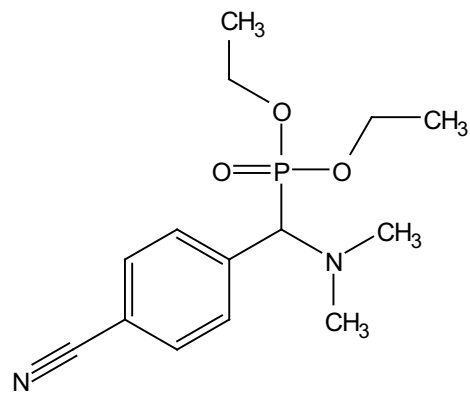

**3ja**

<sup>13</sup>C NMR (100 MHz, CDCl<sub>3</sub>)

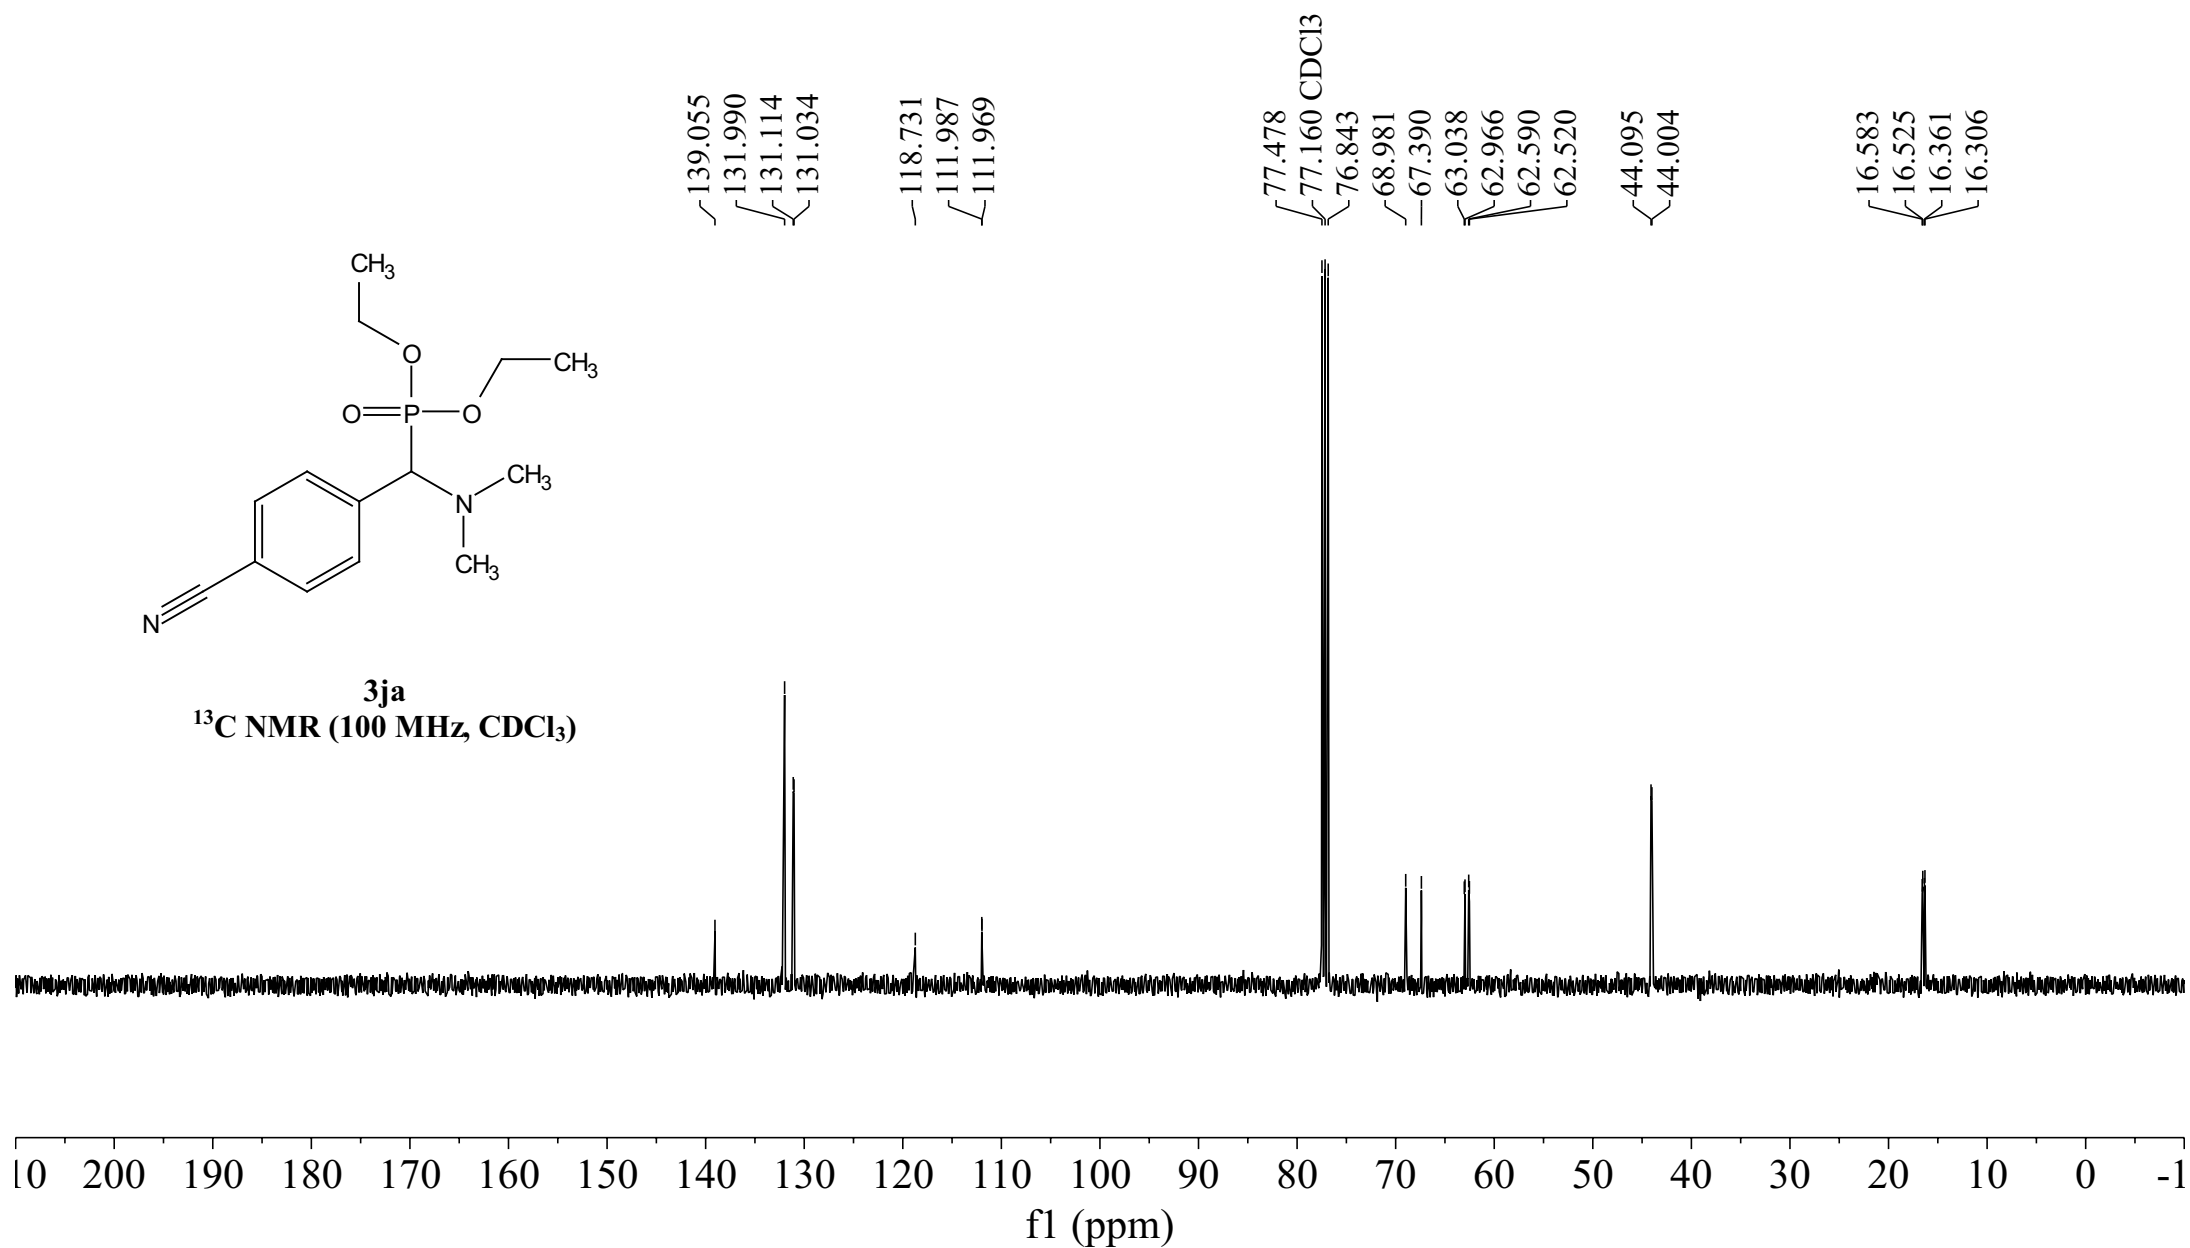

-21.330

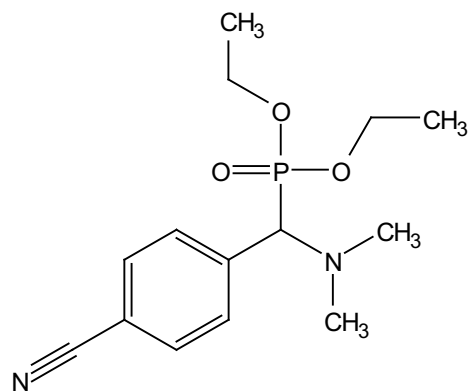

**3ja**

**<sup>31</sup>P NMR (162 MHz, CDCl<sub>3</sub>)**

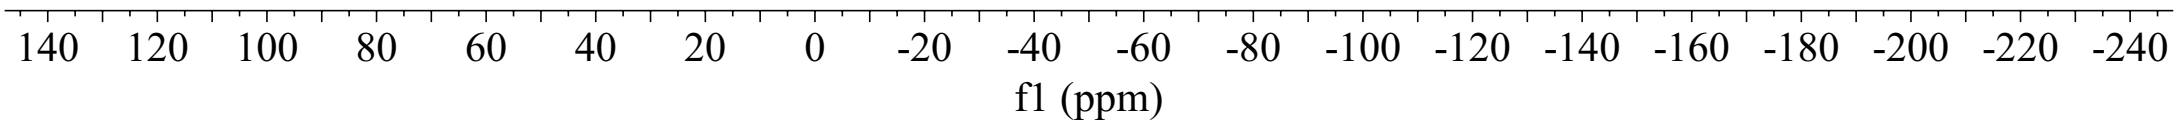

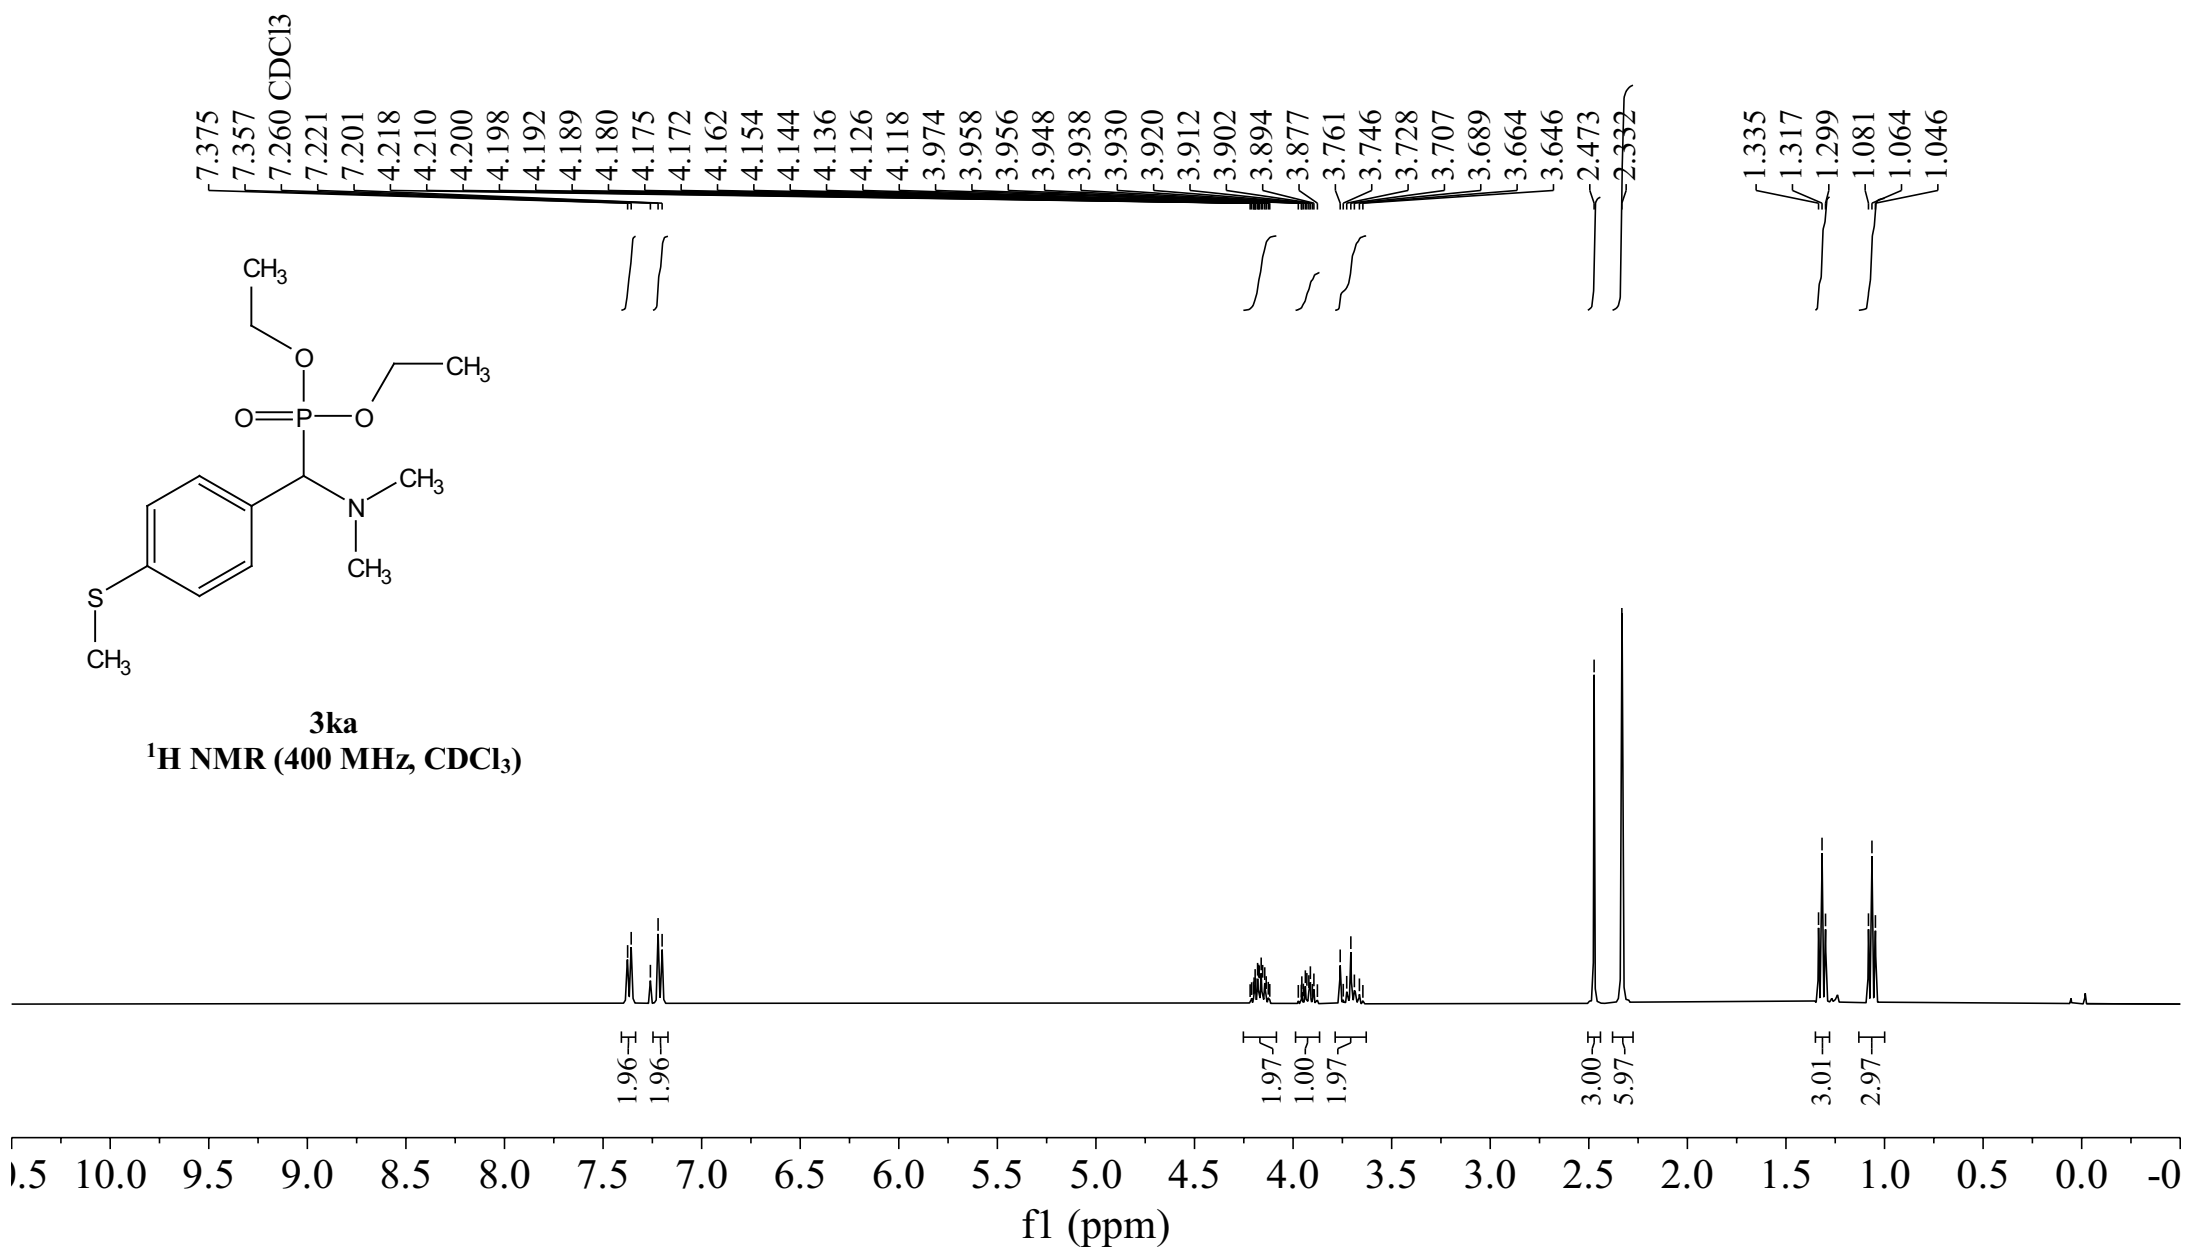

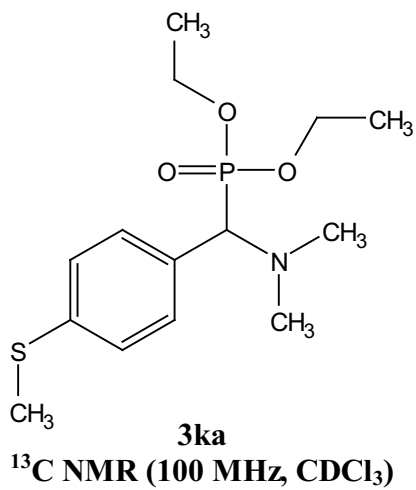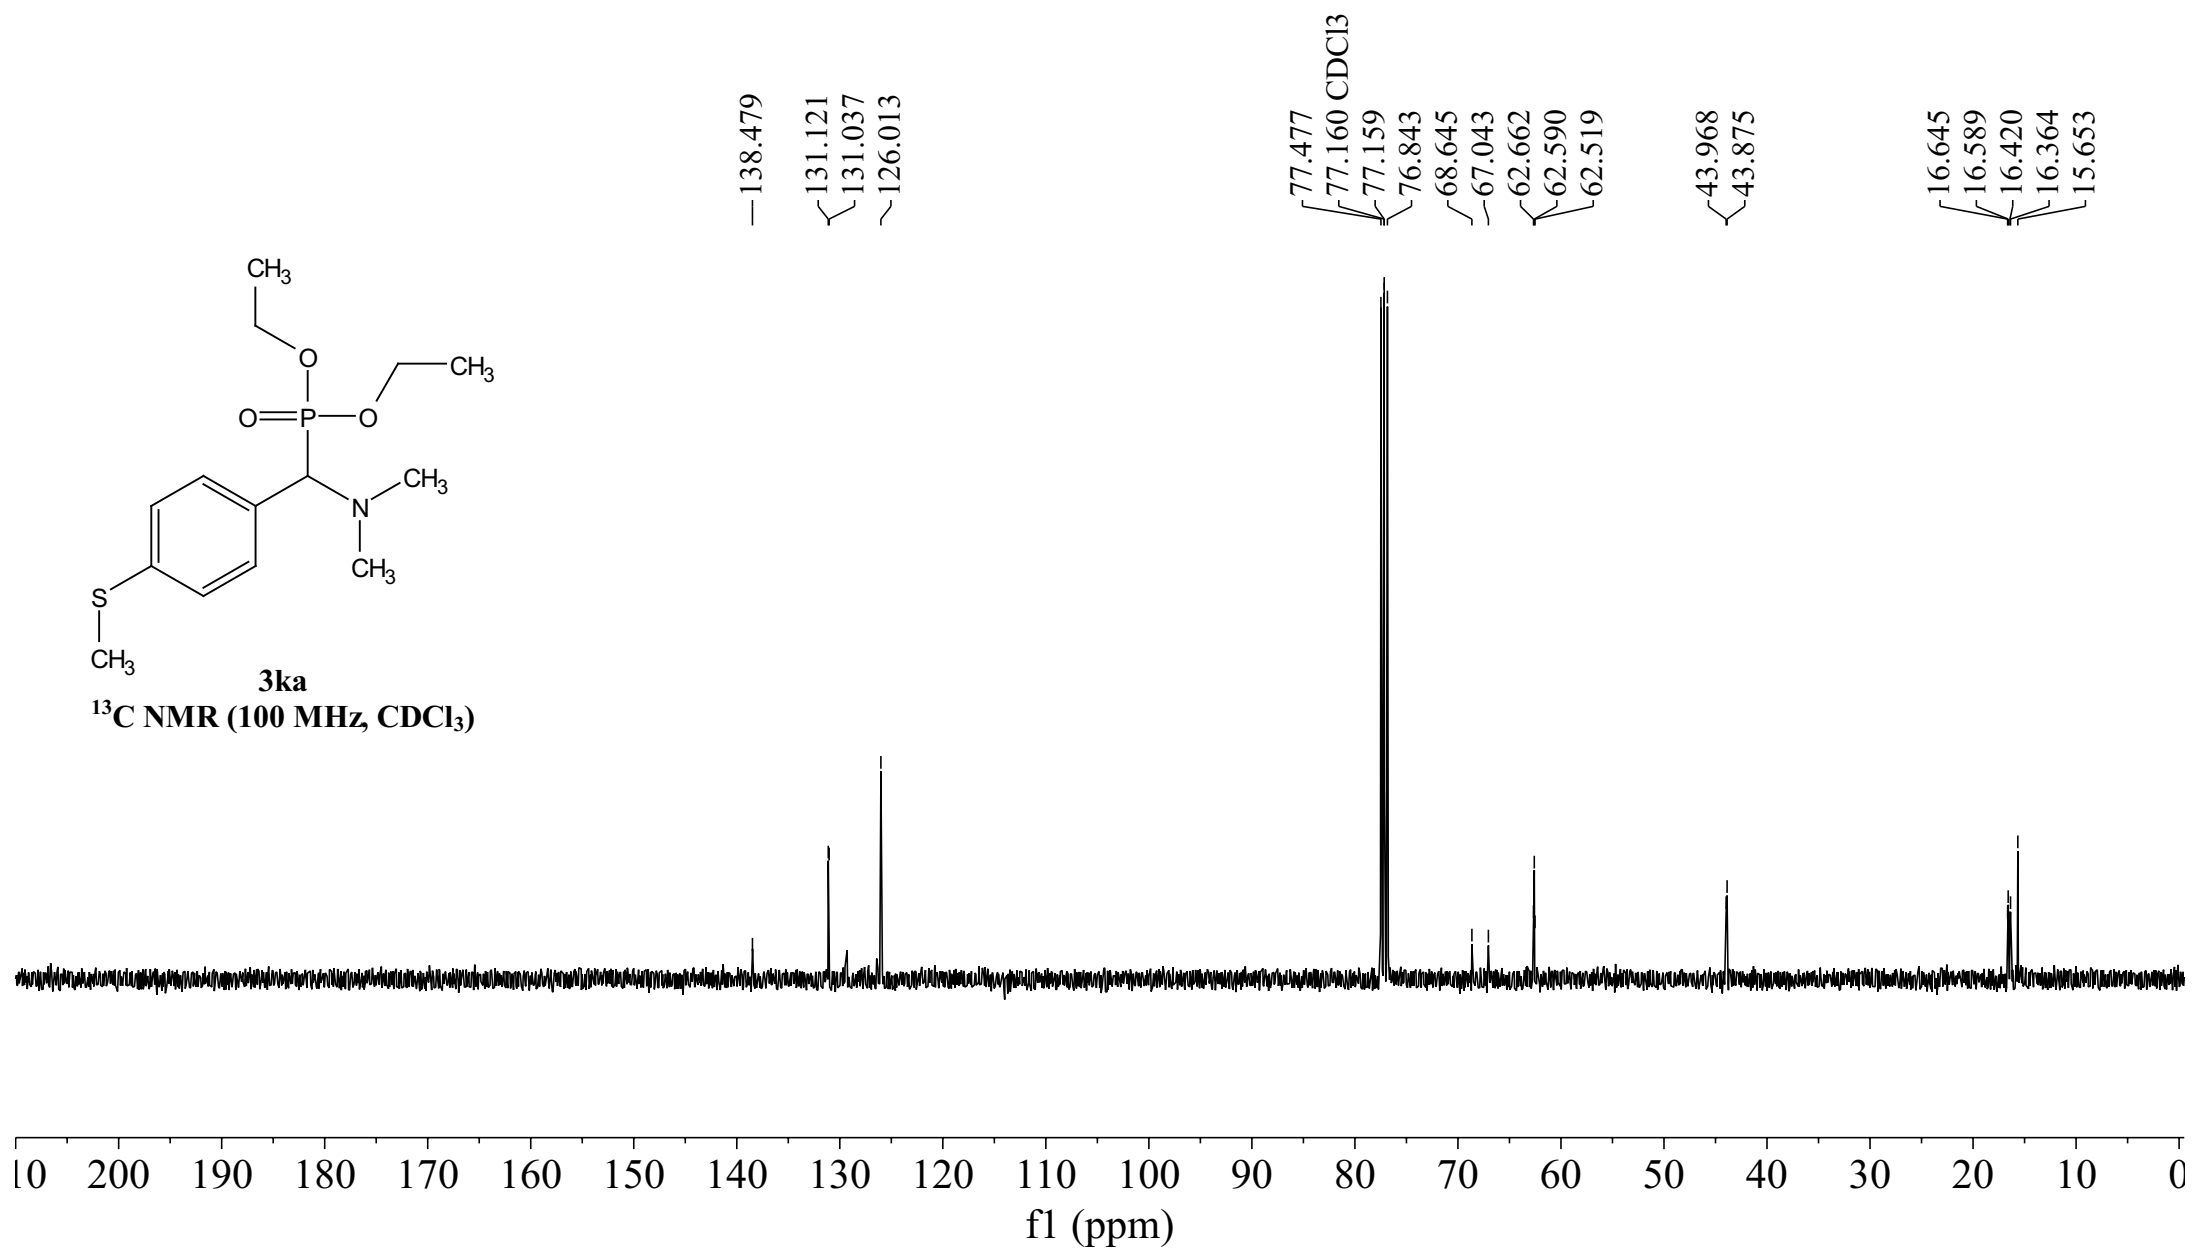

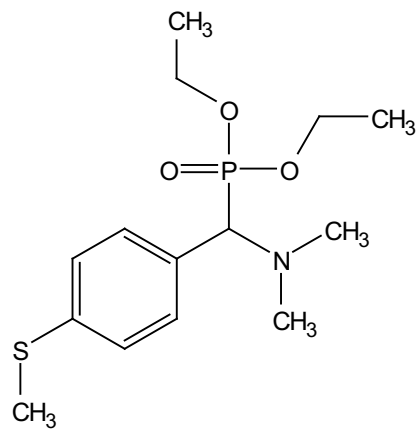

**3ka**

<sup>31</sup>P NMR (162 MHz, CDCl<sub>3</sub>)

—22.616



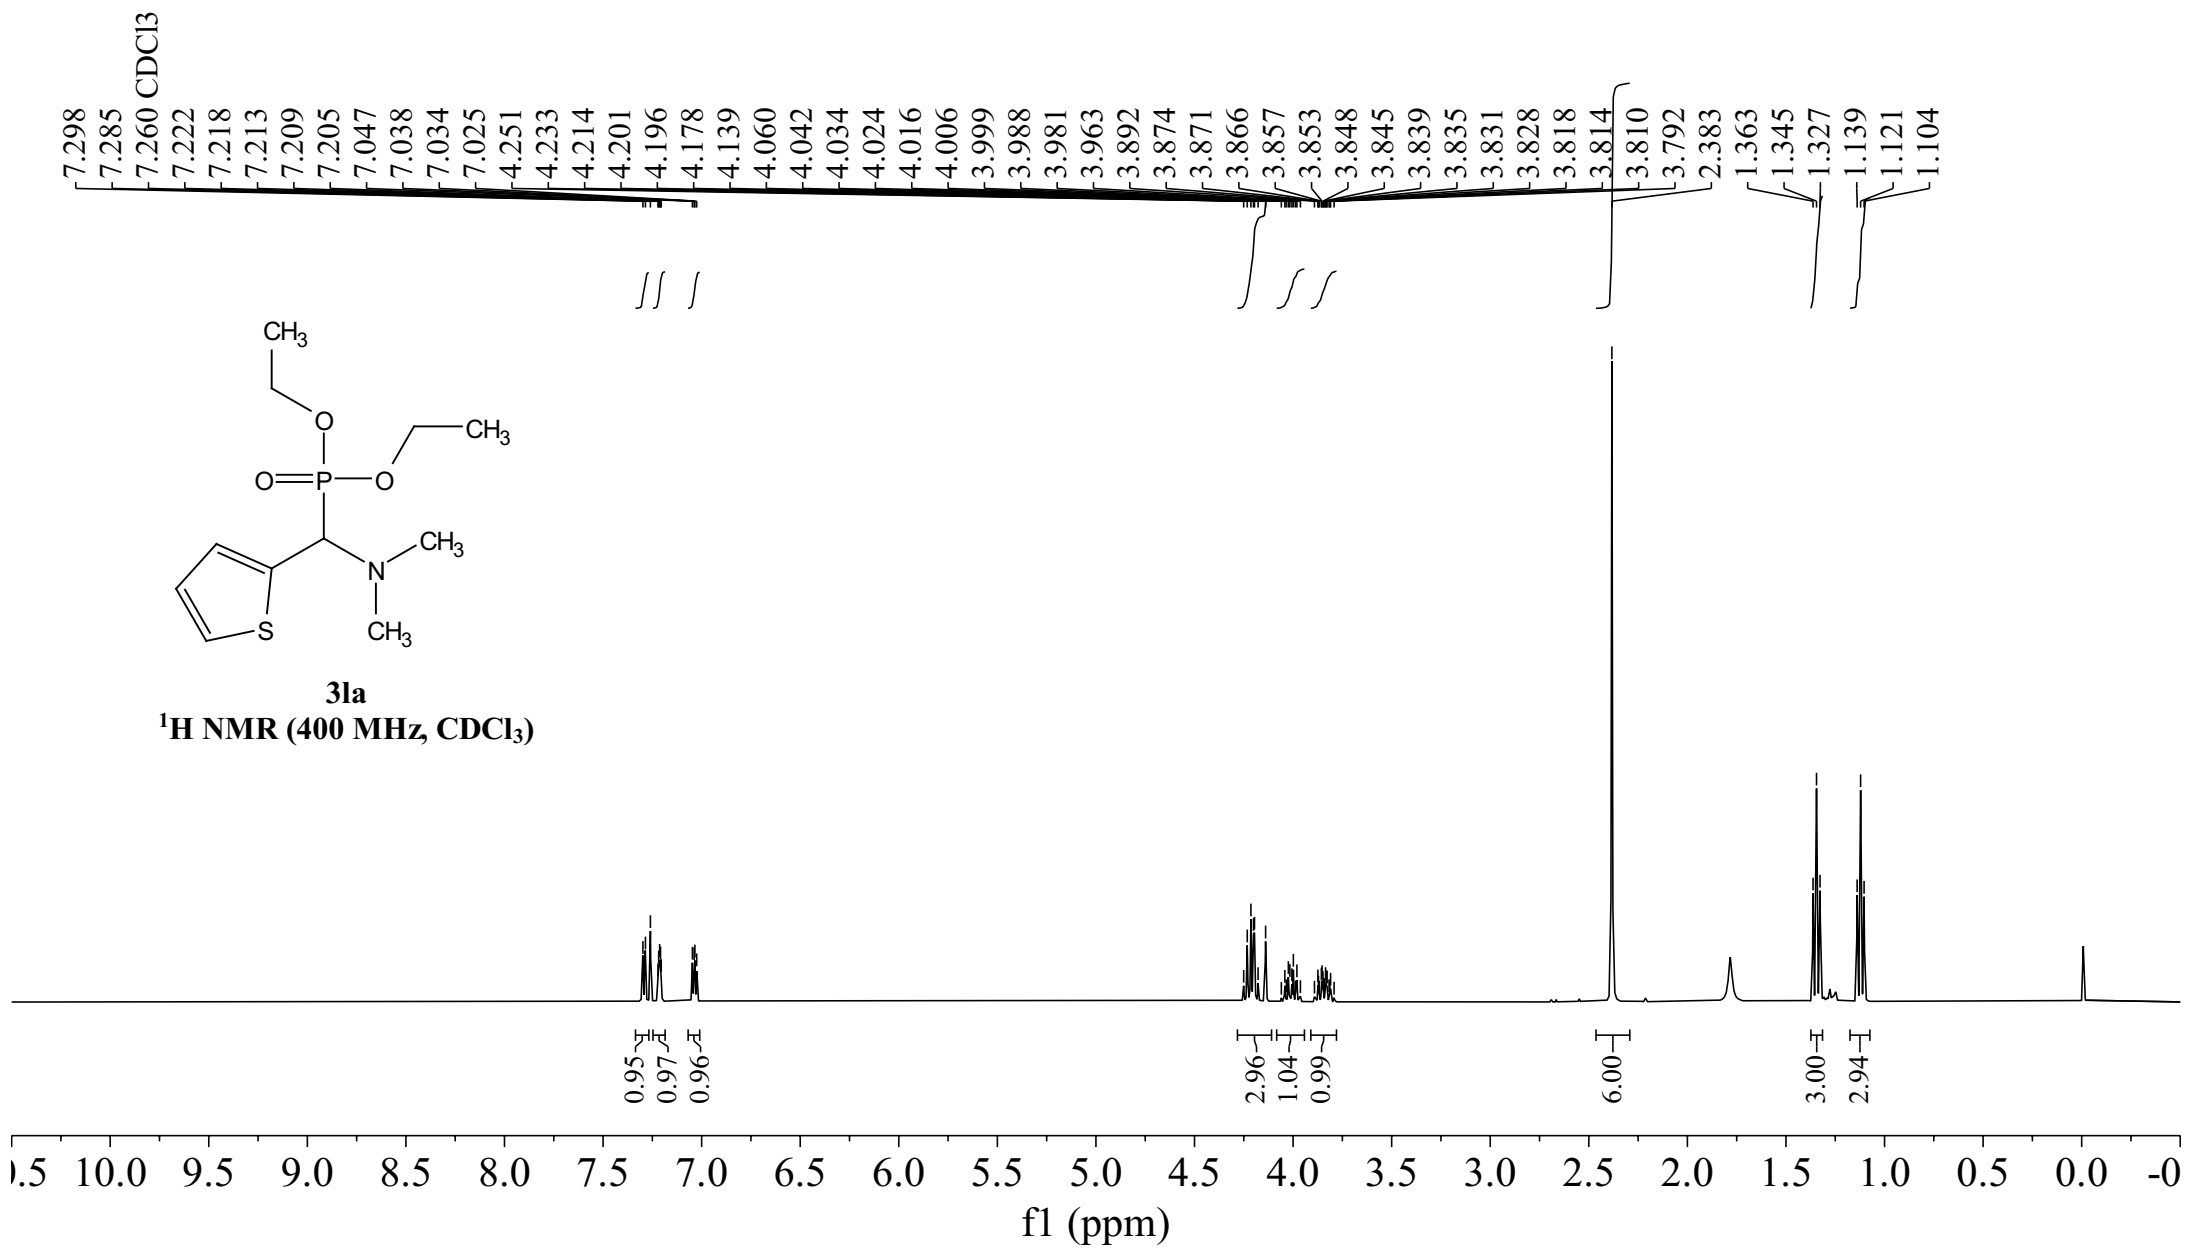

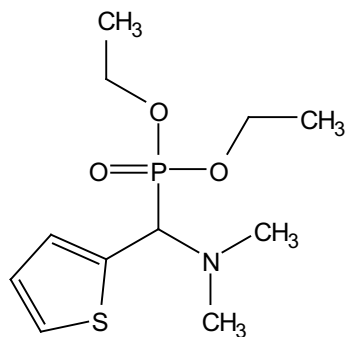

**3la**

<sup>13</sup>C NMR (100 MHz, CDCl<sub>3</sub>)

132.931  
132.865  
129.226  
129.158  
126.967  
125.900  
125.880  
  
77.477  
77.160 CDCl<sub>3</sub>  
76.843  
63.129  
63.053  
62.773  
62.702  
61.478  
  
43.327  
43.240  
  
16.669  
16.614  
16.413  
16.358

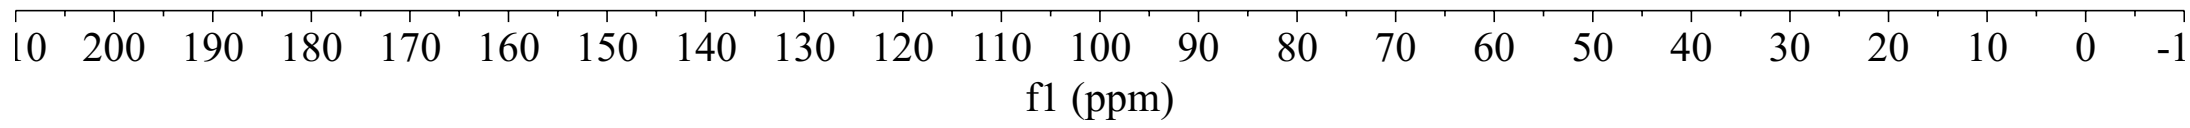

—21.238

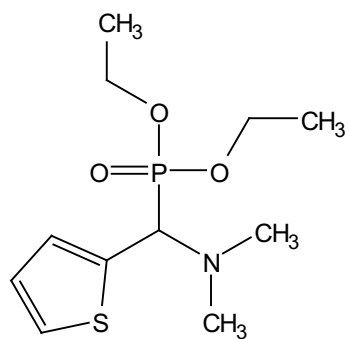

**3la**

**<sup>31</sup>P NMR (162 MHz, CDCl<sub>3</sub>)**





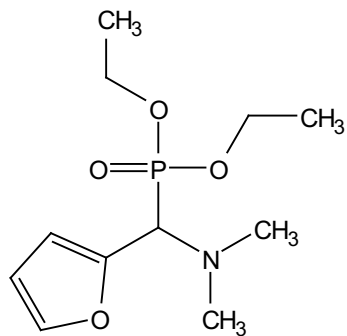

**3ma**  
<sup>1</sup>H NMR (400 MHz, CDCl<sub>3</sub>)

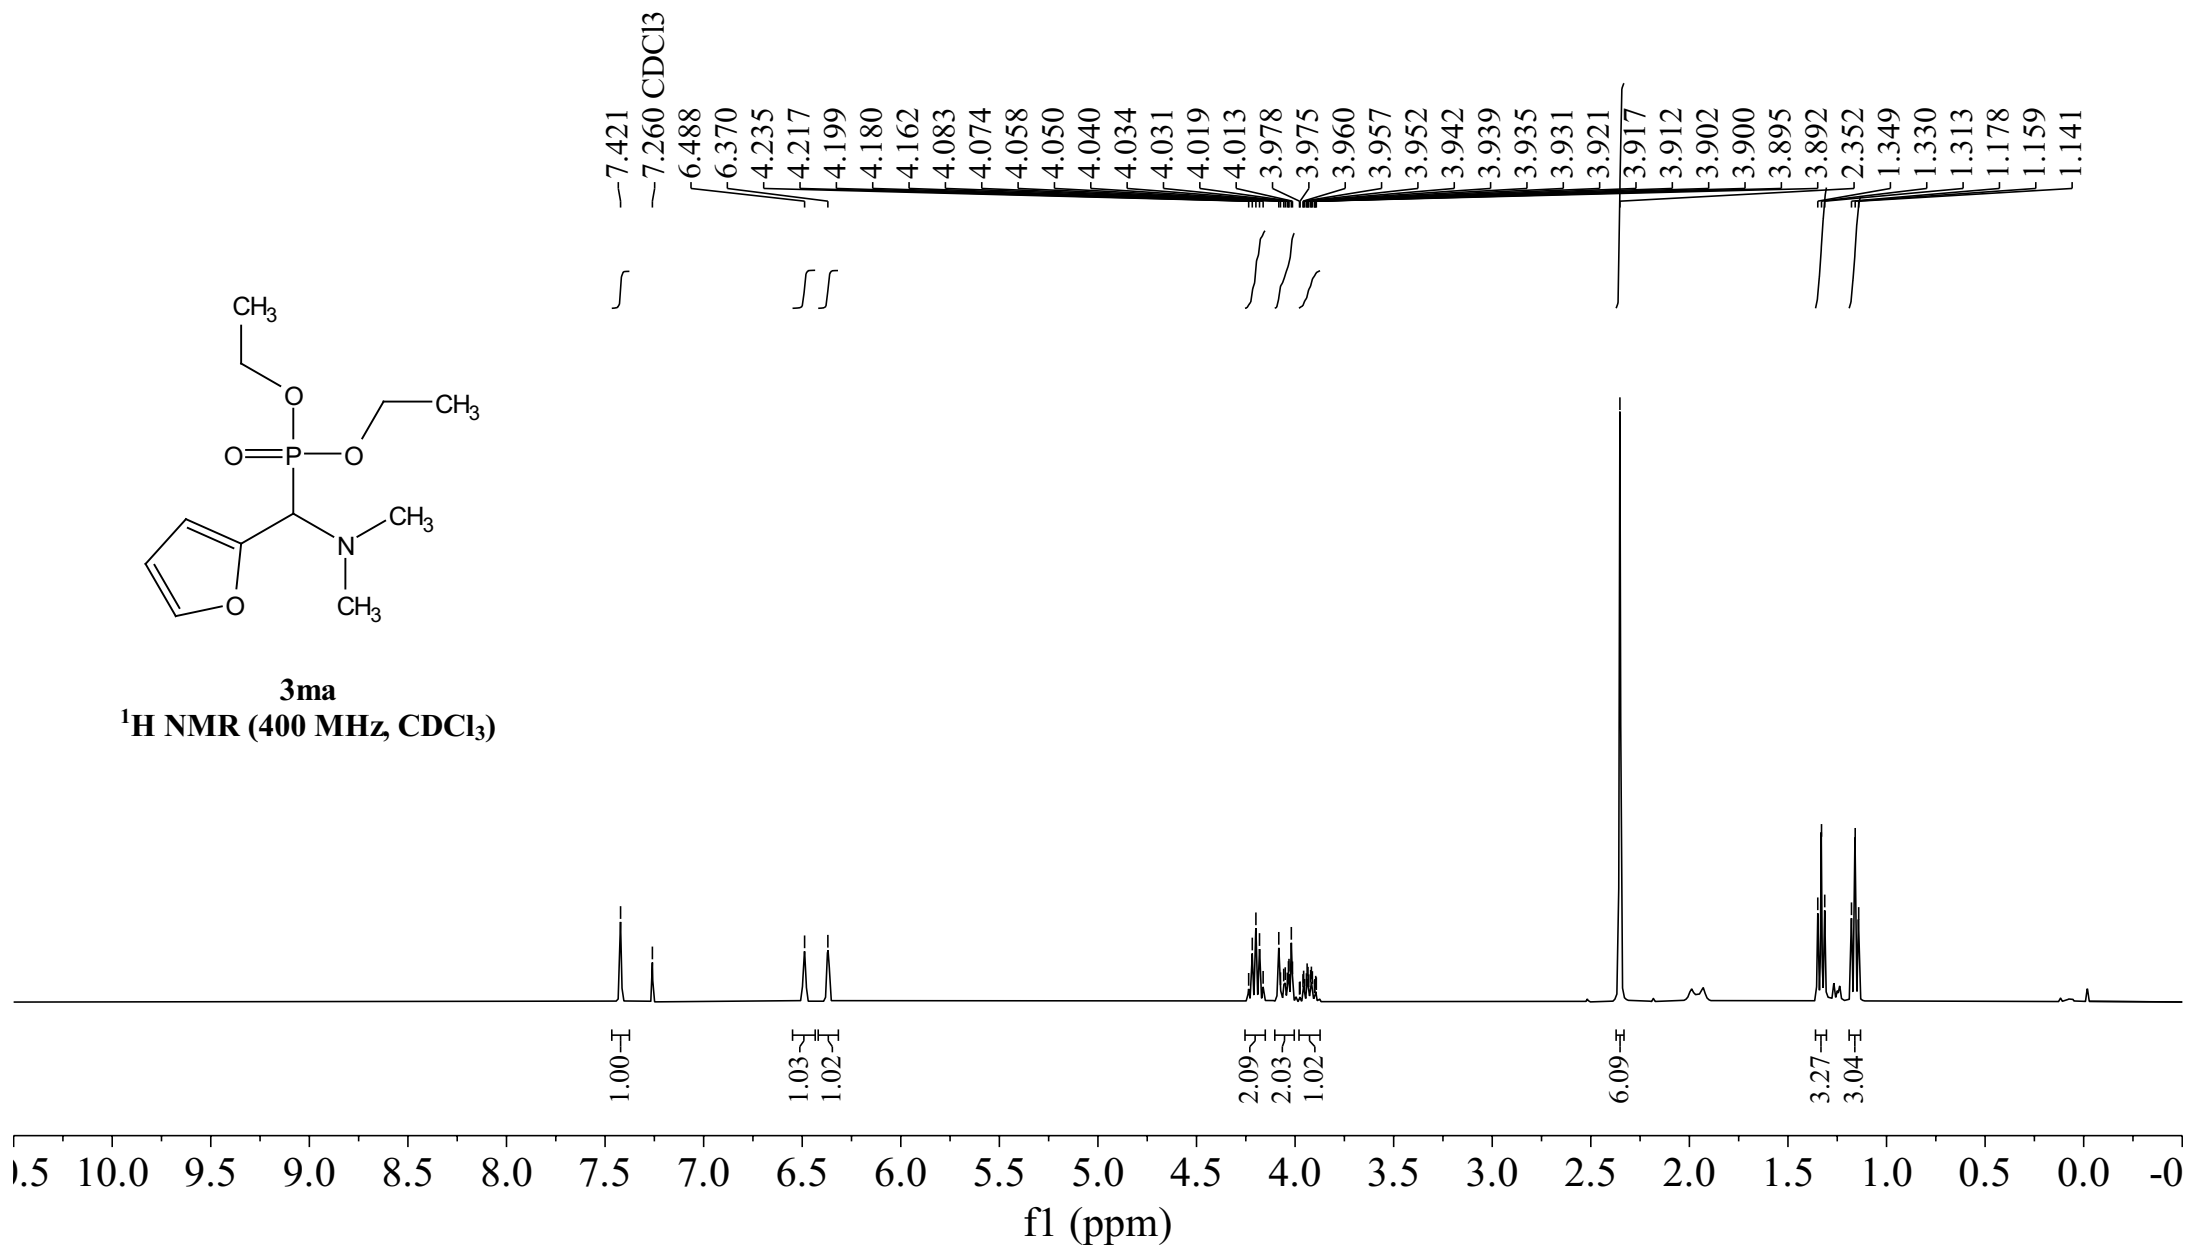

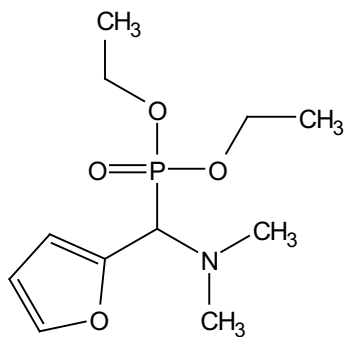

**3ma**

**$^{13}\text{C}$  NMR (100 MHz,  $\text{CDCl}_3$ )**

147.188  
147.086  
142.791  
142.772

111.483  
111.438  
110.467

77.478  
77.160  $\text{CDCl}_3$   
76.843  
63.077  
63.008  
62.682  
62.614  
61.688  
60.023  
43.676  
43.587

16.626  
16.570  
16.444  
16.389

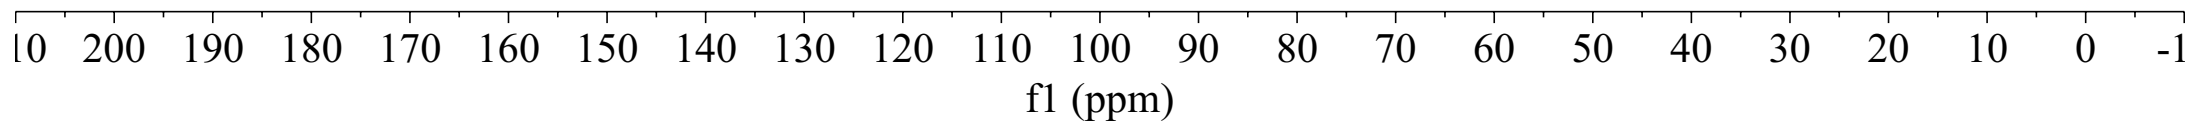

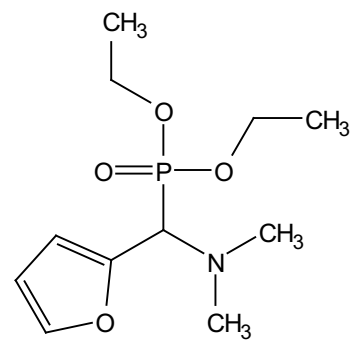

**3ma**

**<sup>31</sup>P NMR (162 MHz, CDCl<sub>3</sub>)**

—20.545



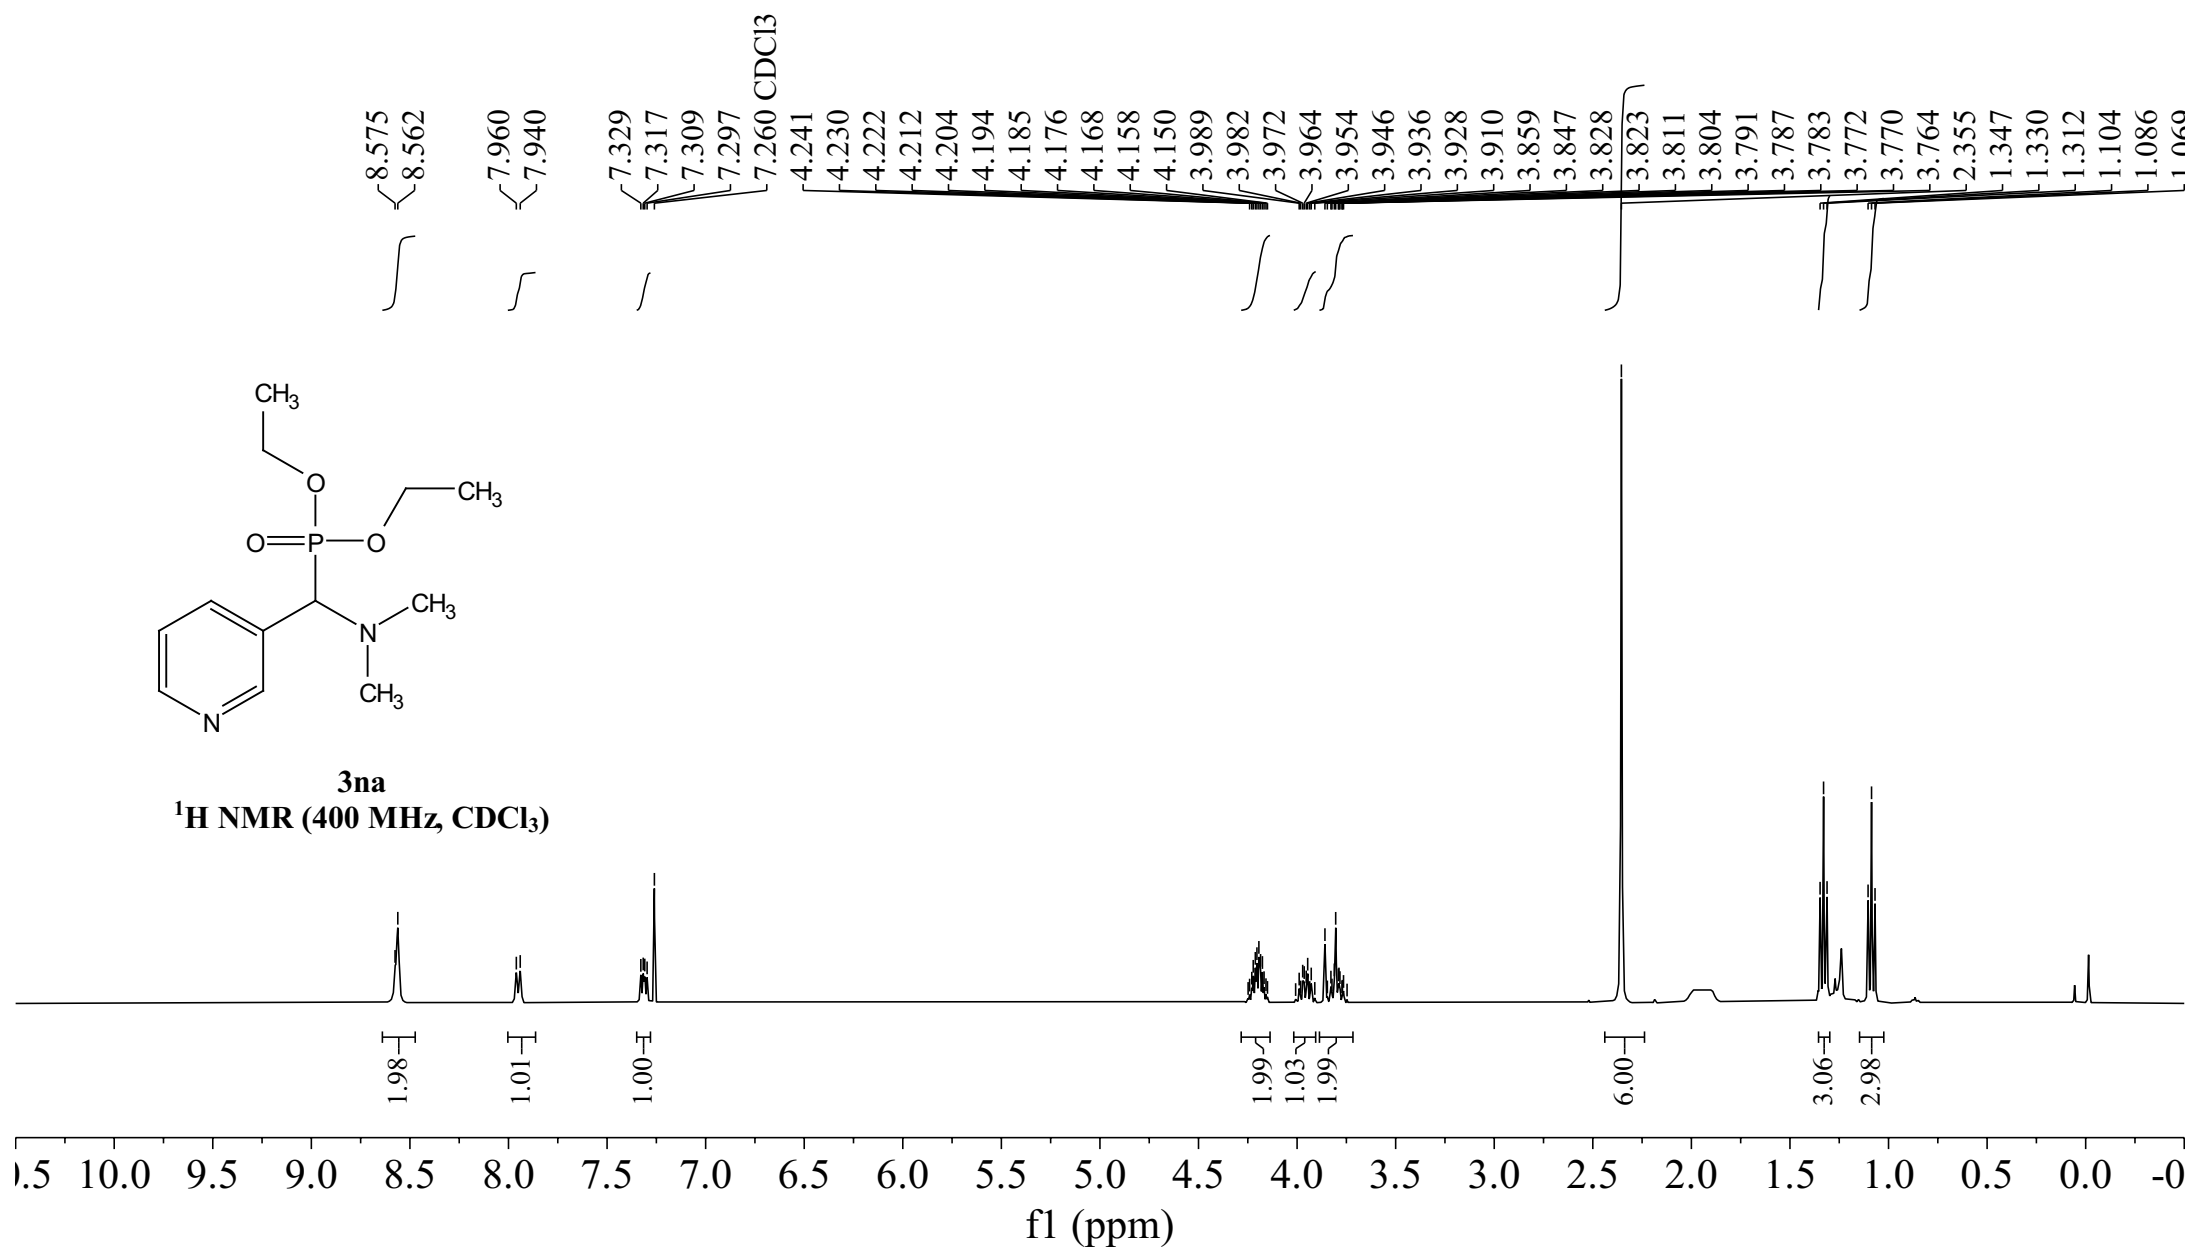

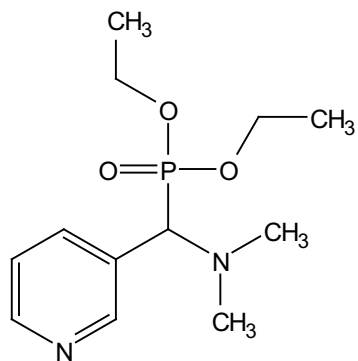

**3na**

<sup>13</sup>C NMR (175 MHz, CDCl<sub>3</sub>)

151.491  
151.428  
149.468

137.841  
137.807

128.773  
123.248

77.342  
77.160 CDCl<sub>3</sub>  
76.978  
66.108  
65.184  
63.046  
63.006  
62.530  
62.490  
43.847  
43.796

16.614  
16.581  
16.367  
16.336

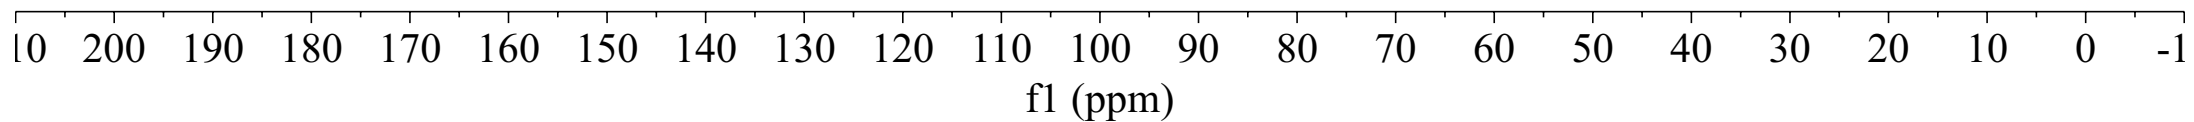

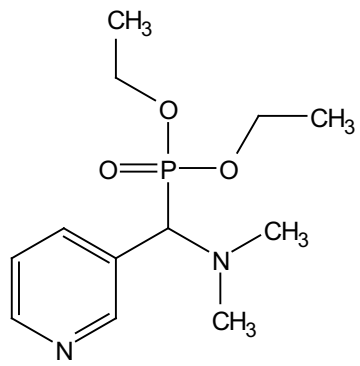

**3na**  
**<sup>31</sup>P NMR (162 MHz, CDCl<sub>3</sub>)**

—21.740

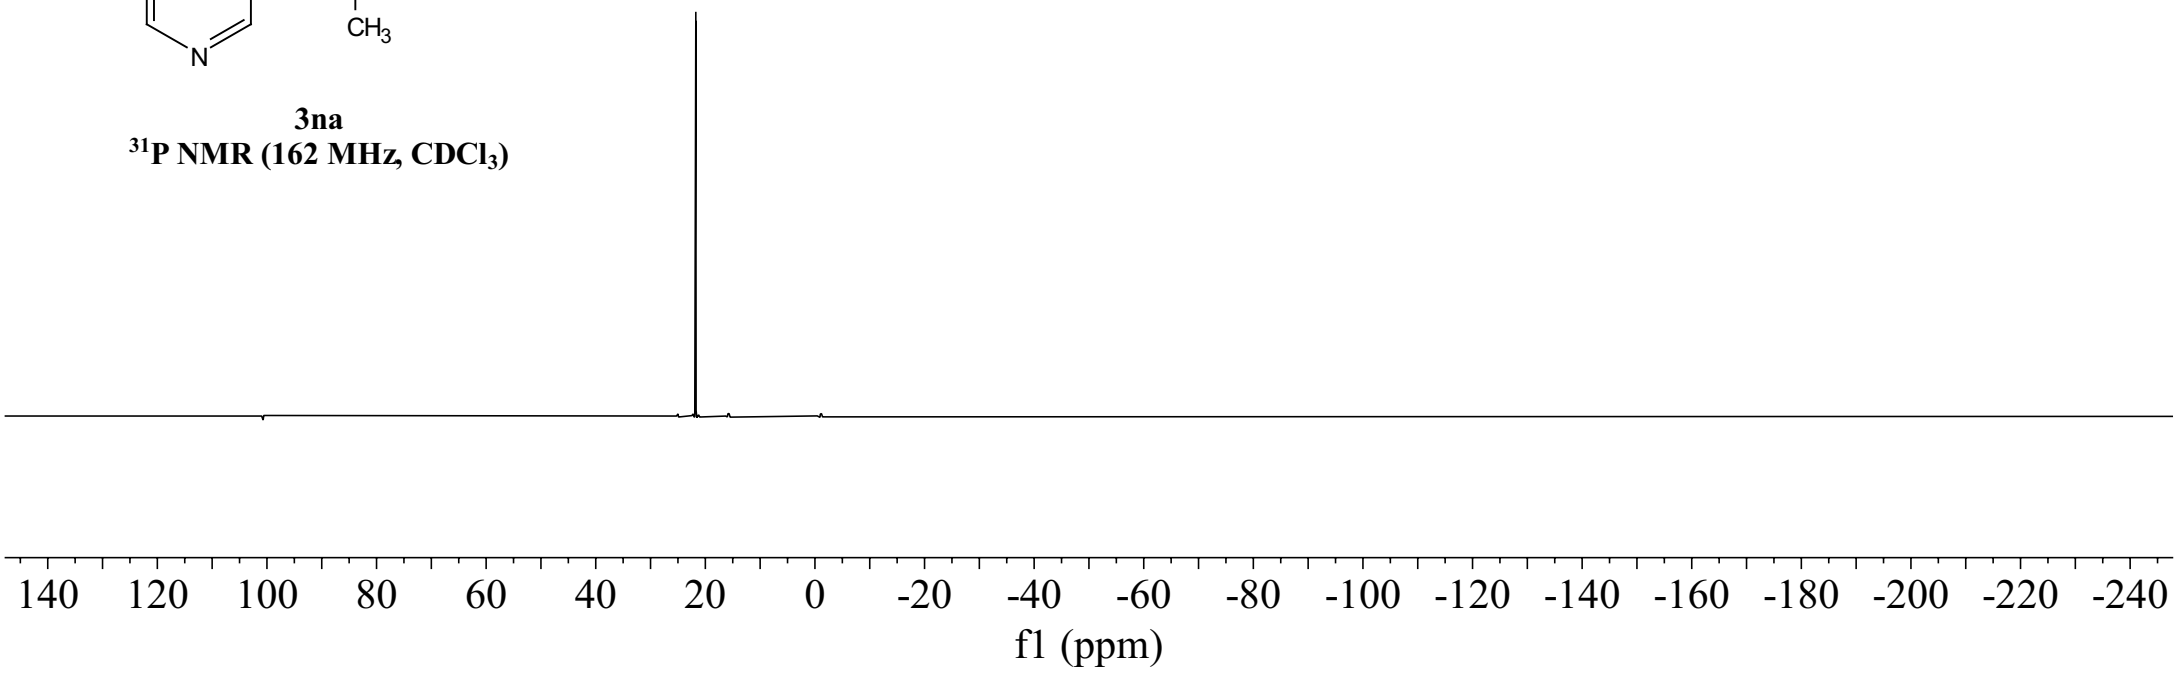

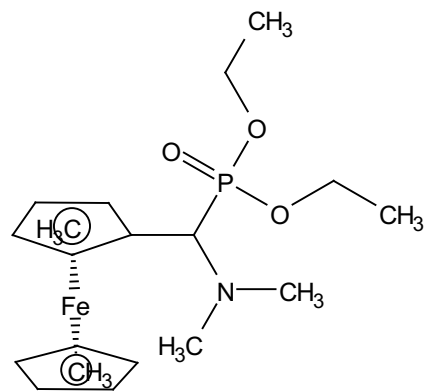

**3a**  
<sup>1</sup>H NMR (400 MHz, CDCl<sub>3</sub>)

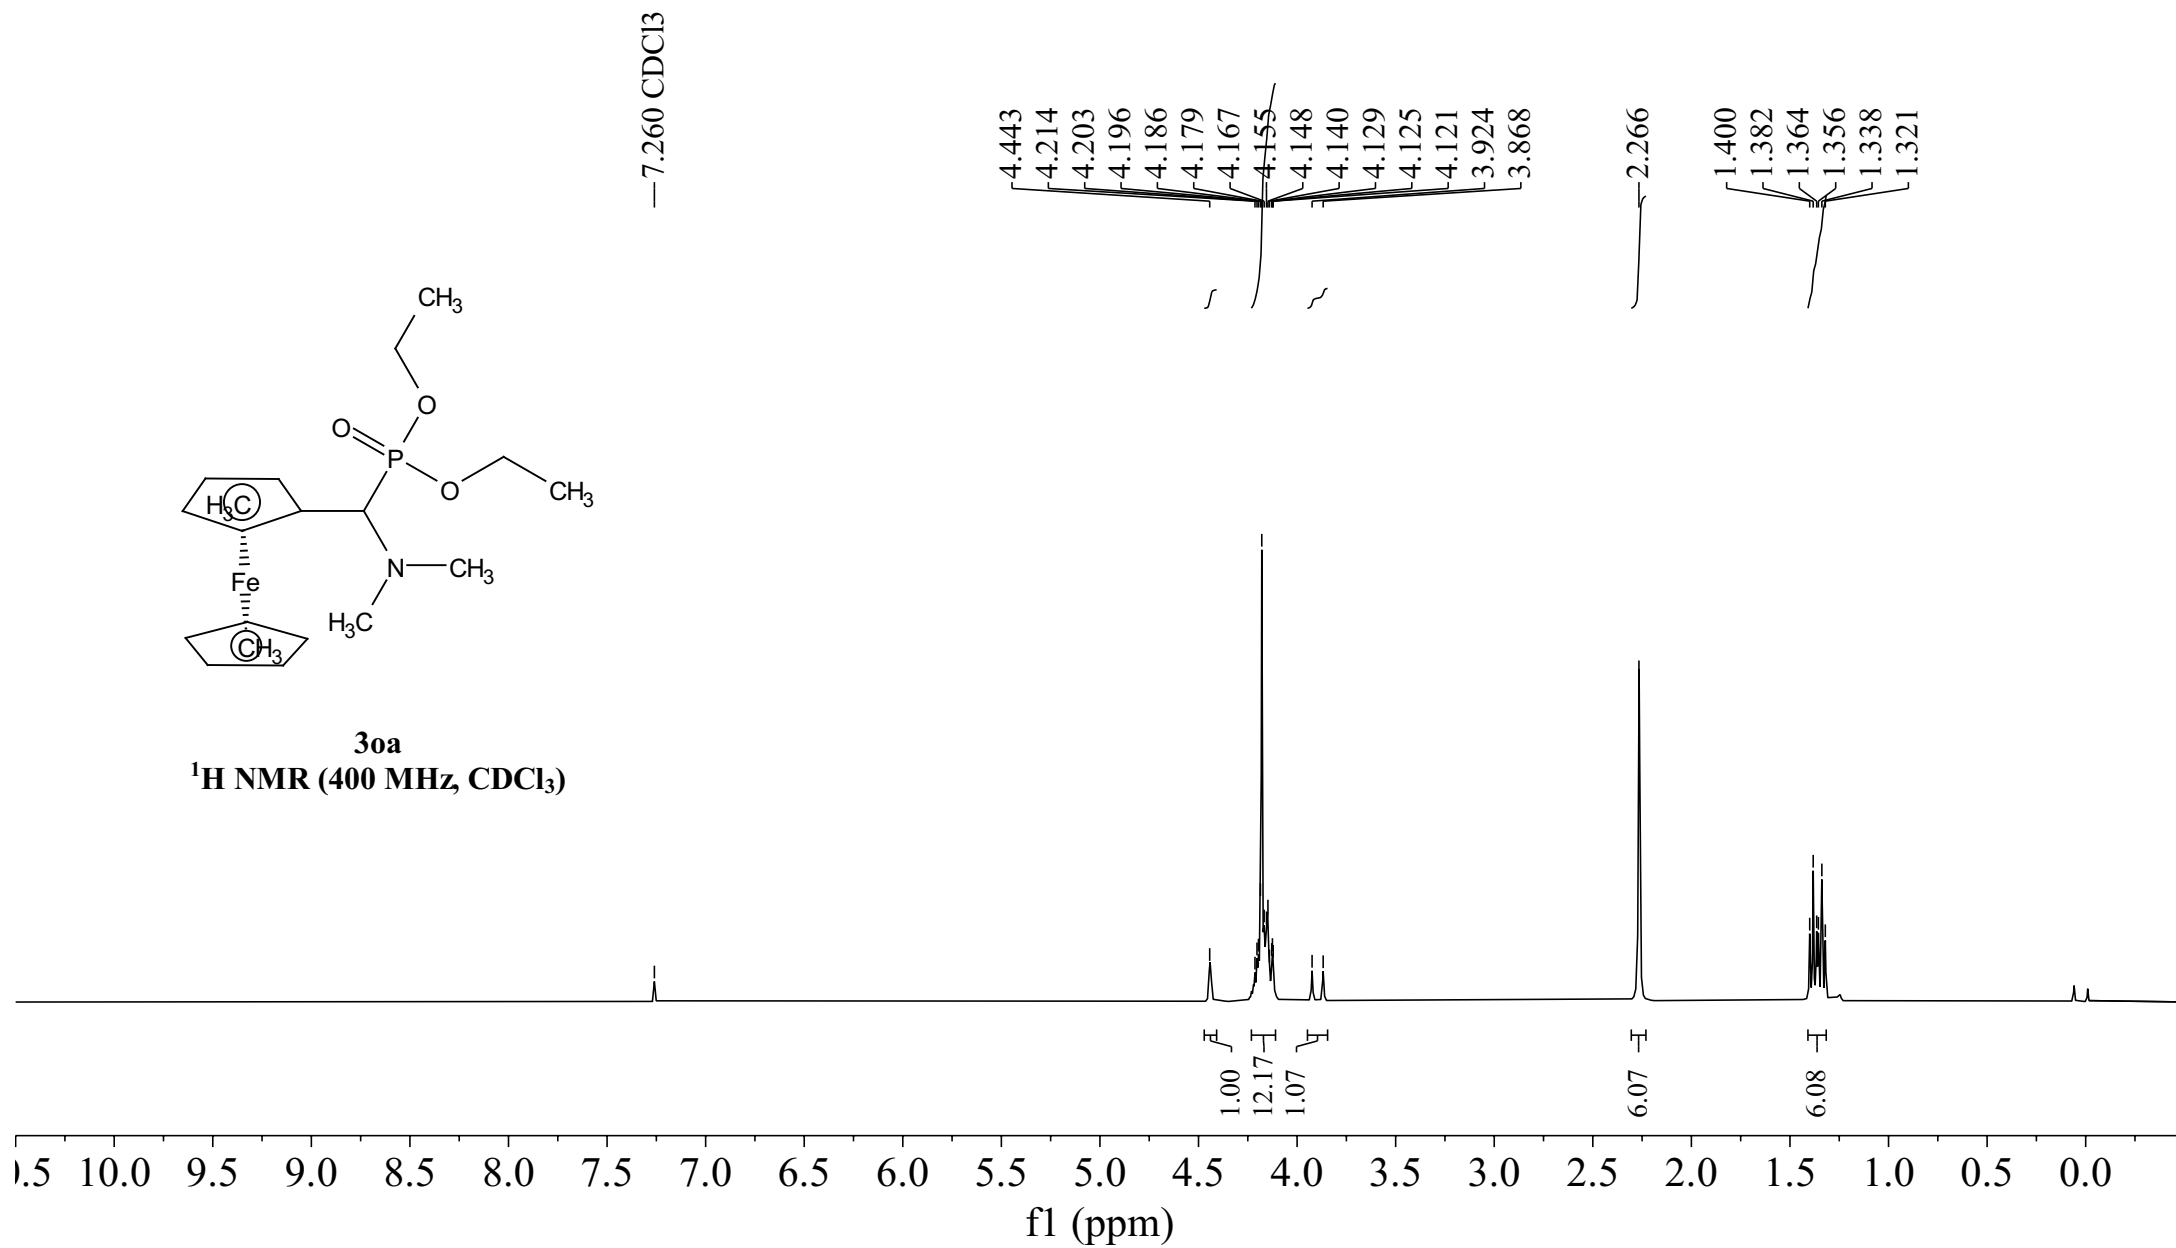

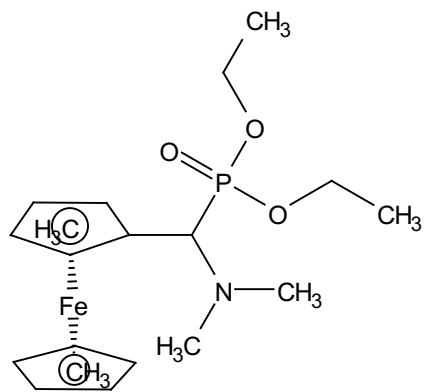

30a

<sup>13</sup>C NMR (100 MHz, CDCl<sub>3</sub>)

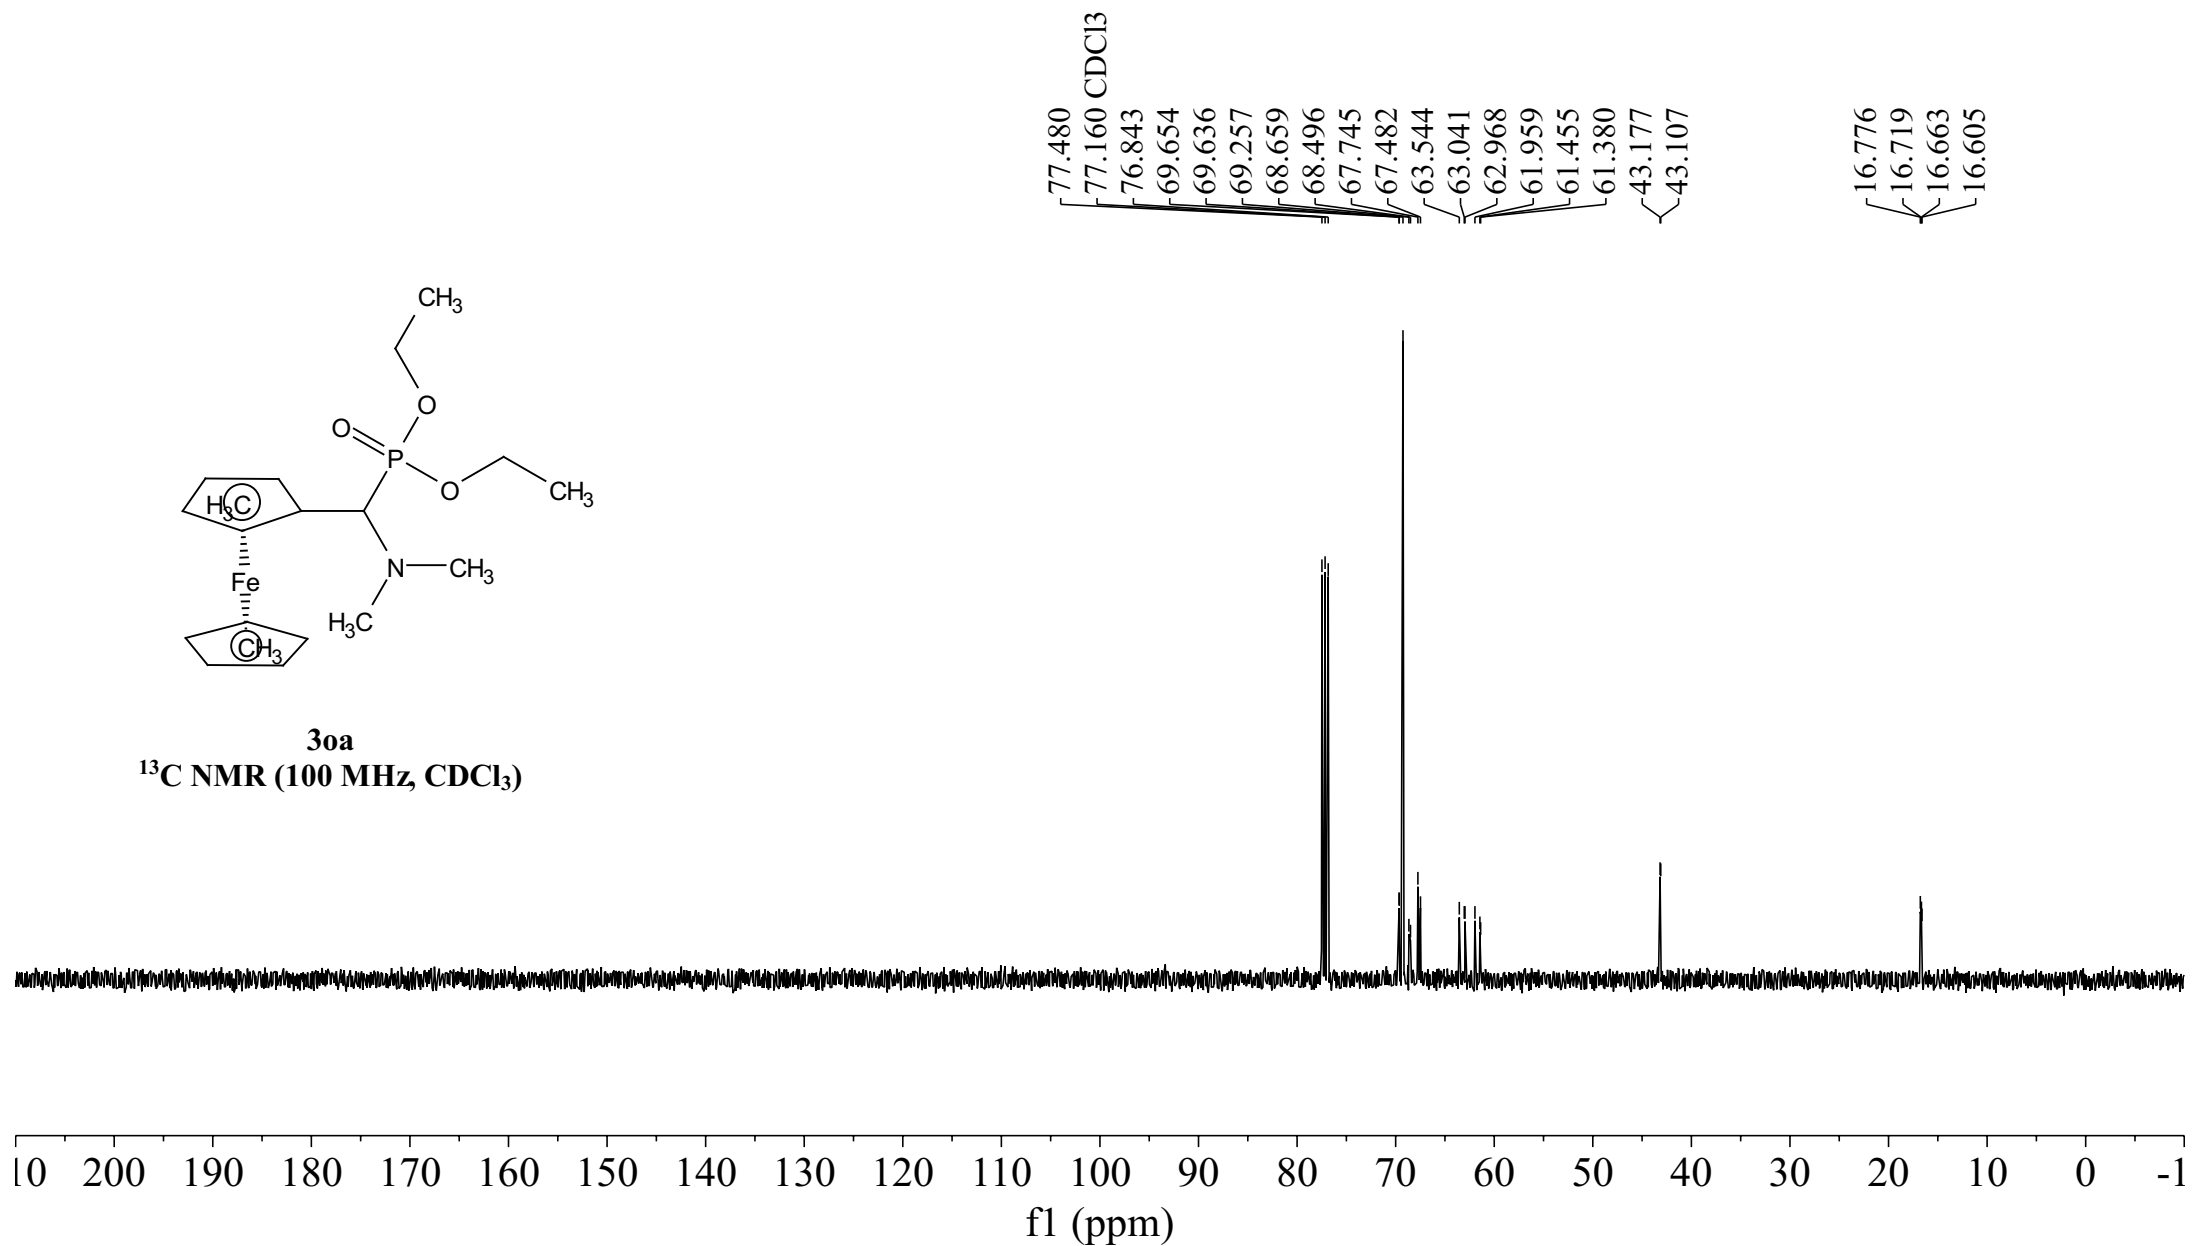



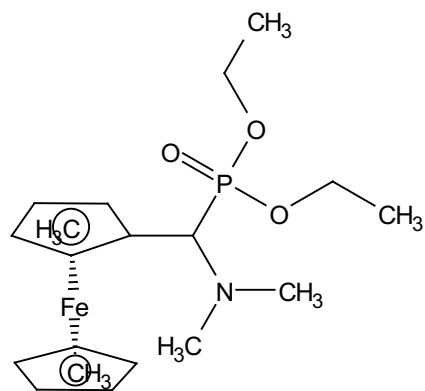

**30a**  
**<sup>31</sup>P NMR (162 MHz, CDCl<sub>3</sub>)**

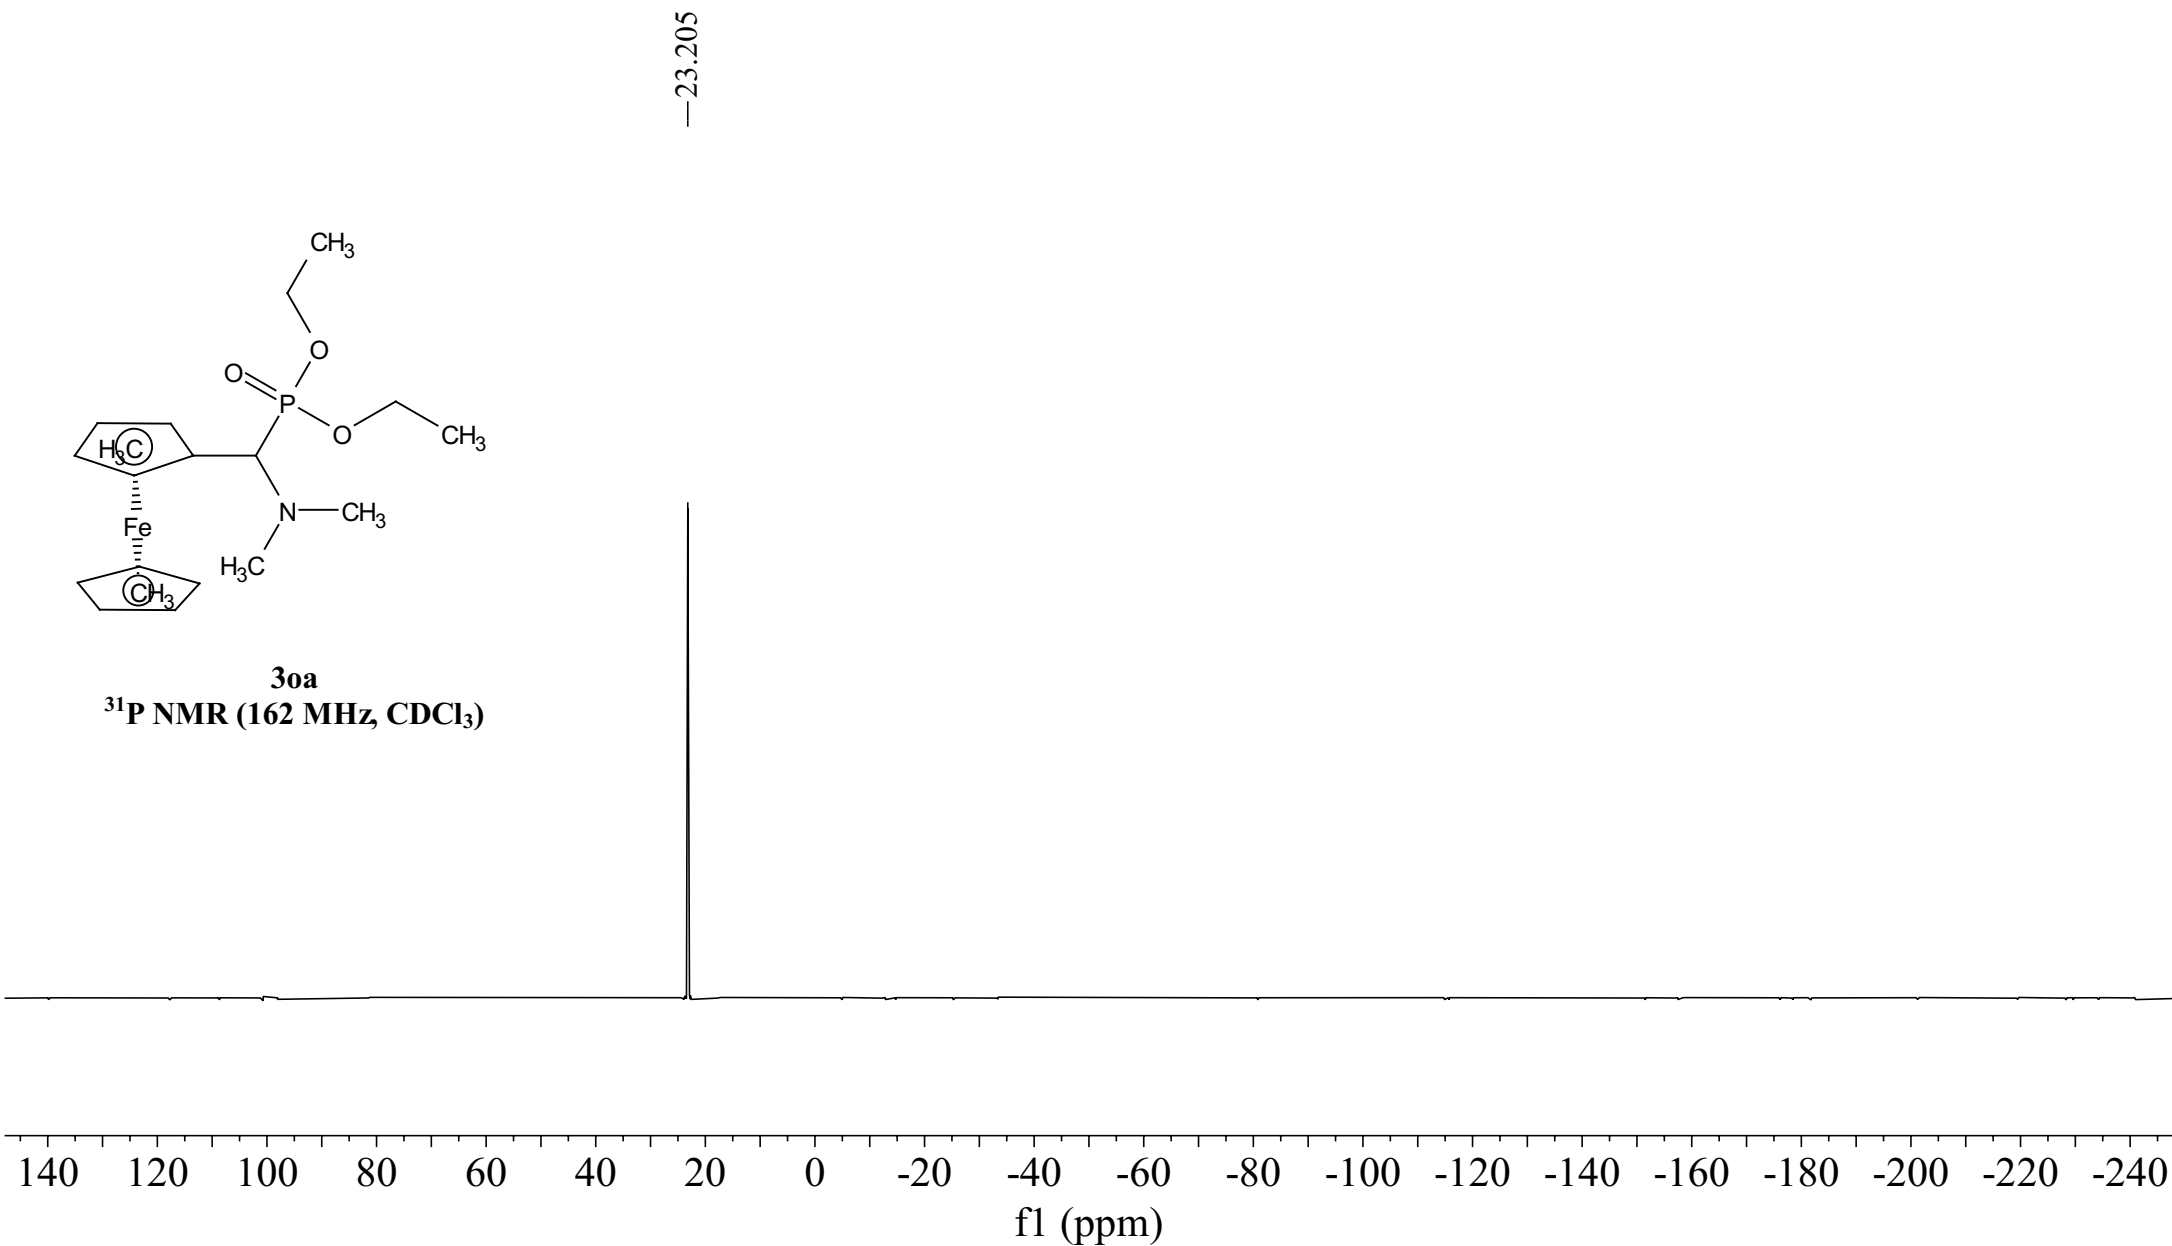

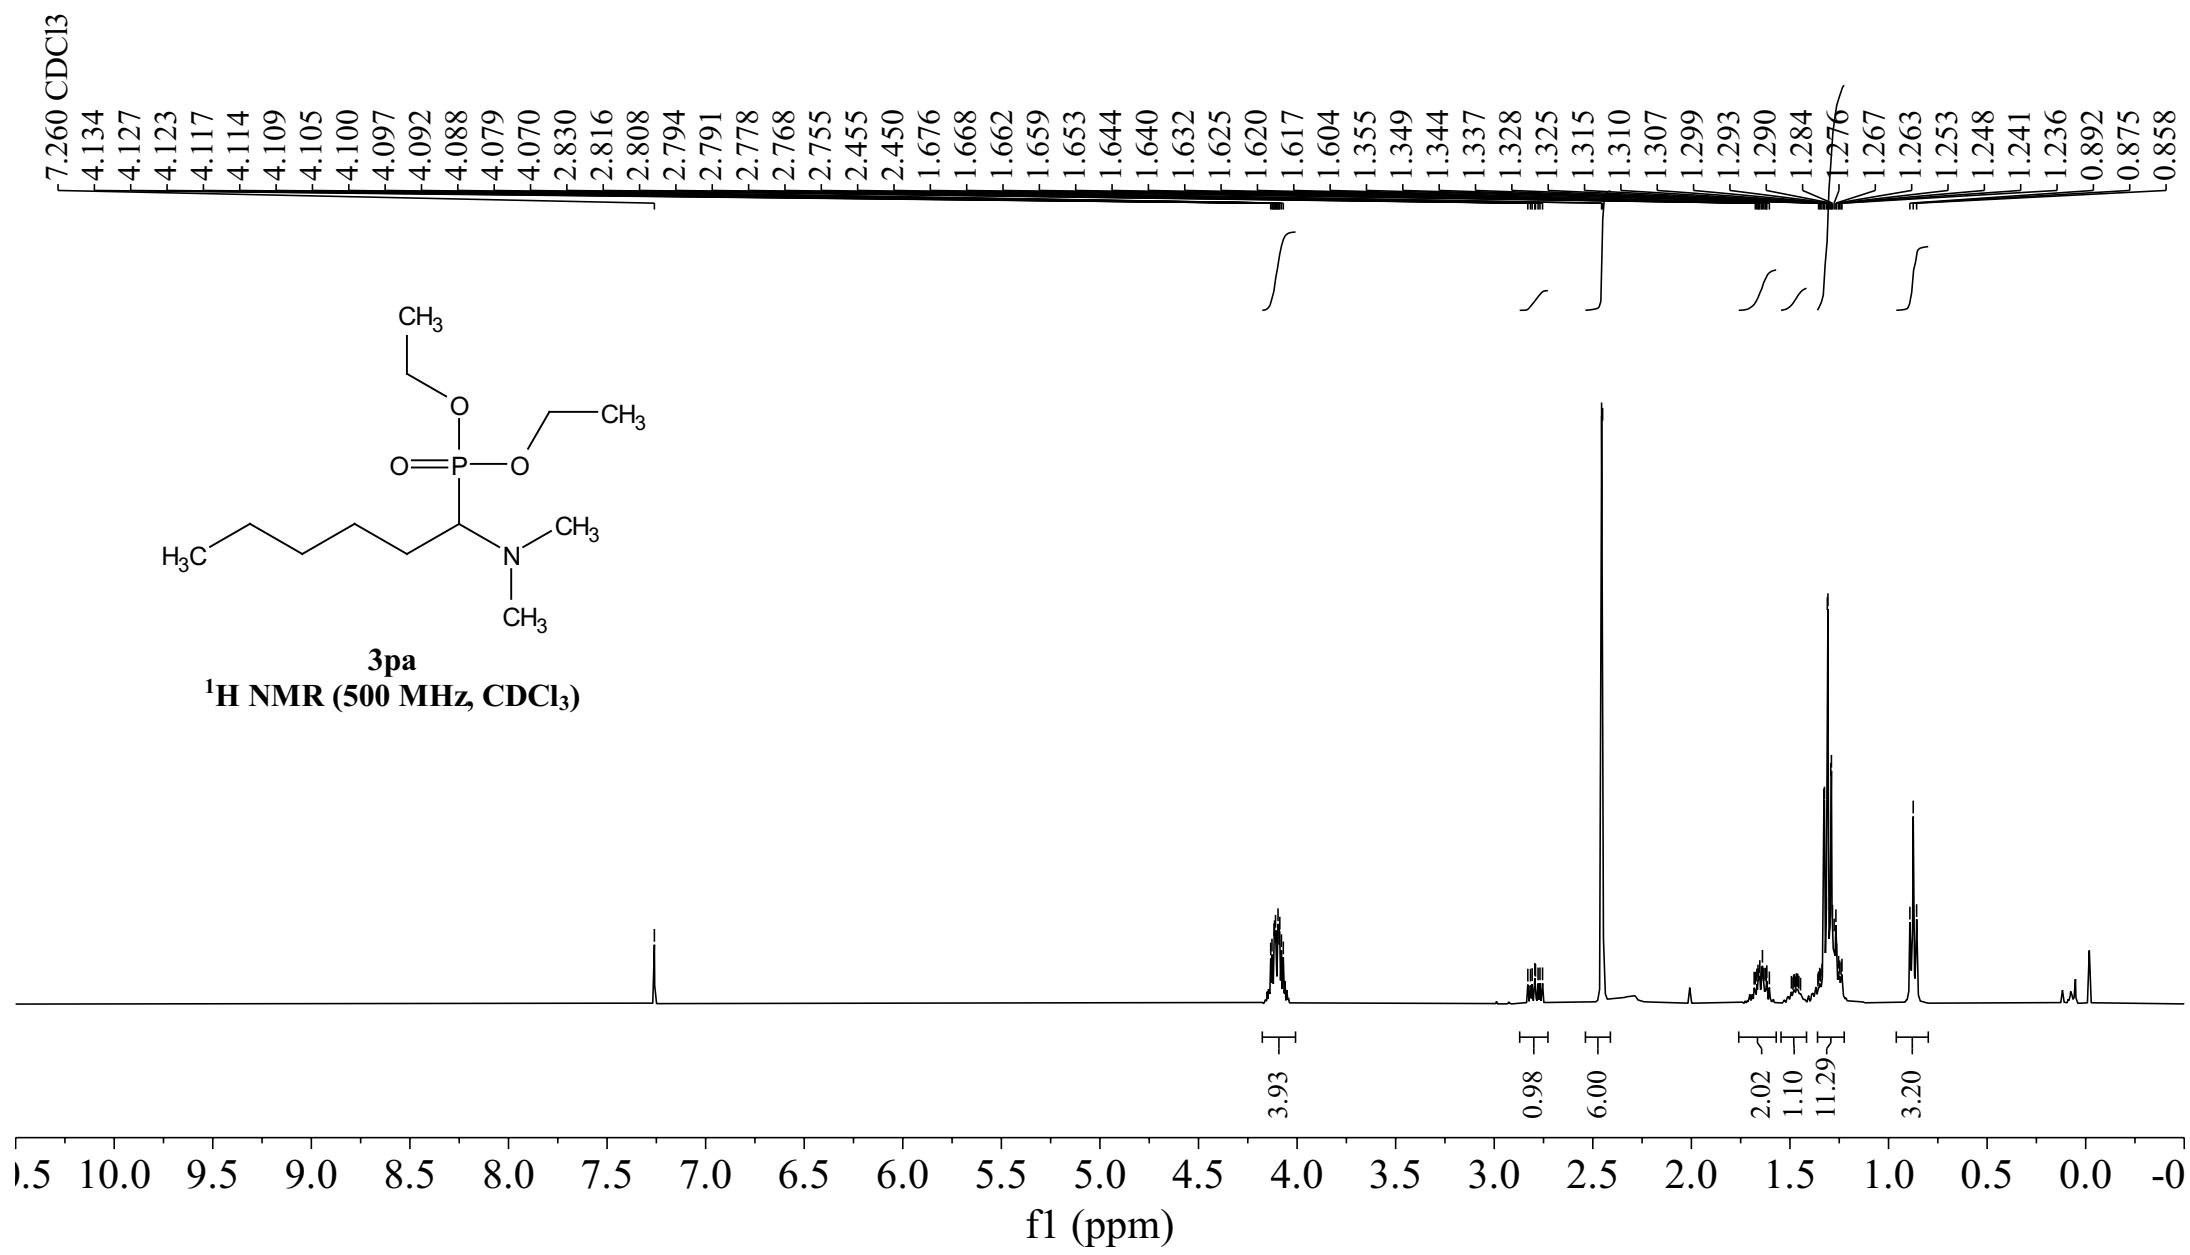

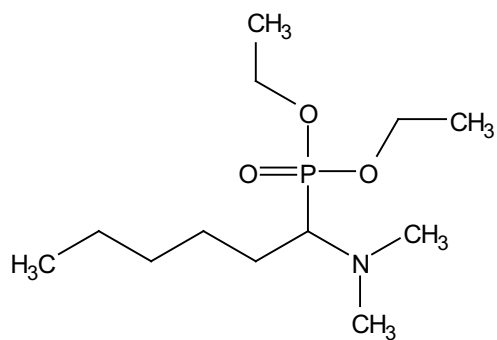

**3pa**  
<sup>13</sup>C NMR (126 MHz, CDCl<sub>3</sub>)

77.414  
 77.160  
 77.160 CDCl<sub>3</sub>  
 76.906  
 62.646  
 61.709  
 61.651  
 61.559  
 61.173  
 61.113  
 42.346  
 42.313  
 31.775  
 27.321  
 27.227  
 26.888  
 26.843  
 22.637  
 16.752  
 16.705  
 16.657  
 14.153

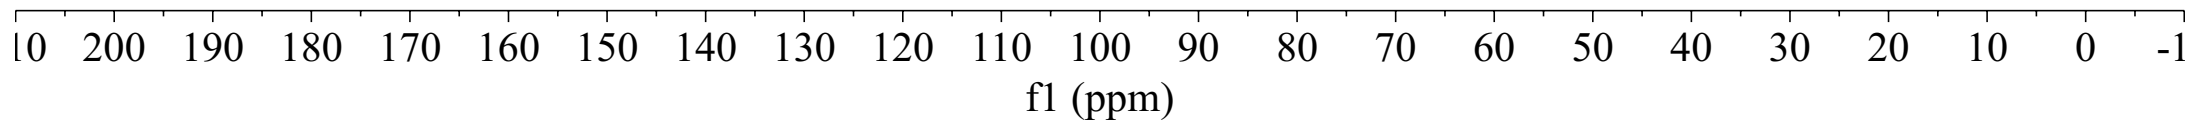

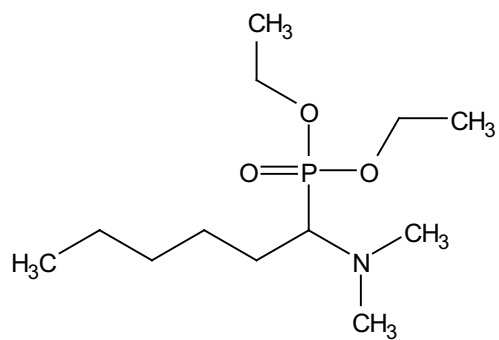

**3pa**  
**<sup>31</sup>P NMR (202 MHz, CDCl<sub>3</sub>)**

—29.782

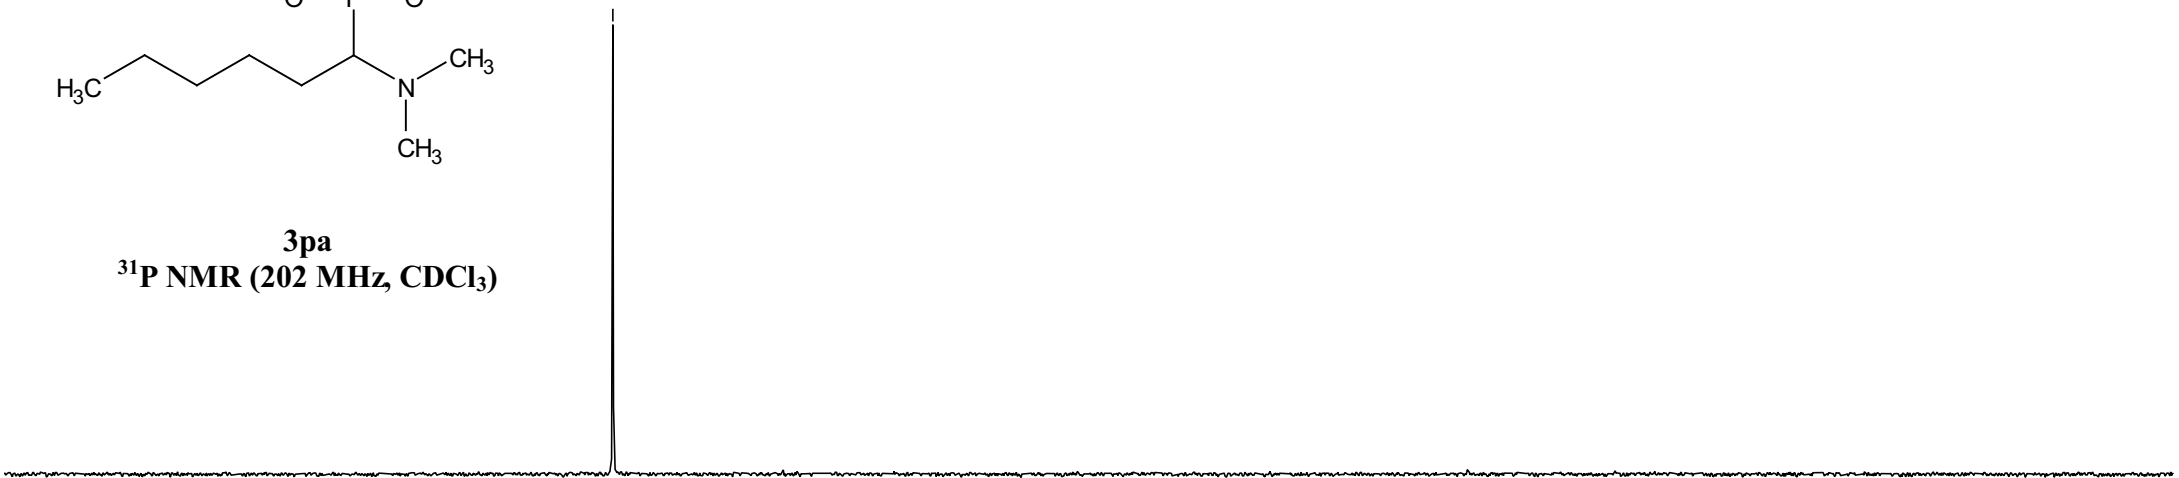

60 55 50 45 40 35 30 25 20 15 10 5 0 -5 -10 -15 -20 -25 -30 -35 -40 -45 -50 -55

f1 (ppm)

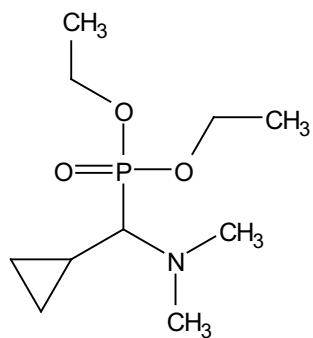

**3qa**  
<sup>1</sup>H NMR (400 MHz, CDCl<sub>3</sub>)

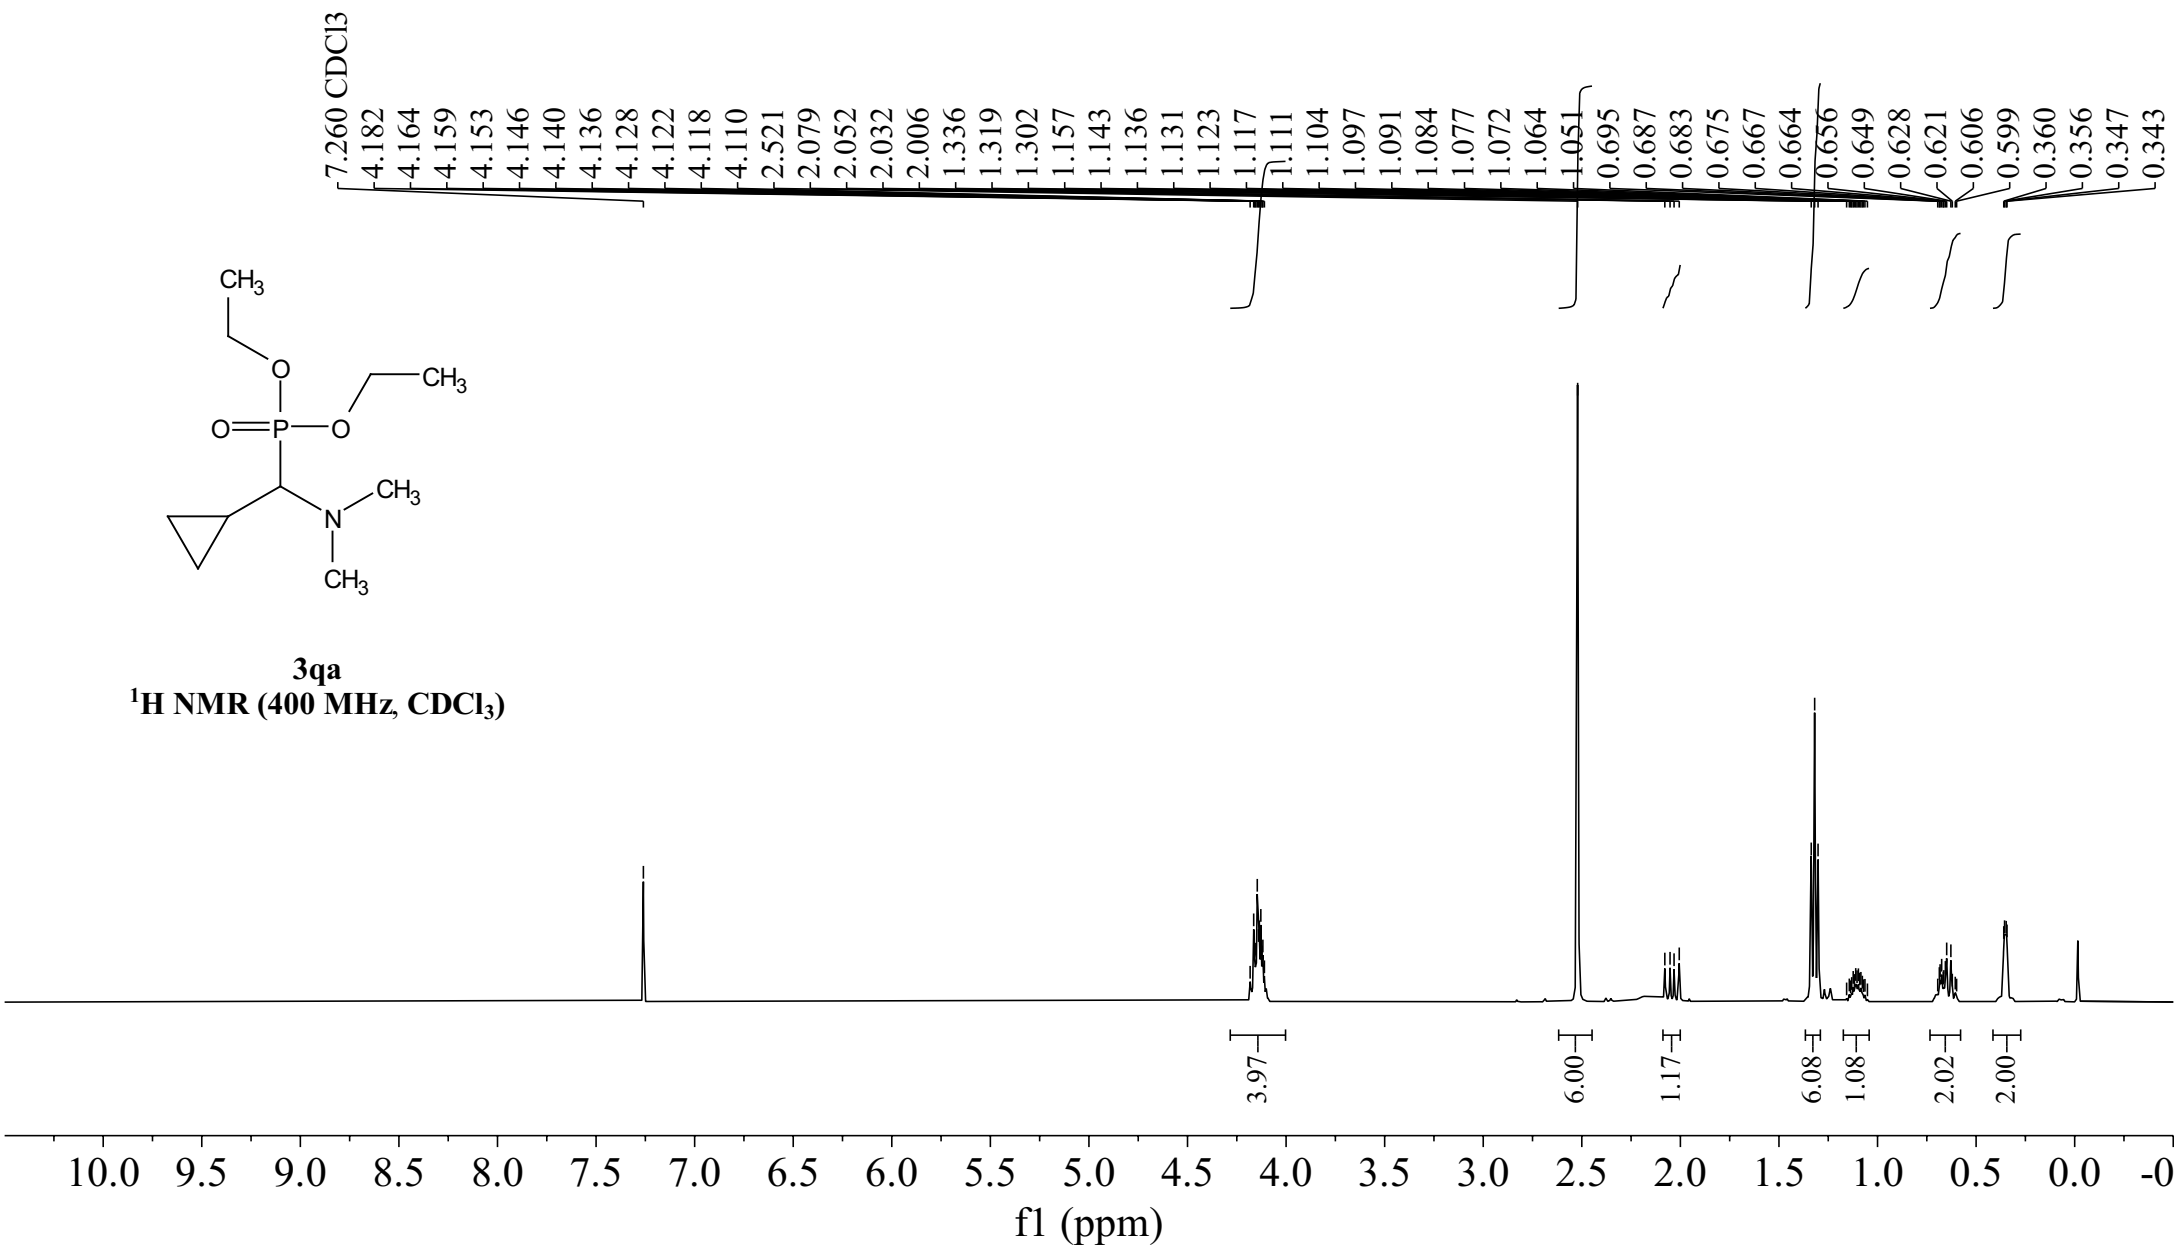

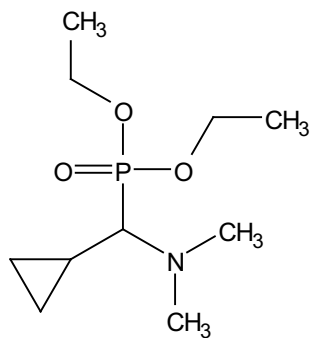

**3qa**

**$^{13}\text{C}$  NMR (100 MHz,  $\text{CDCl}_3$ )**

77.481  
77.161  
77.160  $\text{CDCl}_3$   
76.843  
68.378  
66.879  
62.047  
61.975  
61.386  
61.314  
43.165  
43.097  
16.590  
16.567  
16.533  
16.509  
6.979  
6.910  
5.564  
5.402  
3.361

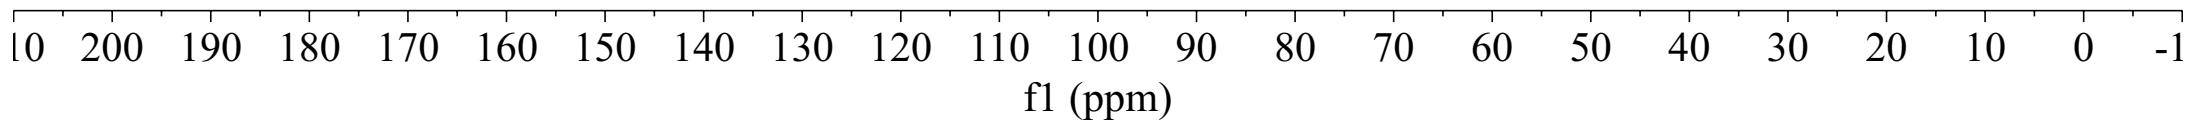

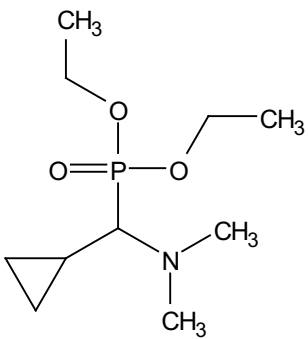

**3qa**

<sup>31</sup>P NMR (162 MHz, CDCl<sub>3</sub>)

—25.955

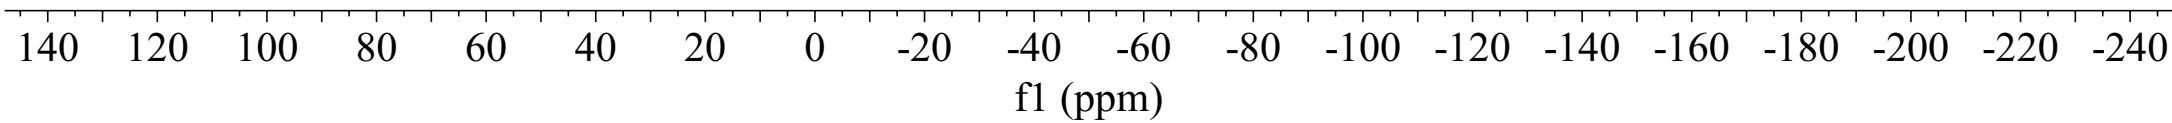

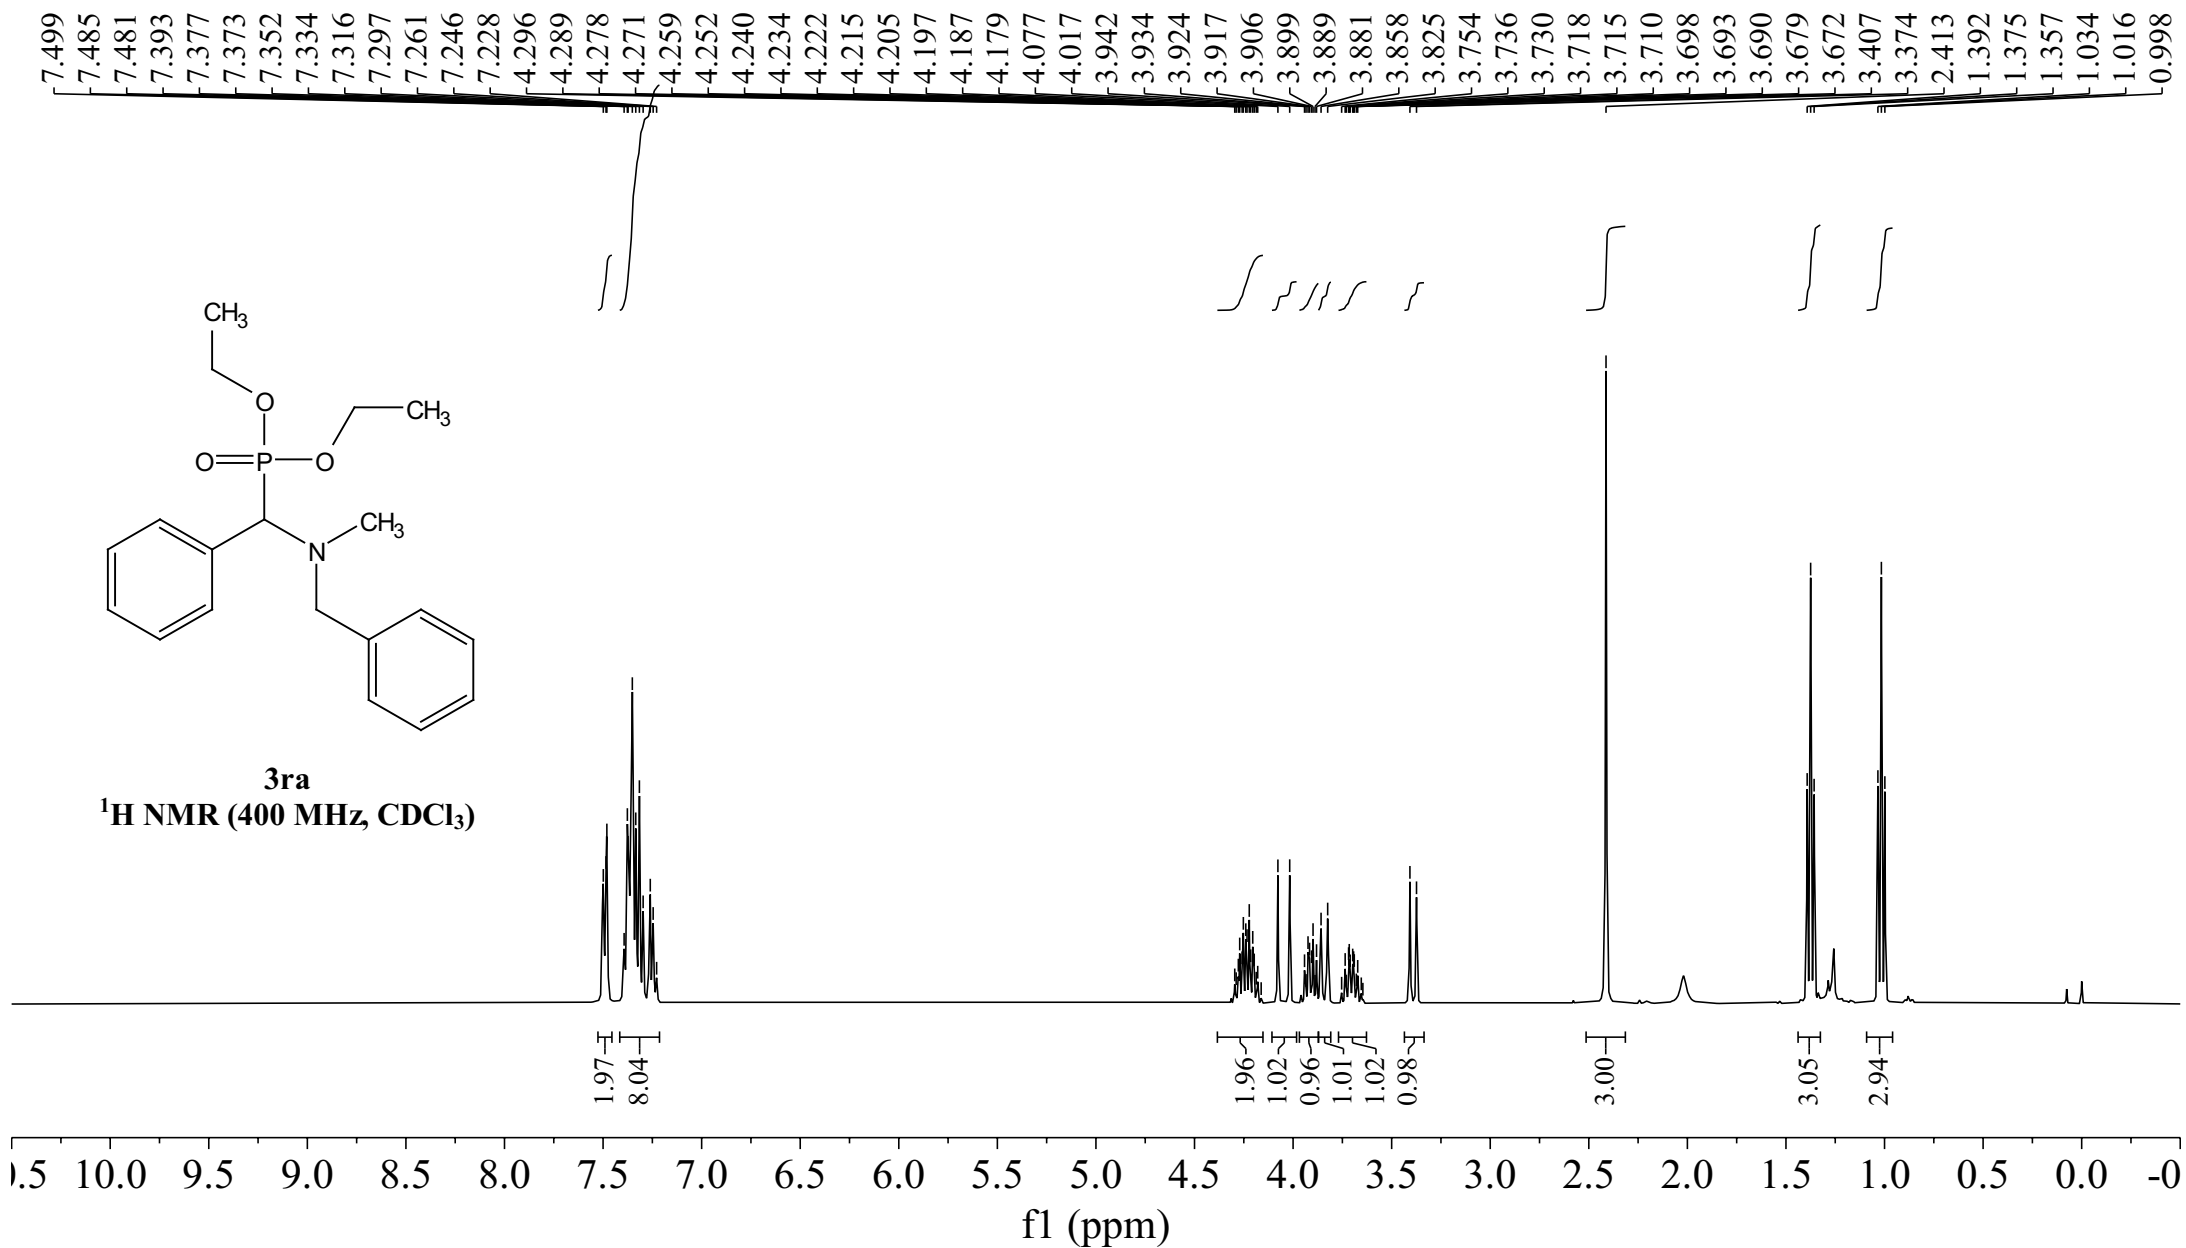



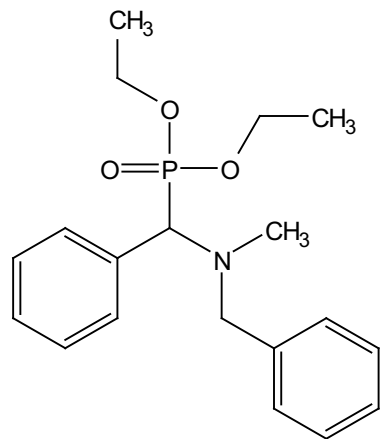

3ra

<sup>13</sup>C NMR (100 MHz, CDCl<sub>3</sub>)

139.145  
132.124  
132.082  
130.975  
130.889  
129.046  
128.358  
128.228  
128.113  
128.099  
127.173

77.477  
77.160 CDCl<sub>3</sub>  
76.842  
65.778  
64.169  
62.703  
62.632  
62.355  
62.285  
60.003  
59.878  
39.991  
39.939

16.708  
16.647  
16.283  
16.227

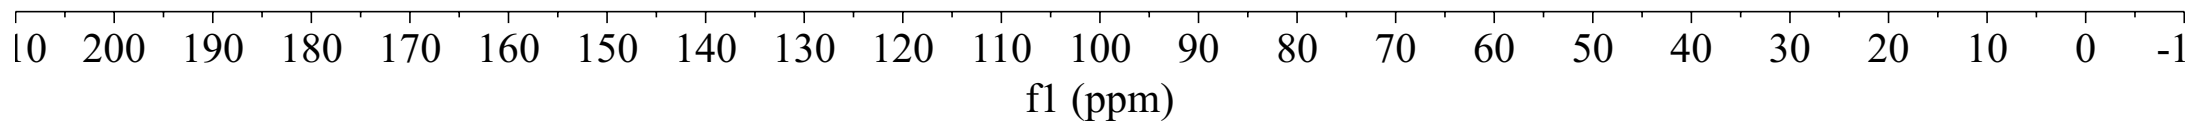

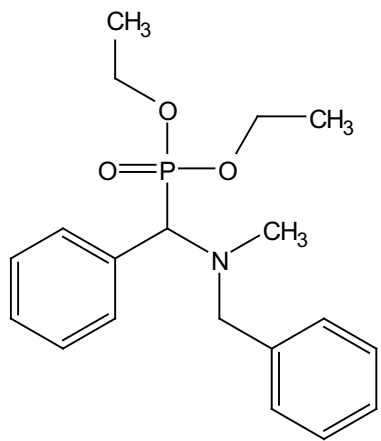

**3ra**  
**<sup>31</sup>P NMR (162 MHz, CDCl<sub>3</sub>)**

-23.123

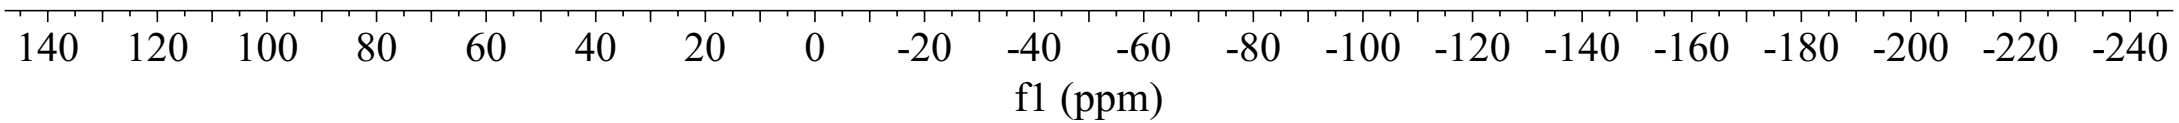

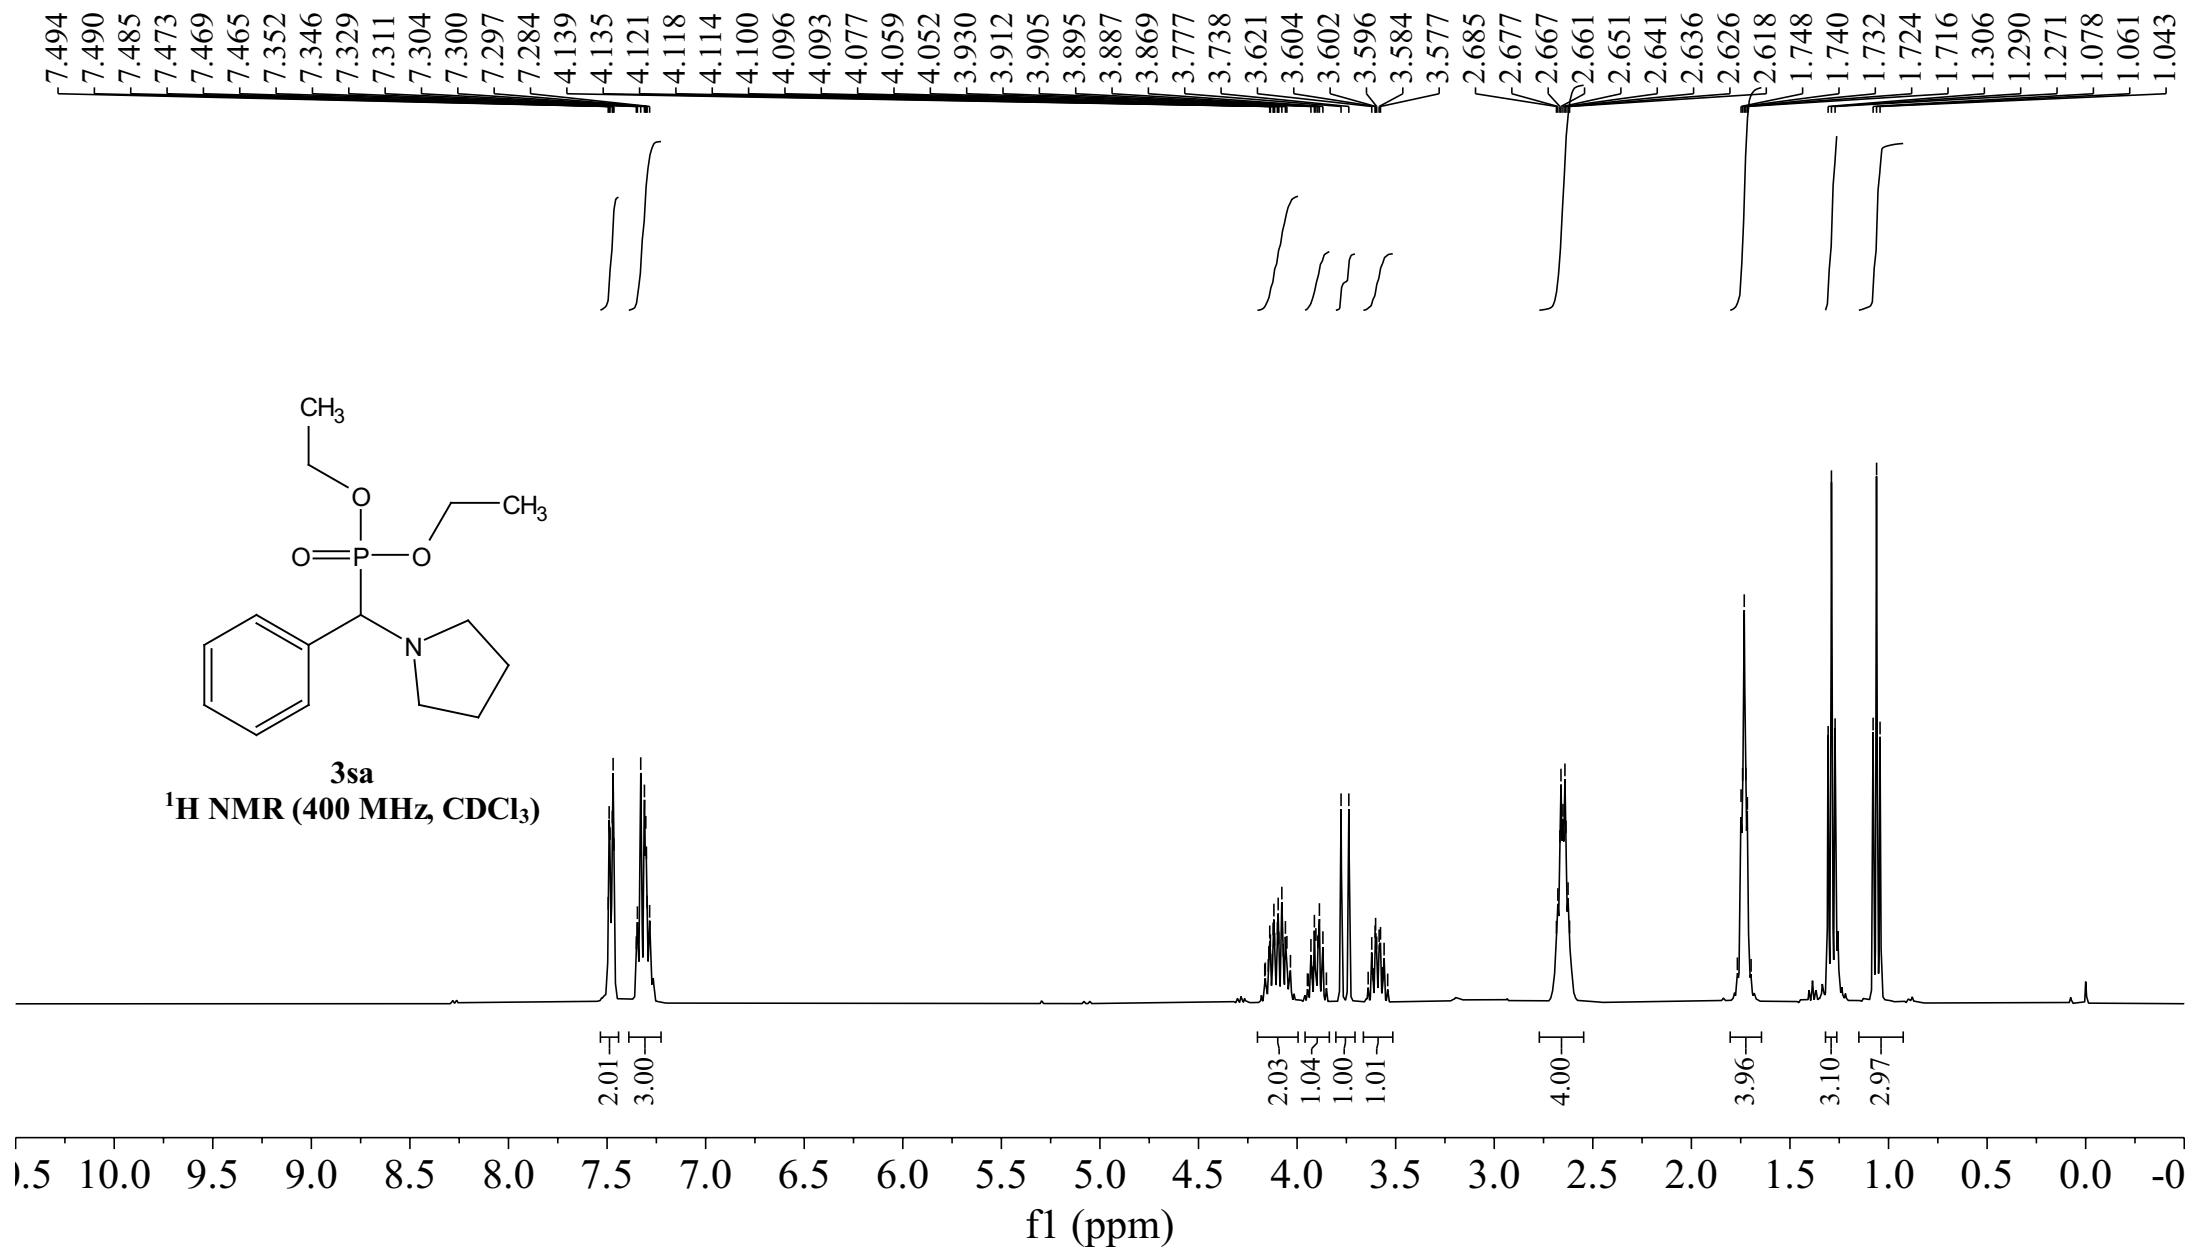

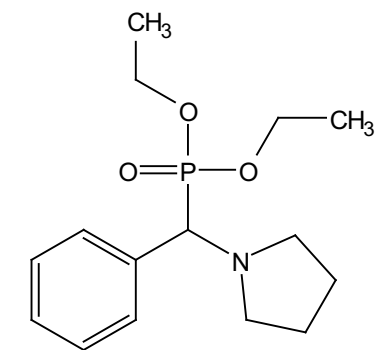

**3sa**

**$^{13}\text{C}$  NMR (100 MHz,  $\text{CDCl}_3$ )**

135.233  
130.025  
129.952  
128.213  
128.196  
127.929  
127.904

77.478  
77.160  $\text{CDCl}_3$   
76.842  
68.343  
66.771  
62.782  
62.712  
62.150  
62.076  
53.098  
53.010

23.252  
16.463  
16.405  
16.263  
16.206

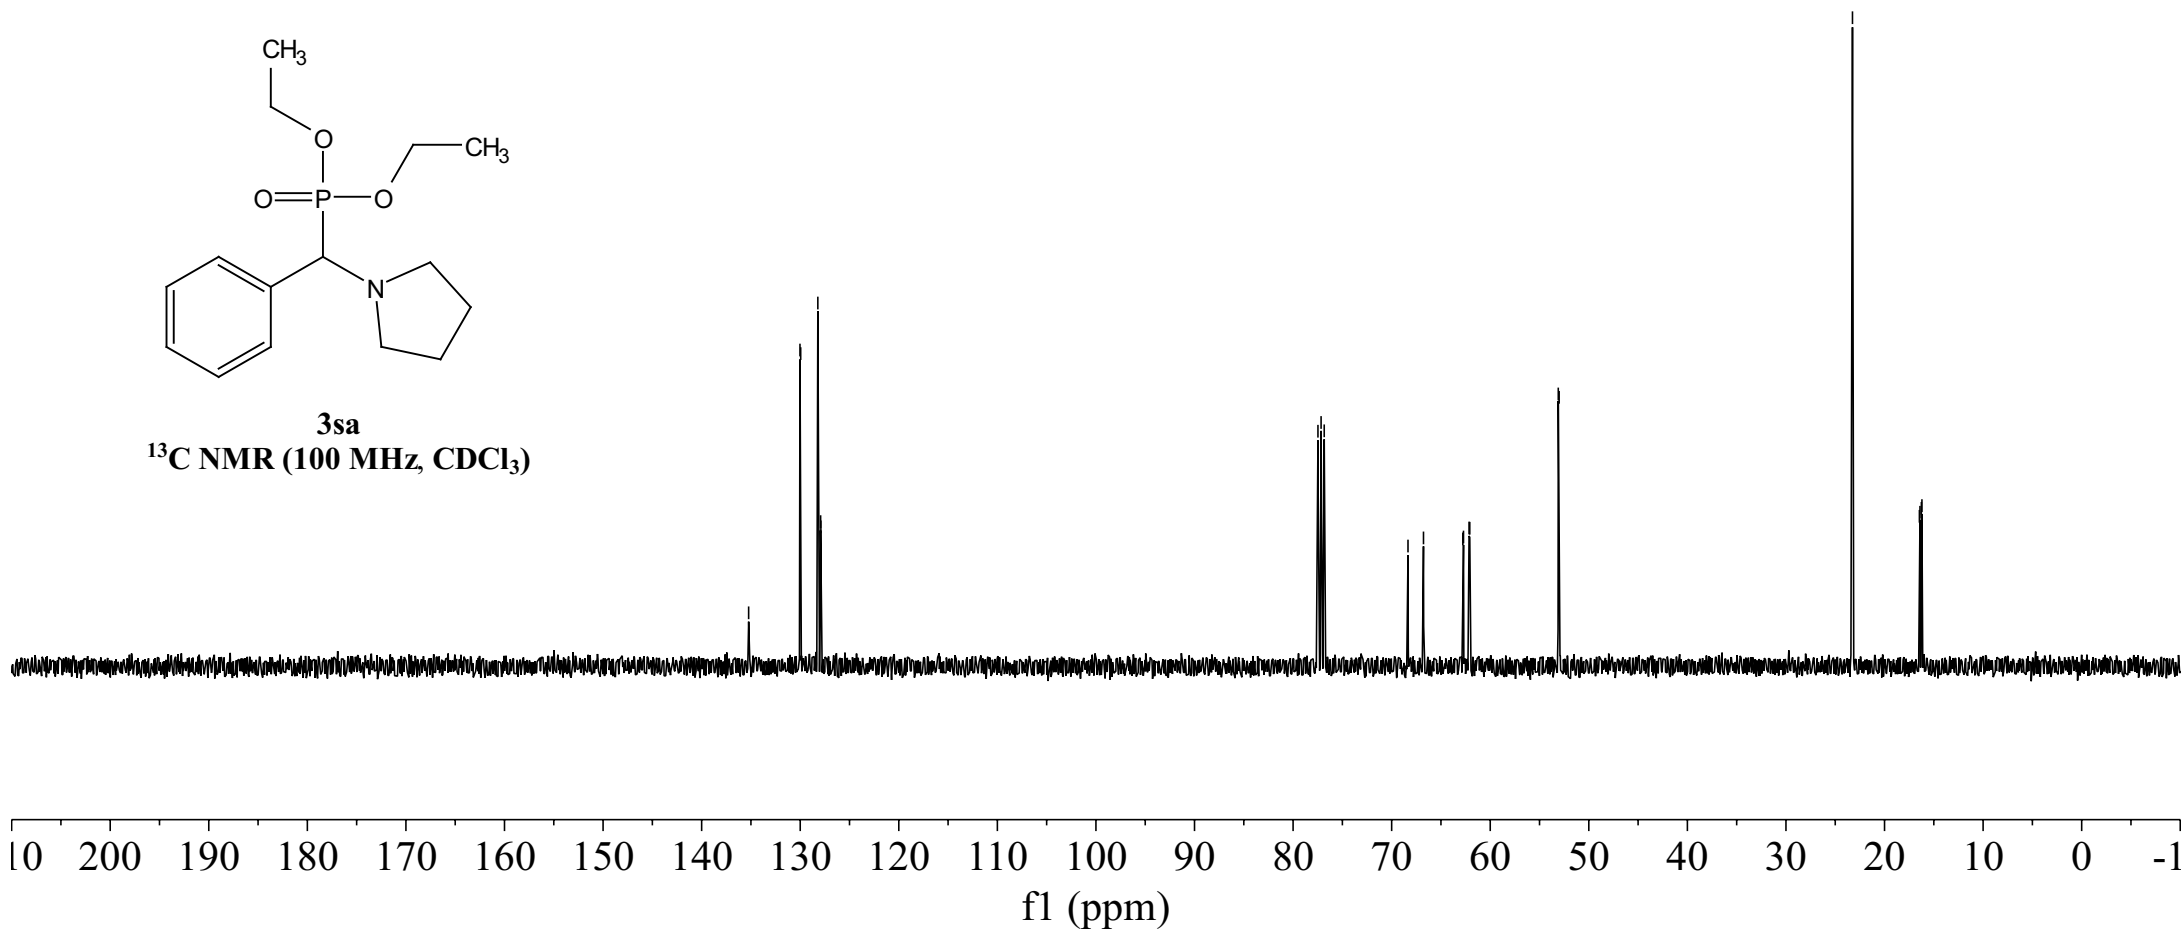

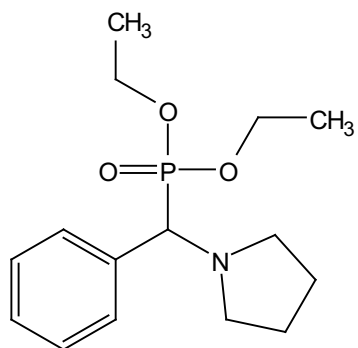

**3sa**  
**<sup>31</sup>P NMR (162 MHz, CDCl<sub>3</sub>)**

—22.859



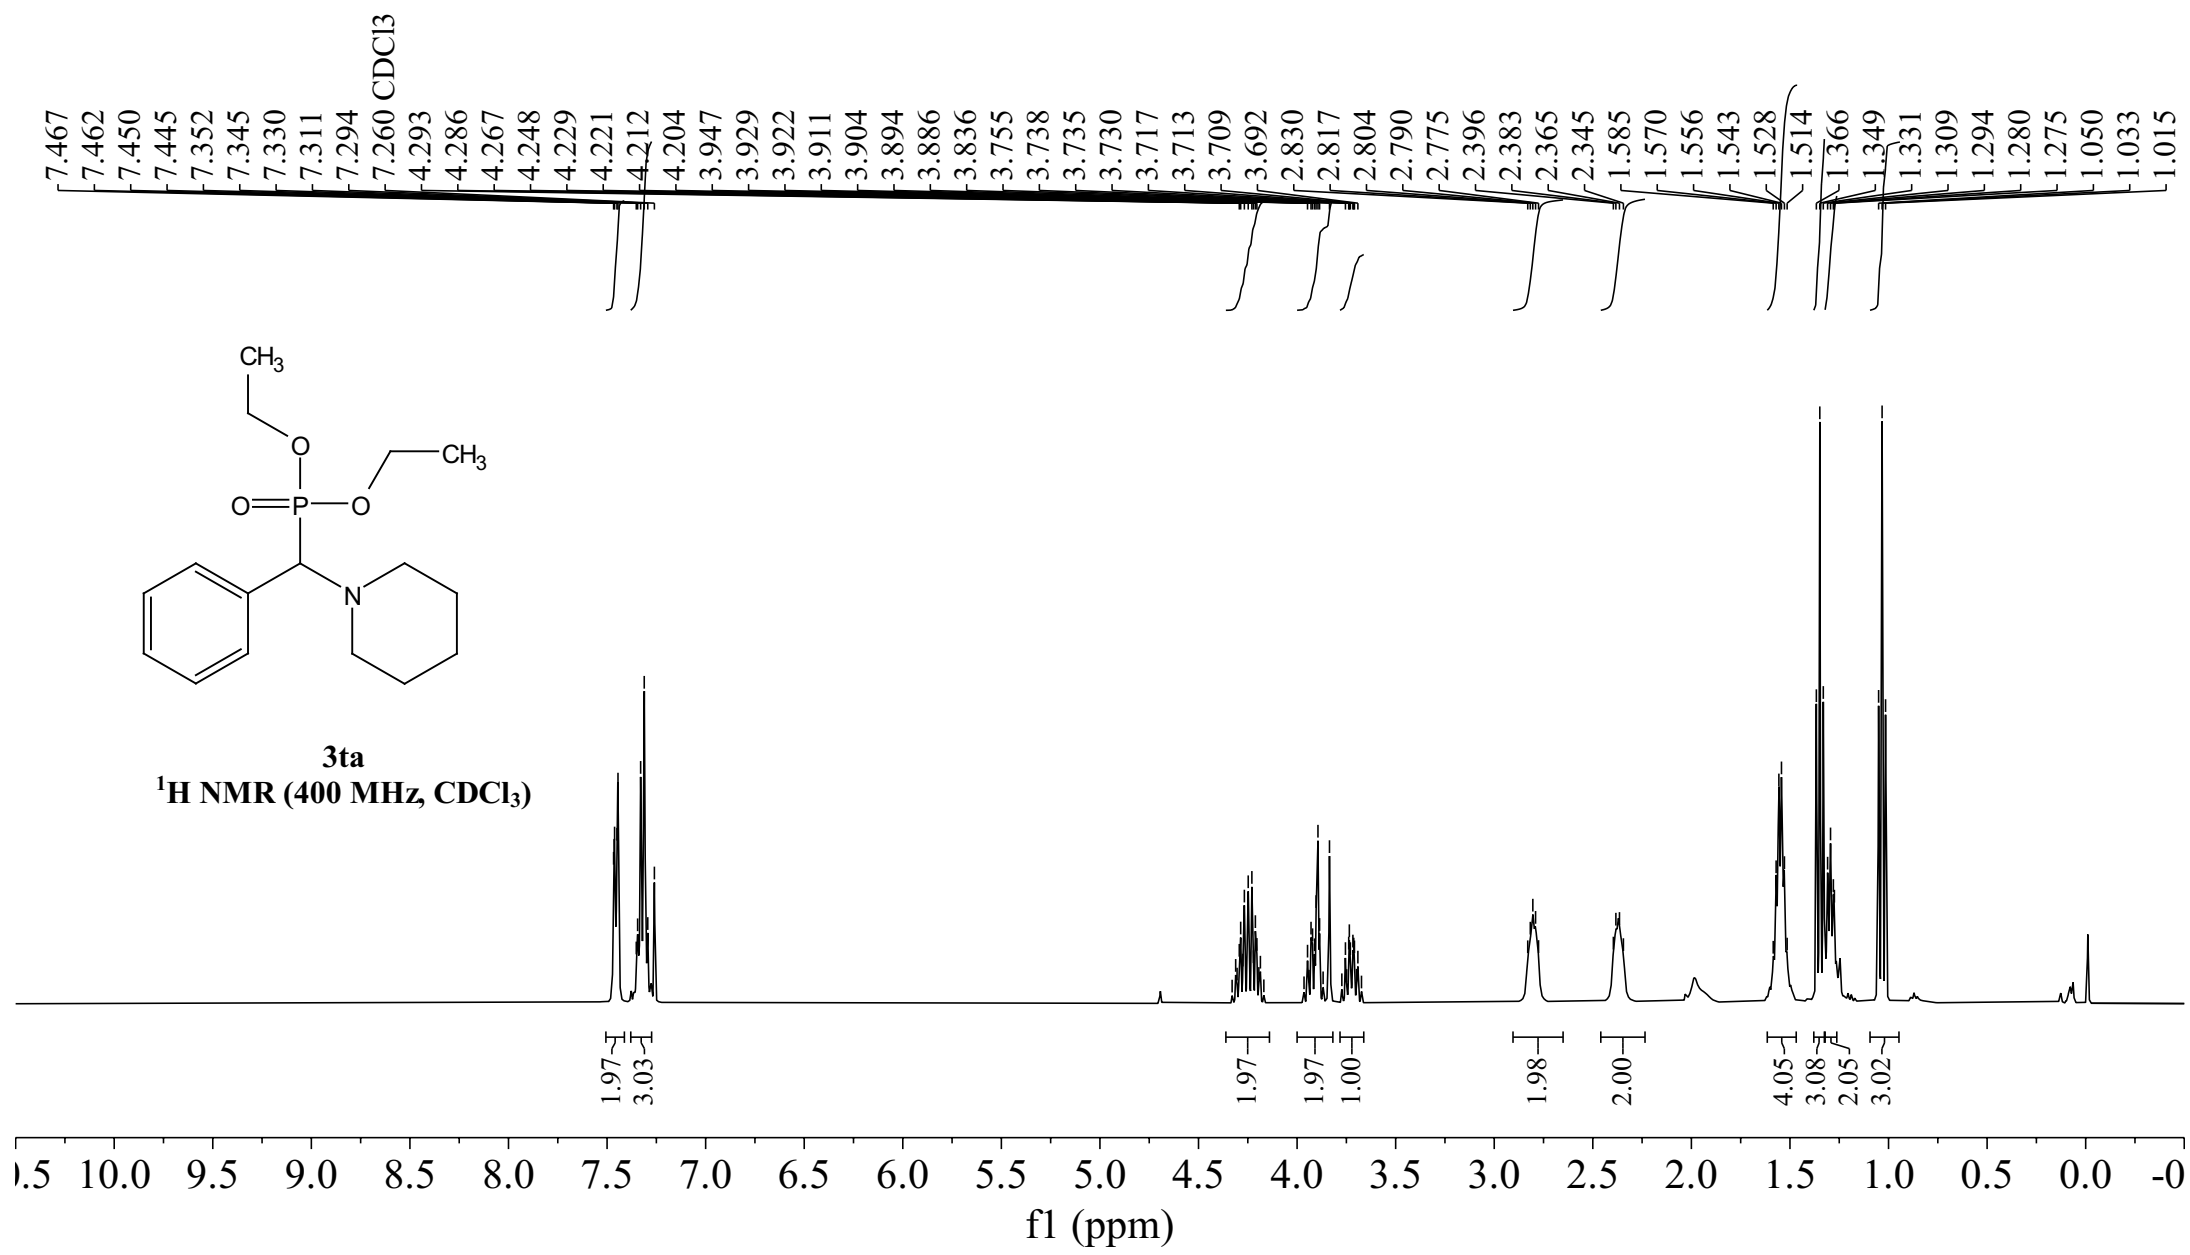

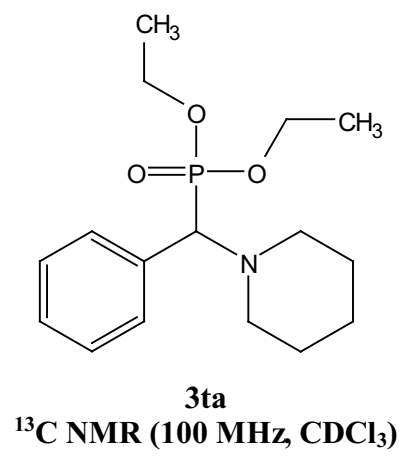

132.611  
 132.576  
 130.672  
 130.581  
 128.018  
 127.880  
 127.866

77.477  
 77.160 CDCl<sub>3</sub>  
 76.842  
 69.719  
 68.111  
 63.248  
 63.178  
 62.093  
 62.024  
 52.670  
 52.579

26.495  
 24.115  
 16.676  
 16.617  
 16.250  
 16.193

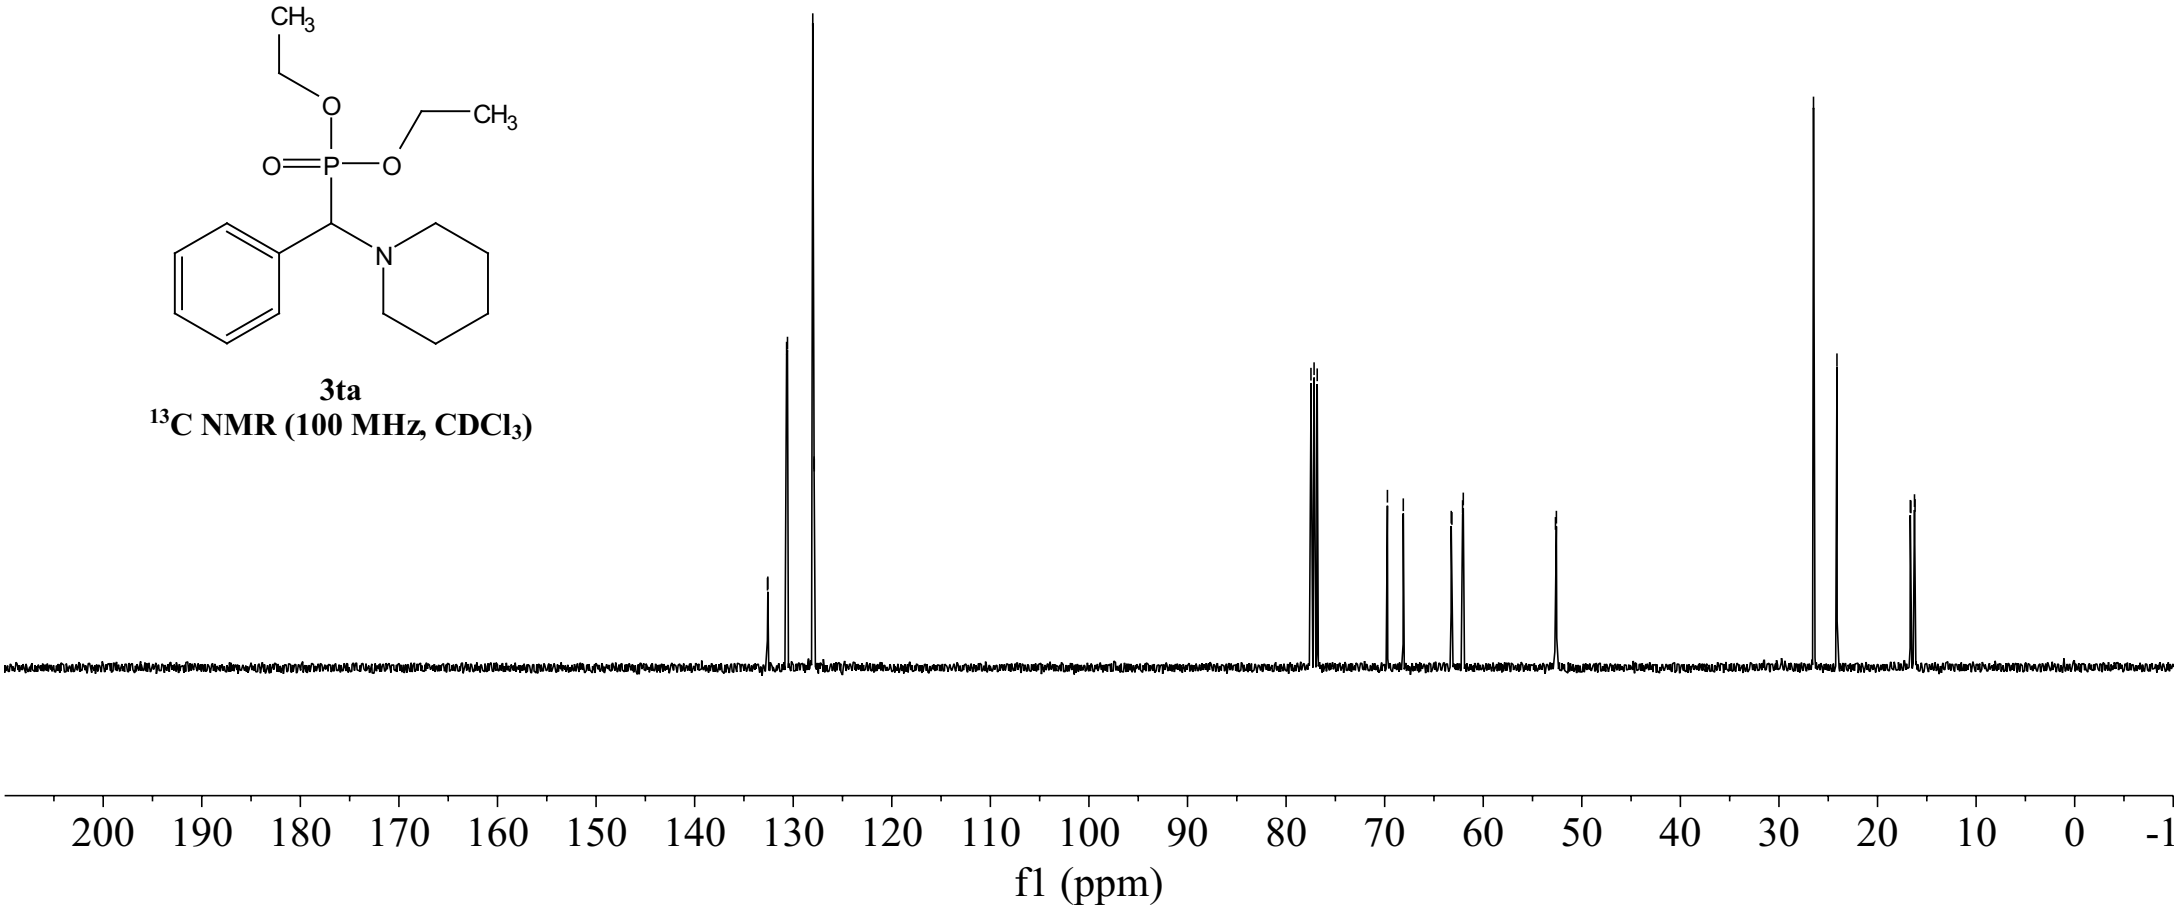

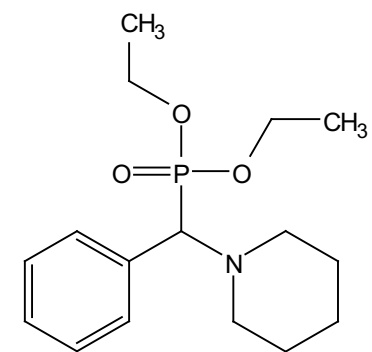

**3ta**

<sup>31</sup>P NMR (162 MHz, CDCl<sub>3</sub>)

—22.433





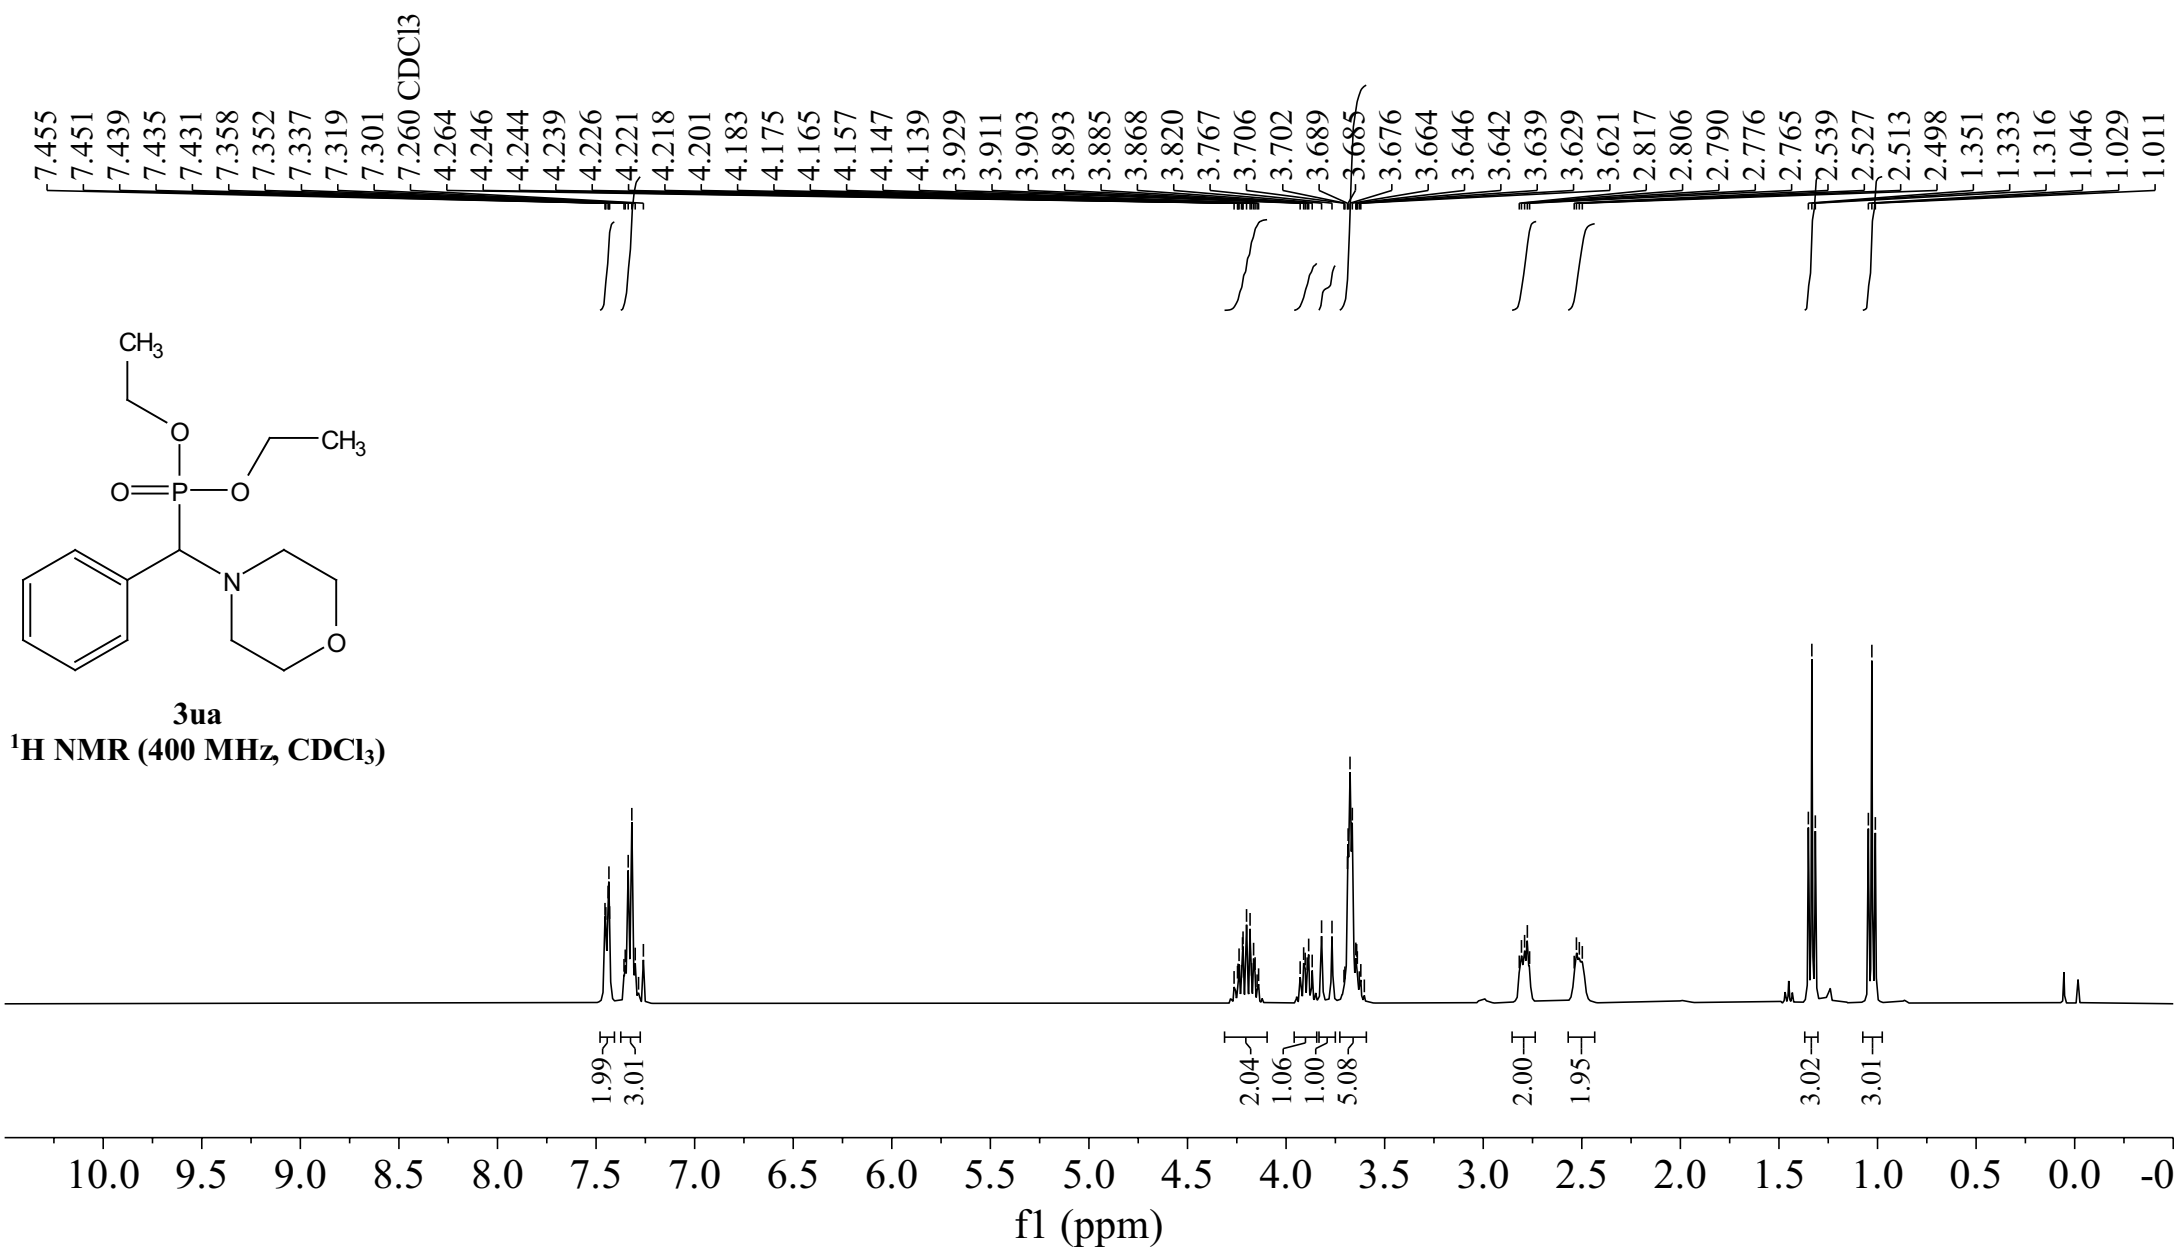

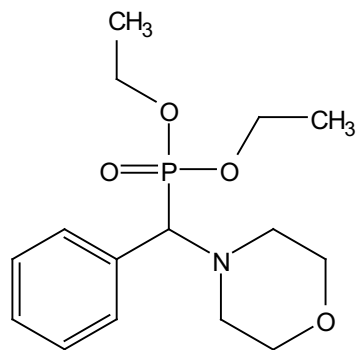

**3ua**  
**<sup>13</sup>C NMR (100 MHz, CDCl<sub>3</sub>)**

132.537  
130.619  
130.535  
128.352  
128.297  
128.280

77.478  
77.160 CDCl<sub>3</sub>  
76.842  
69.535  
67.936  
67.347  
63.008  
62.937  
62.557  
62.486  
52.037  
51.945

16.697  
16.638  
16.304  
16.248

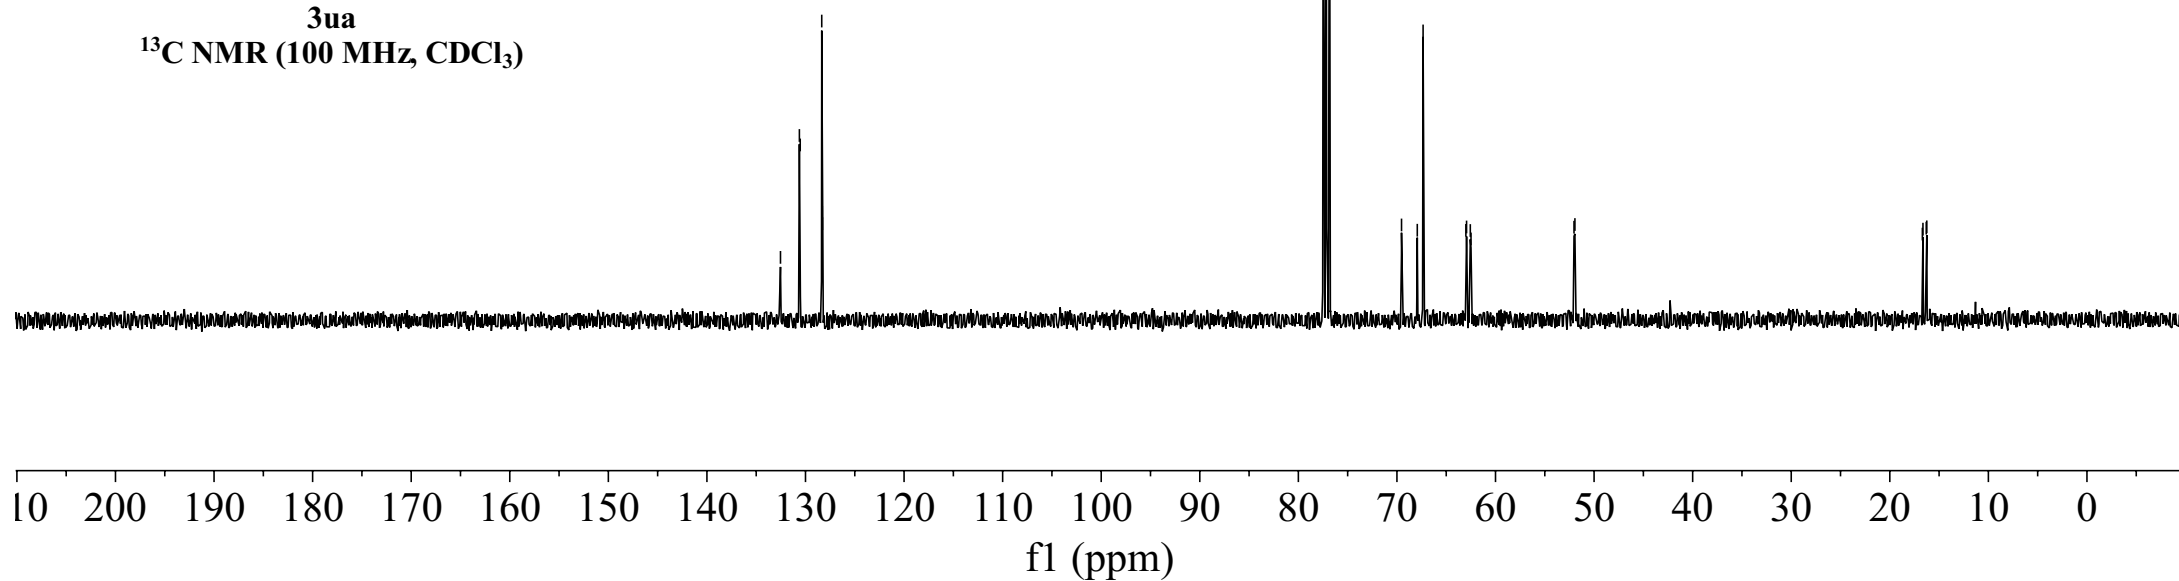

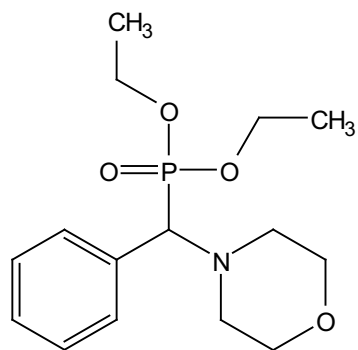

-21.819

**3ua**  
**<sup>31</sup>P NMR (162 MHz, CDCl<sub>3</sub>)**



7.336  
7.325  
7.319  
7.312  
7.260 CDCl<sub>3</sub>  
7.173  
7.168  
7.165  
7.157  
7.150  
7.146  
7.142  
7.115  
7.106  
7.092  
4.071  
4.063  
4.053  
4.045  
4.036  
4.033  
4.028  
4.019  
4.015  
4.012  
4.004  
3.994  
3.987  
3.969  
3.957  
3.943  
3.926  
3.924  
3.906  
3.901  
3.899  
3.441  
3.438  
3.425  
3.412  
3.408  
3.395  
2.849  
2.842  
2.836  
2.830  
2.820  
2.665  
2.653  
2.648  
2.636  
2.620  
2.606  
1.288  
1.270  
1.253  
1.210  
1.192  
1.174

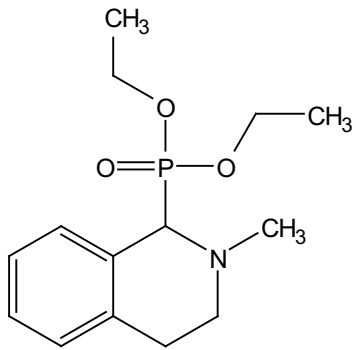

**3va**

<sup>1</sup>H NMR (400 MHz, CDCl<sub>3</sub>)

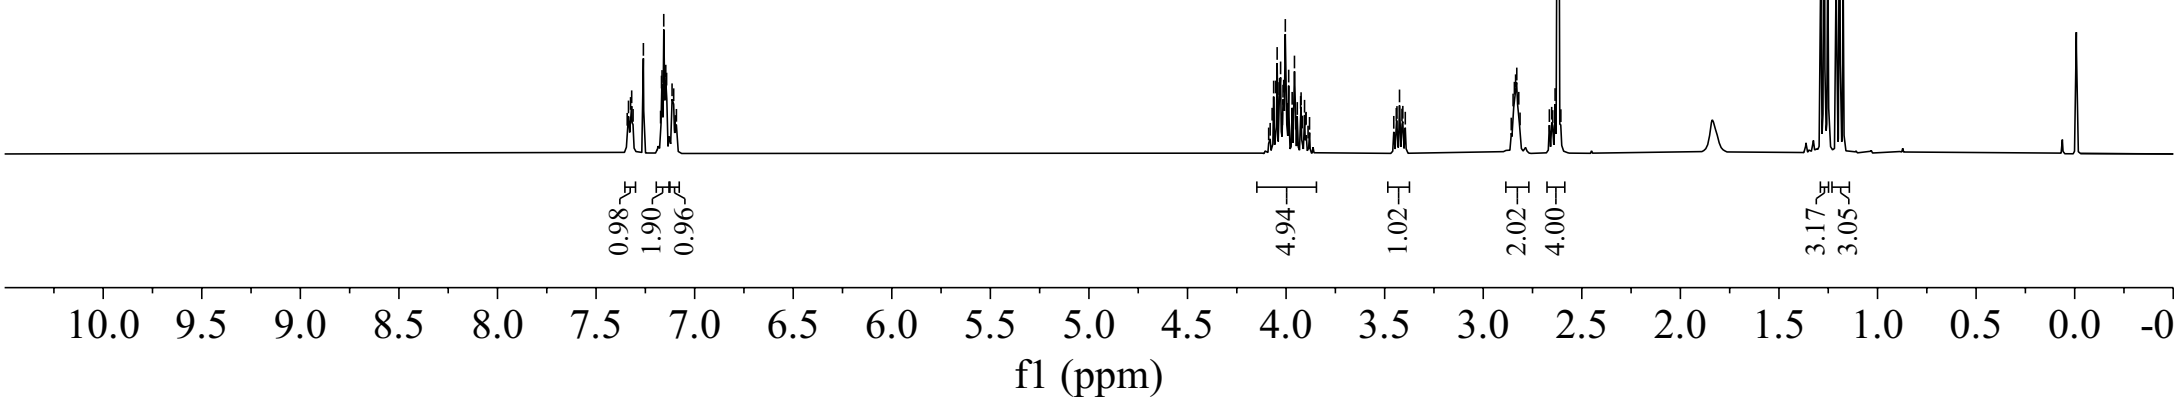

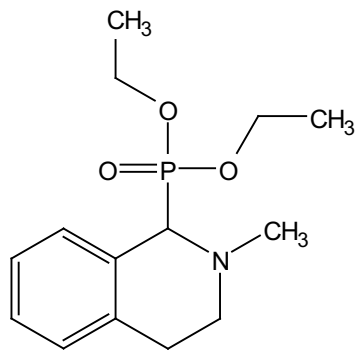

**3va**

<sup>13</sup>C NMR (100 MHz, CDCl<sub>3</sub>)

136.401  
136.339  
129.803  
129.768  
129.104  
129.057  
128.565  
128.531  
126.939  
126.896  
125.711  
125.673

77.481  
77.160 CDCl<sub>3</sub>  
76.840  
63.456  
62.953  
62.876  
62.537  
62.458  
61.838  
49.417  
49.367  
45.089  
44.992

26.927  
16.515  
16.474  
16.453  
16.414

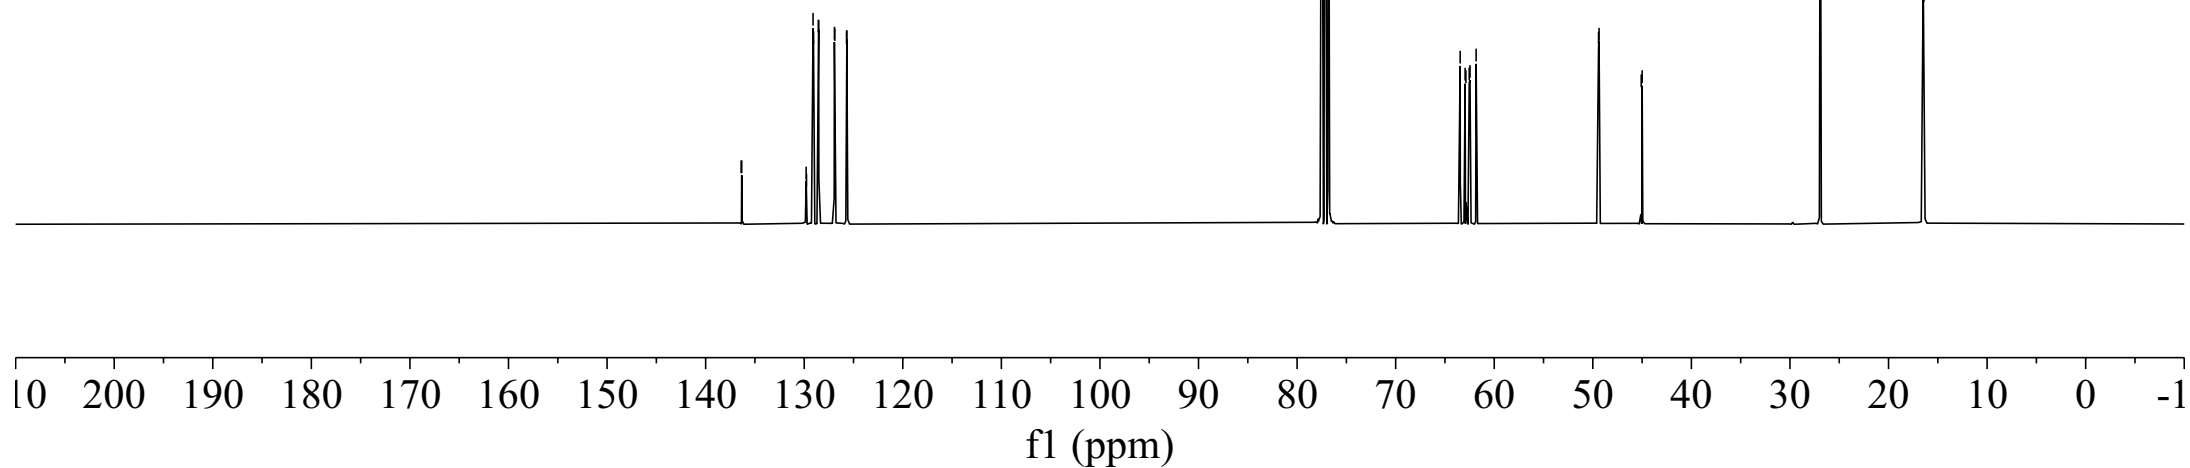

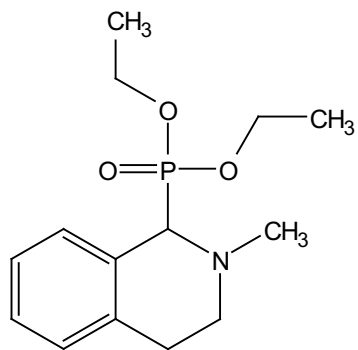

**3va**  
**<sup>31</sup>P NMR (162 MHz, CDCl<sub>3</sub>)**

—23.057



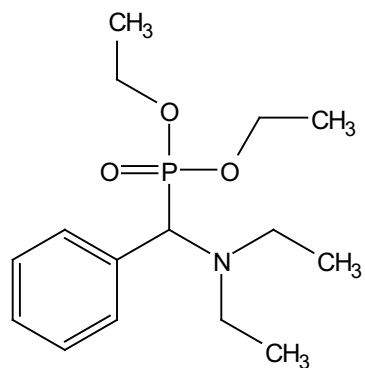

**3wa**

**<sup>1</sup>H NMR (400 MHz, CDCl<sub>3</sub>)**

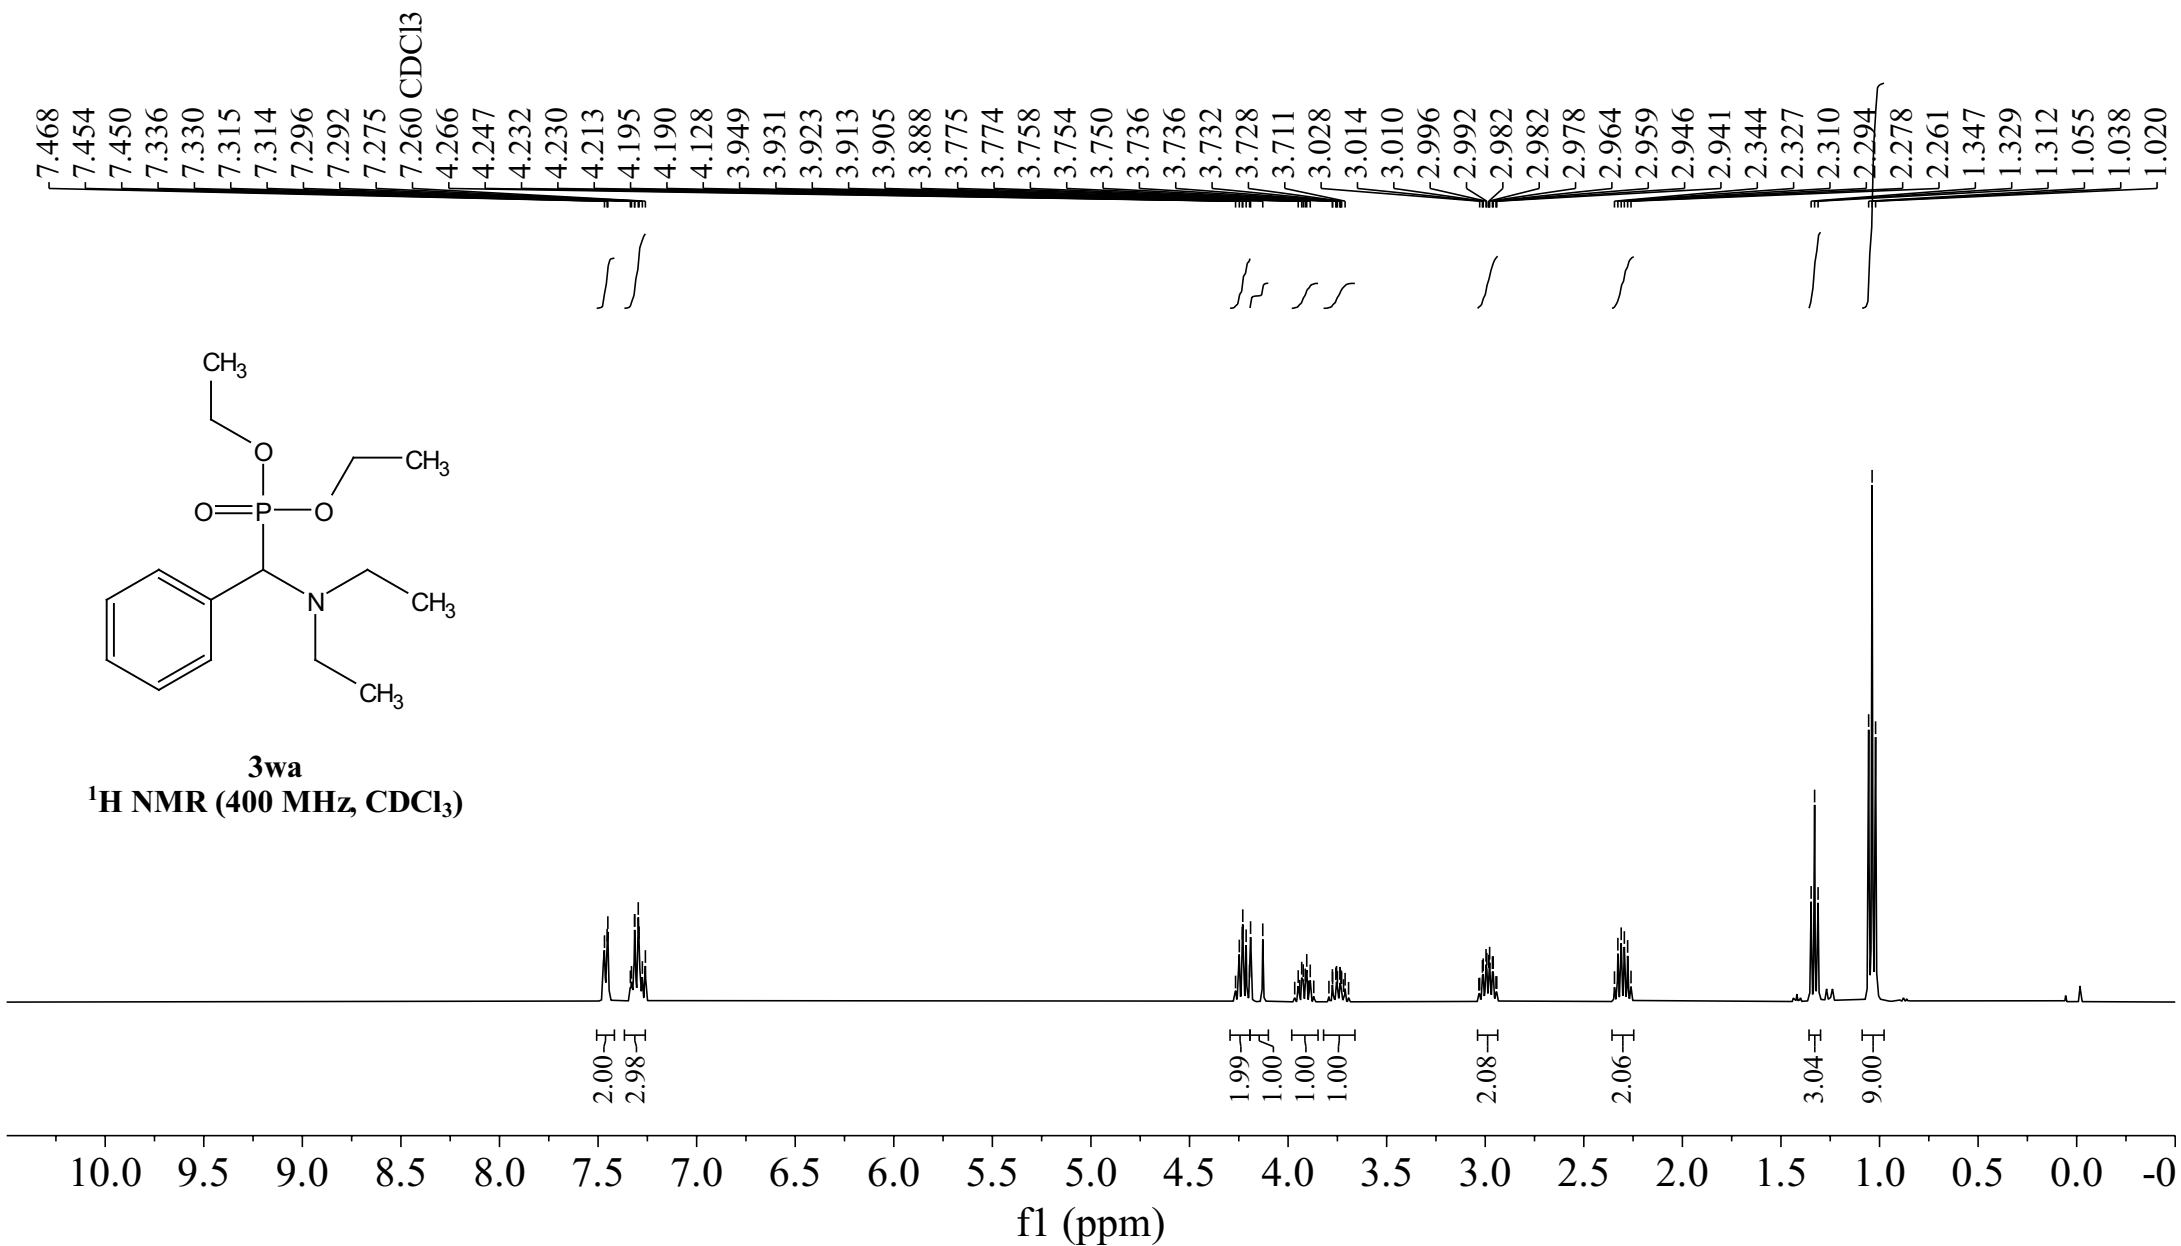

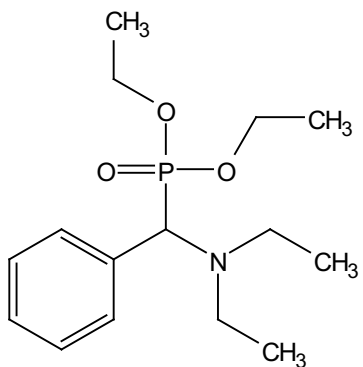

**3wa**  
<sup>13</sup>C NMR (100 MHz, CDCl<sub>3</sub>)

133.589  
 133.538  
 130.721  
 130.632  
 128.125  
 127.813  
 127.799

77.478  
 77.160 CDCl<sub>3</sub>  
 76.842  
 63.272  
 63.203  
 63.060  
 62.030  
 61.958  
 61.439  
 44.900  
 44.816

16.678  
 16.618  
 16.307  
 16.250  
 13.431

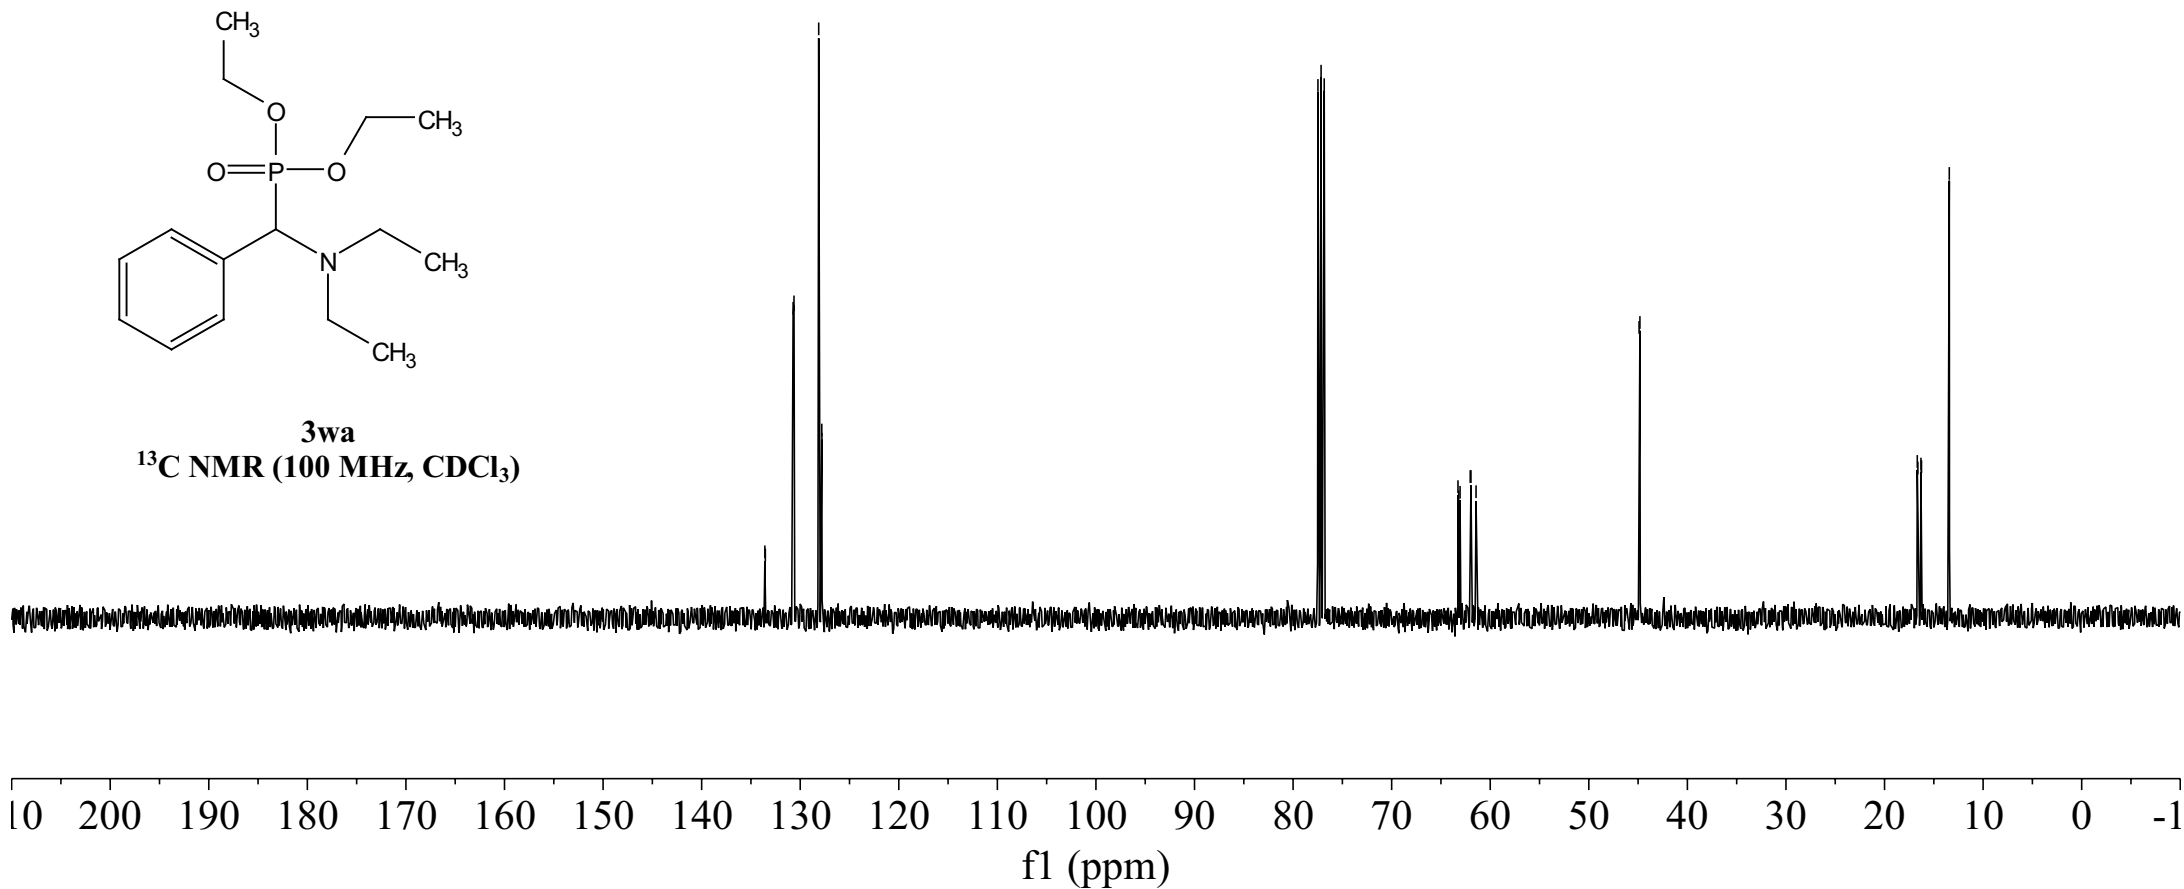



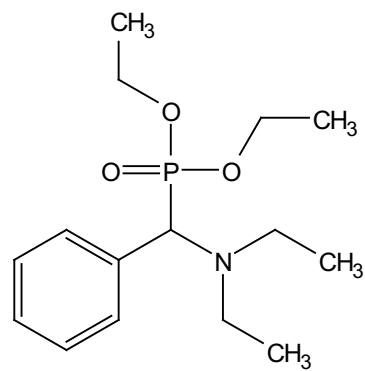

3wa

<sup>31</sup>P NMR (162 MHz, CDCl<sub>3</sub>)

—23.629



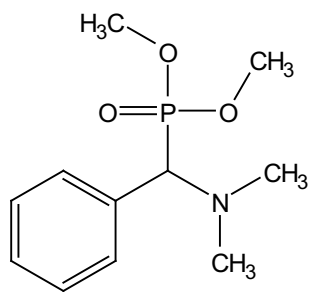

**3ab**

<sup>1</sup>H NMR (400 MHz, CDCl<sub>3</sub>)

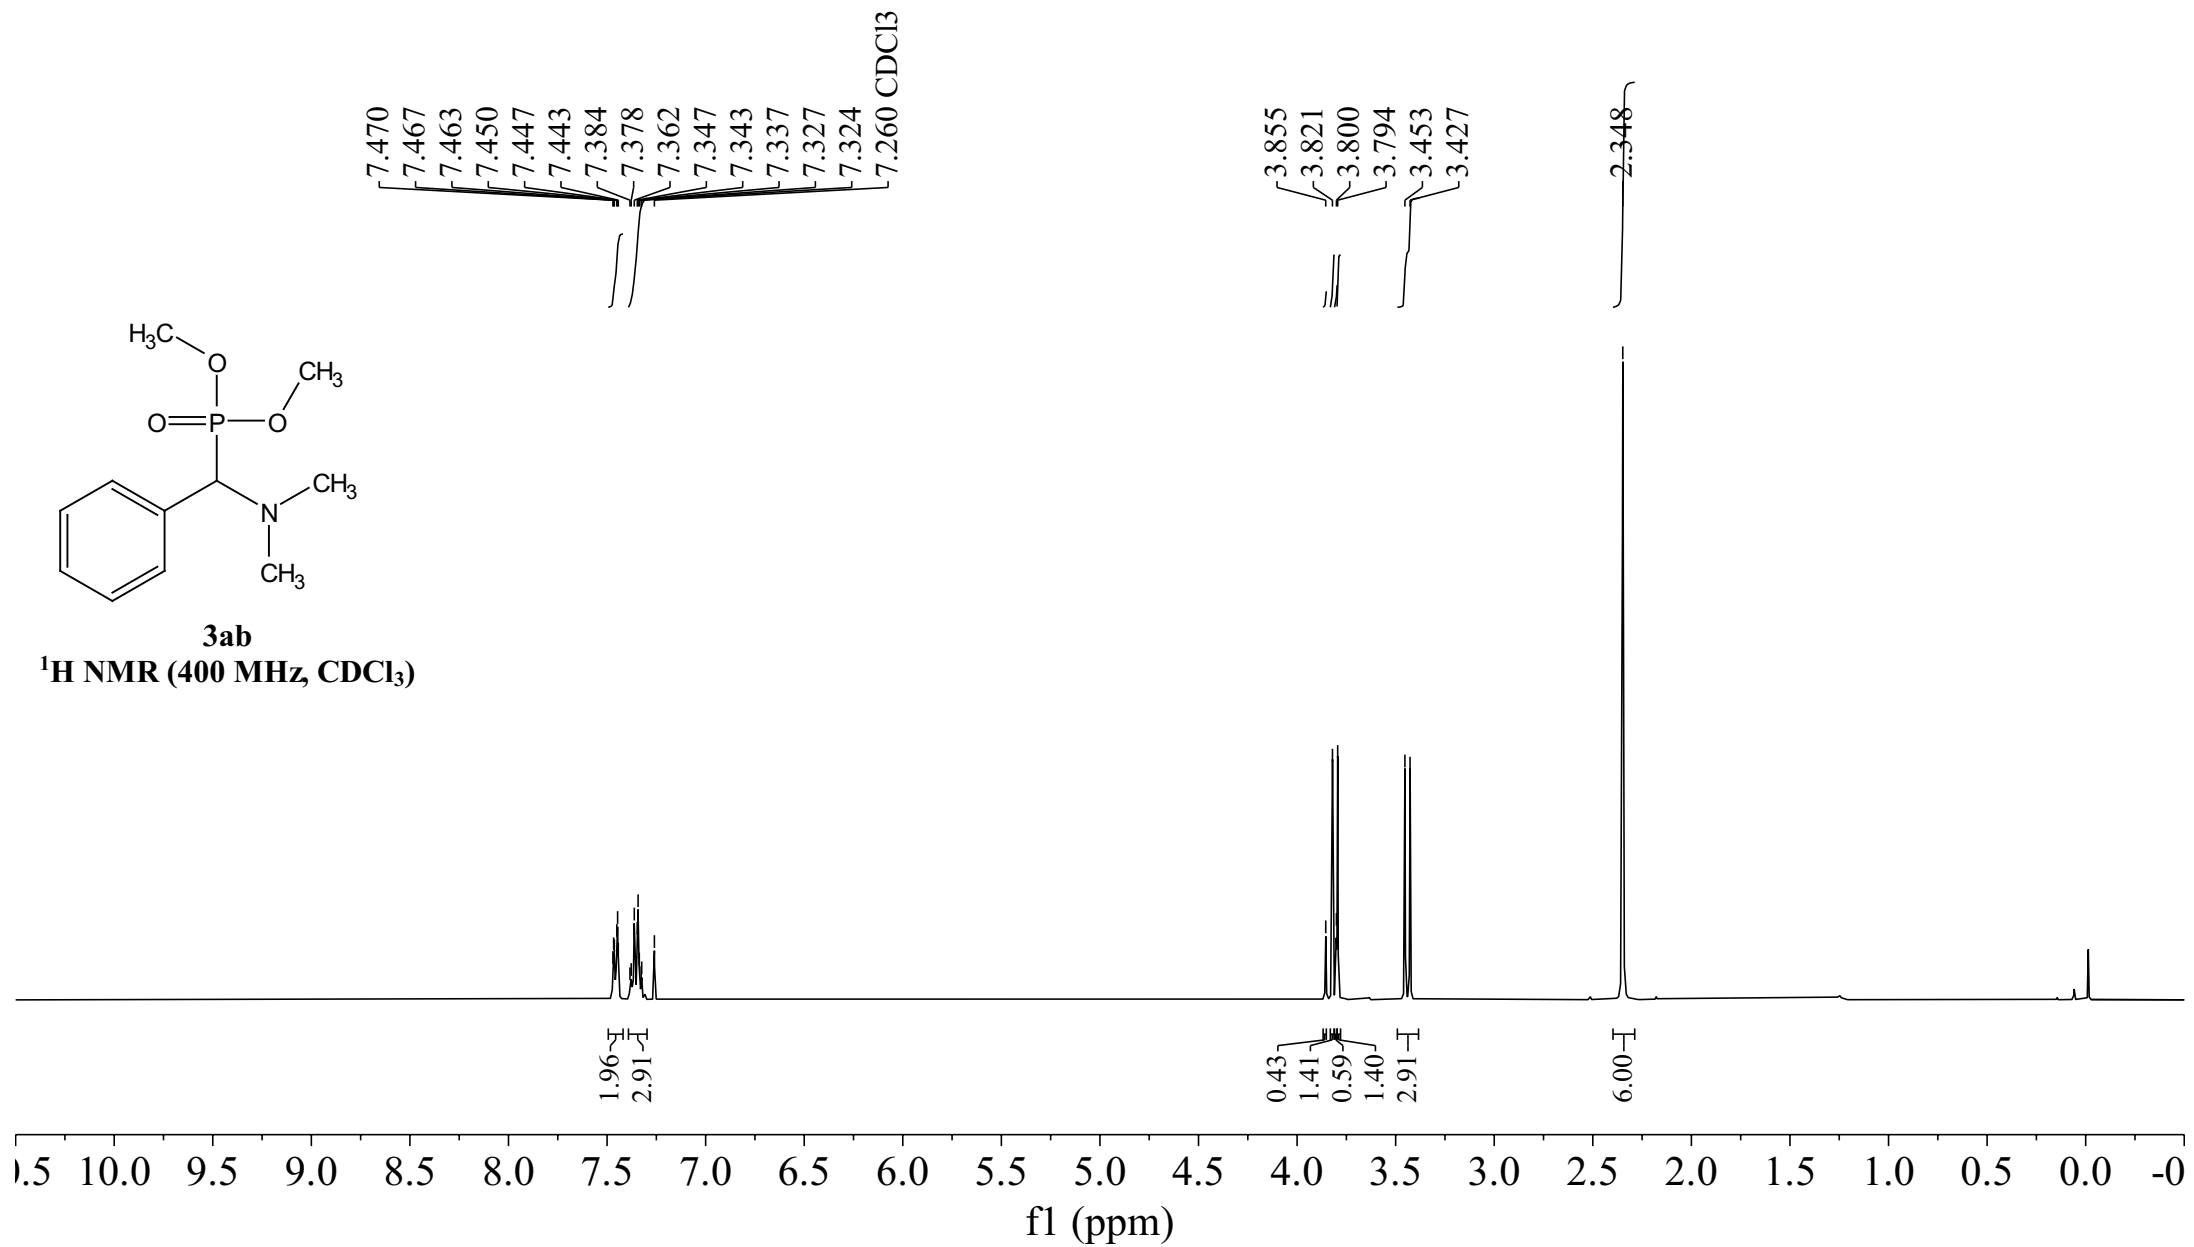

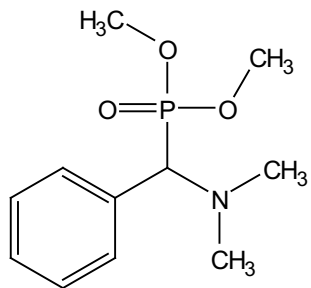

**3ab**

$^{13}\text{C}$  NMR (100 MHz,  $\text{CDCl}_3$ )

132.111  
130.704  
130.618  
128.352  
128.314  
128.298  
  
77.479  
77.160  $\text{CDCl}_3$   
76.843  
68.760  
67.154  
  
53.299  
53.227  
  
43.890  
43.793

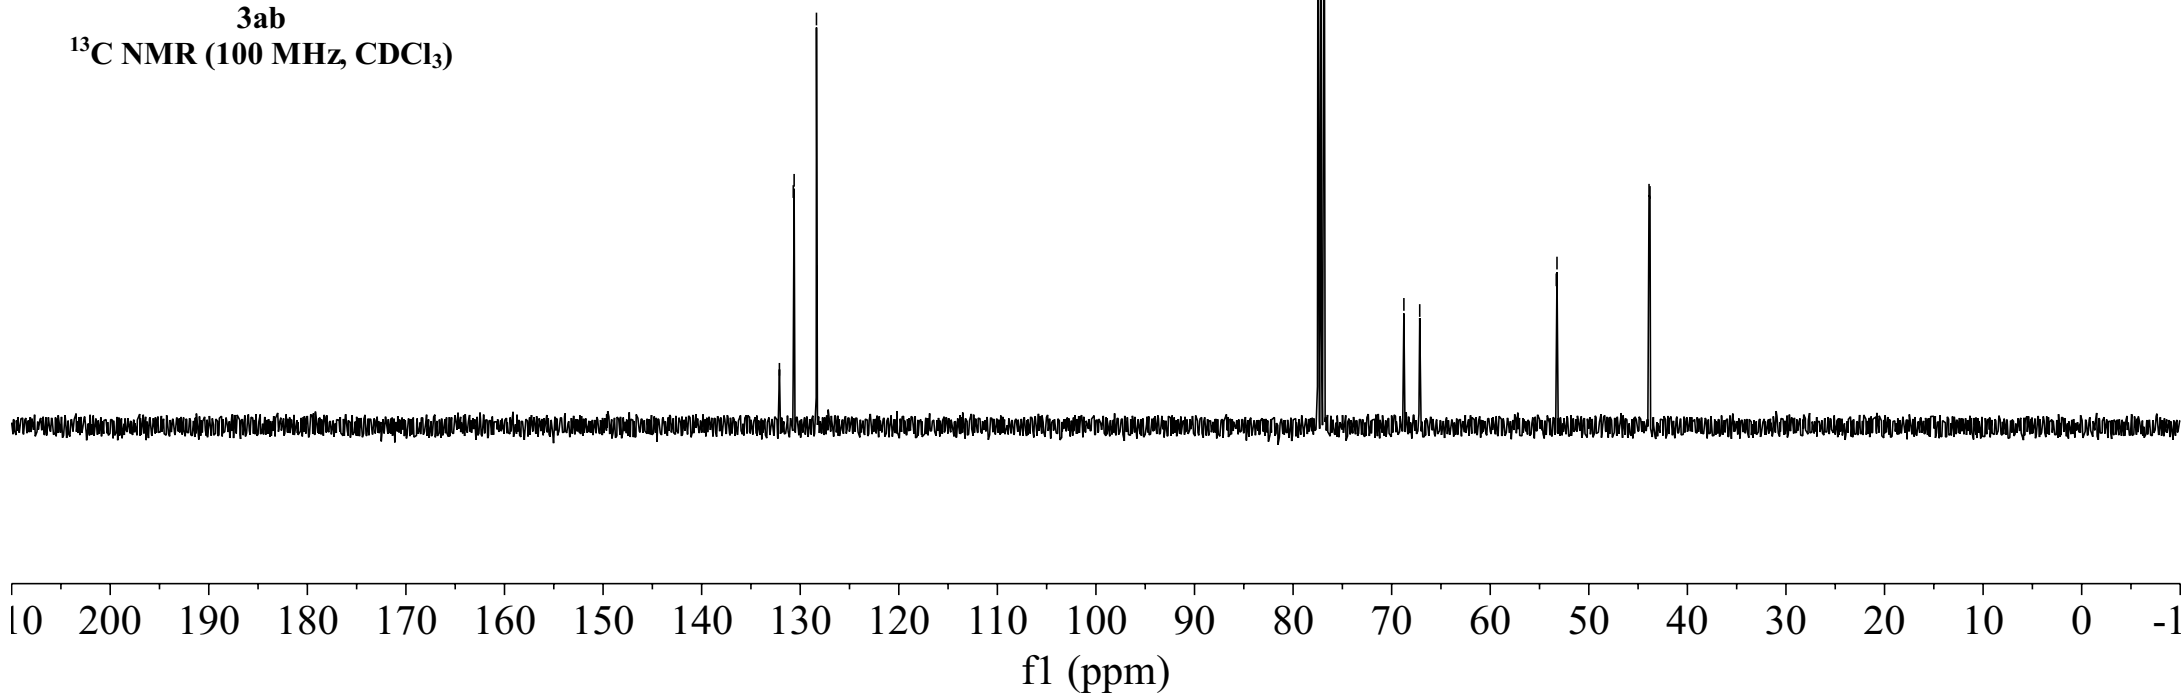

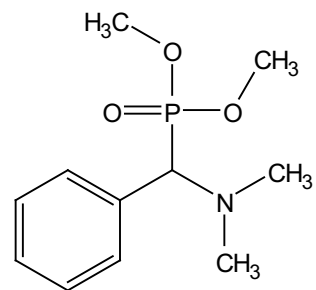

**3ab**

**<sup>31</sup>P NMR (162 MHz, CDCl<sub>3</sub>)**

-24.984



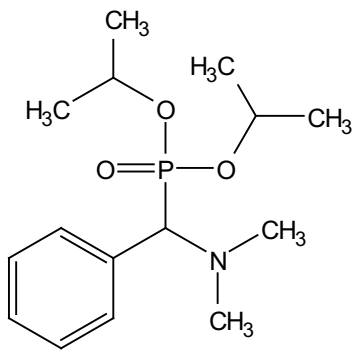

**3ac**

**<sup>1</sup>H NMR (400 MHz, CDCl<sub>3</sub>)**

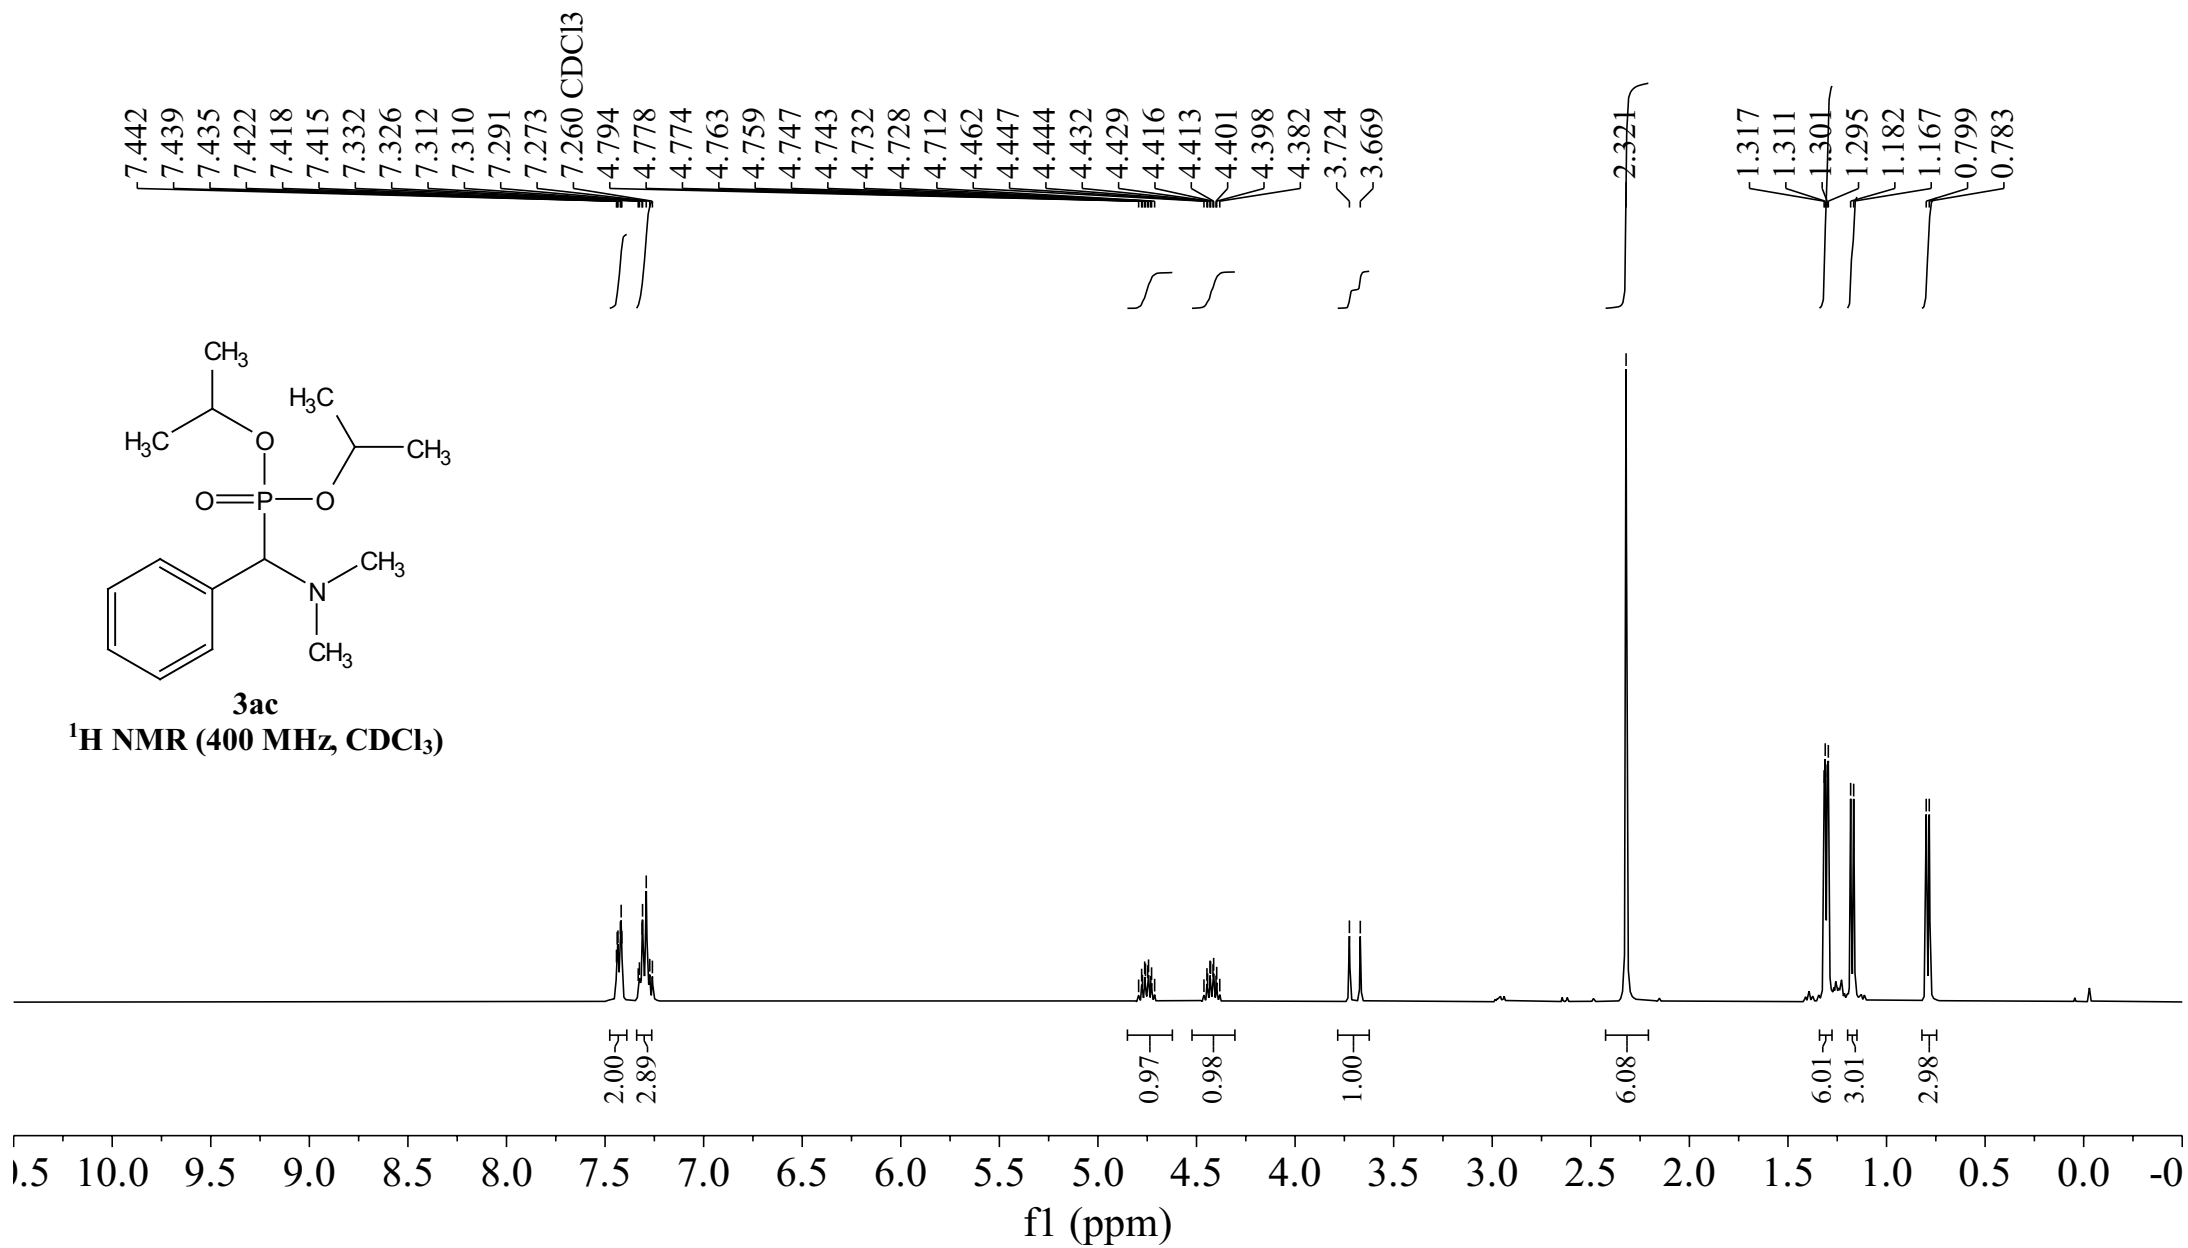

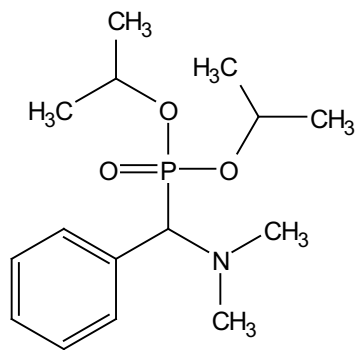

**3ac**

<sup>13</sup>C NMR (100 MHz, CDCl<sub>3</sub>)

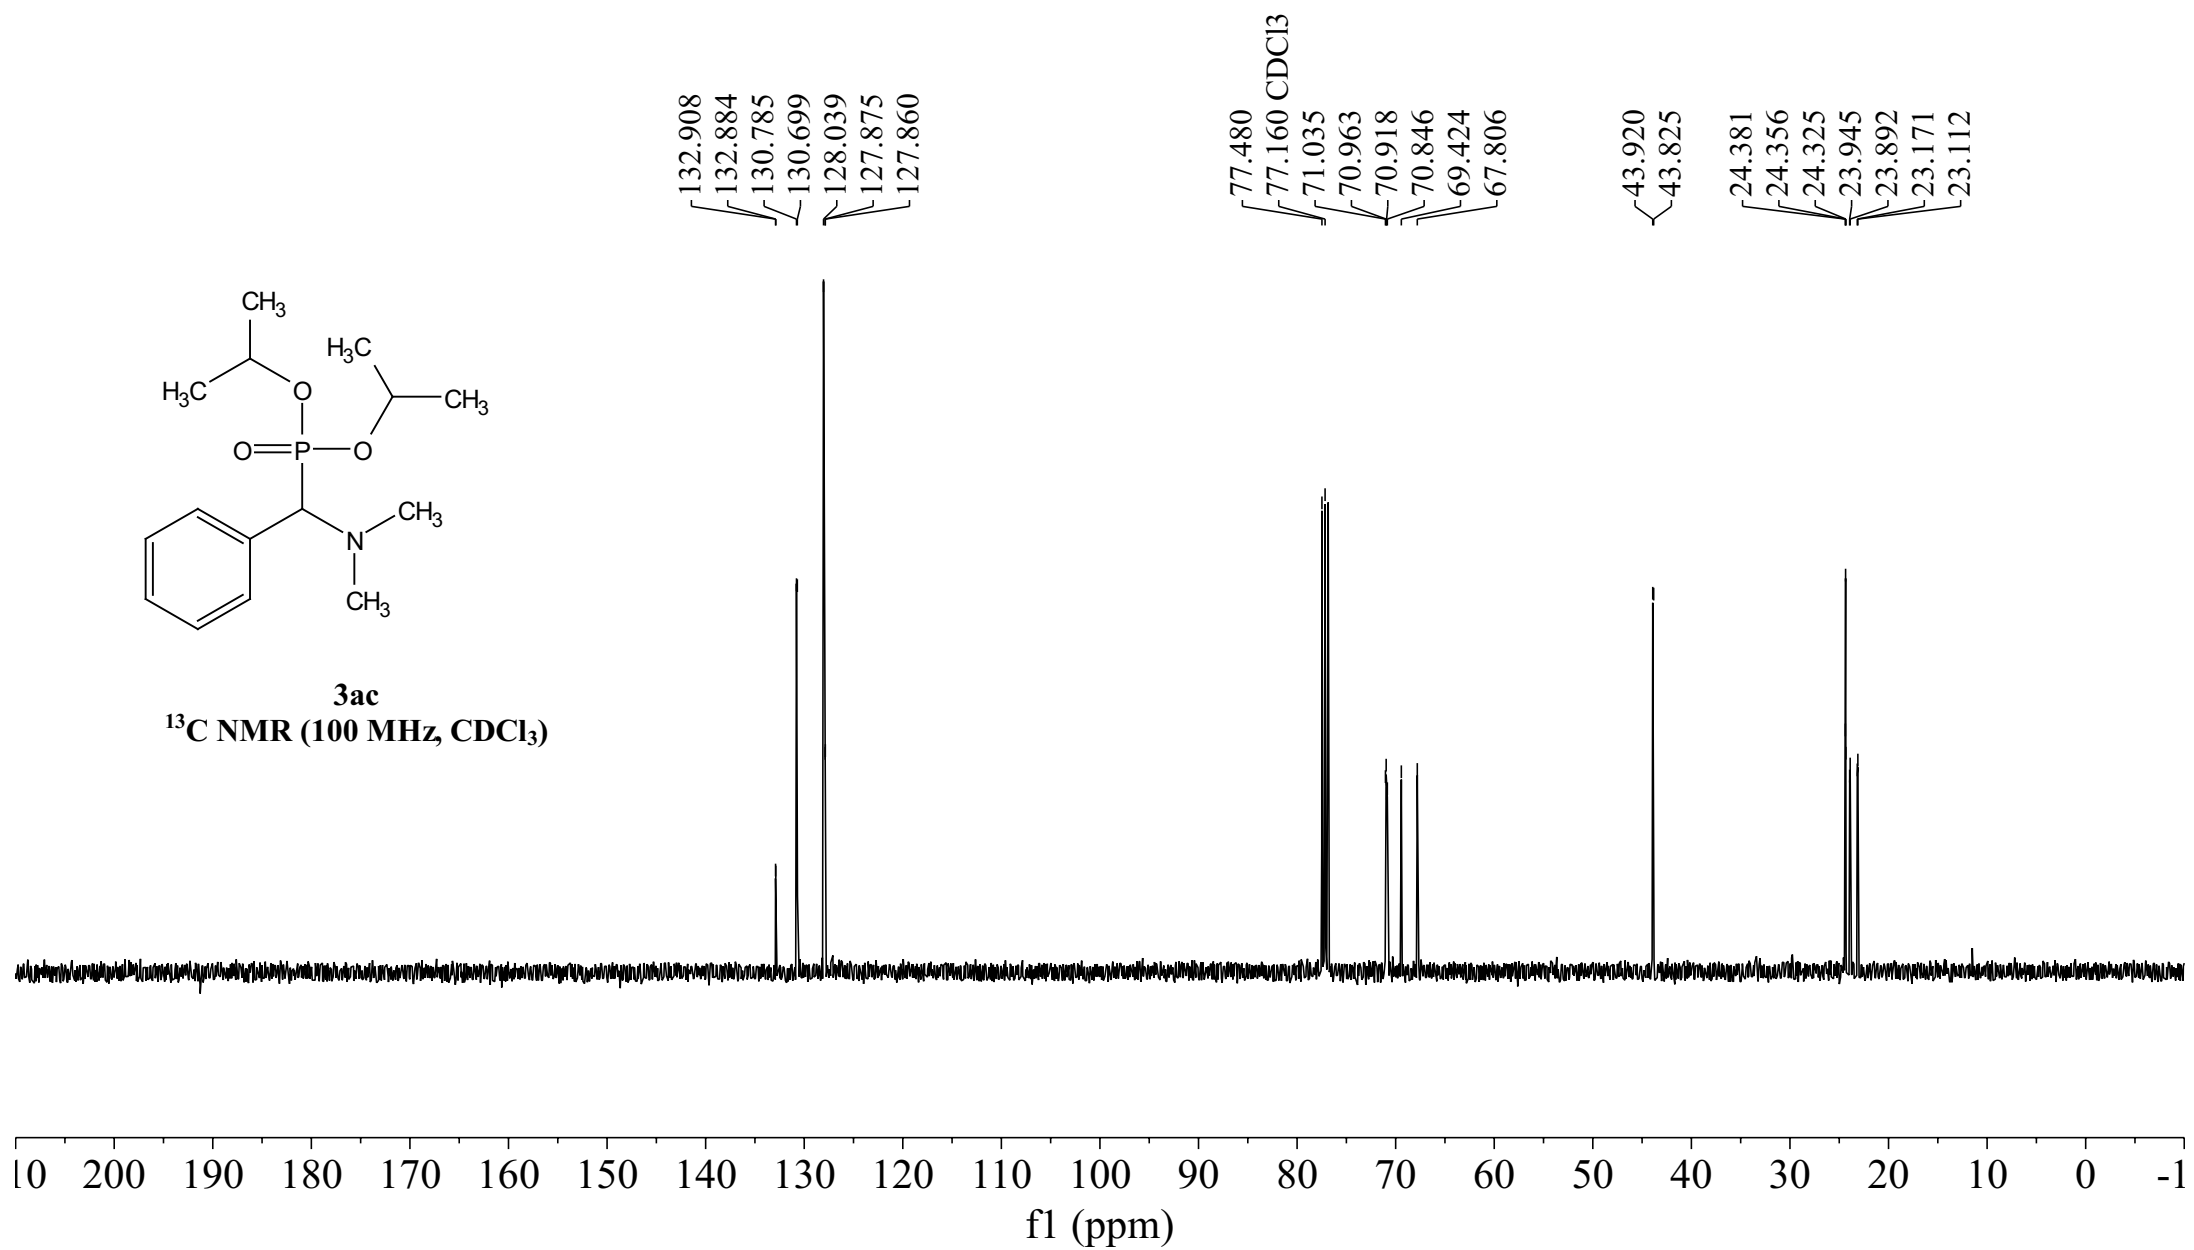

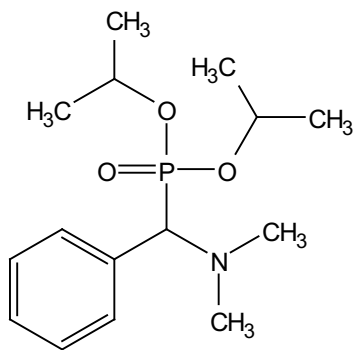

**3ac**  
<sup>31</sup>P NMR (162 MHz, CDCl<sub>3</sub>)

—21.246

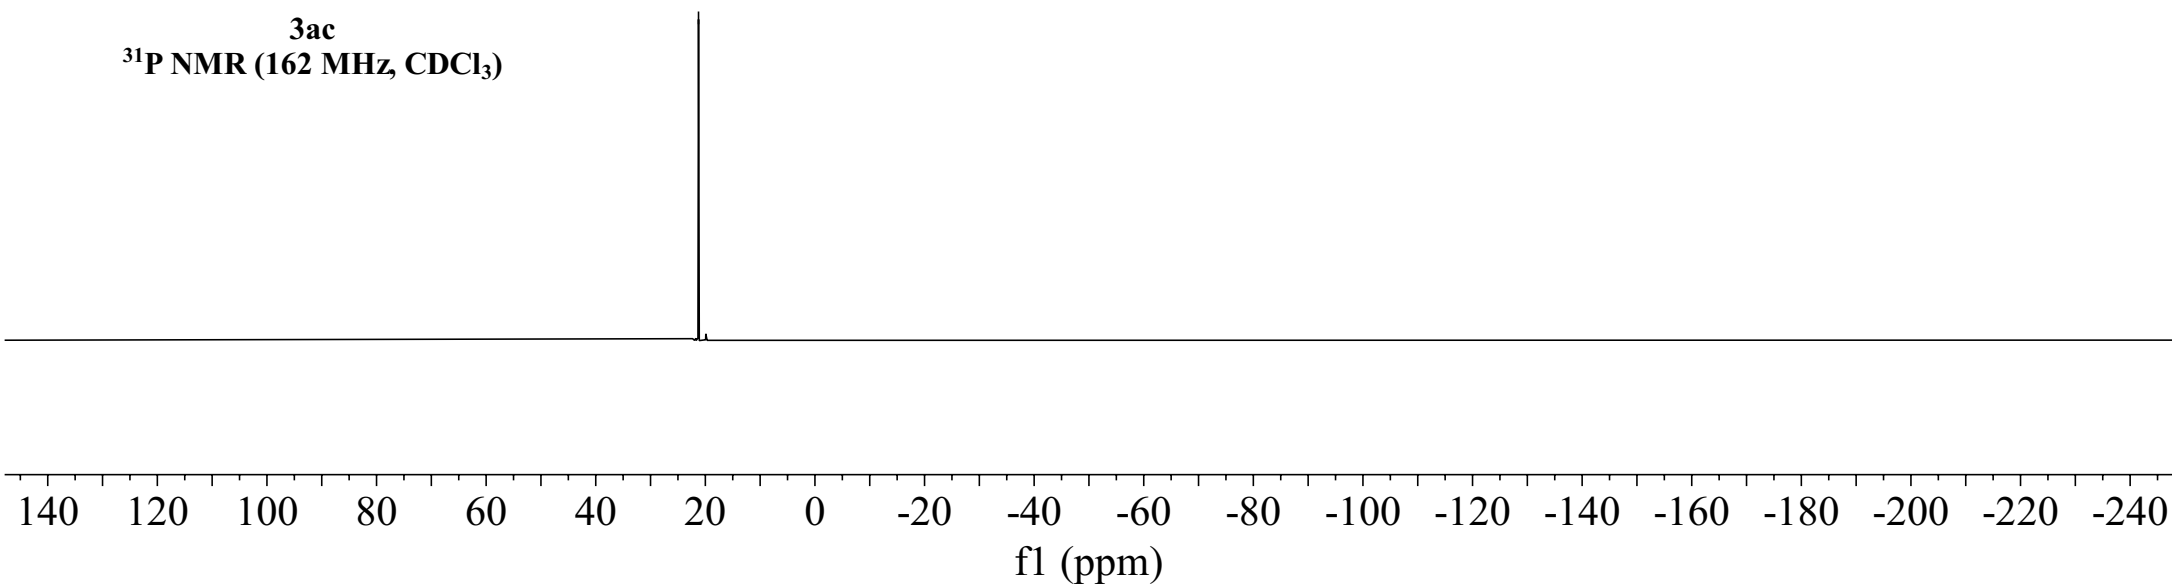

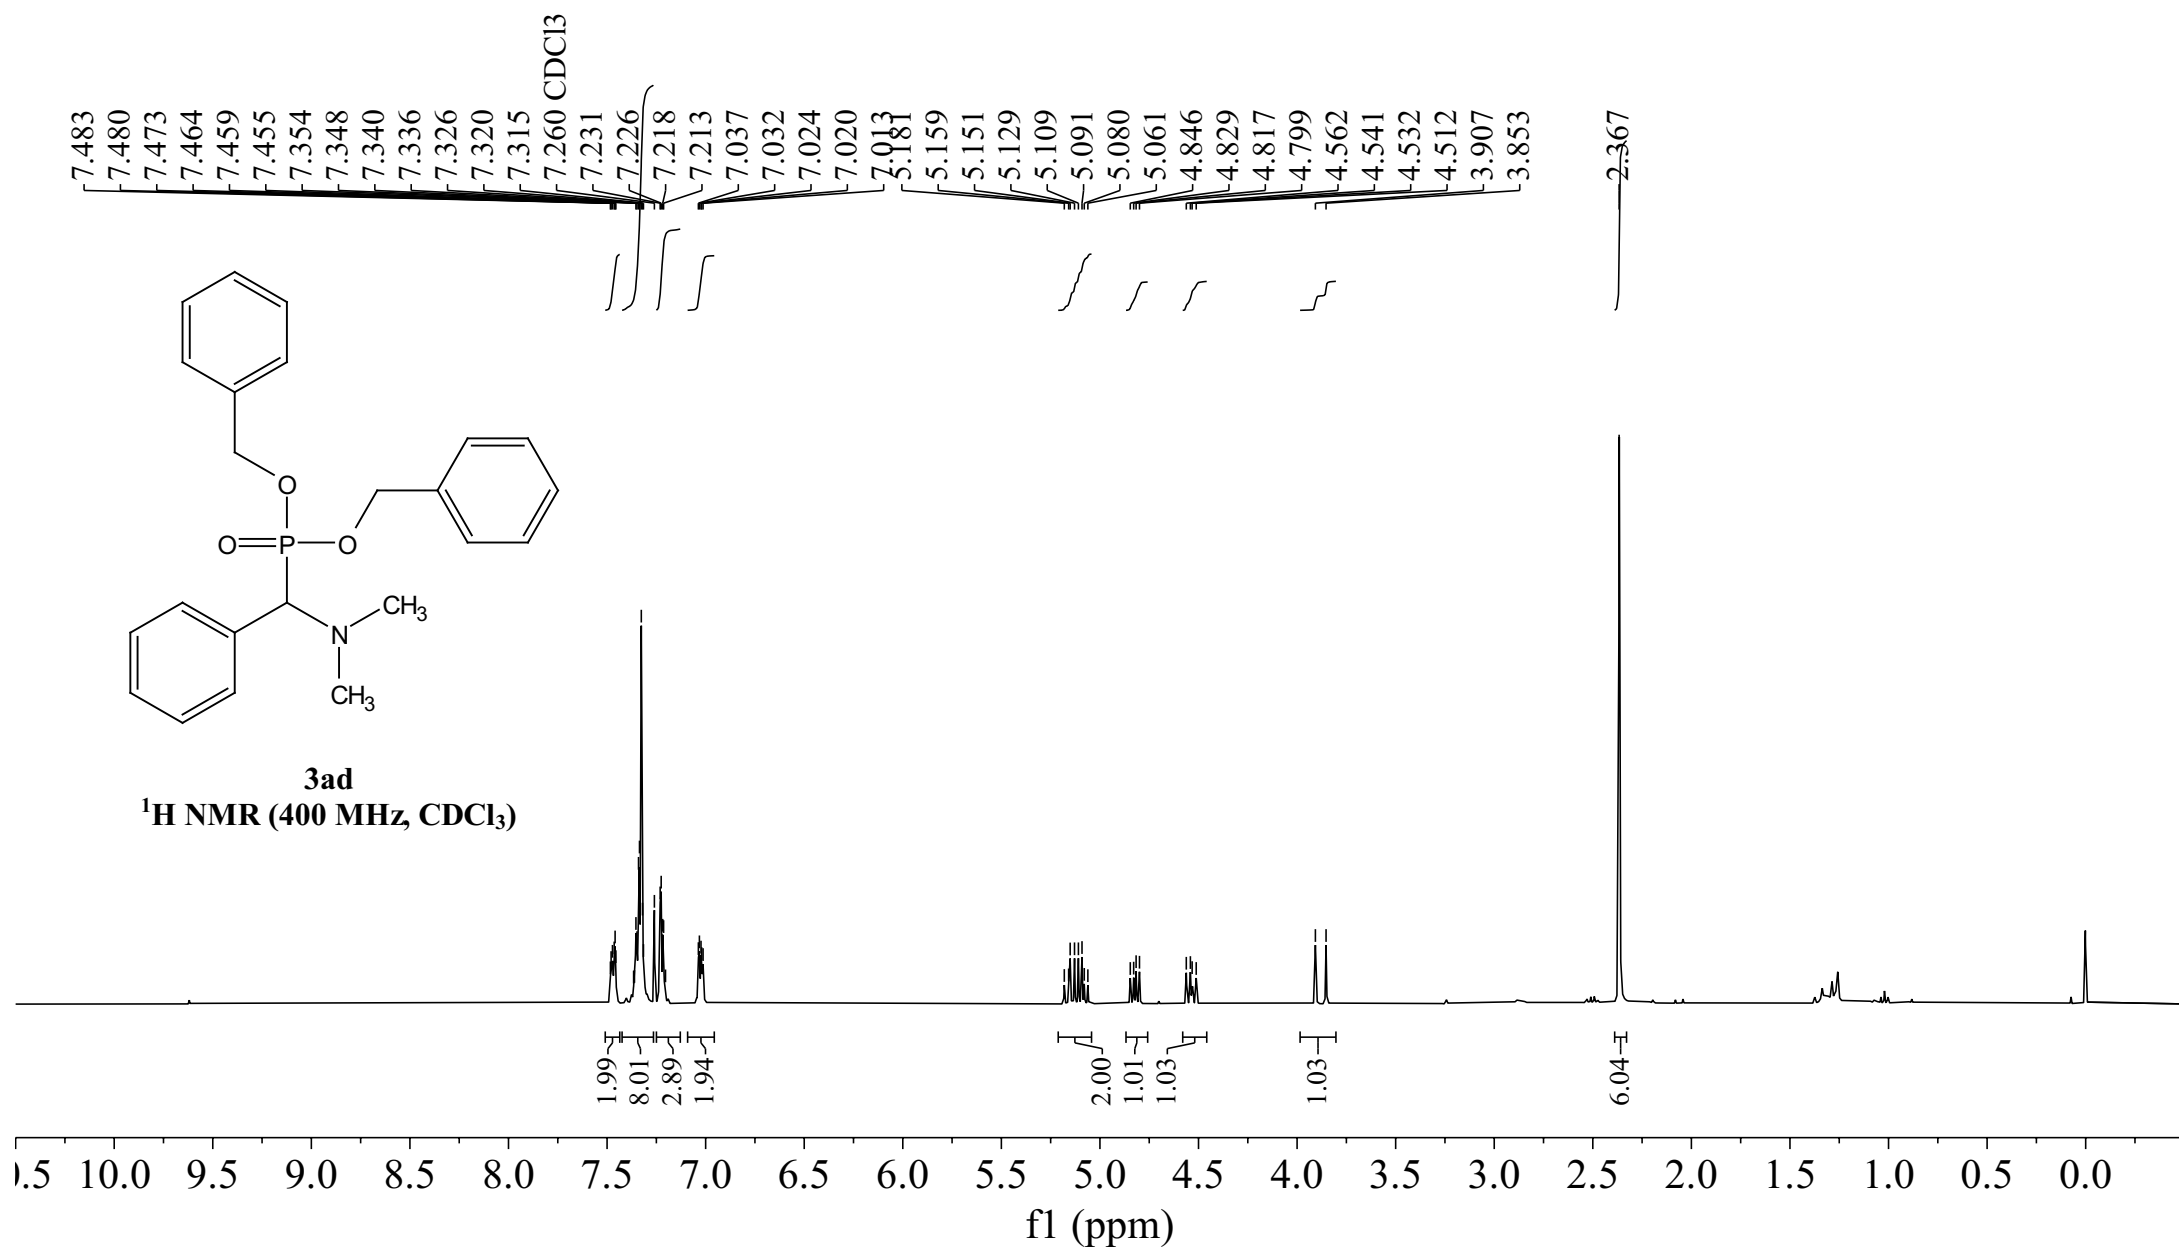



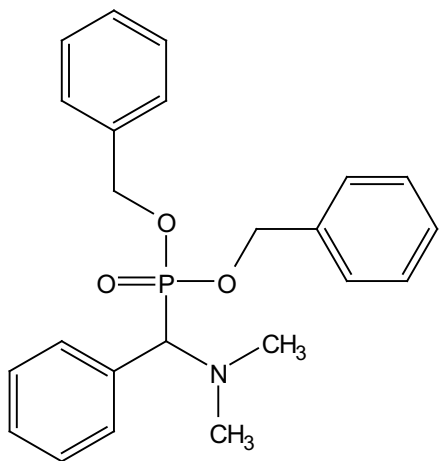

**3ad**  
**<sup>13</sup>C NMR (100 MHz, CDCl<sub>3</sub>)**

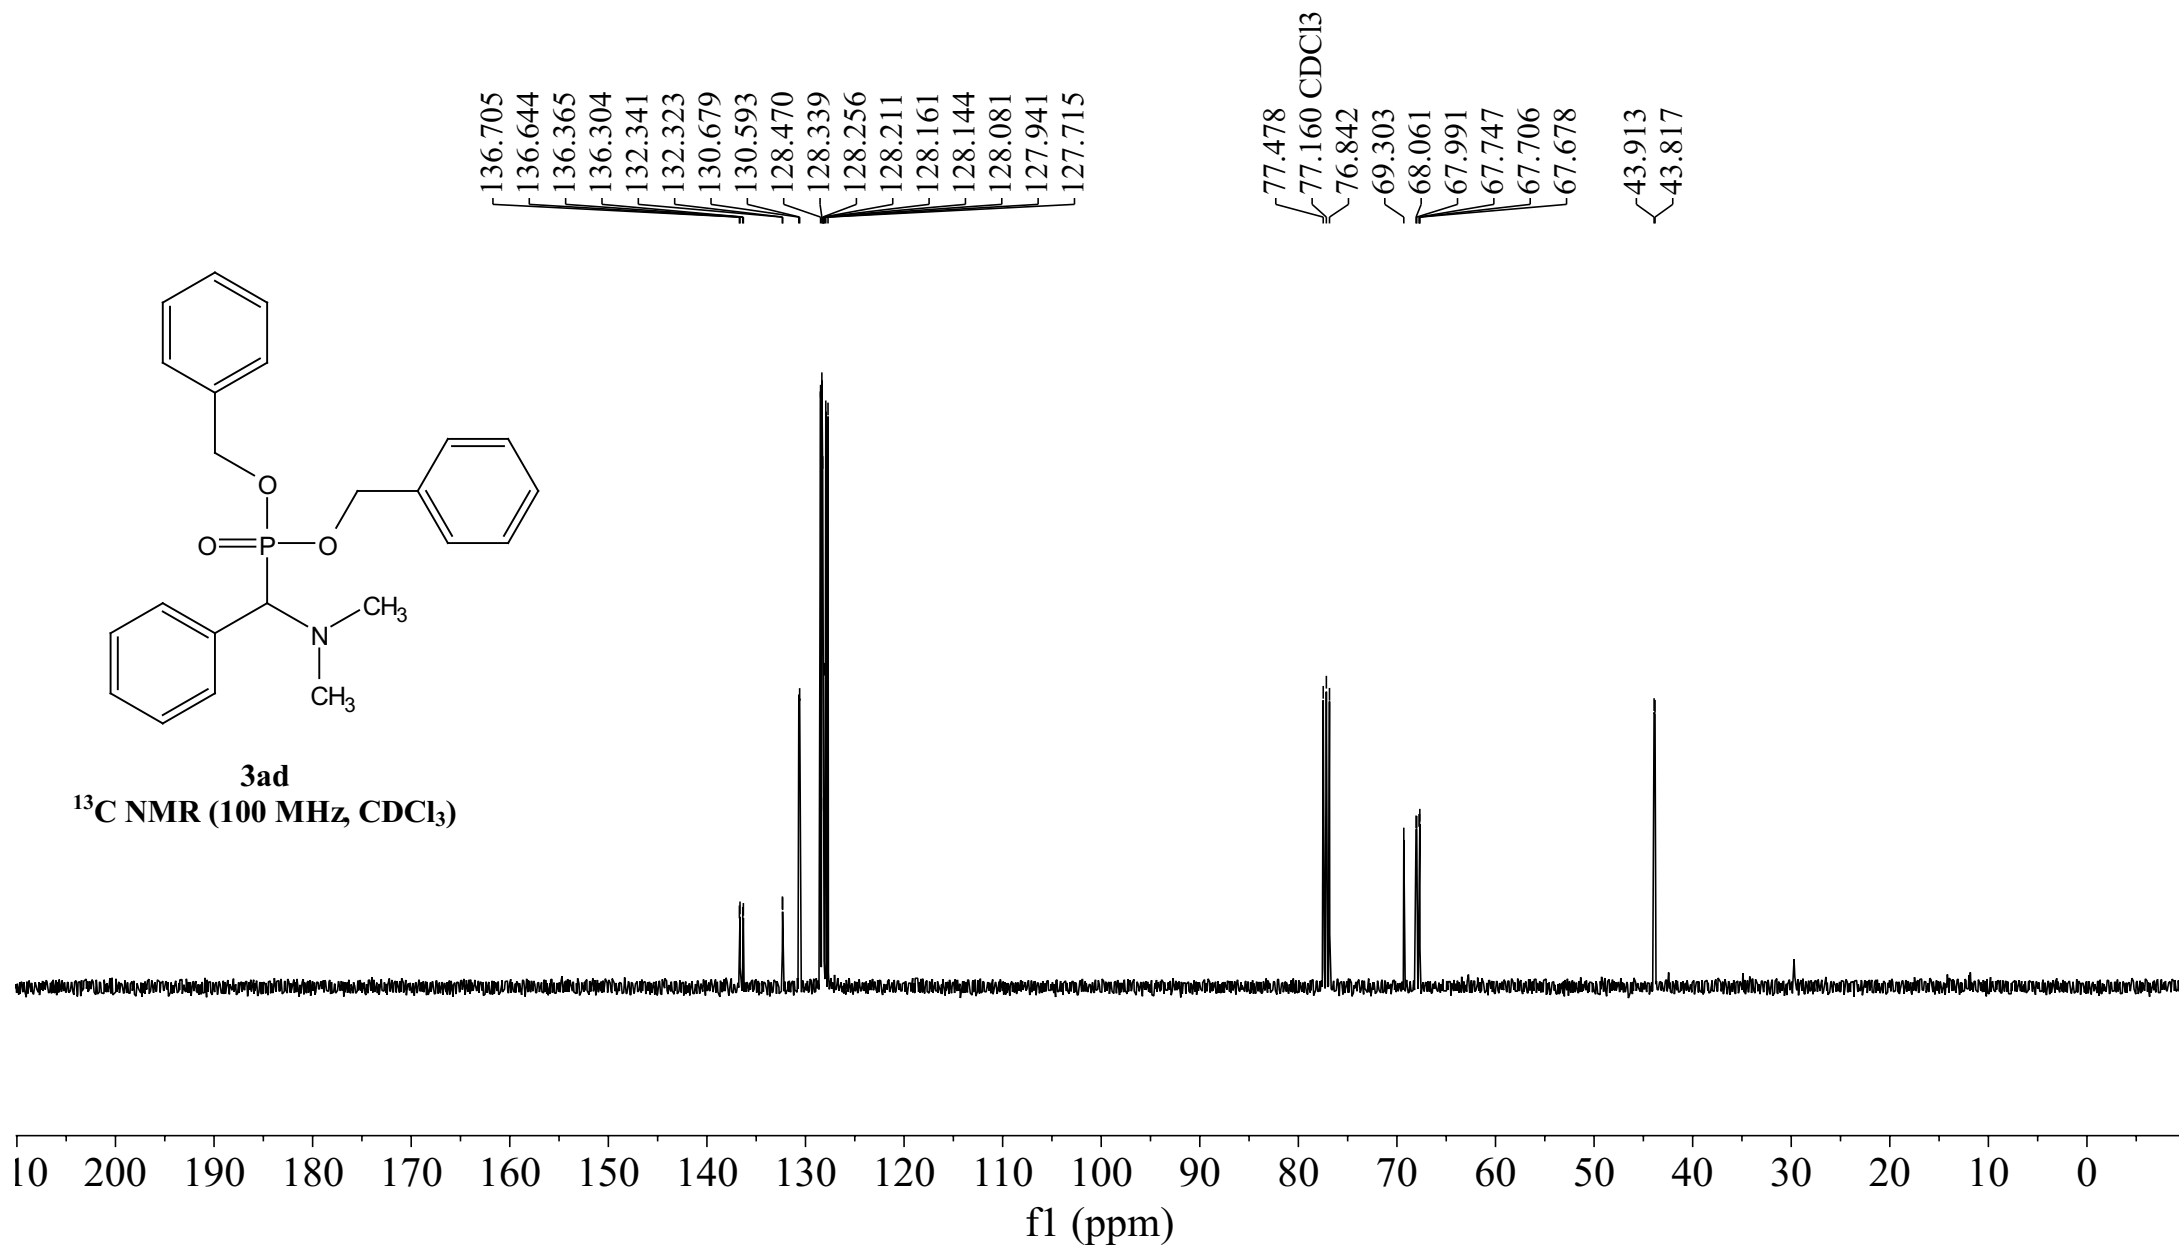

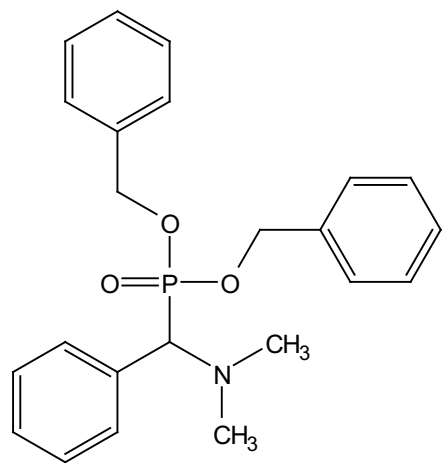

**3ad**

**<sup>31</sup>P NMR (162 MHz, CDCl<sub>3</sub>)**

—23.559

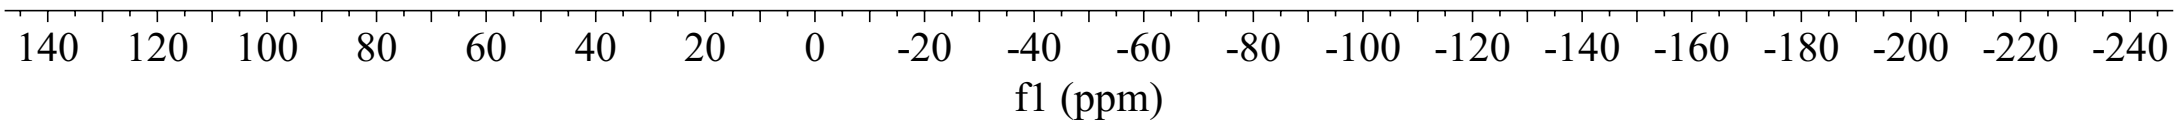

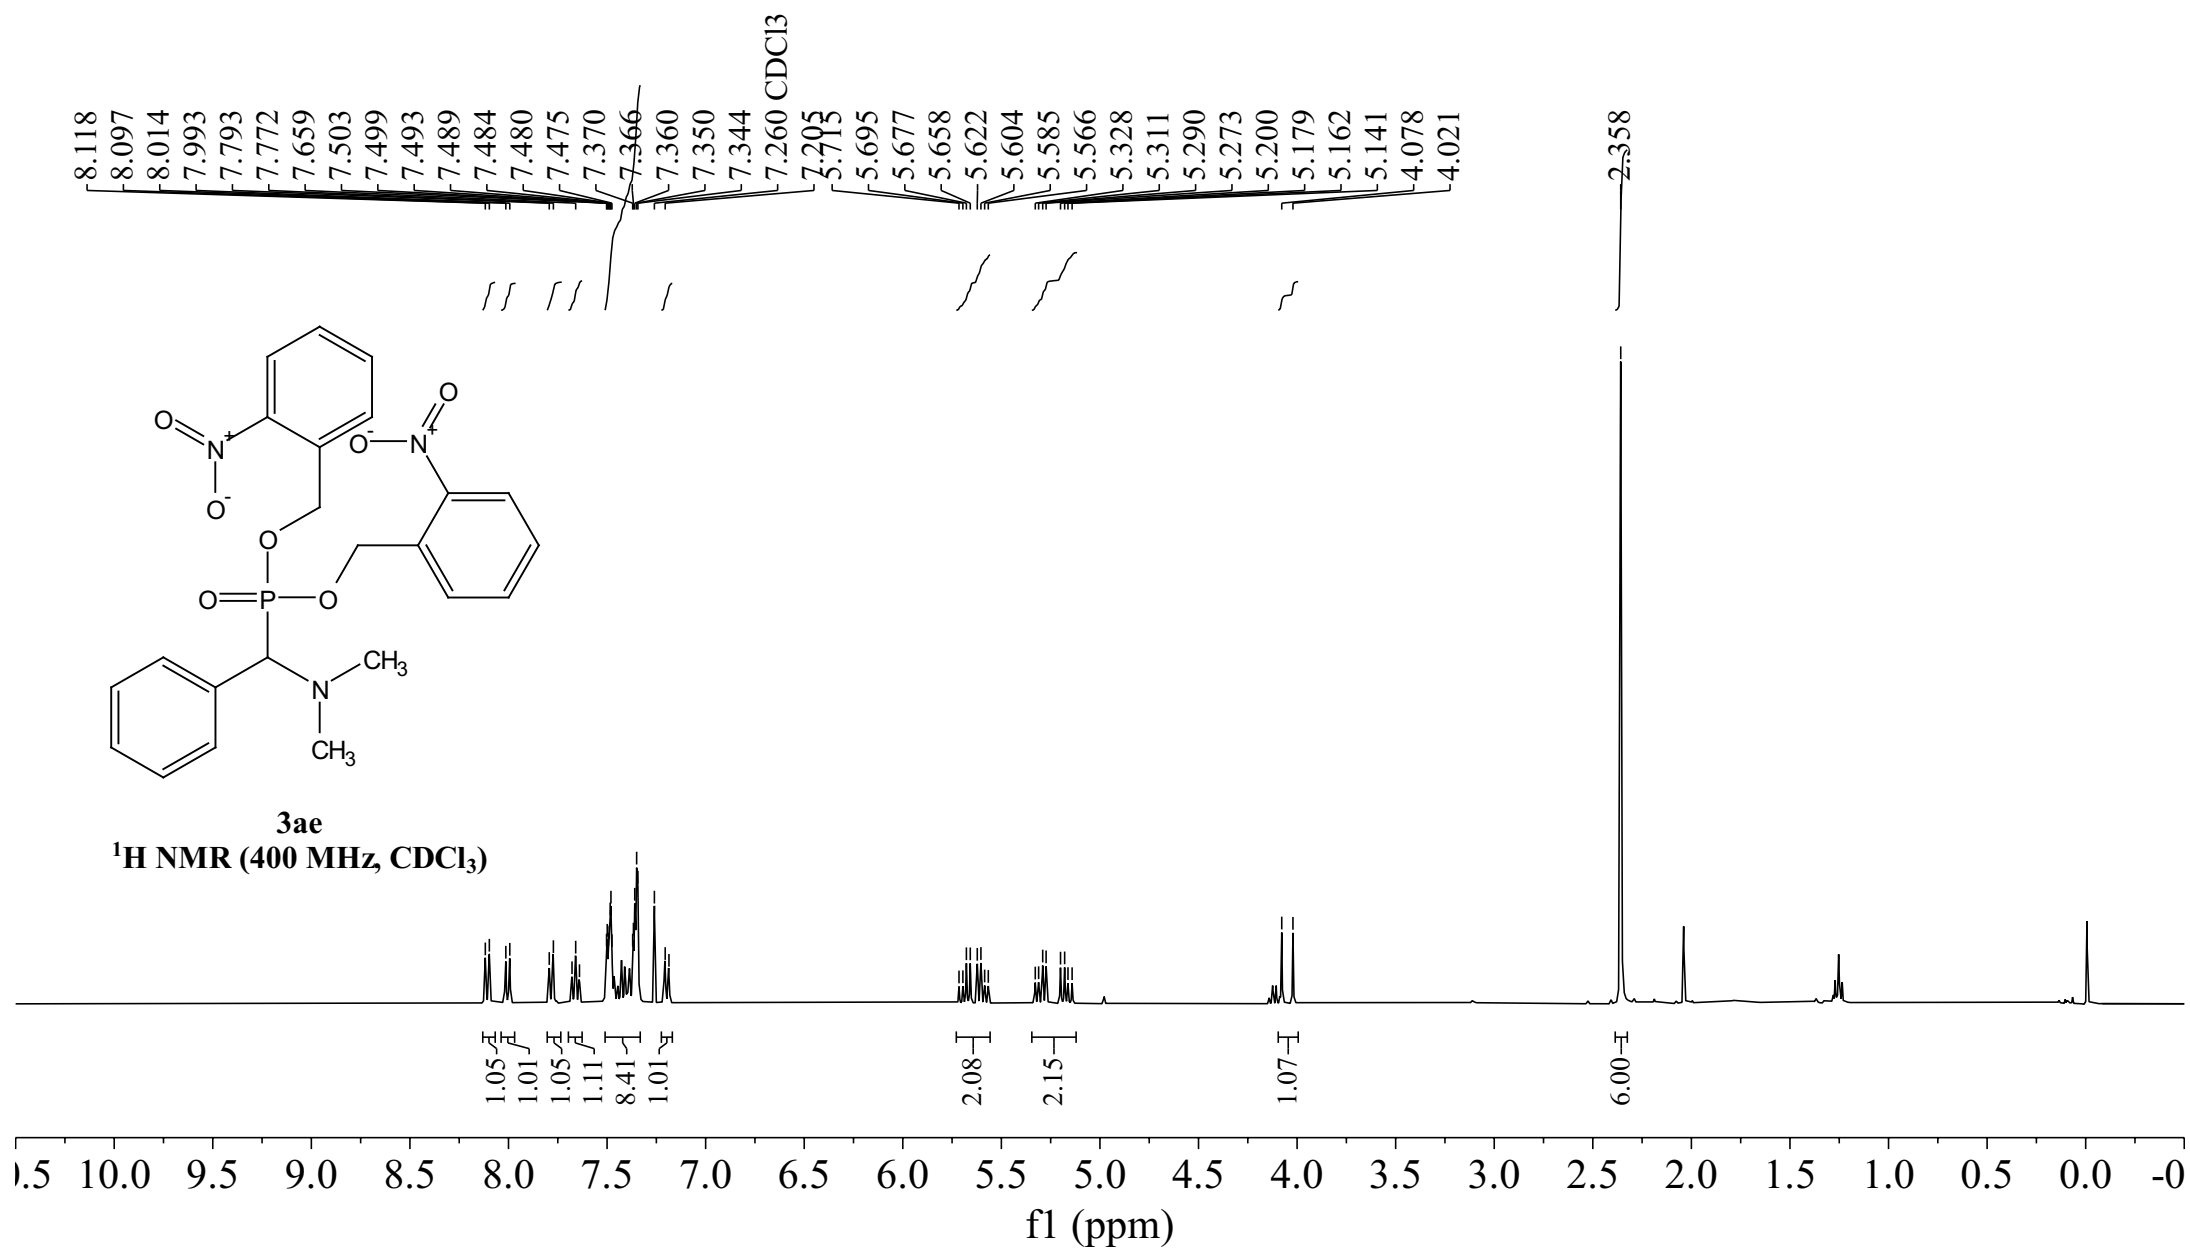

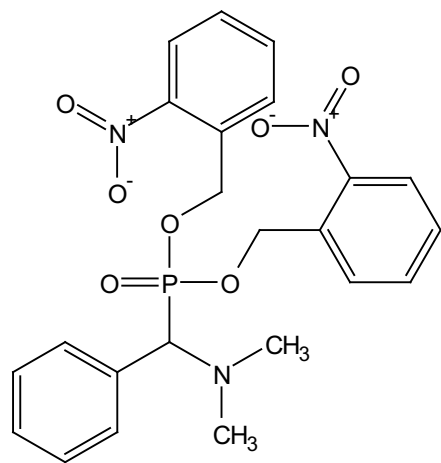

**3ae**

<sup>13</sup>C NMR (100 MHz, CDCl<sub>3</sub>)

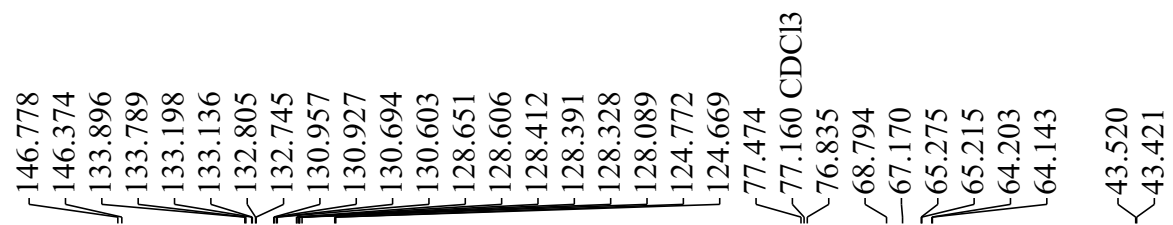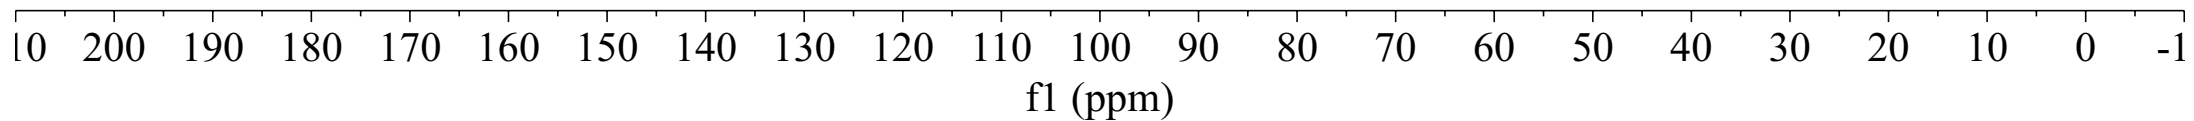

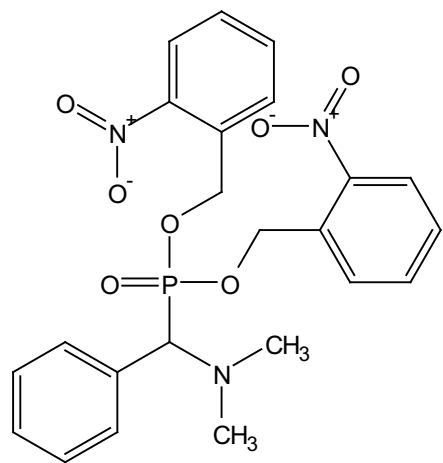

**3ae**  
**<sup>31</sup>P NMR (162 MHz, CDCl<sub>3</sub>)**

—23.492



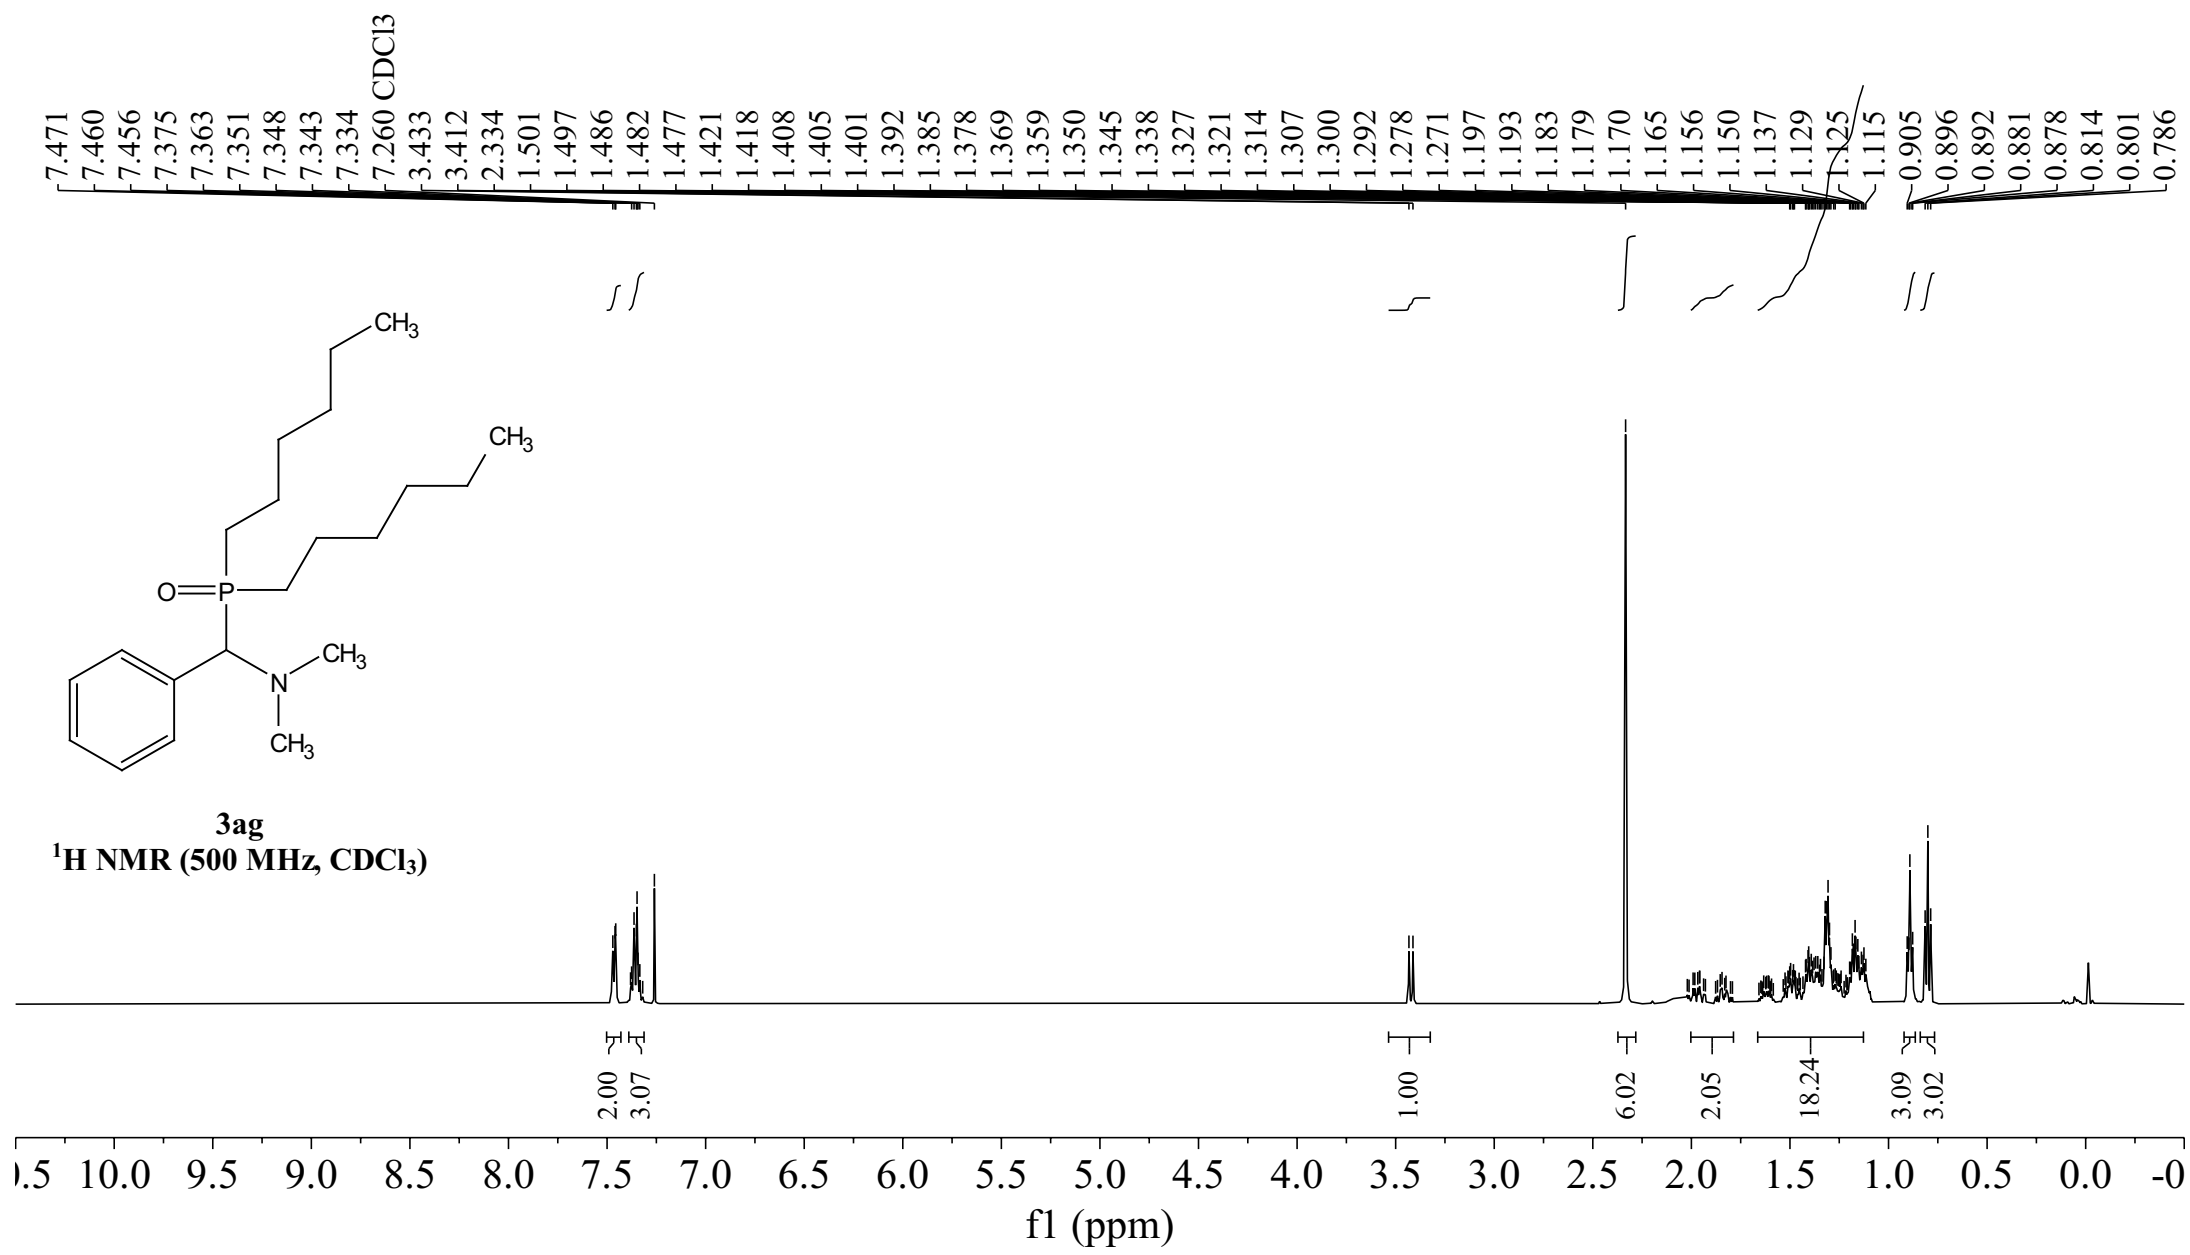

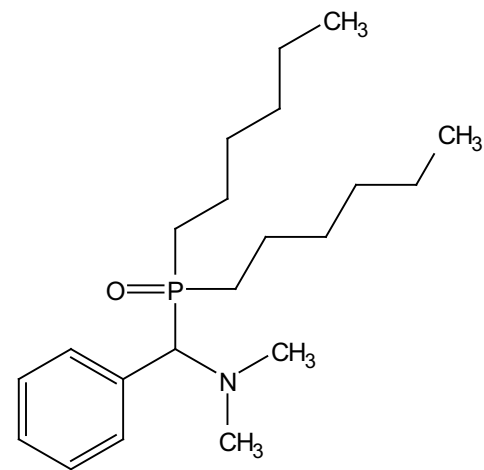

**3ag**  
<sup>13</sup>C NMR (100 MHz, CDCl<sub>3</sub>)

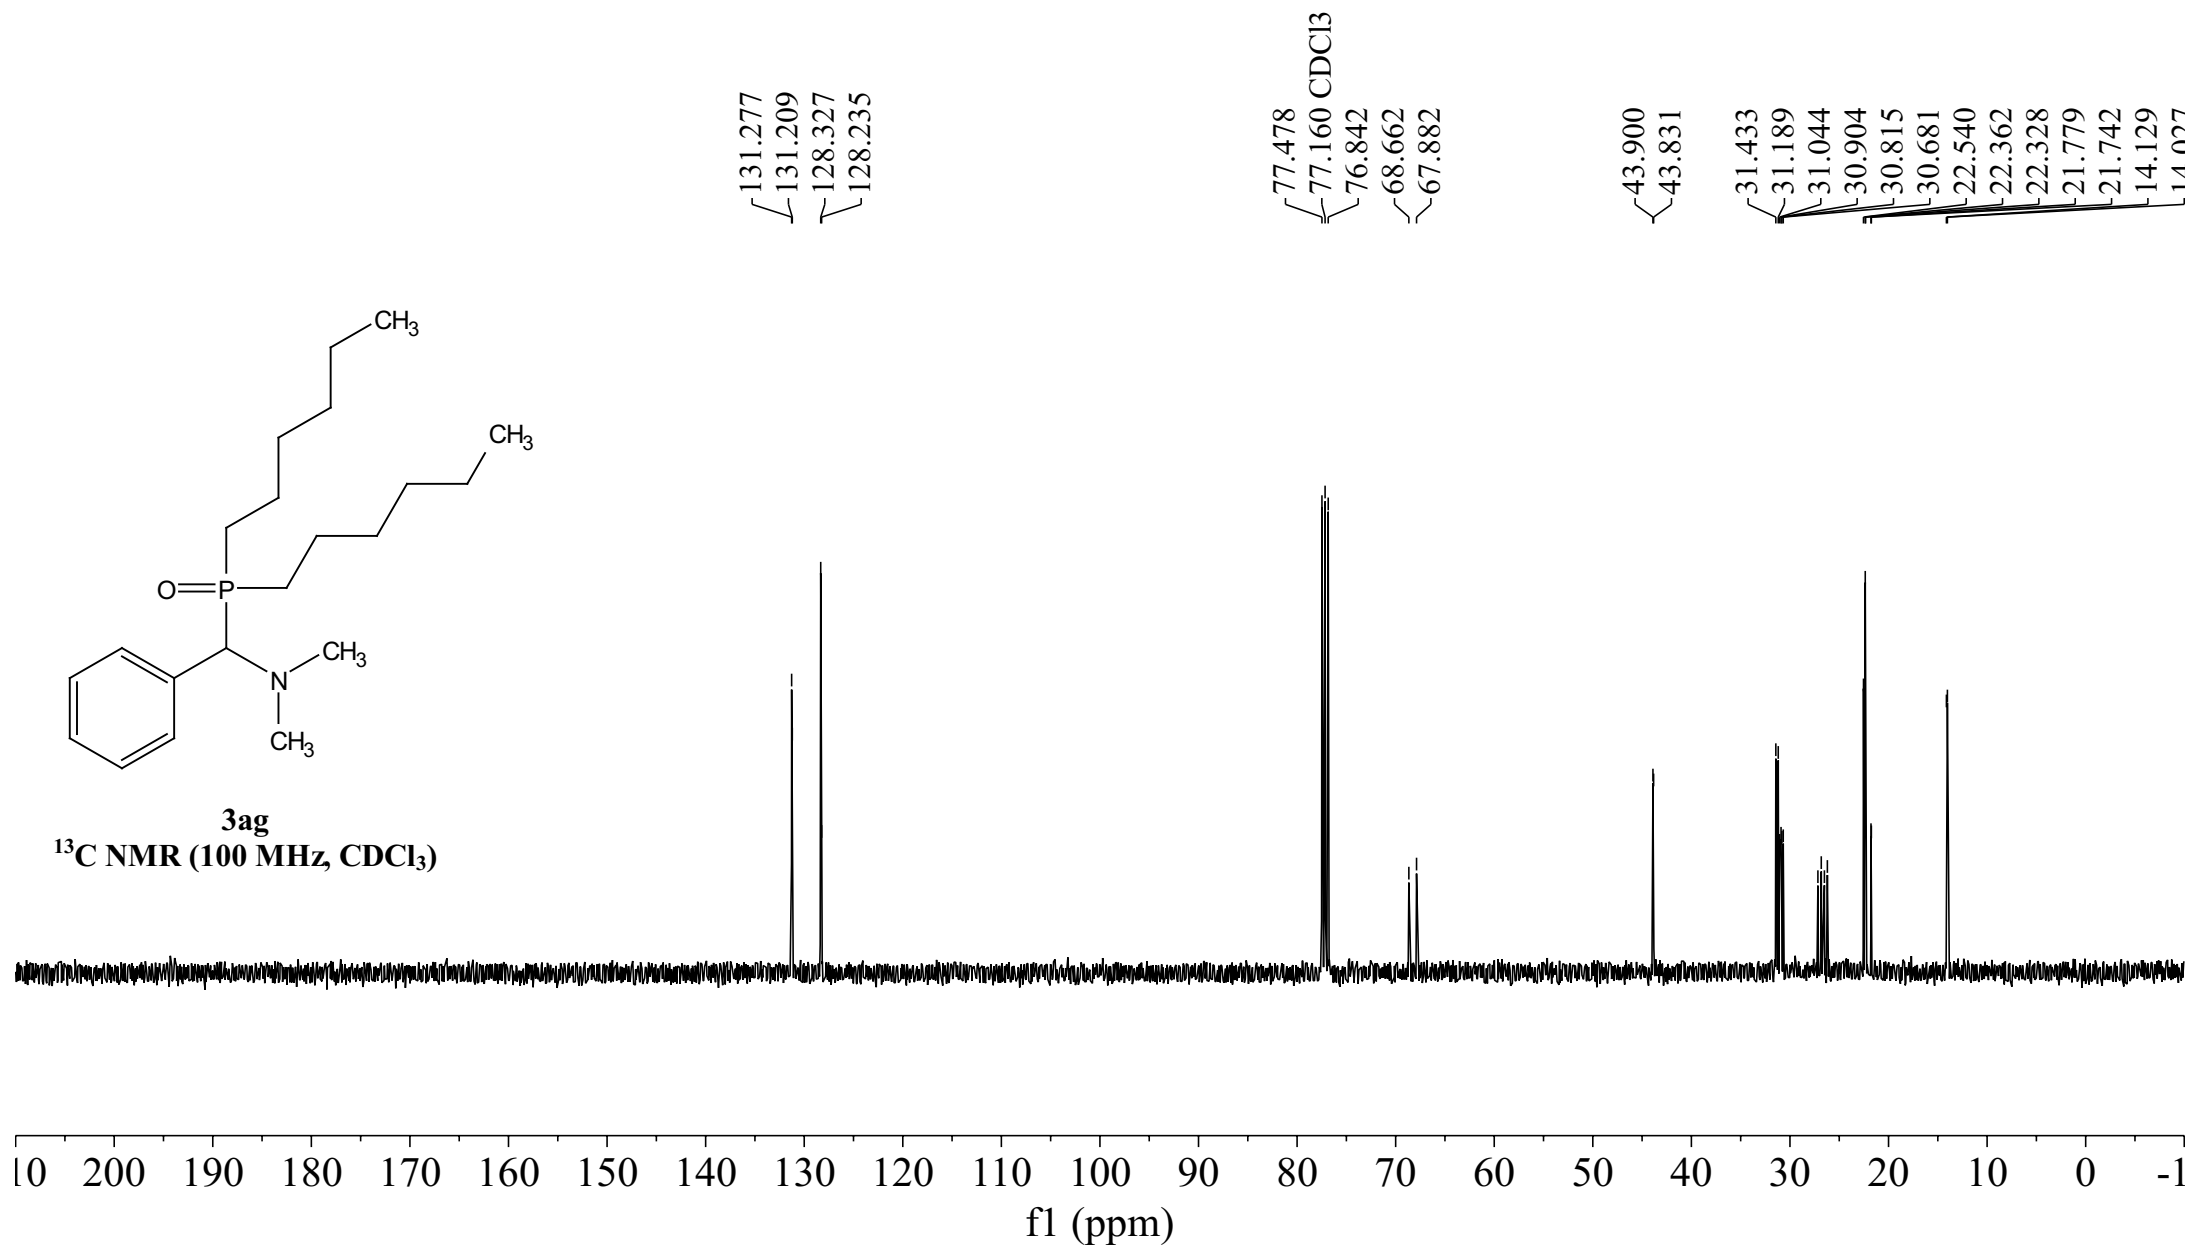

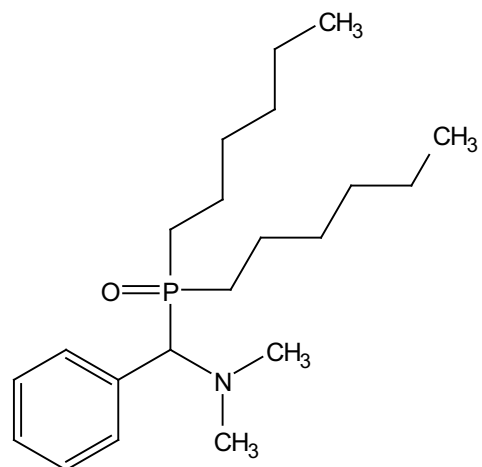

**3ag**

**<sup>31</sup>P NMR (202 MHz, CDCl<sub>3</sub>)**

—50.896

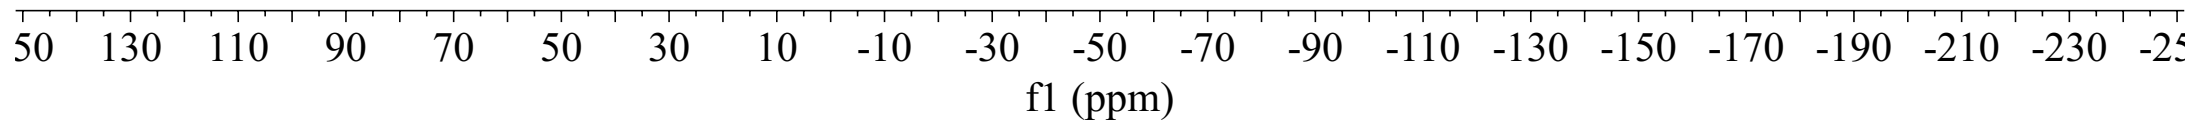



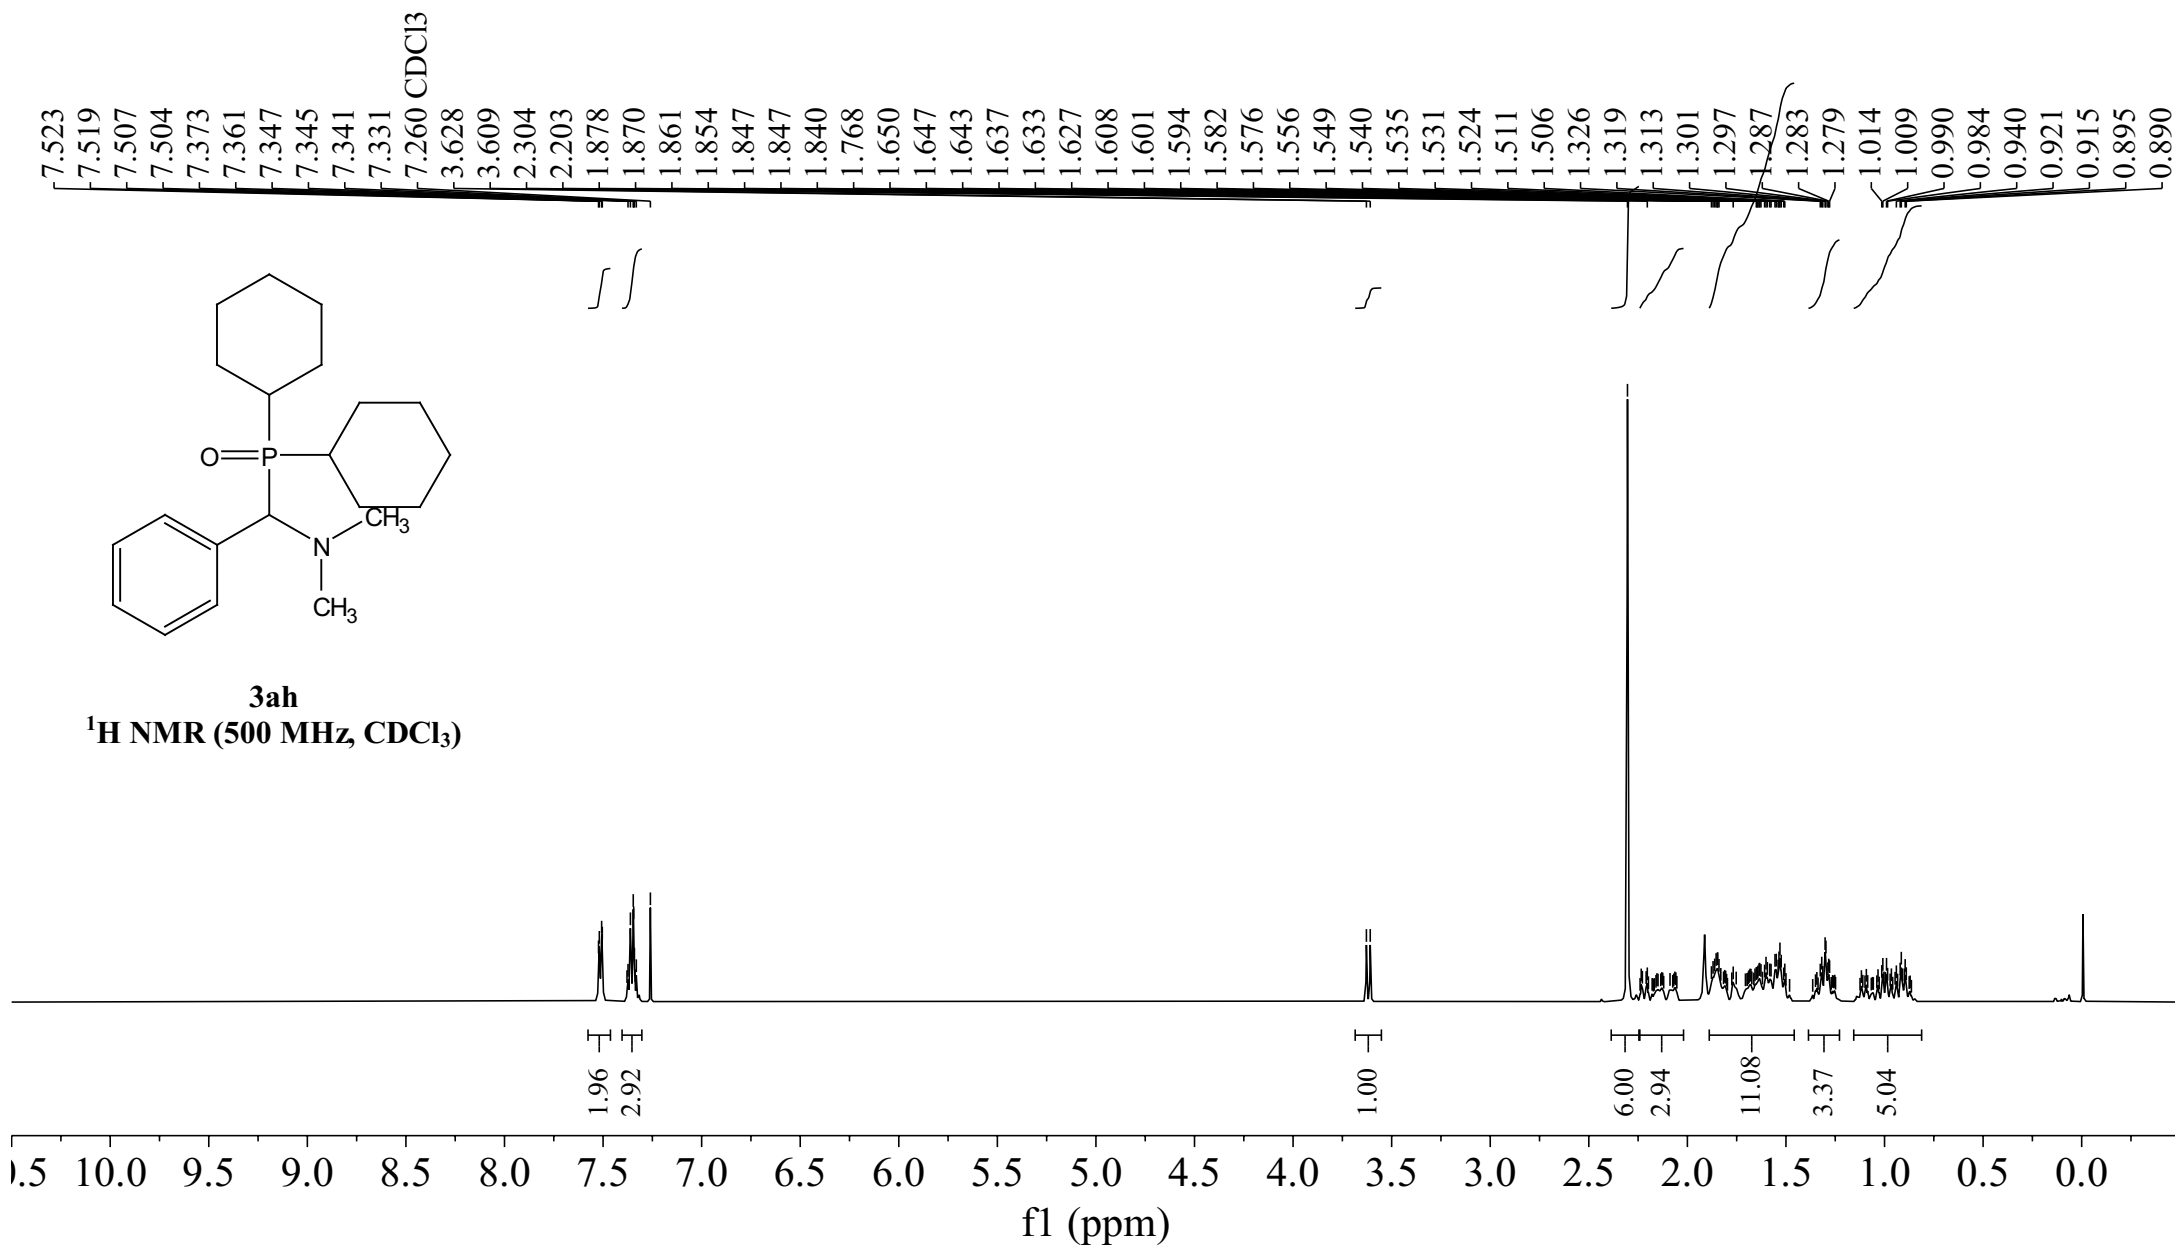

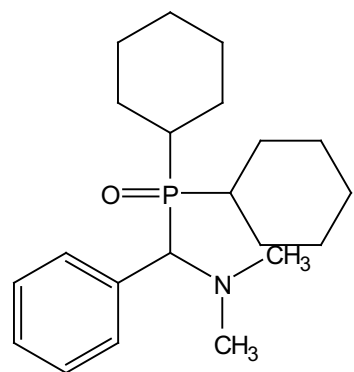

**3ah**

**<sup>13</sup>C NMR (126 MHz, CDCl<sub>3</sub>)**

131.784  
131.731  
130.824  
130.807  
128.017  
127.979

77.414  
77.160 CDCl<sub>3</sub>  
76.906

64.468  
63.873

43.339  
43.283  
38.032  
37.852  
37.561  
37.349

27.112  
26.948  
26.914  
26.892  
26.857  
26.744  
26.722  
26.492  
26.202  
26.179  
26.155

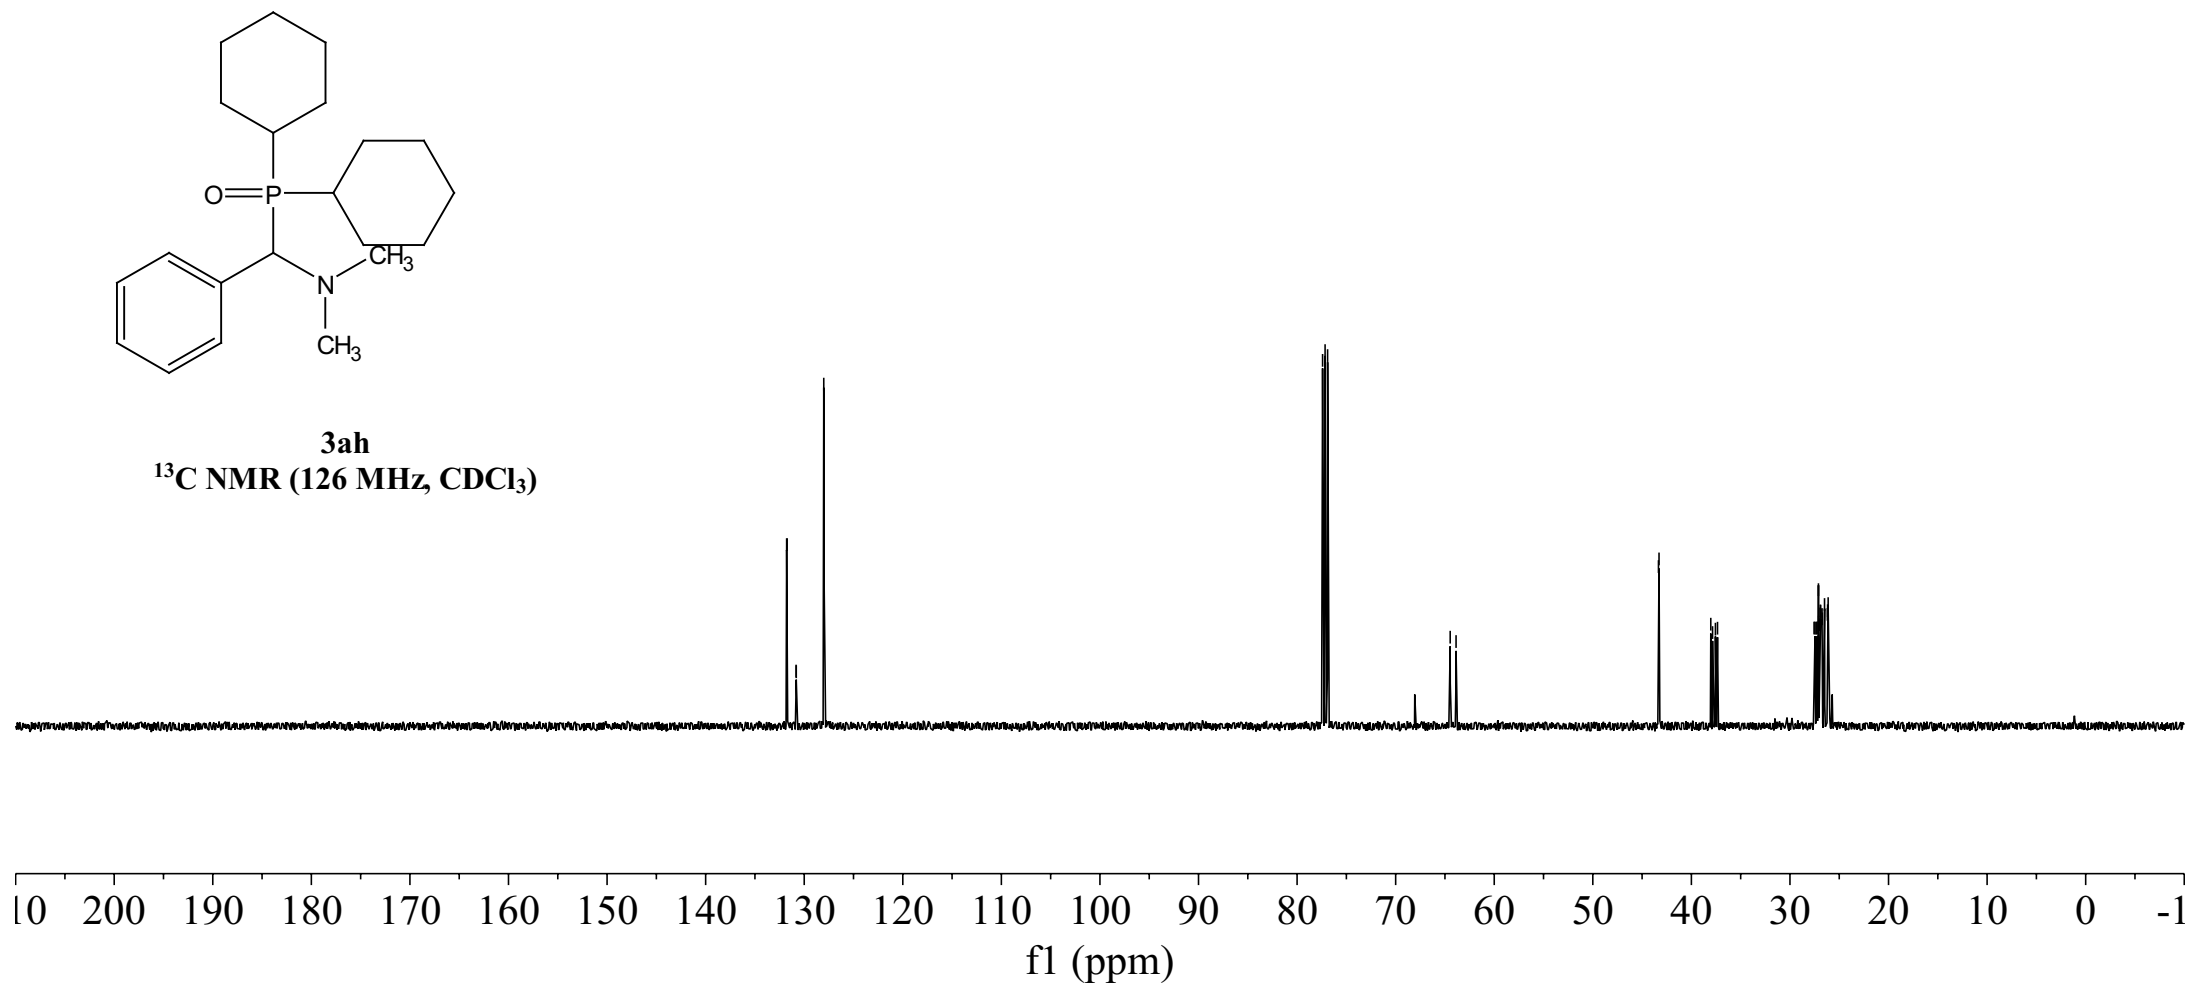

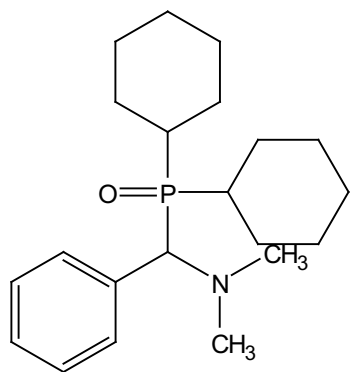

**3ah**

**<sup>31</sup>P NMR (202 MHz, CDCl<sub>3</sub>)**

—50.881

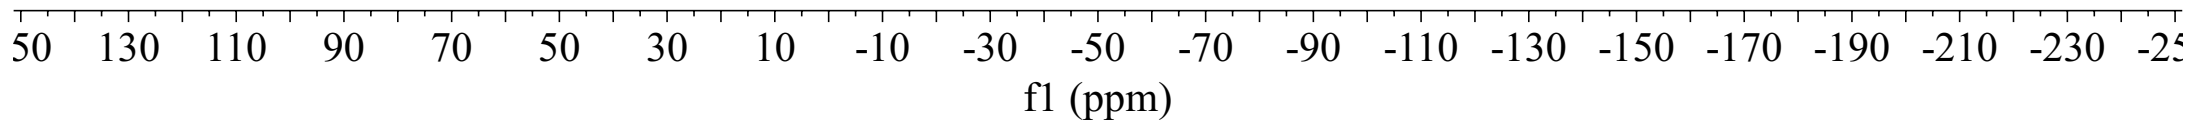

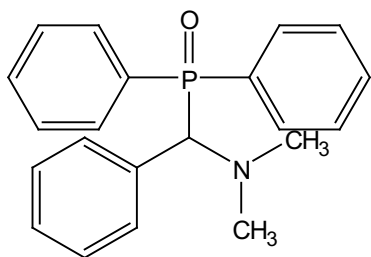

**3aj**

**<sup>1</sup>H NMR (400 MHz, CDCl<sub>3</sub>)**

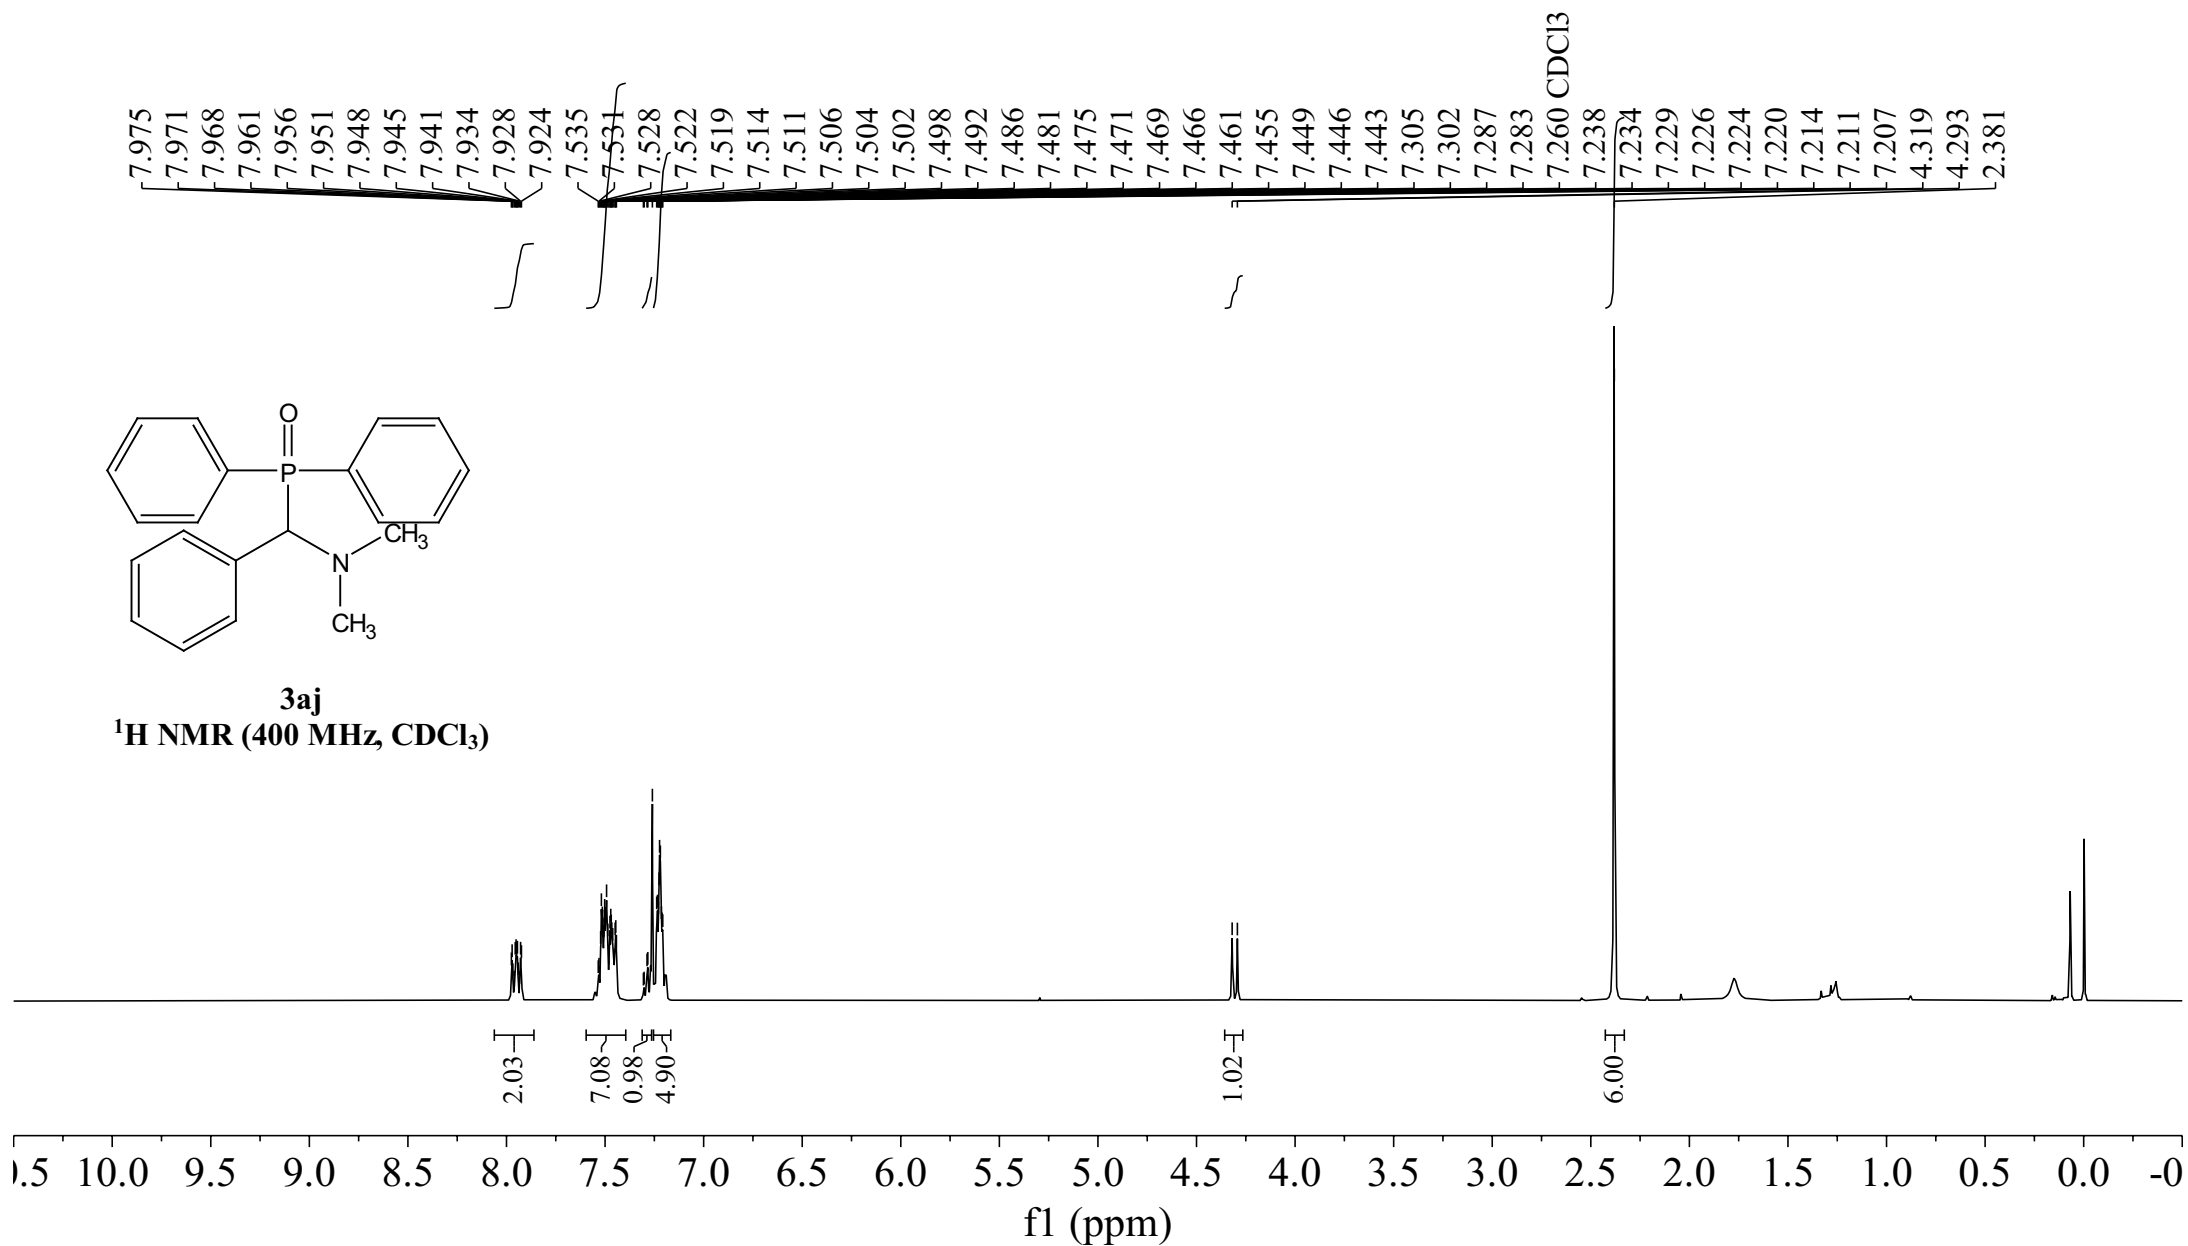

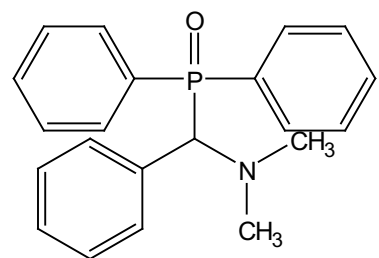

**3aj**  
**<sup>13</sup>C NMR (126 MHz, CDCl<sub>3</sub>)**

133.700  
133.184  
132.915  
132.429  
131.619  
131.551  
131.531  
131.512  
131.470  
131.163  
131.145  
131.122  
131.095  
130.792  
130.769  
128.475  
128.384  
128.130  
128.040  
127.945  
127.889  
  
77.414  
77.160 CDCl<sub>3</sub>  
76.906  
69.341  
68.646  
  
43.785  
43.725

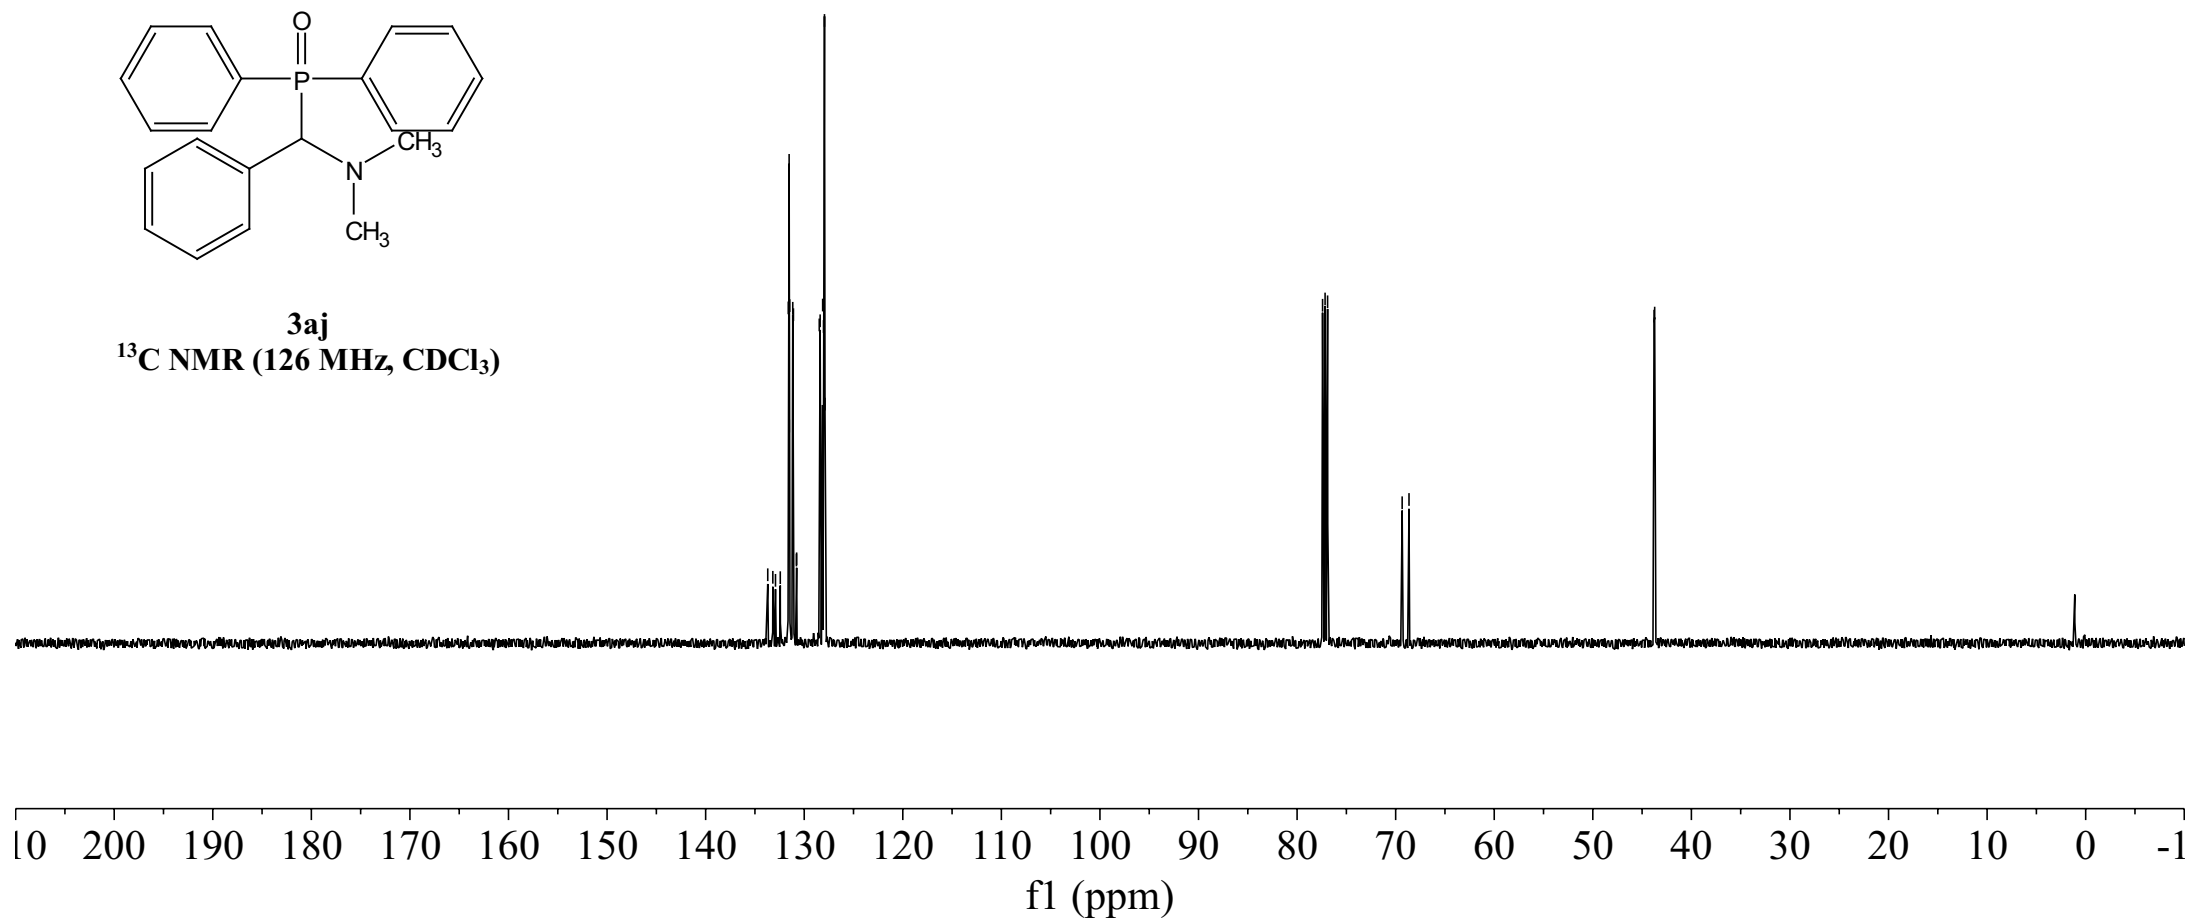

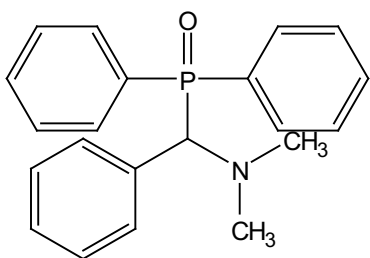

**3aj**  
**<sup>31</sup>P NMR (162 MHz, CDCl<sub>3</sub>)**

—30.761



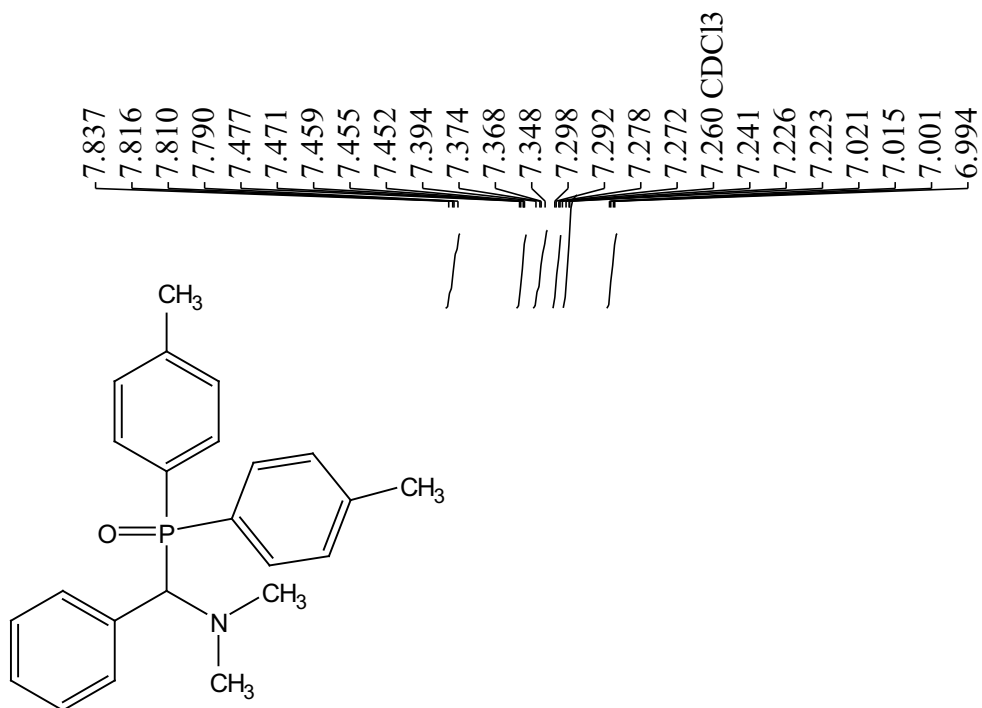

**3ak**  
<sup>1</sup>H NMR (400 MHz, CDCl<sub>3</sub>)

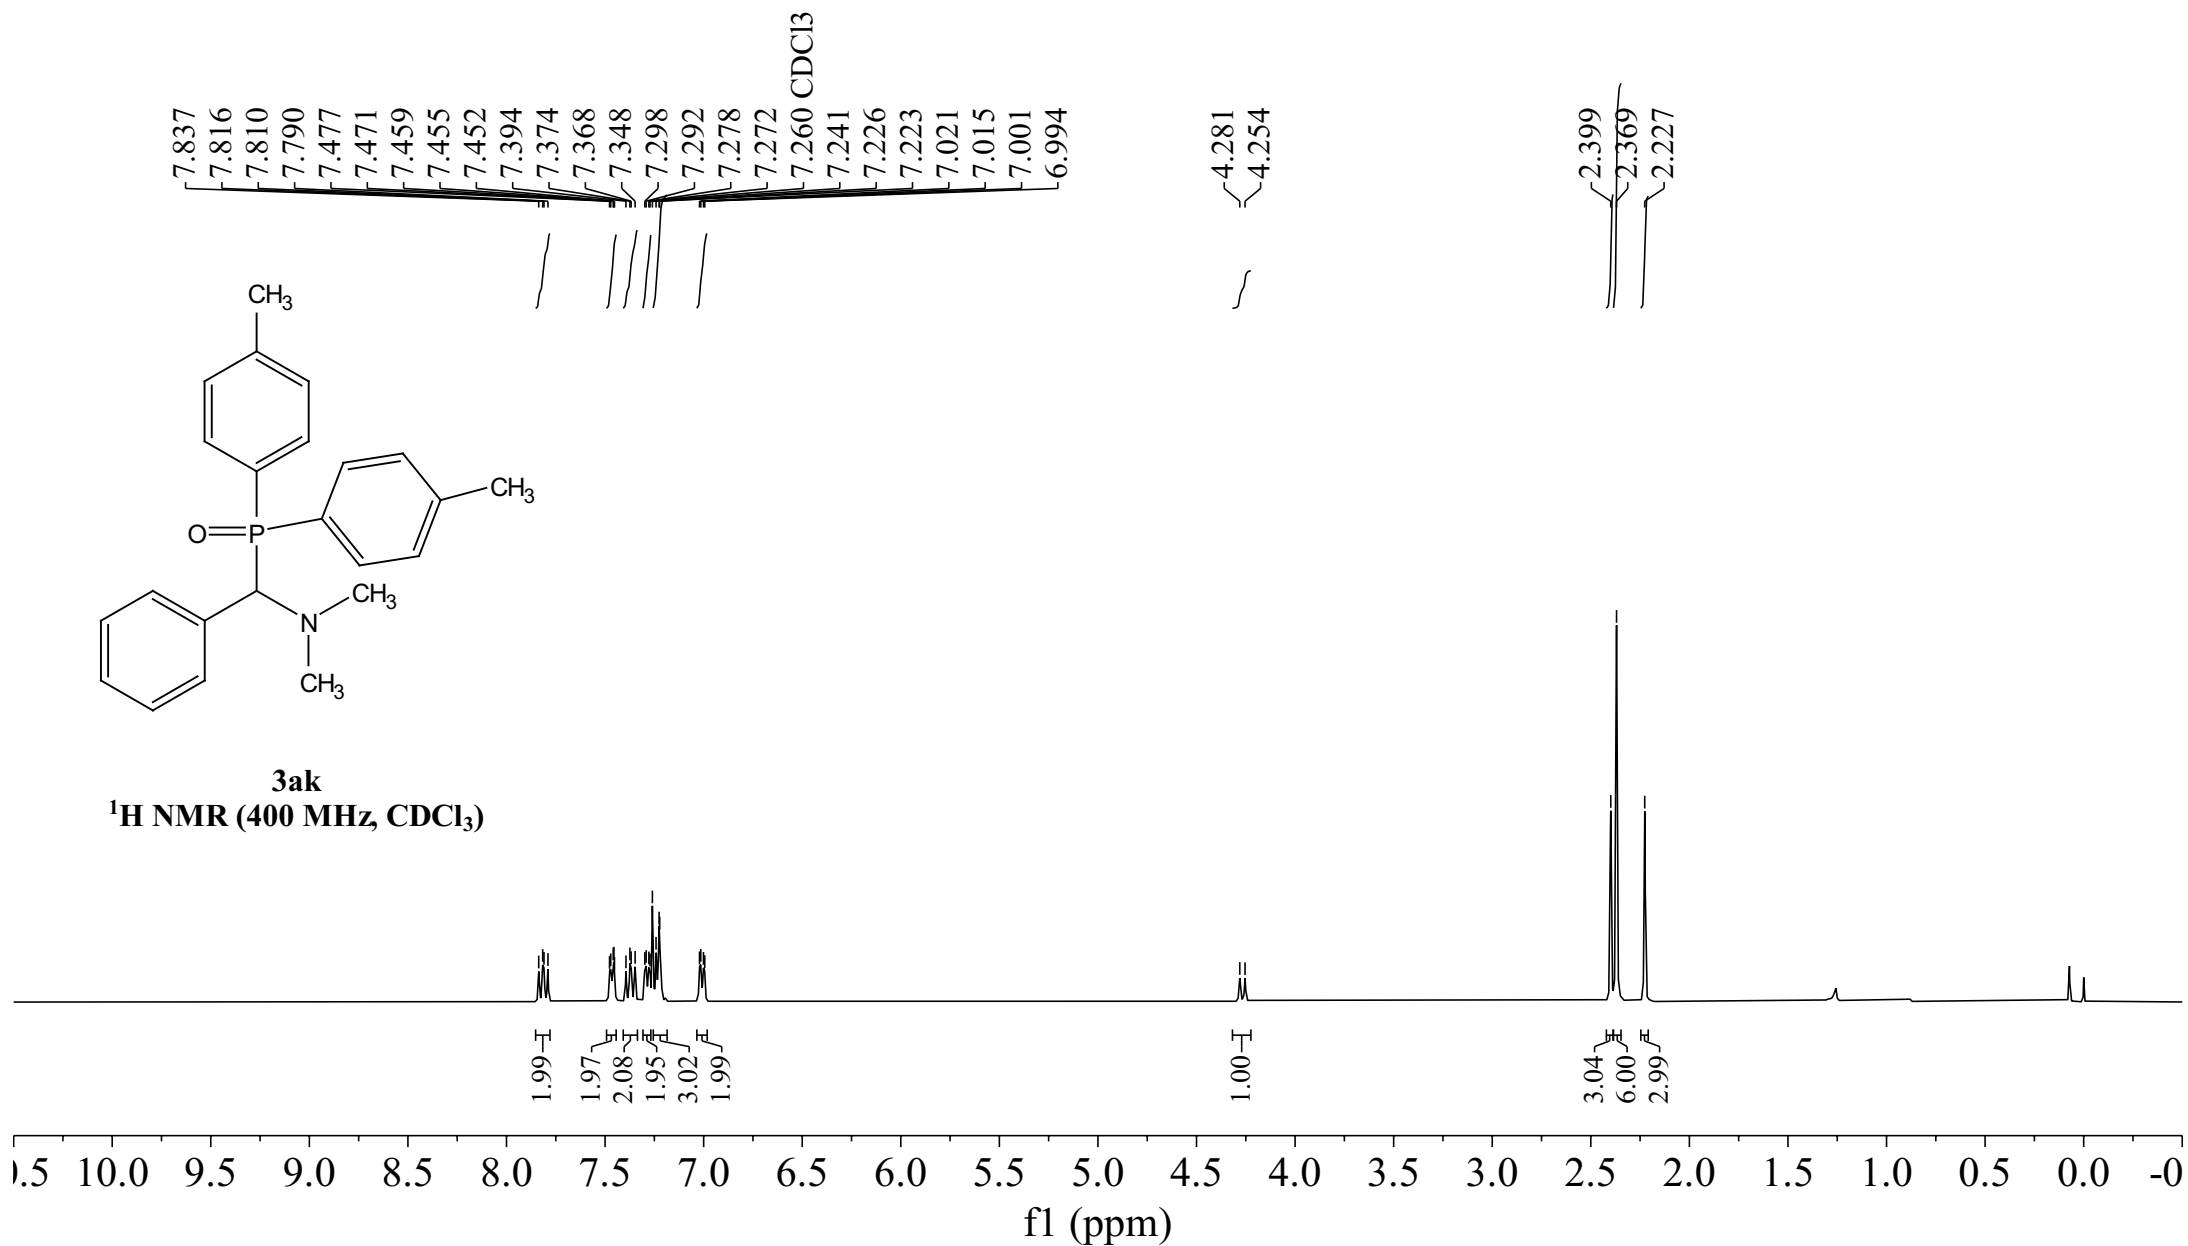

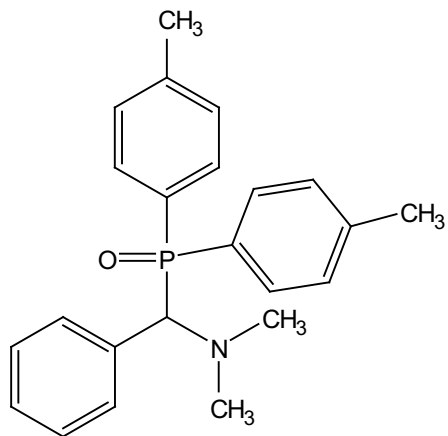

**3ak**

<sup>13</sup>C NMR (100 MHz, CDCl<sub>3</sub>)

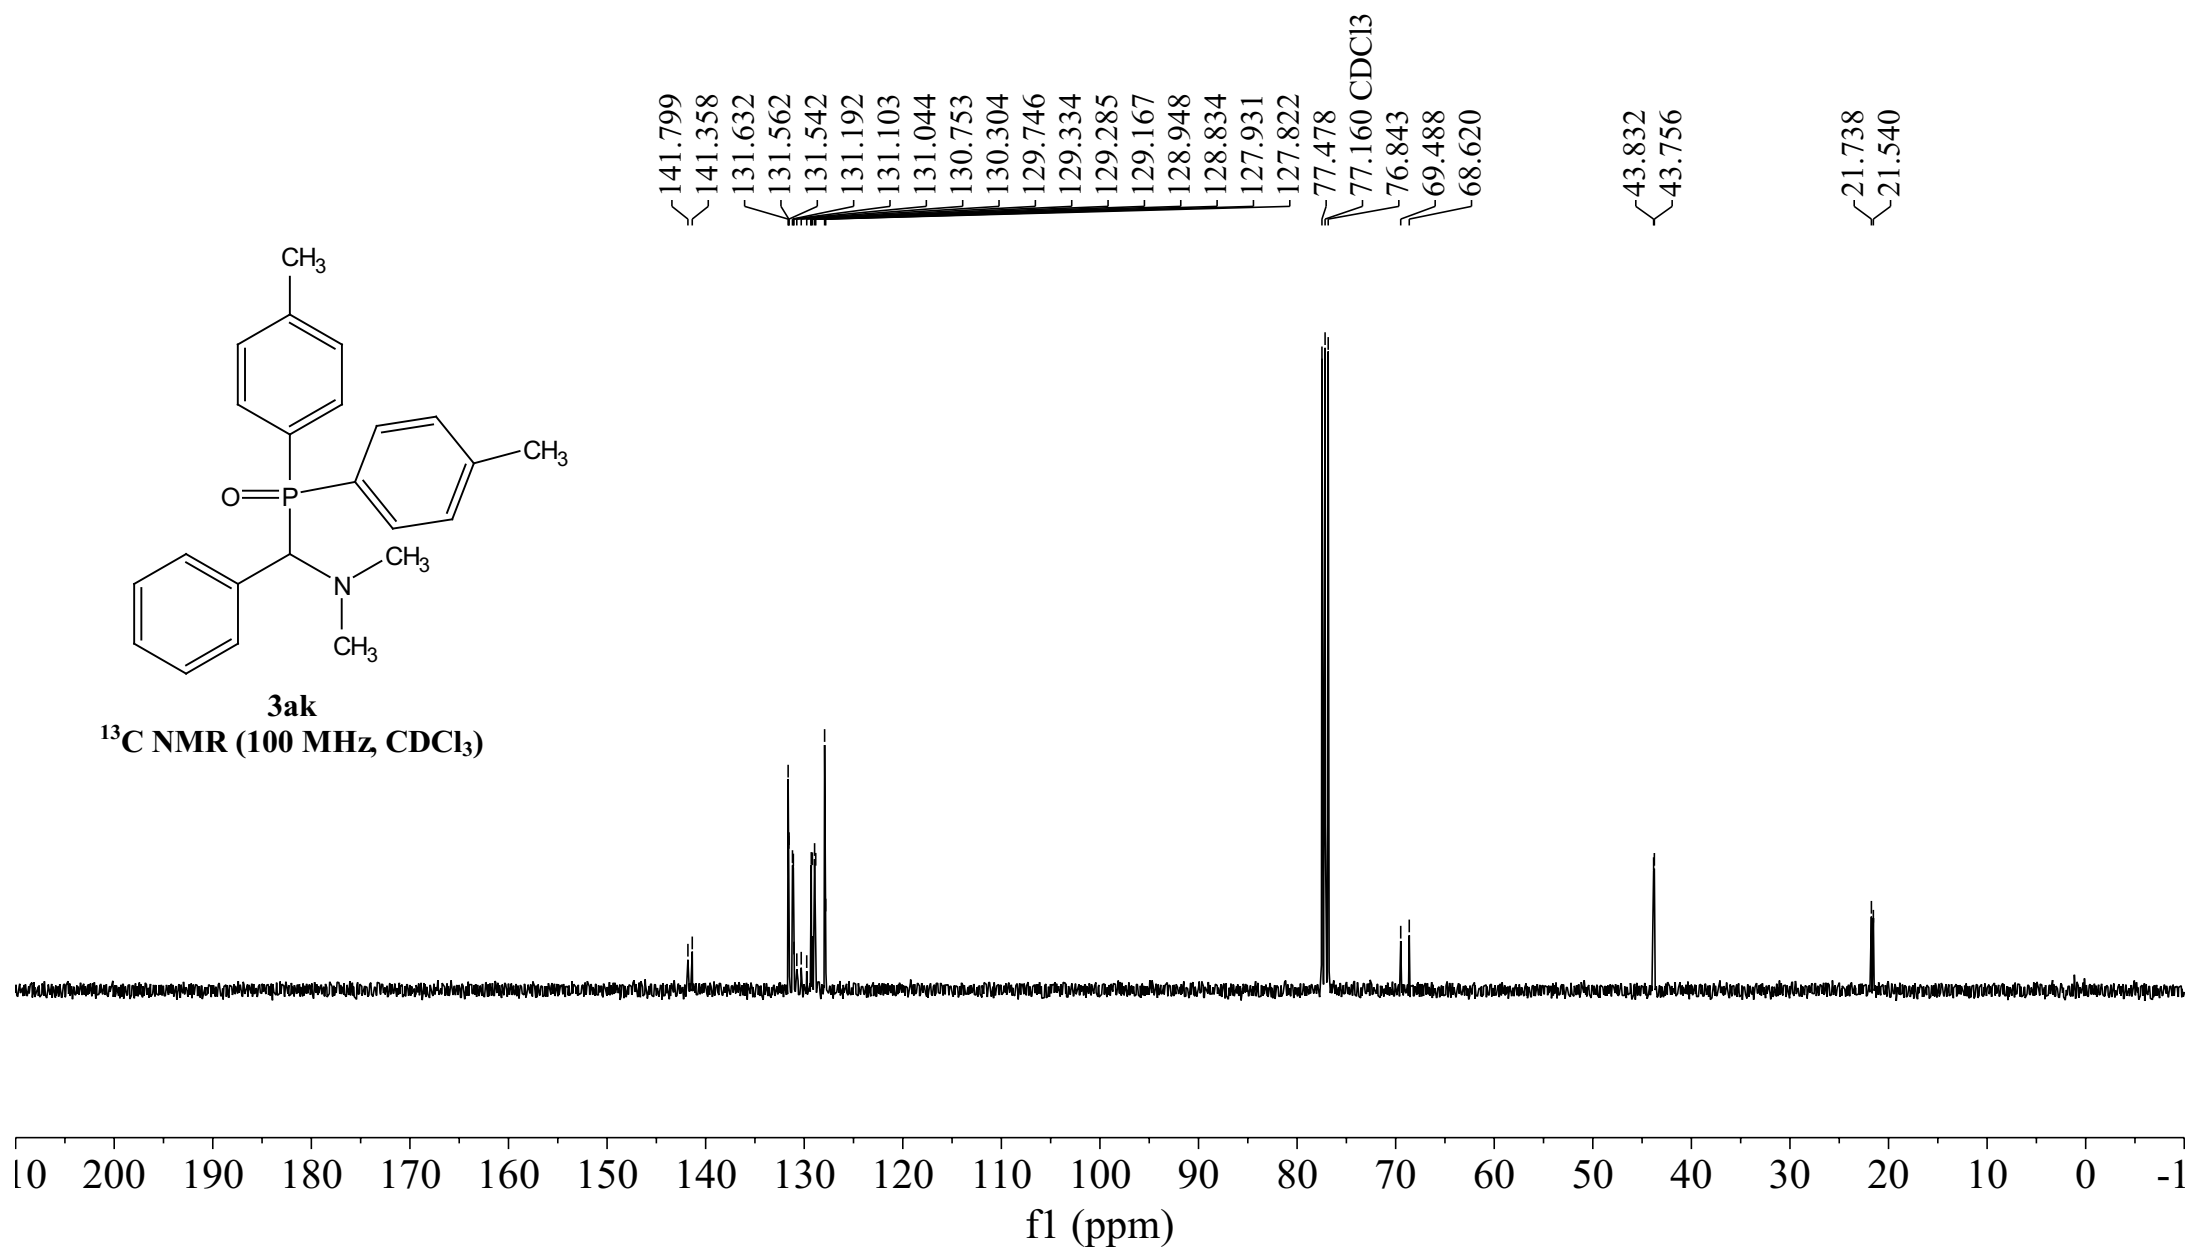



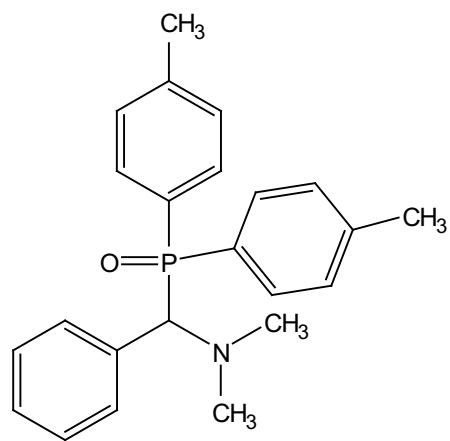

**3ak**

**$^{31}\text{P}$  NMR (162 MHz,  $\text{CDCl}_3$ )**

—31.134



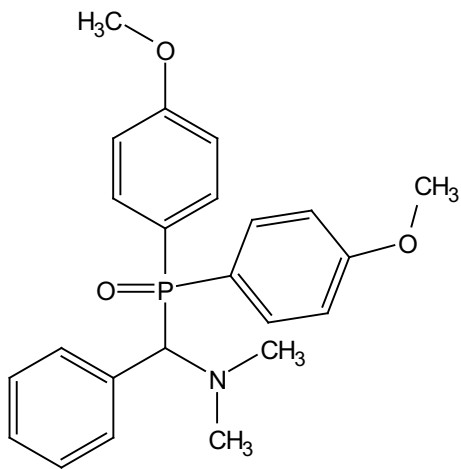

**3al**

**<sup>1</sup>H NMR (400 MHz, CDCl<sub>3</sub>)**

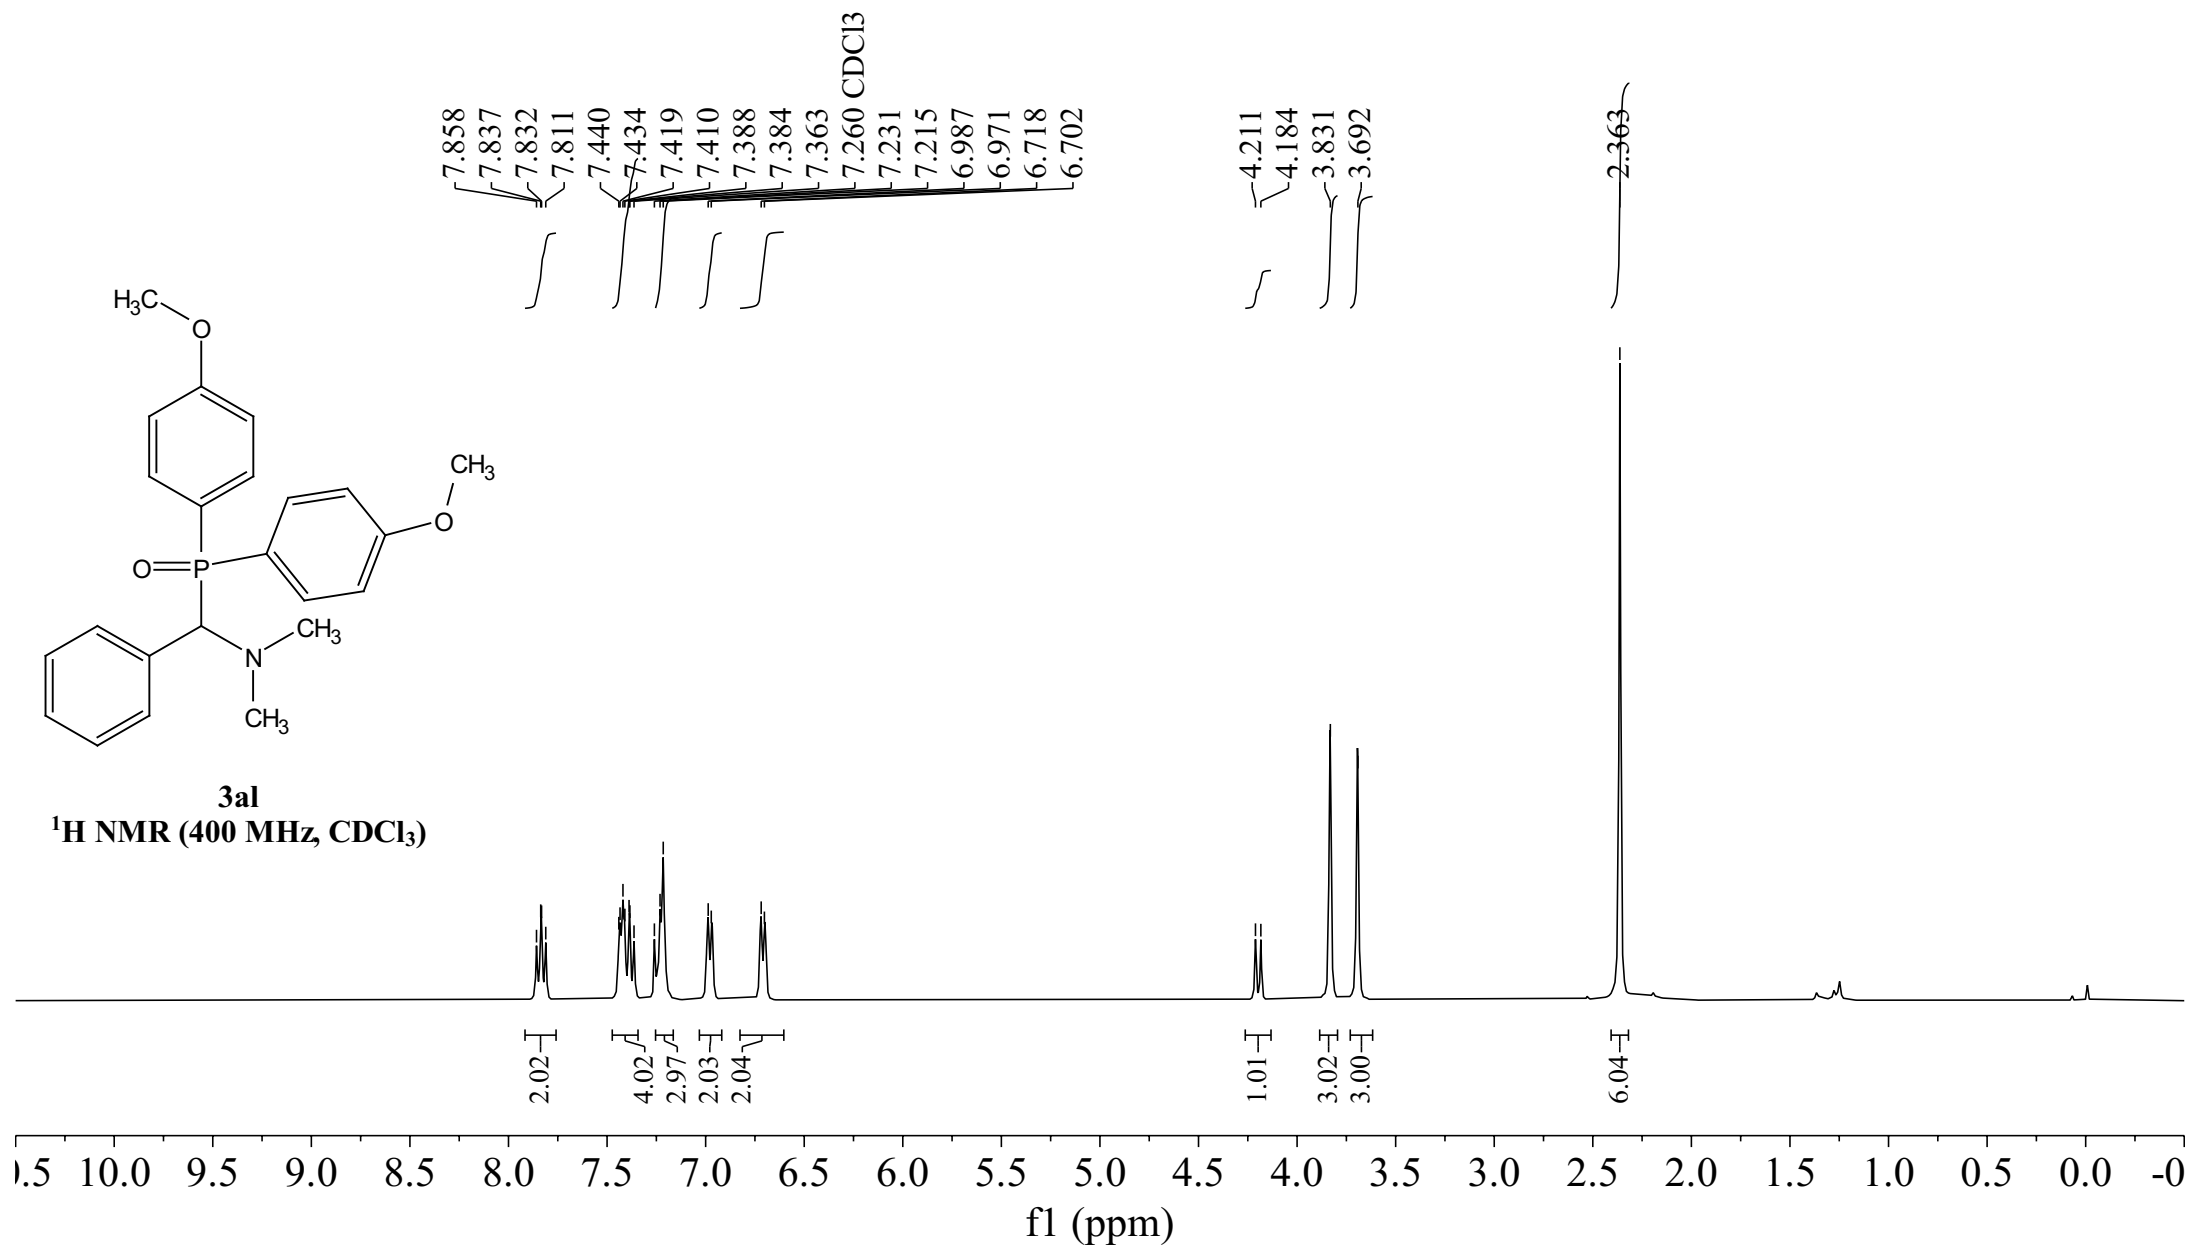

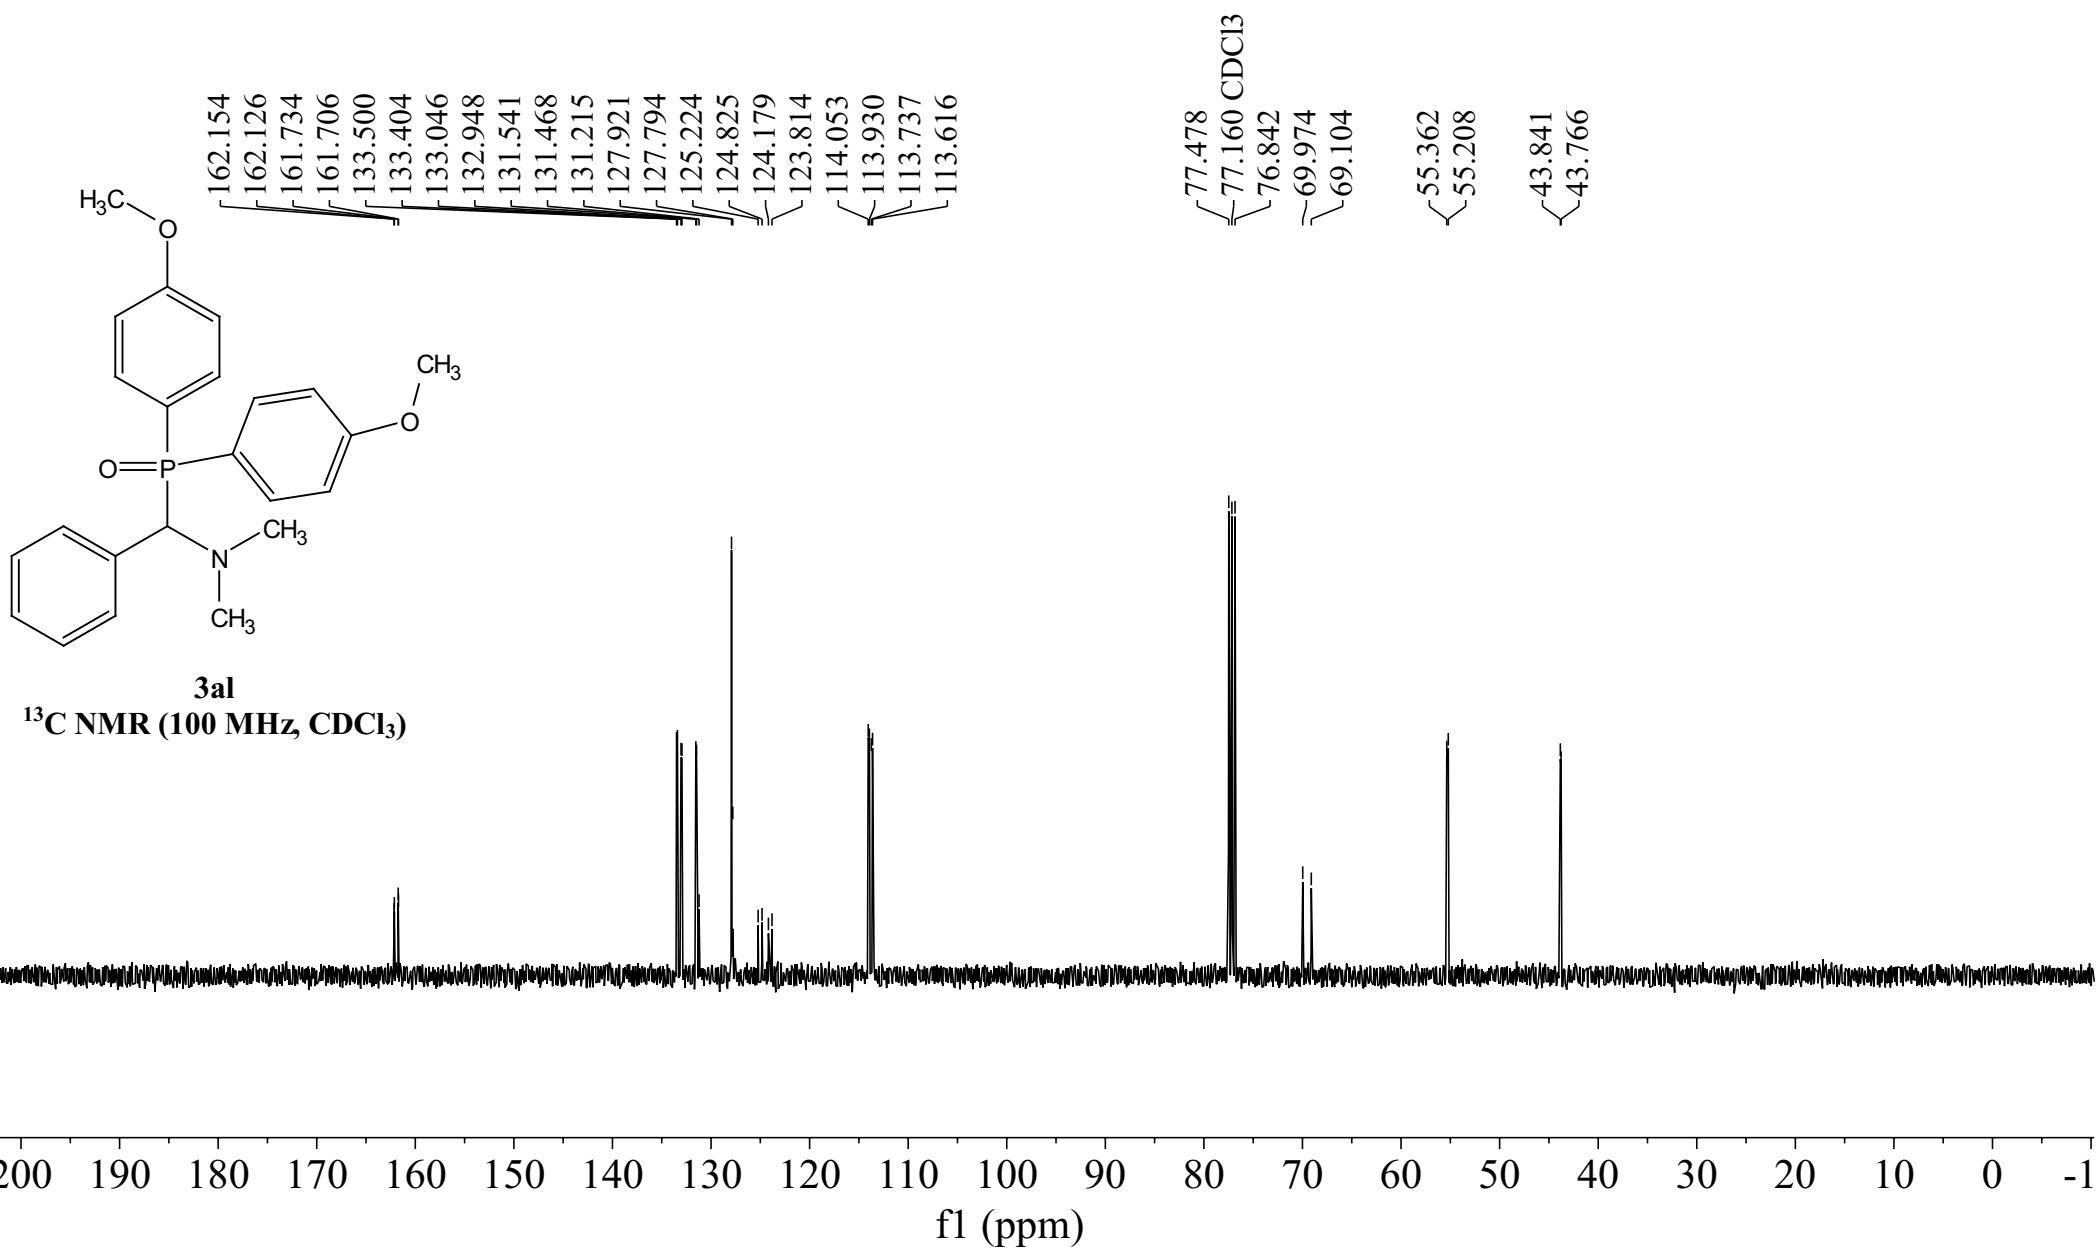

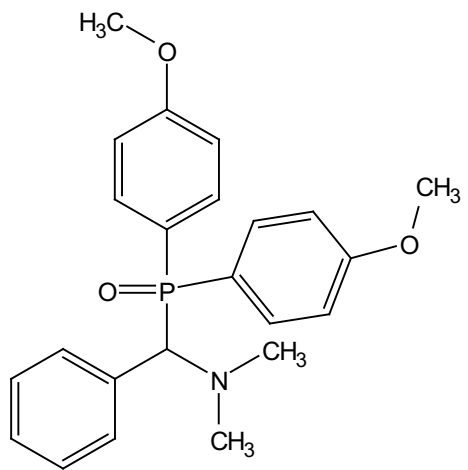

**3al**

<sup>31</sup>P NMR (162 MHz, CDCl<sub>3</sub>)

—30.991



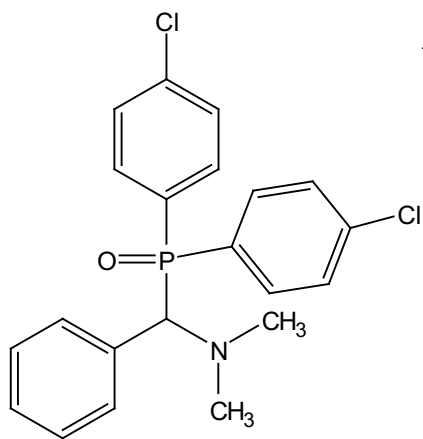

**3am**  
**<sup>1</sup>H NMR (400 MHz, CDCl<sub>3</sub>)**

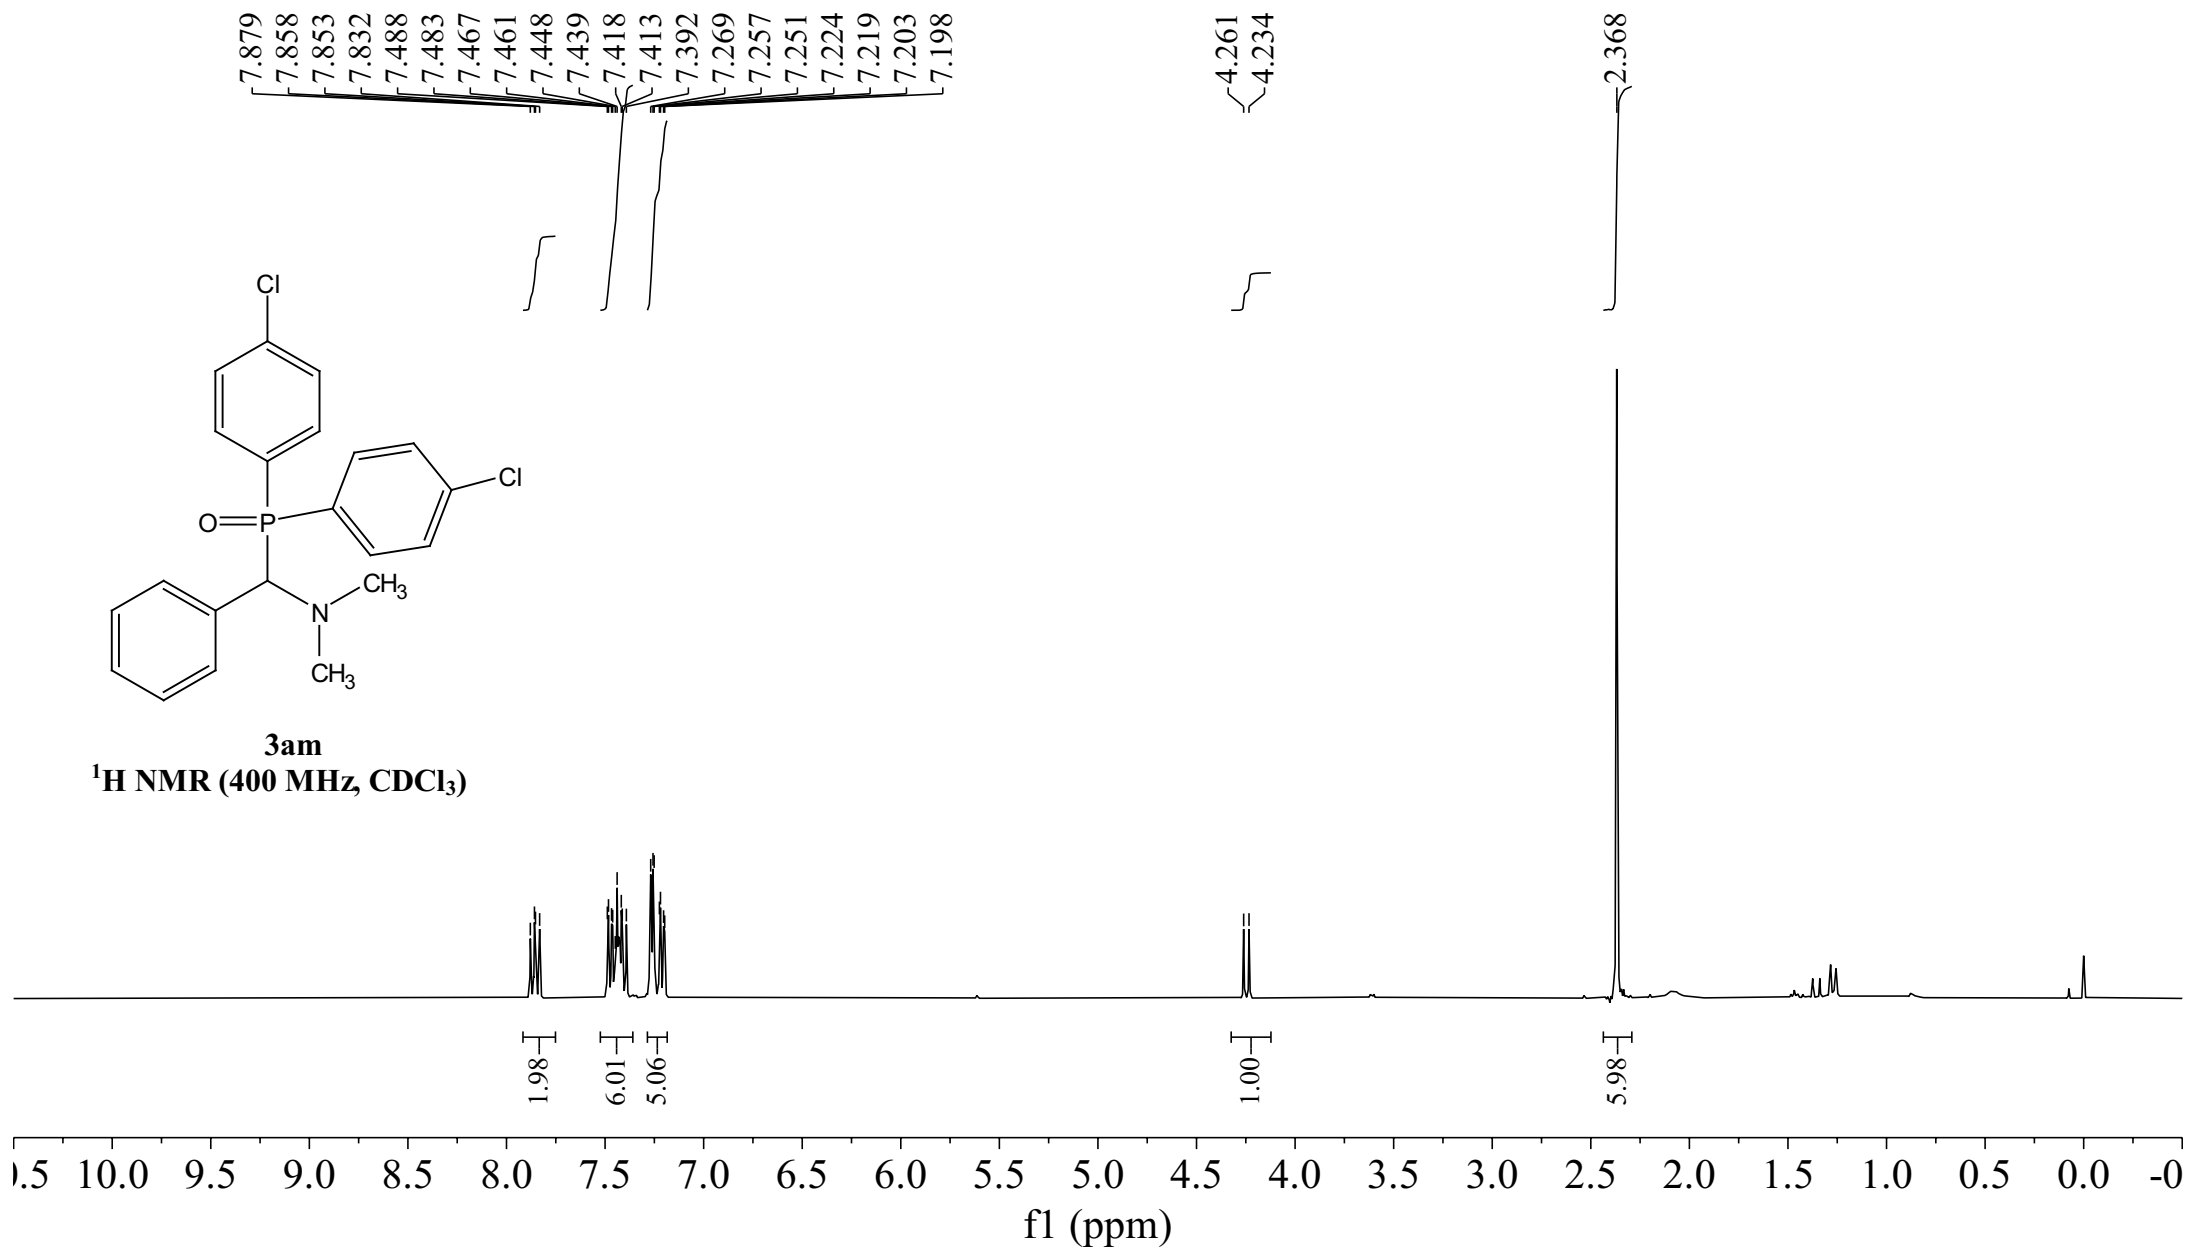

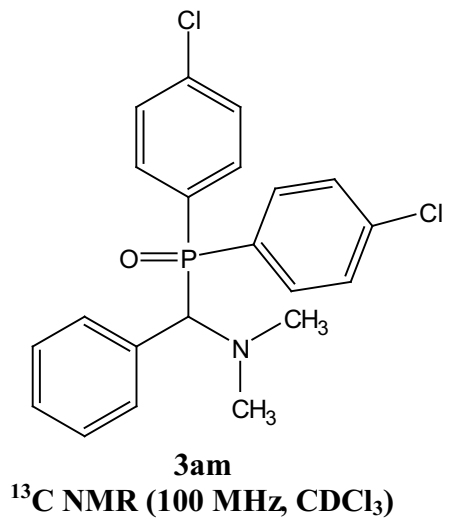

138.389  
 138.355  
 138.029  
 137.995  
 133.058  
 132.966  
 132.555  
 132.463  
 131.877  
 131.485  
 131.408  
 130.877  
 130.435  
 130.094  
 129.001  
 128.881  
 128.724  
 128.607  
 128.298  
 128.221

77.478  
 77.160 CDCl<sub>3</sub>  
 76.842  
 69.506  
 68.621

43.748  
 43.671

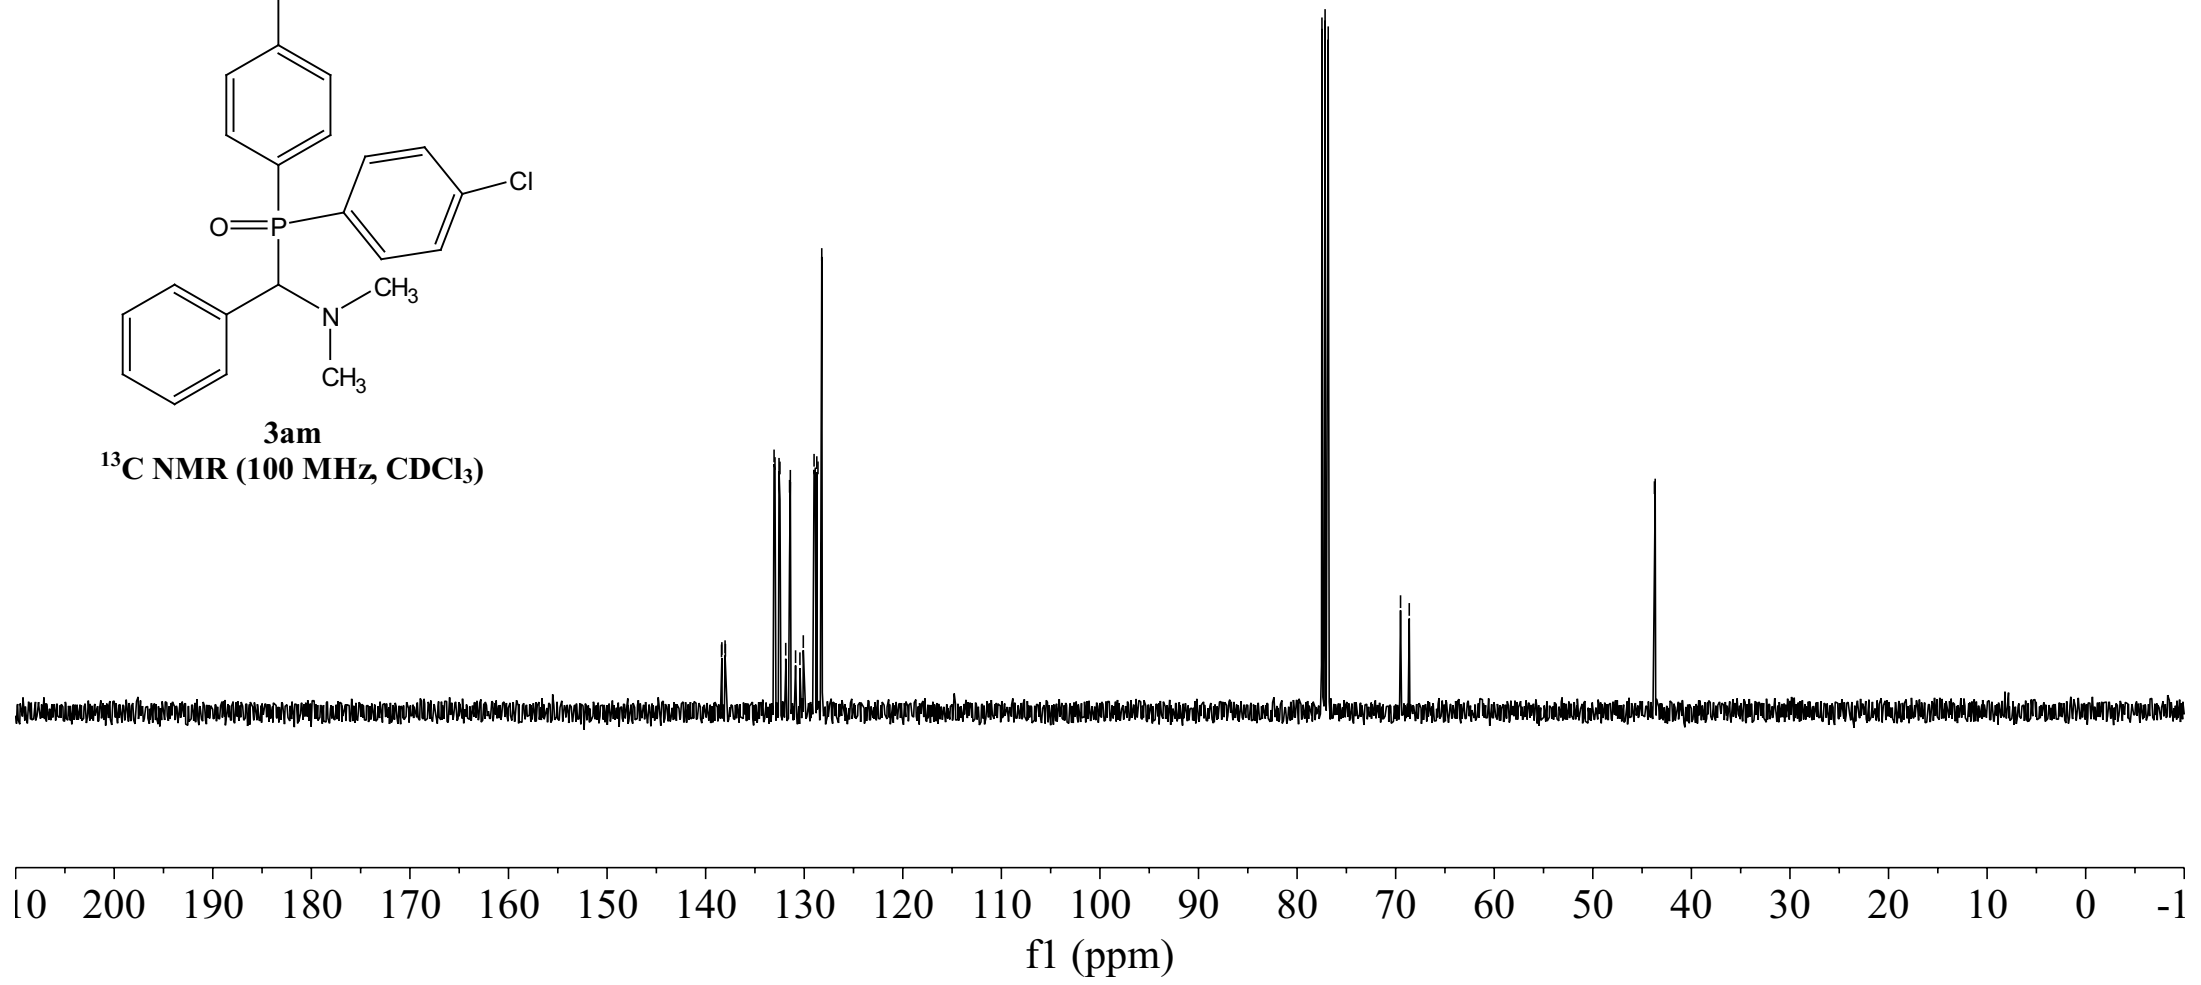

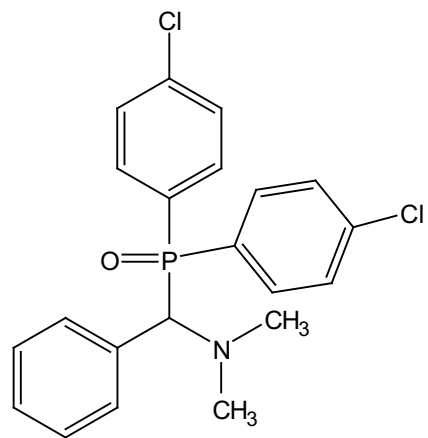

**3am**

**<sup>31</sup>P NMR (162 MHz, CDCl<sub>3</sub>)**

—29.821



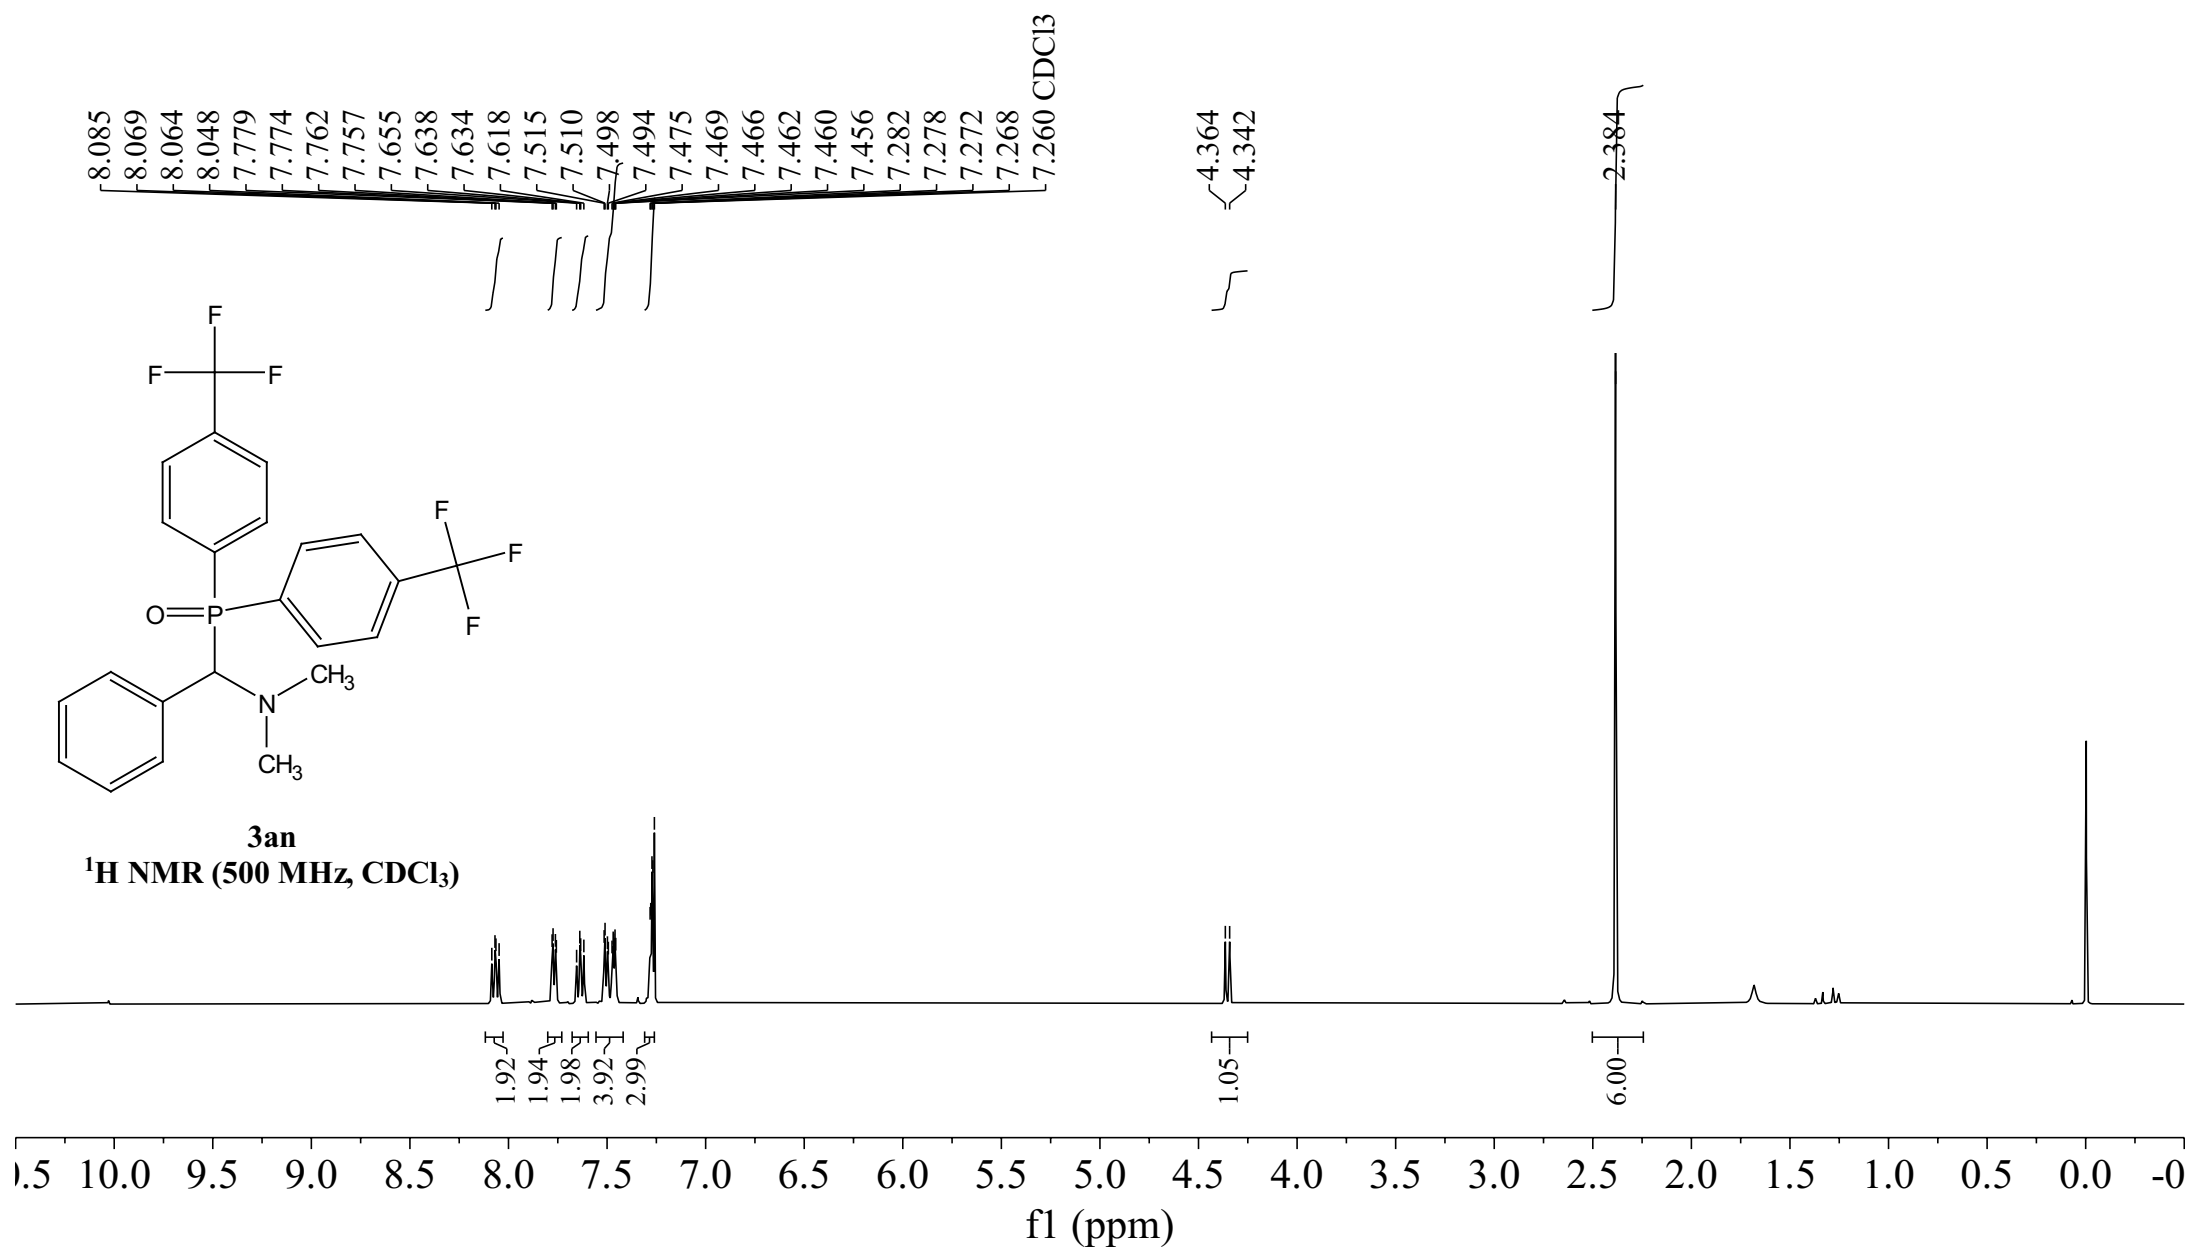



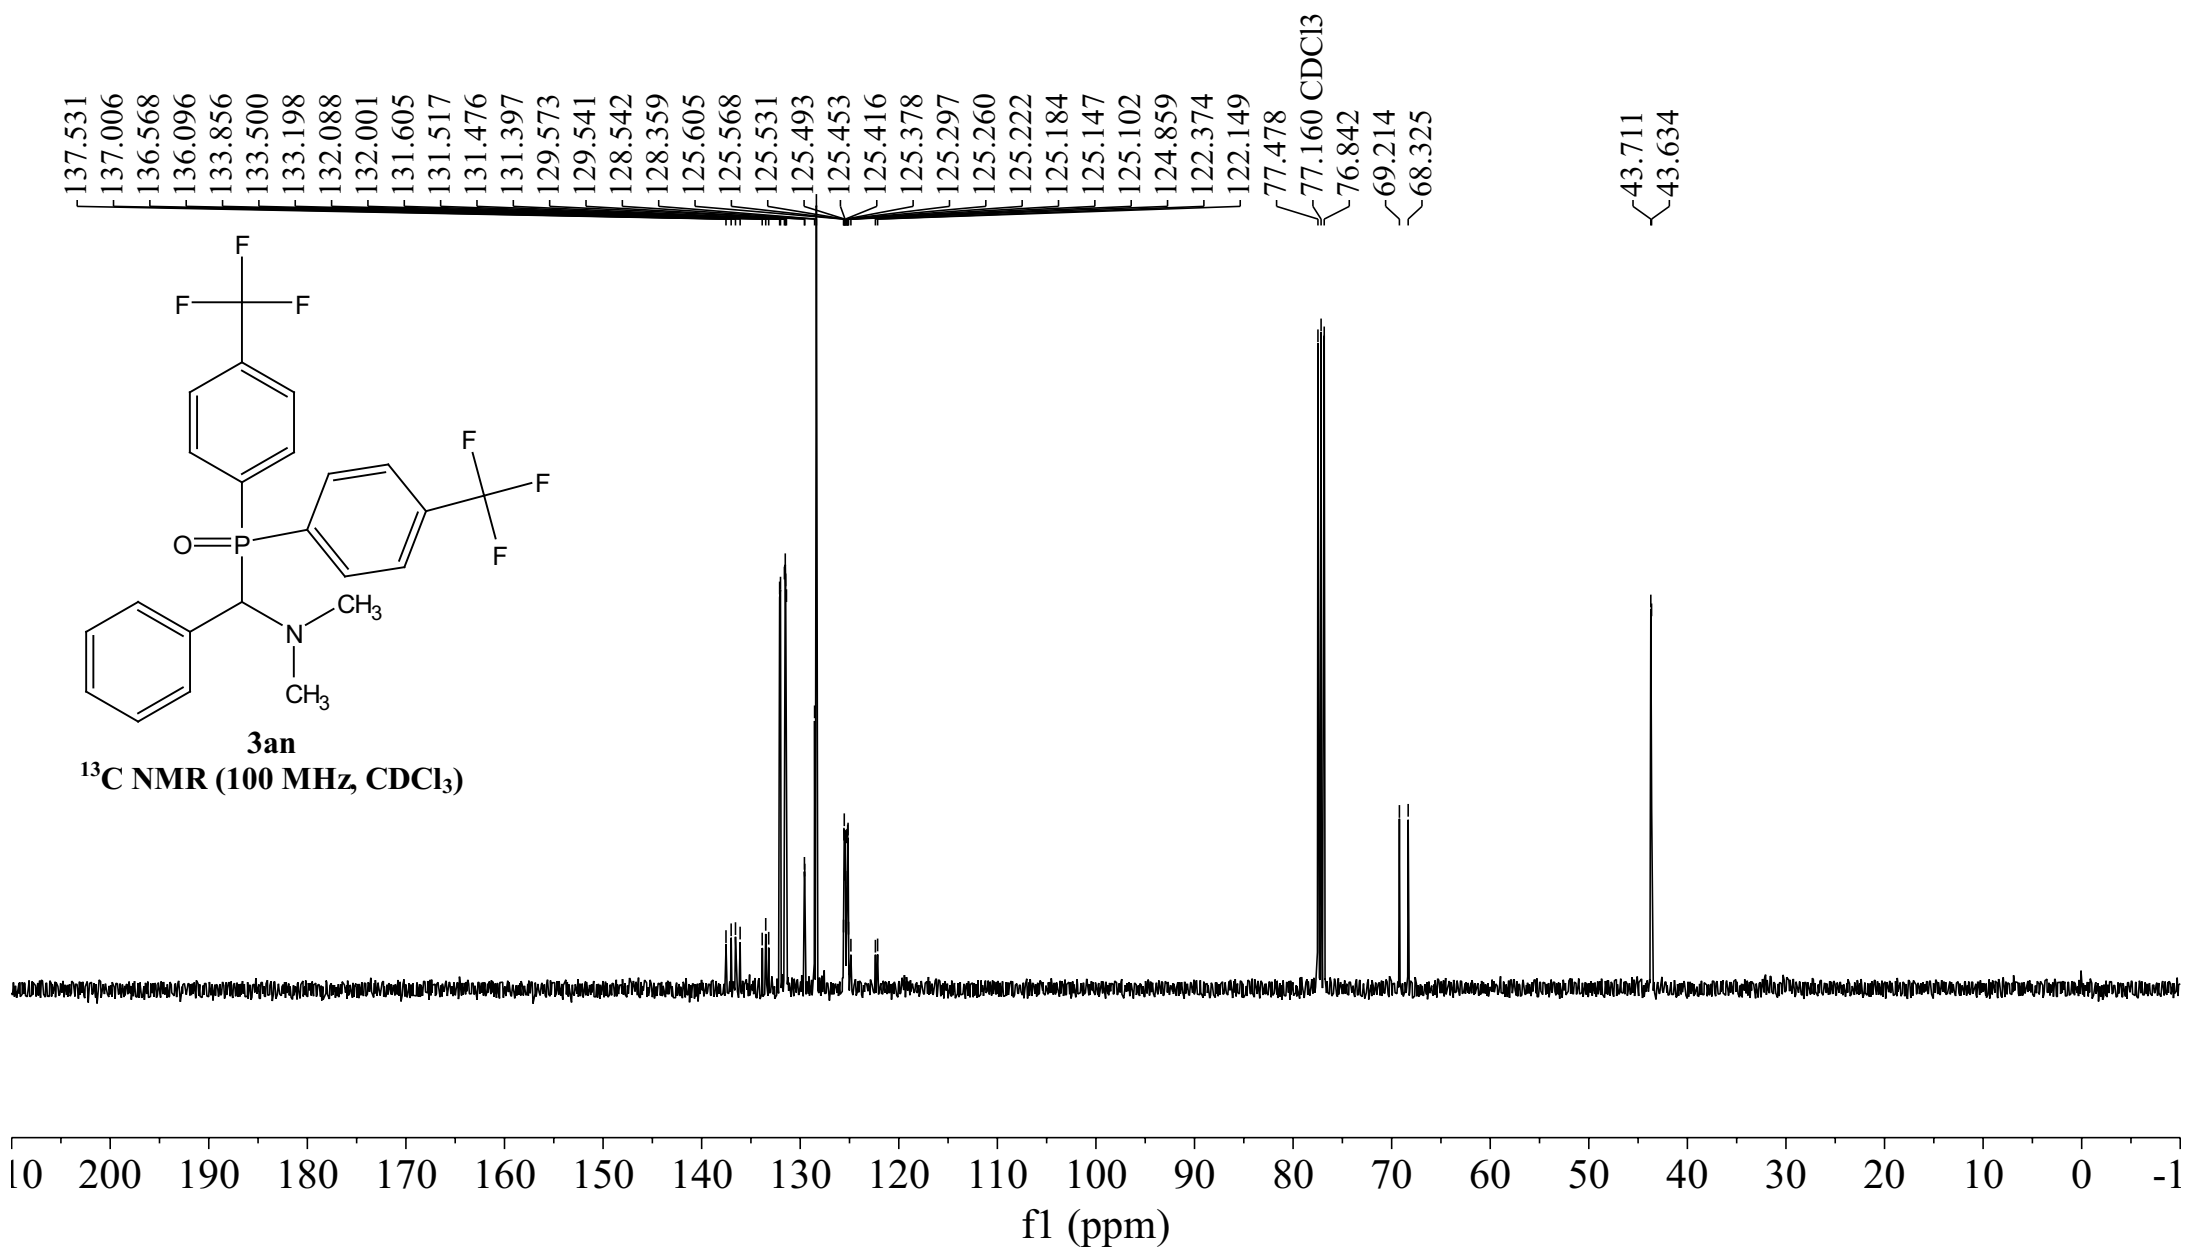

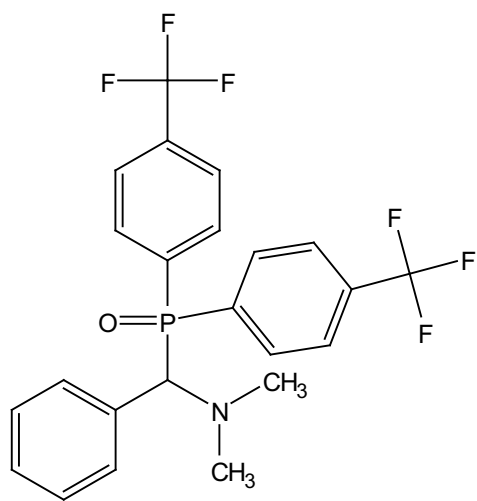

3an

<sup>31</sup>P NMR (162 MHz, CDCl<sub>3</sub>)

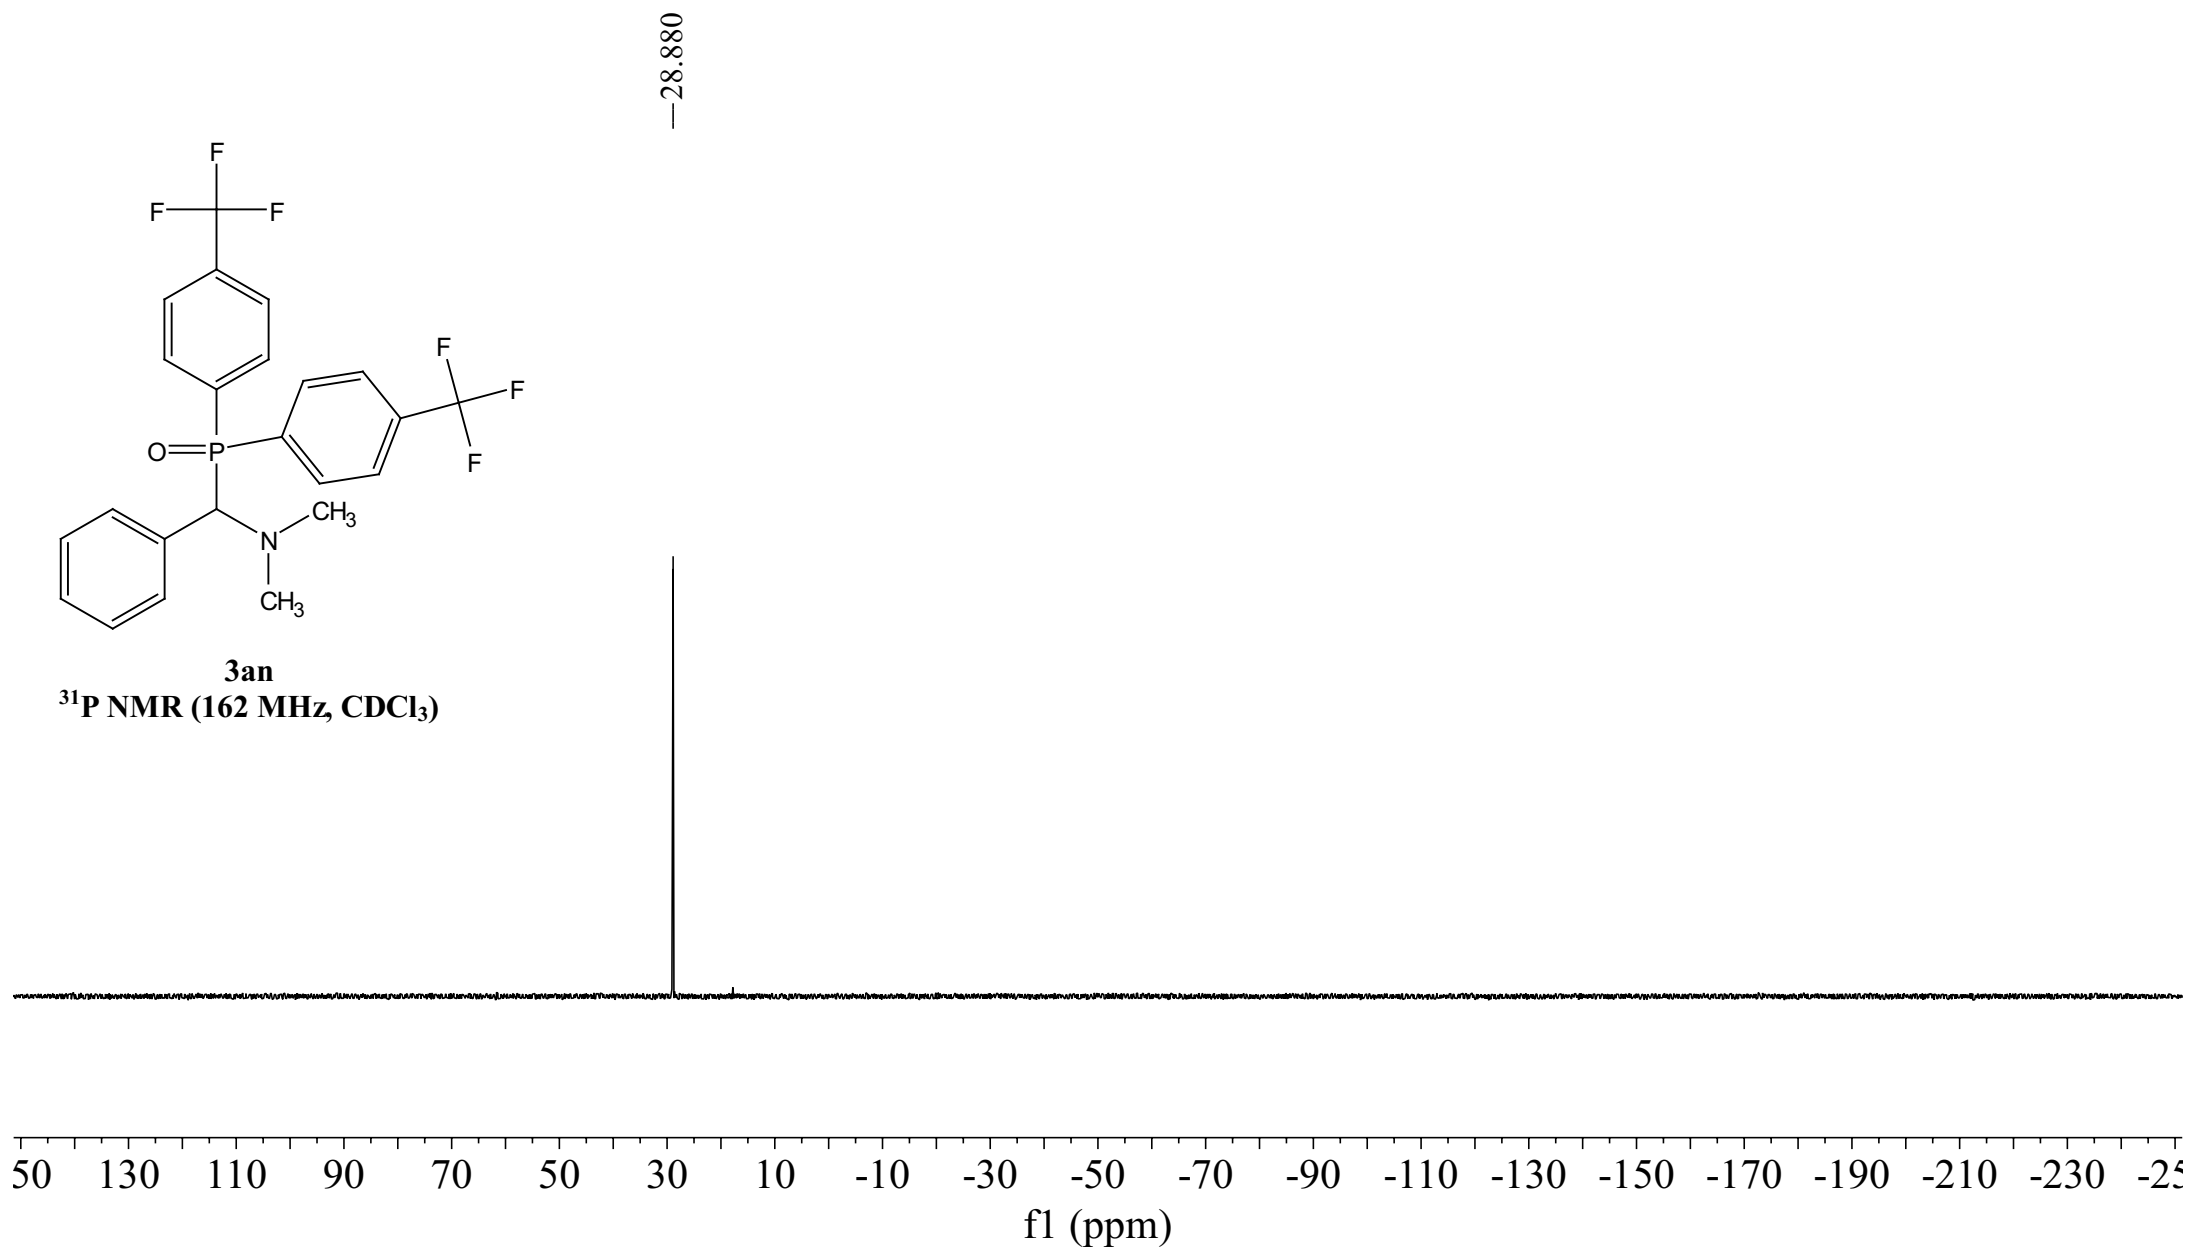

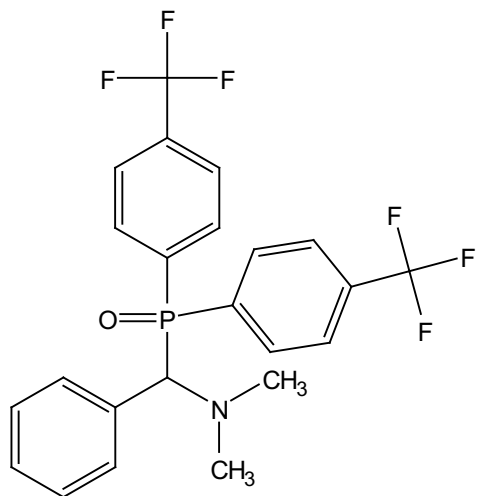

3an

$^{19}\text{F}$  NMR (376 MHz,  $\text{CDCl}_3$ )

-63.163  
-63.293

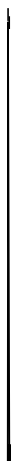

10 0 -10 -20 -30 -40 -50 -60 -70 -80 -90 -100 -110 -120 -130 -140 -150 -160 -170 -180 -190 -200 -210

f1 (ppm)

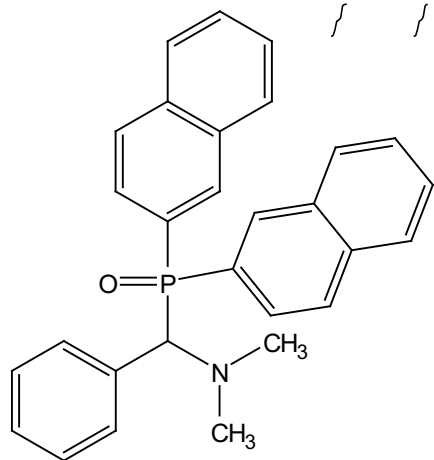

**3ao**

**<sup>1</sup>H NMR (400 MHz, CDCl<sub>3</sub>)**

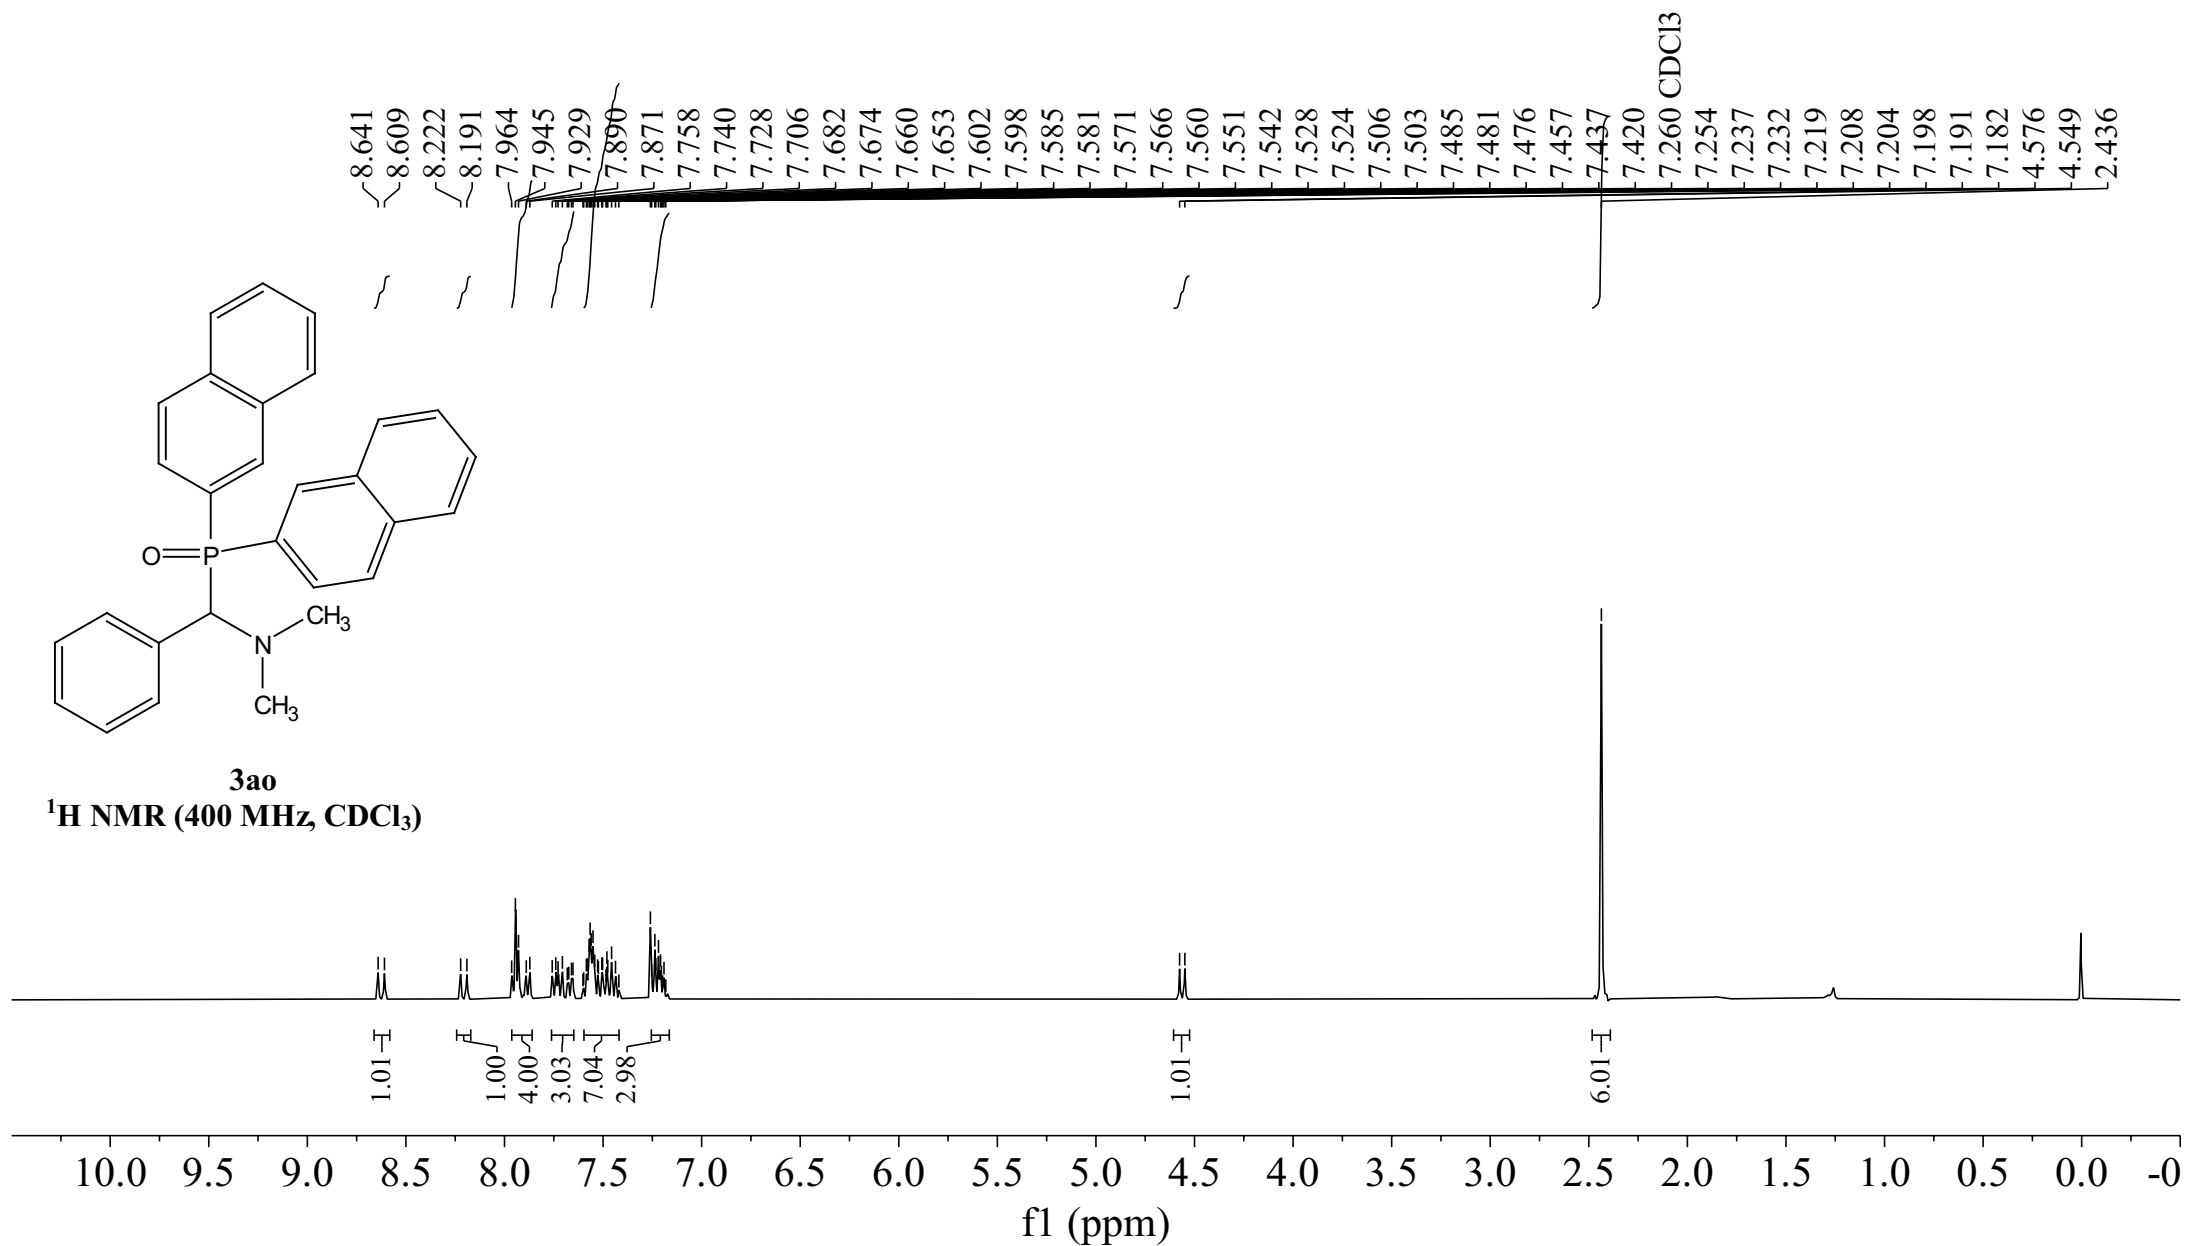

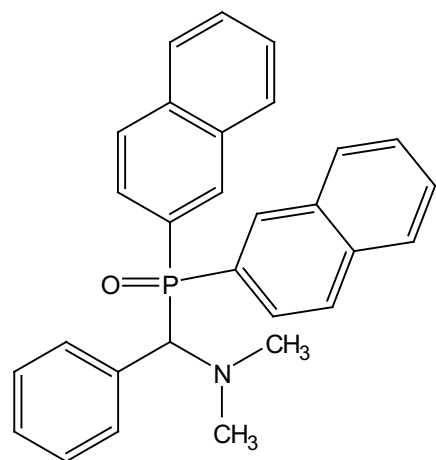

**3ao**

<sup>13</sup>C NMR (100 MHz, CDCl<sub>3</sub>)

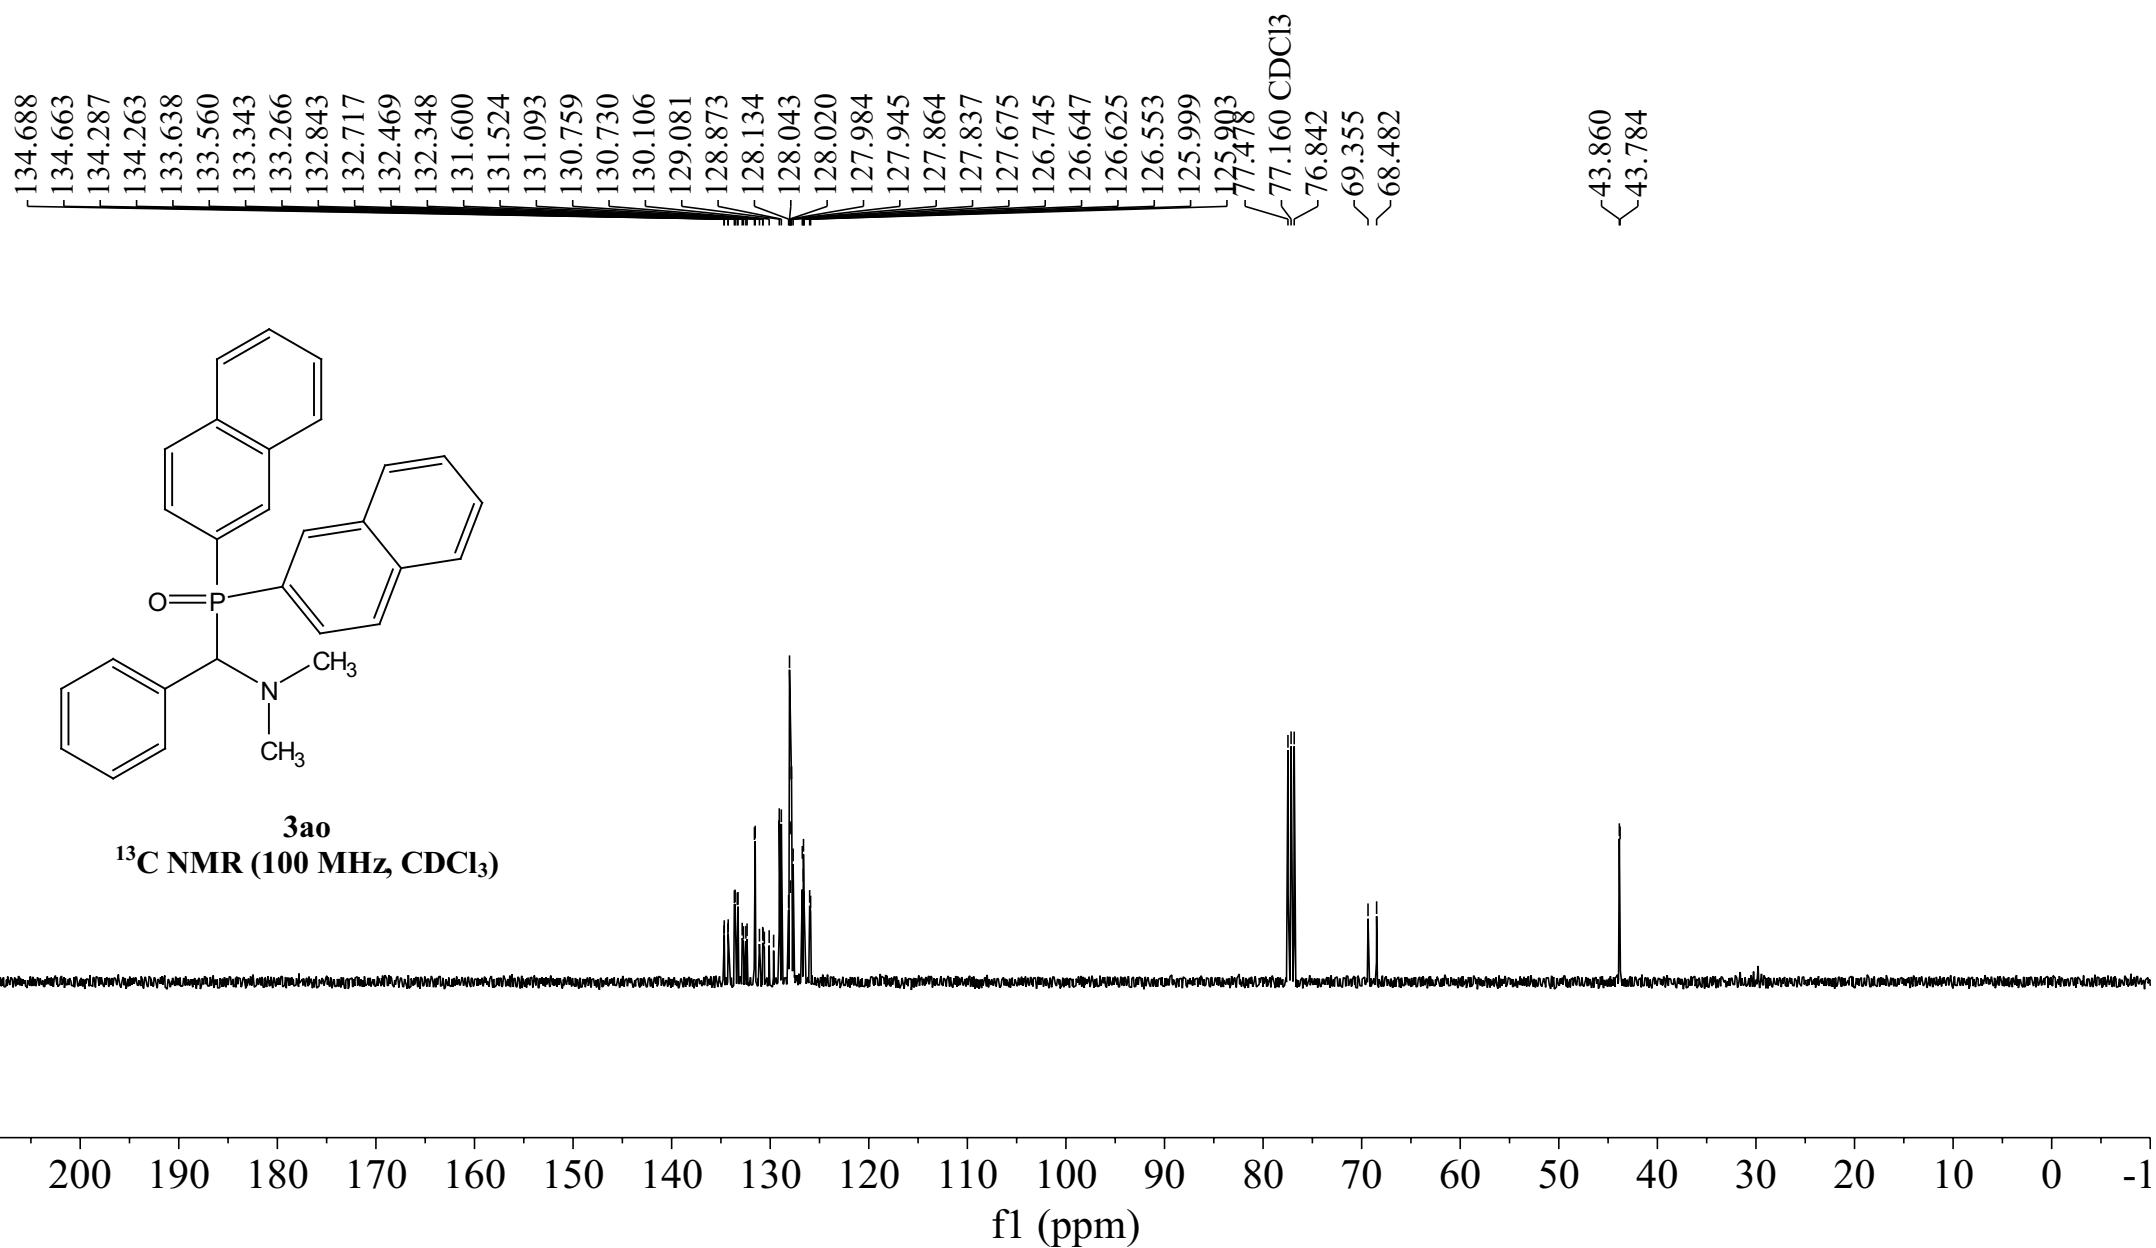

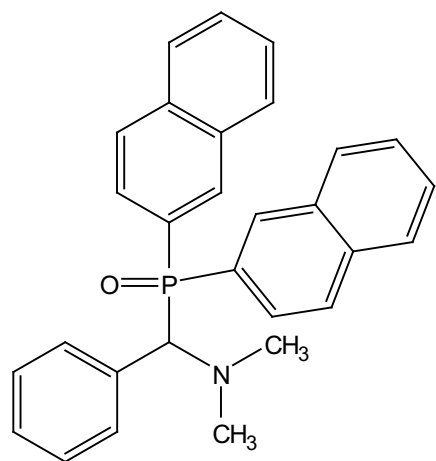

**3ao**

<sup>31</sup>P NMR (162 MHz, CDCl<sub>3</sub>)

—31.172



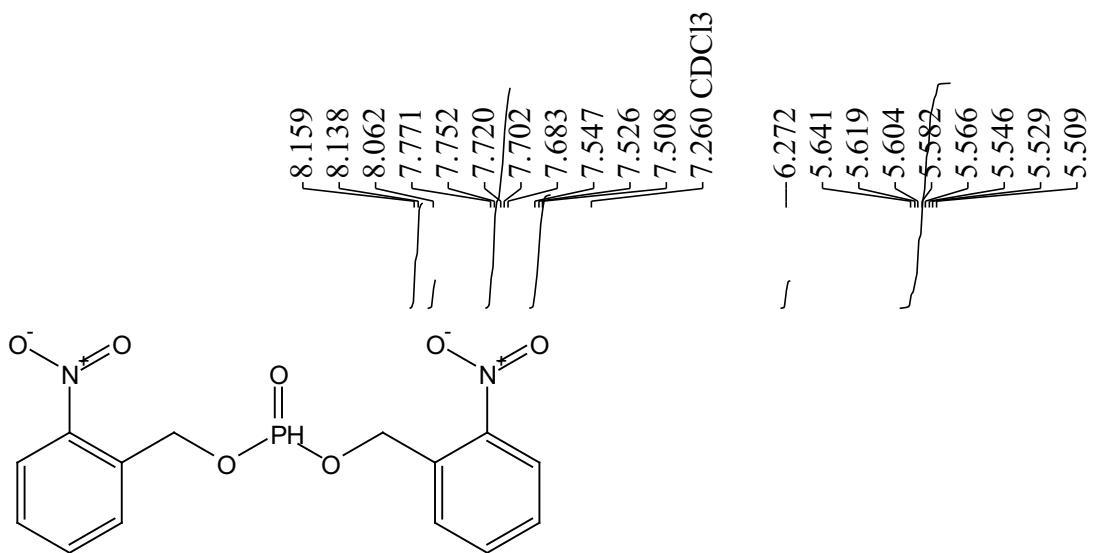

**2e**  
<sup>1</sup>H NMR (400 MHz, CDCl<sub>3</sub>)

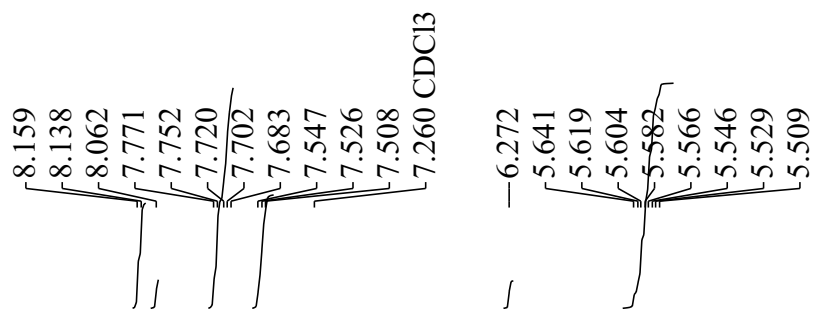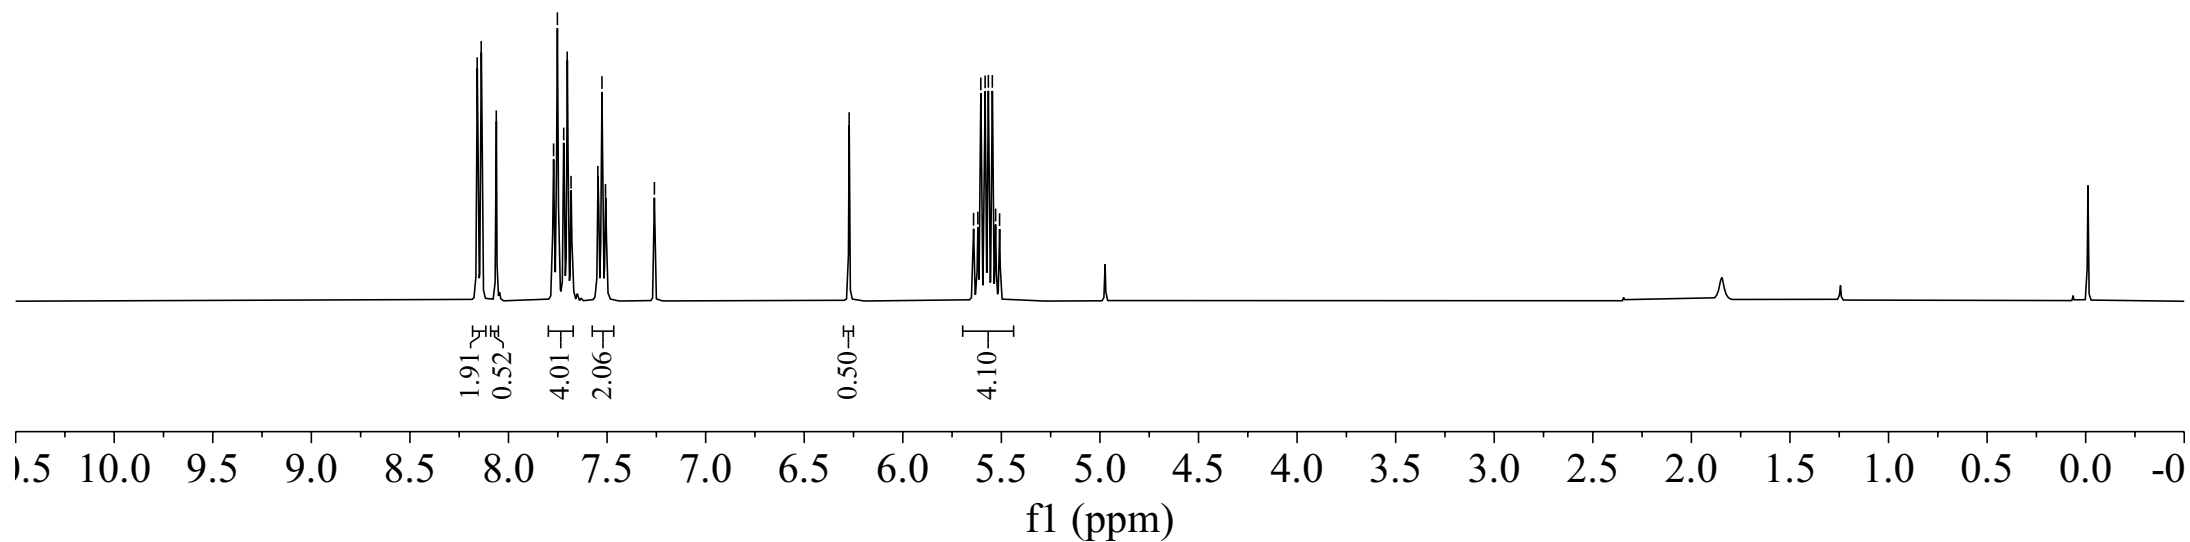

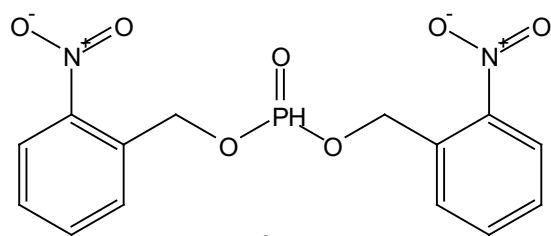

2e

<sup>13</sup>C NMR (150 MHz, CDCl<sub>3</sub>)

146.780  
134.277  
131.975  
131.924  
129.230  
128.702  
125.187

77.371  
77.160 CDCl<sub>3</sub>  
76.946  
64.239  
64.210

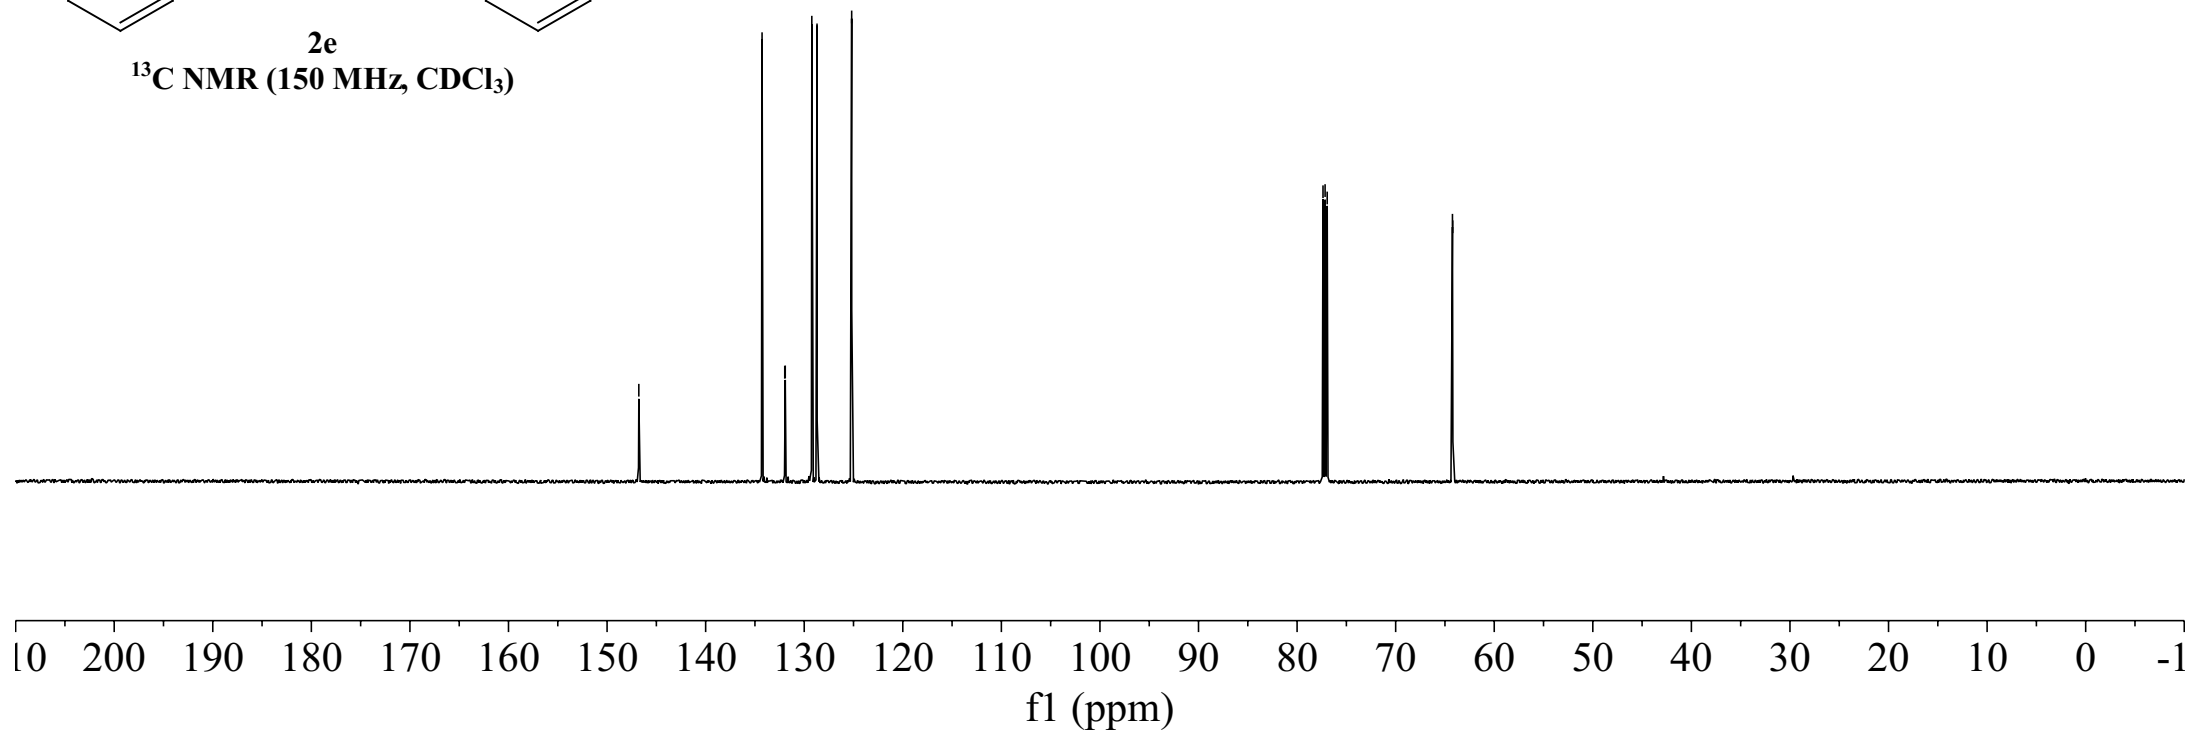



—8.141

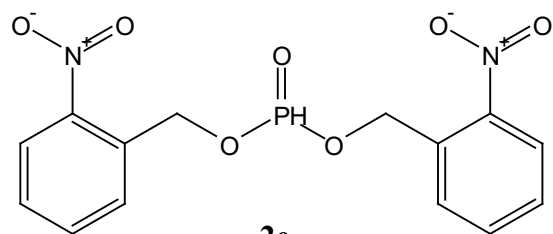

2e

<sup>31</sup>P NMR (162 MHz, CDCl<sub>3</sub>)

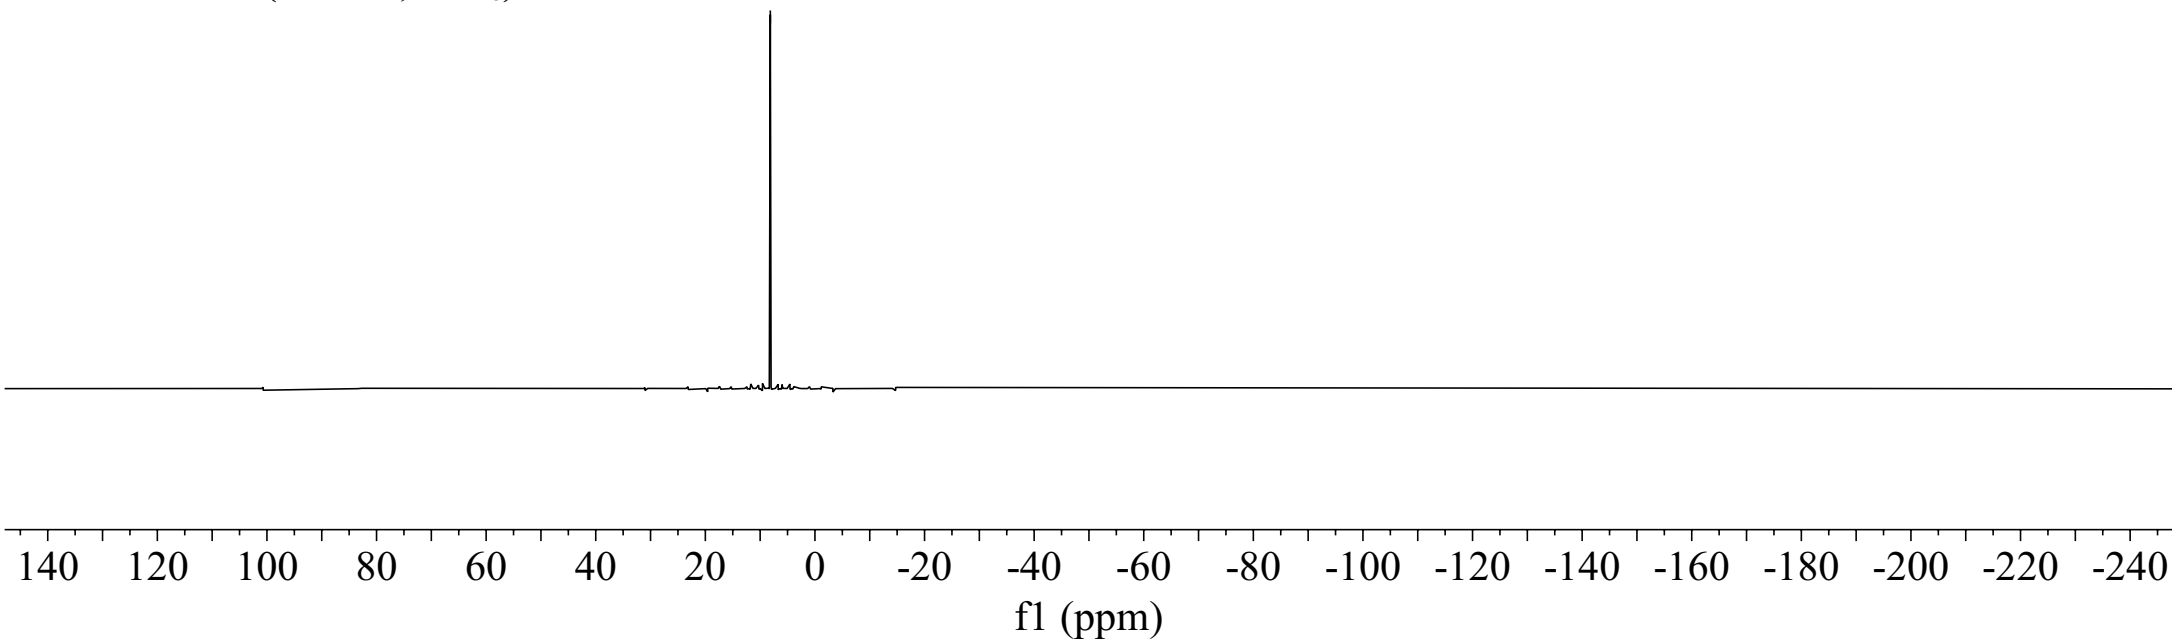

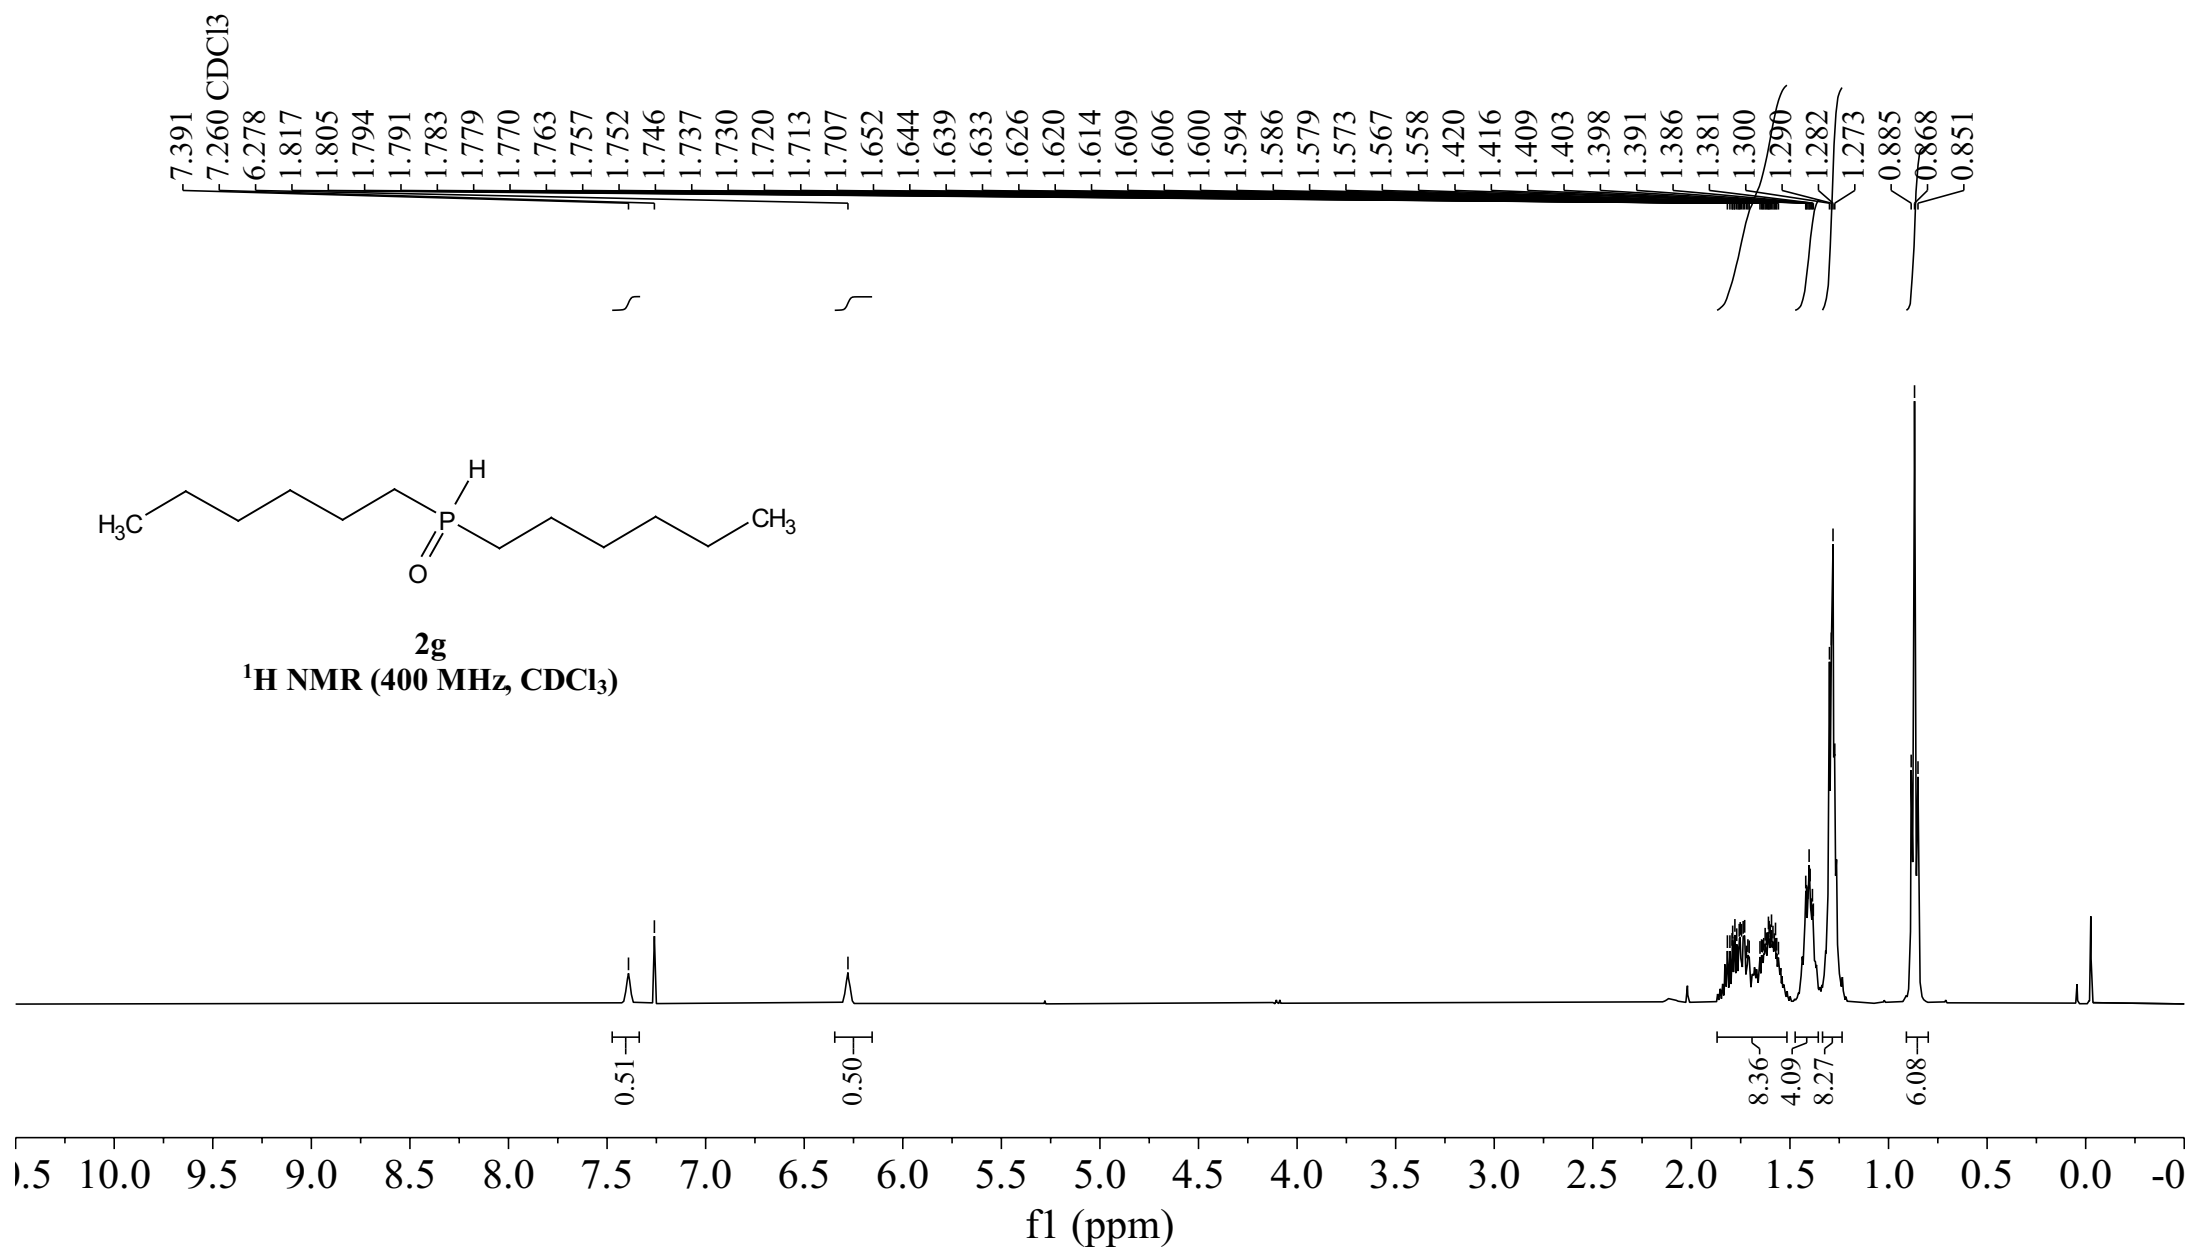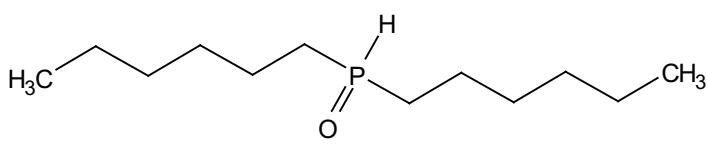

**2g**  
**<sup>1</sup>H NMR (400 MHz, CDCl<sub>3</sub>)**

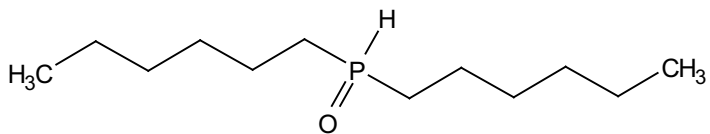

**2g**  
**<sup>13</sup>C NMR (100 MHz, CDCl<sub>3</sub>)**

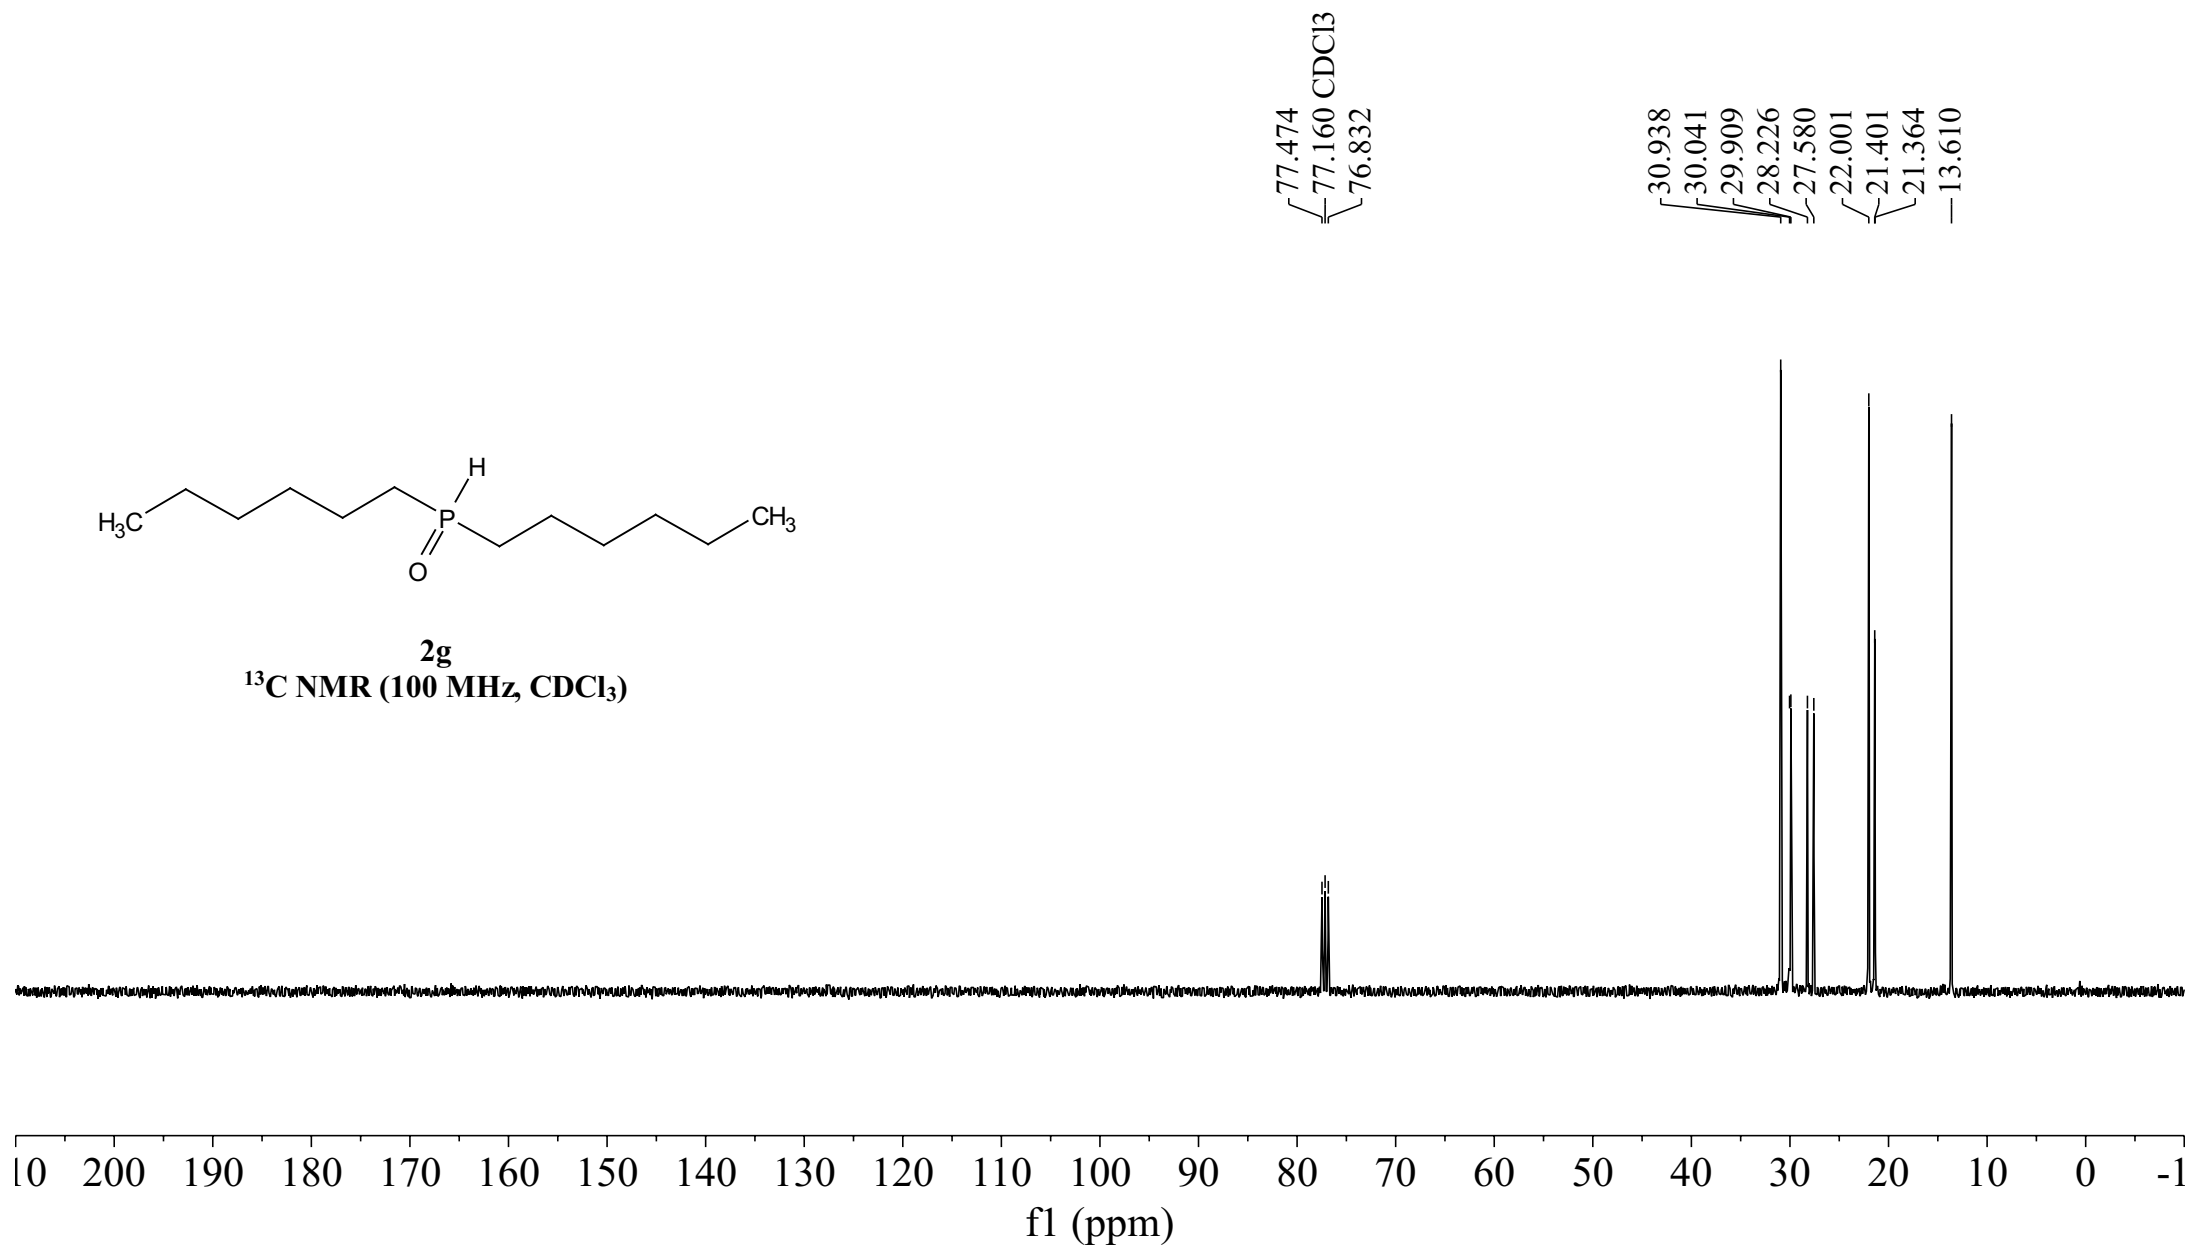

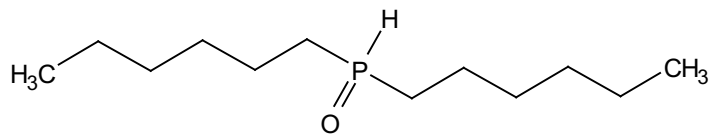

**2g**  
**<sup>31</sup>P NMR (162 MHz, CDCl<sub>3</sub>)**

—34.592

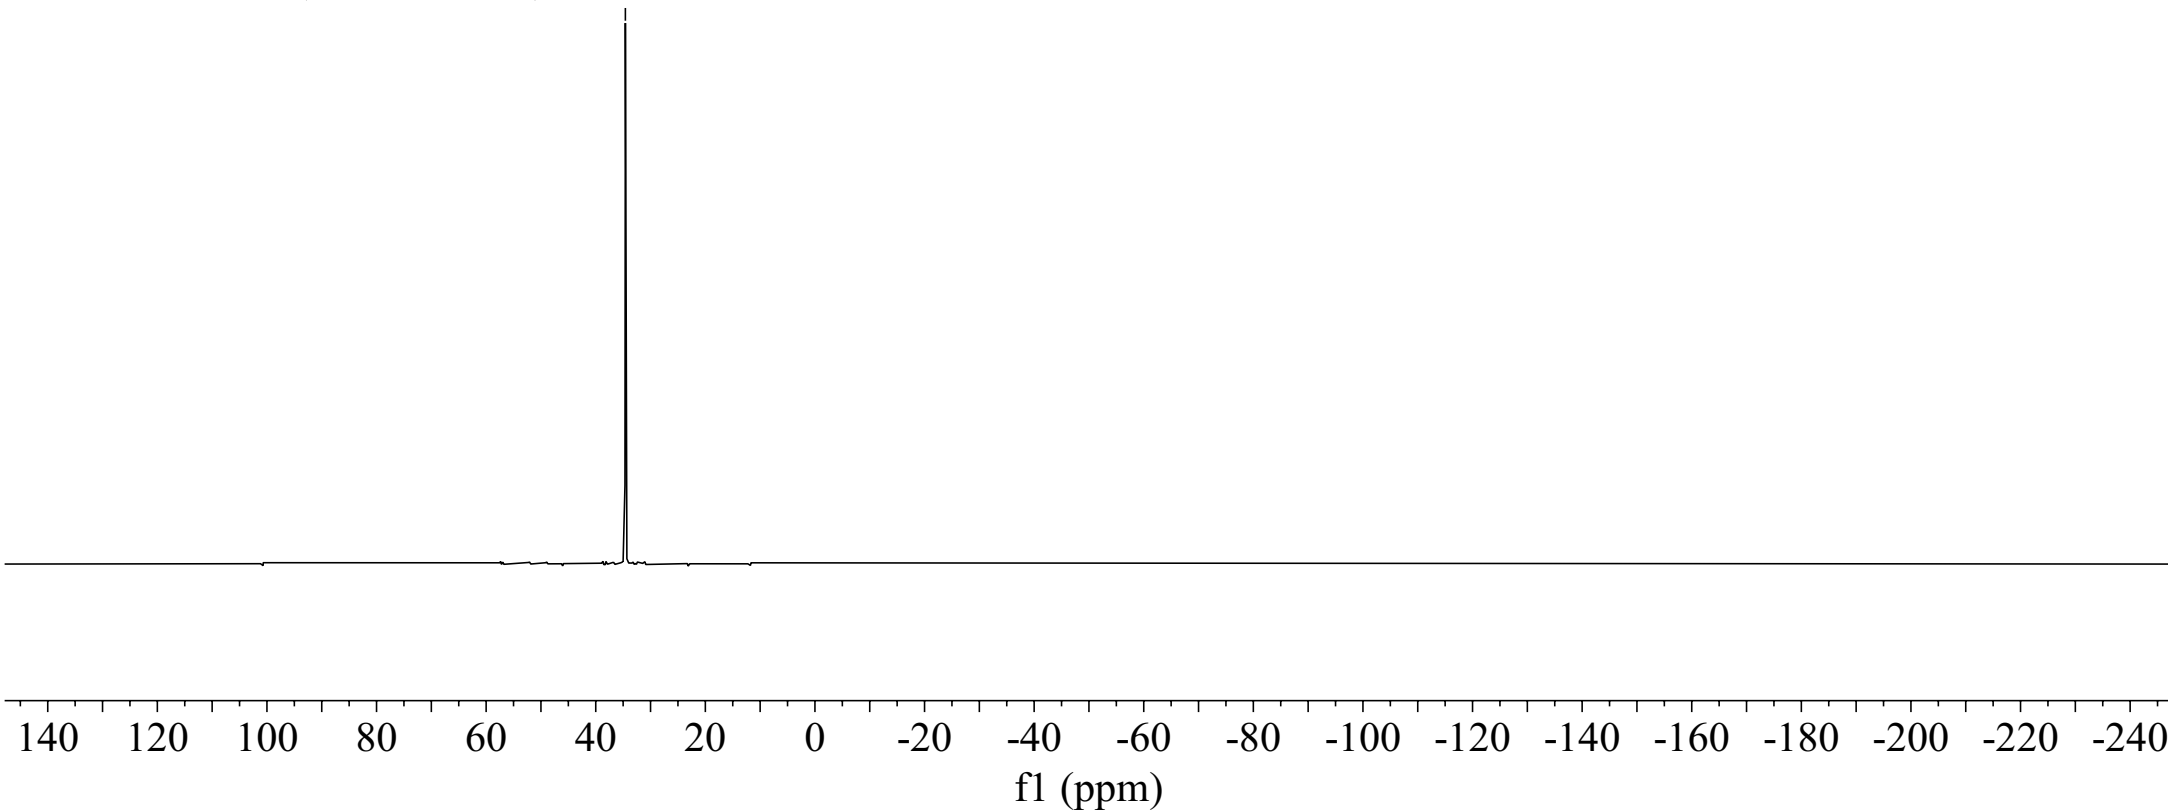

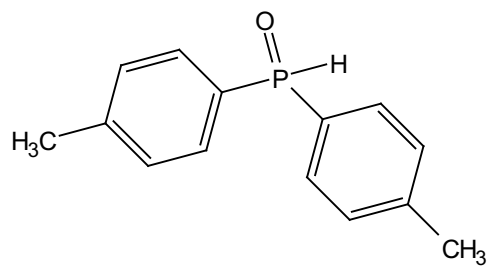

**2k**  
**<sup>1</sup>H NMR (400 MHz, CDCl<sub>3</sub>)**

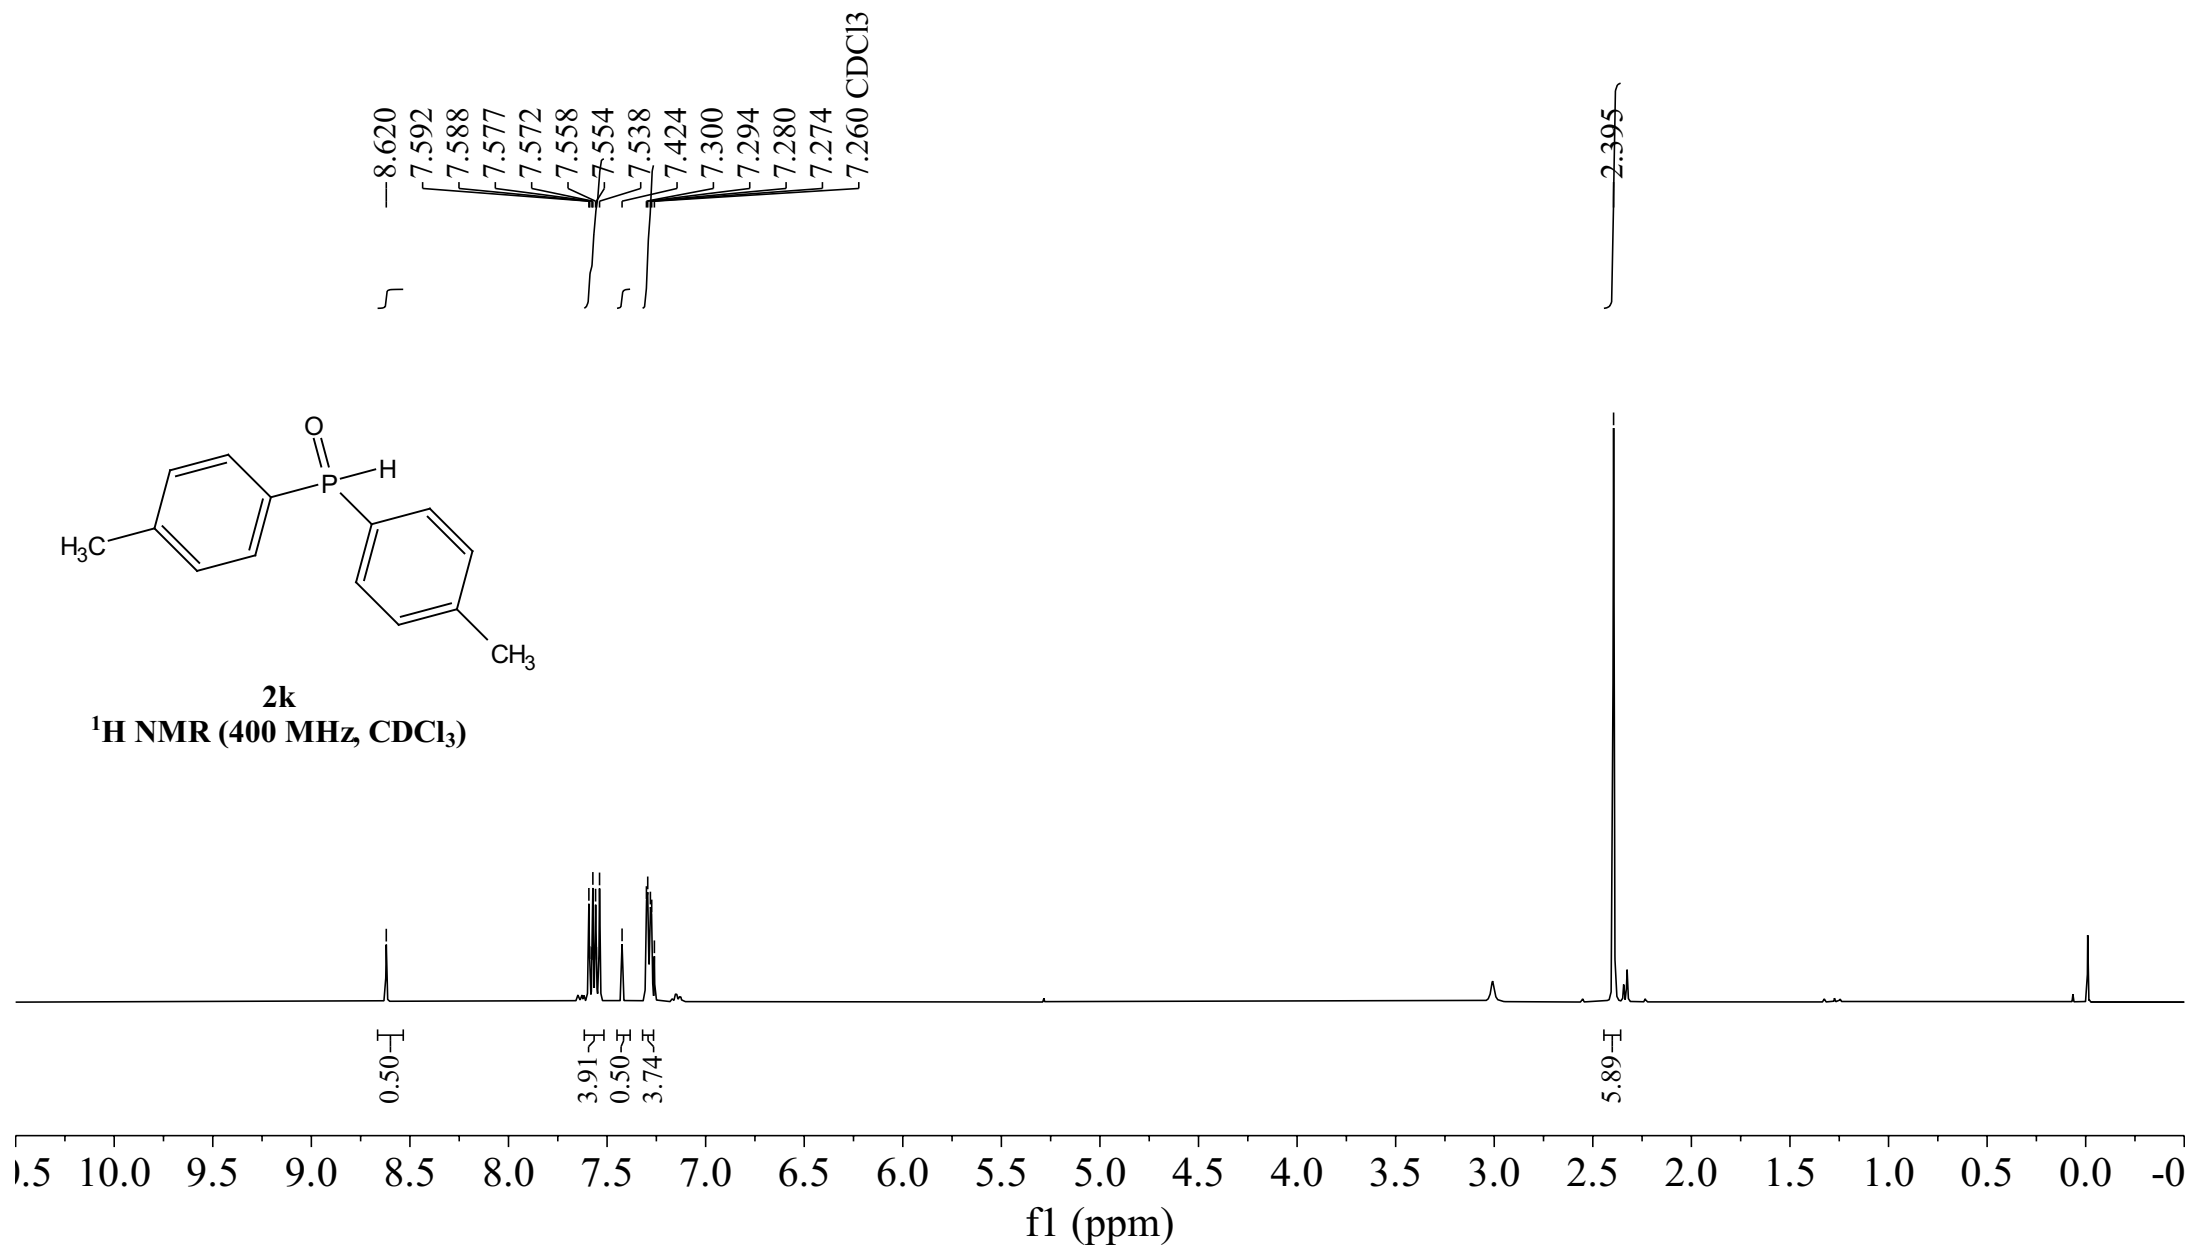

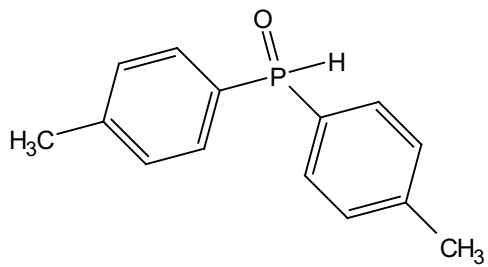

**2k**  
**<sup>13</sup>C NMR (100 MHz, CDCl<sub>3</sub>)**

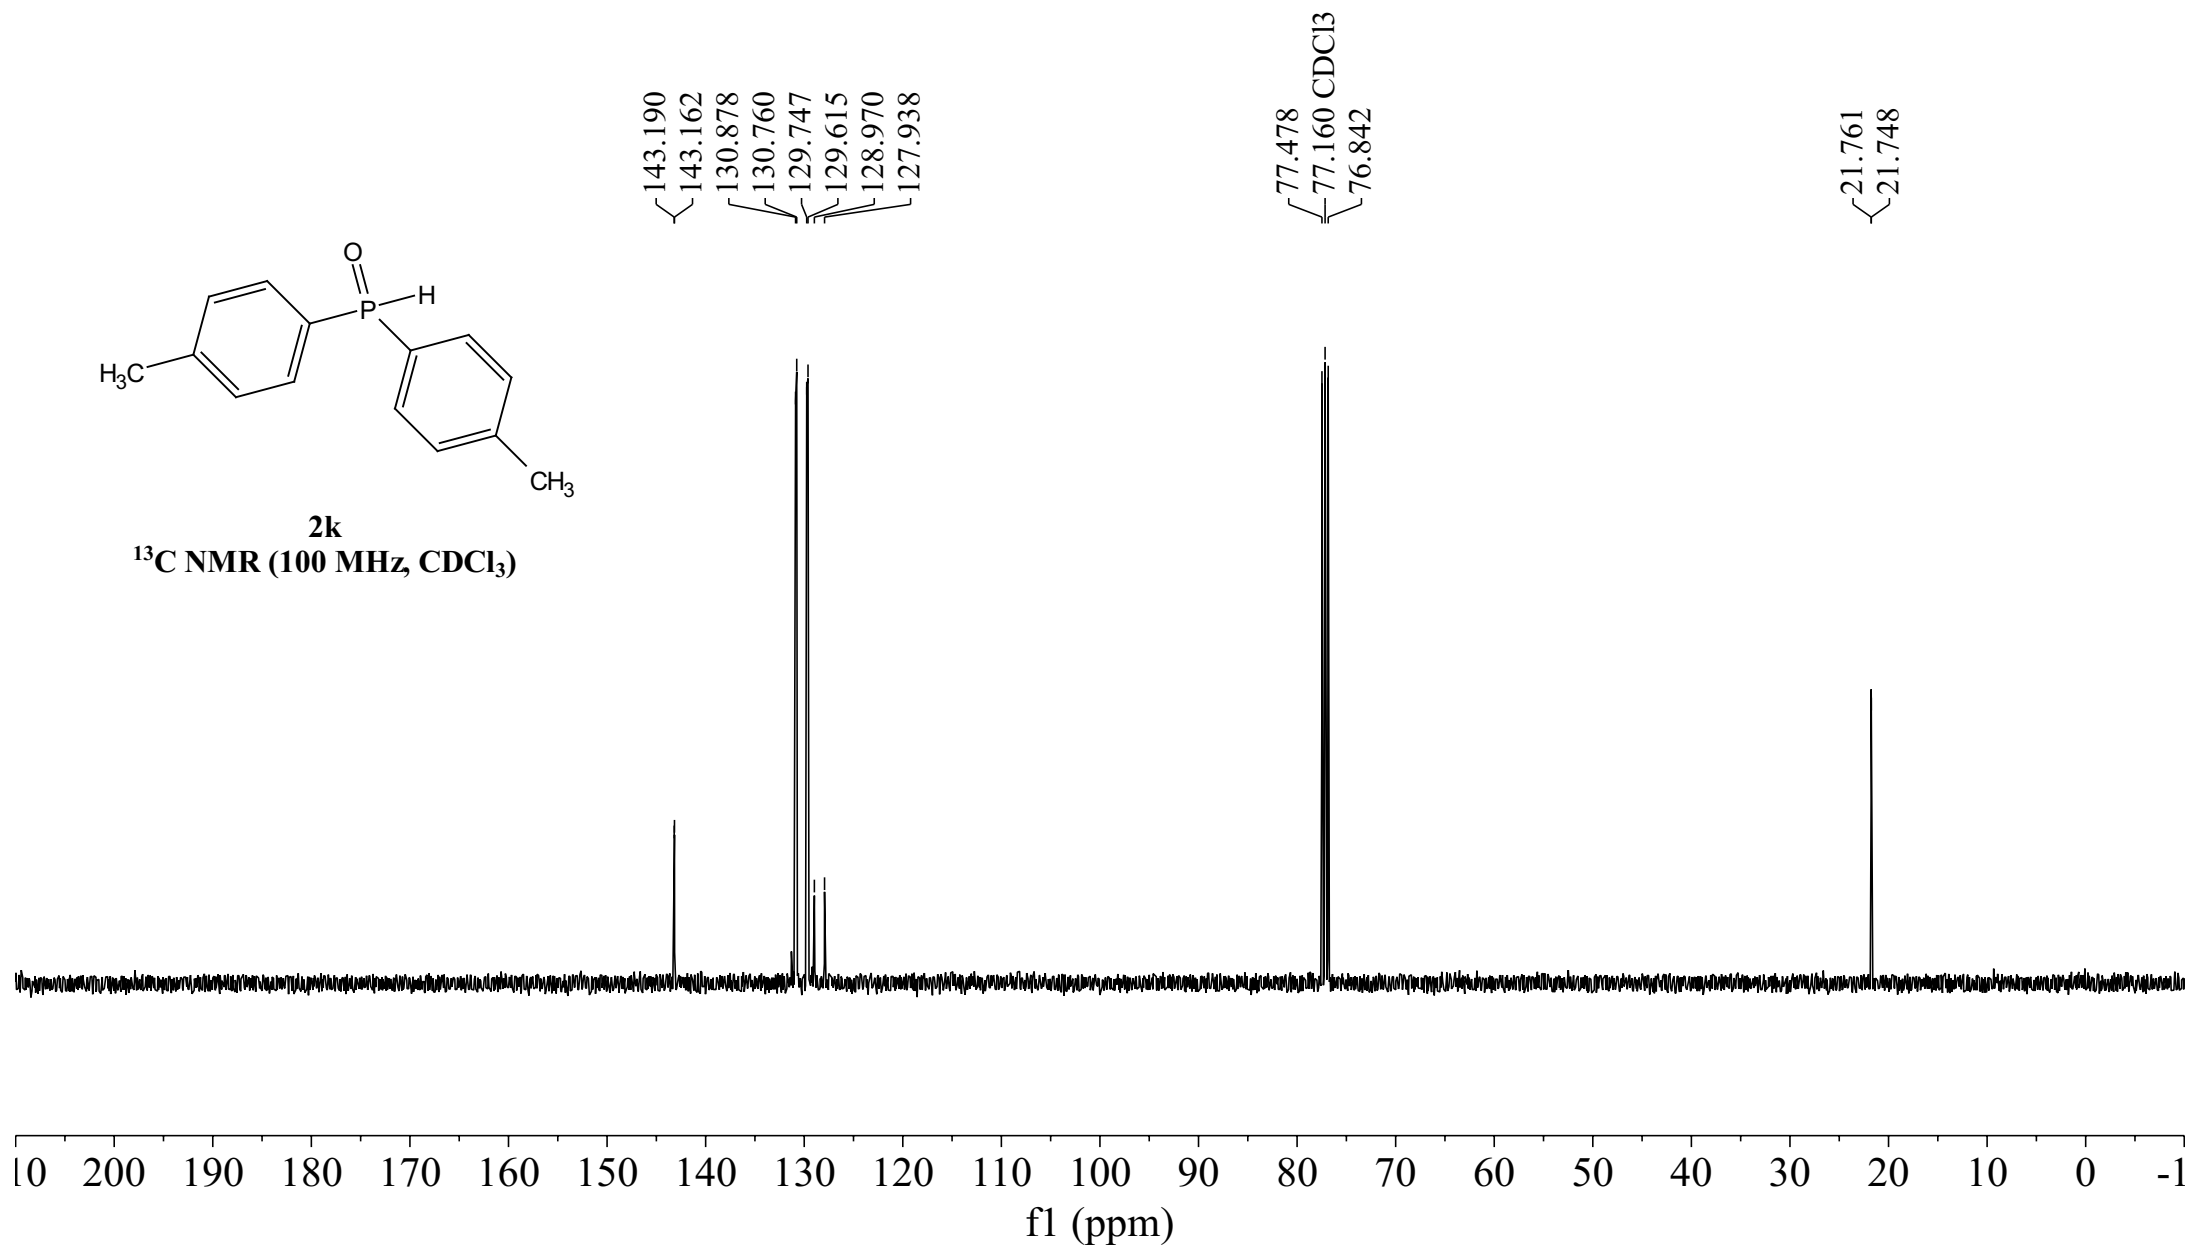

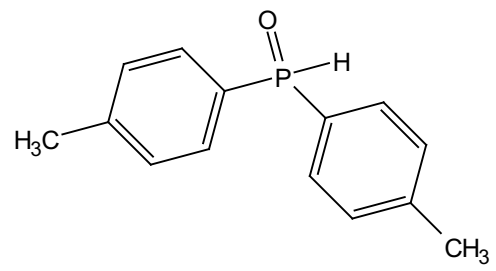

**2k**  
**<sup>31</sup>P NMR (162 MHz, CDCl<sub>3</sub>)**

—21.741

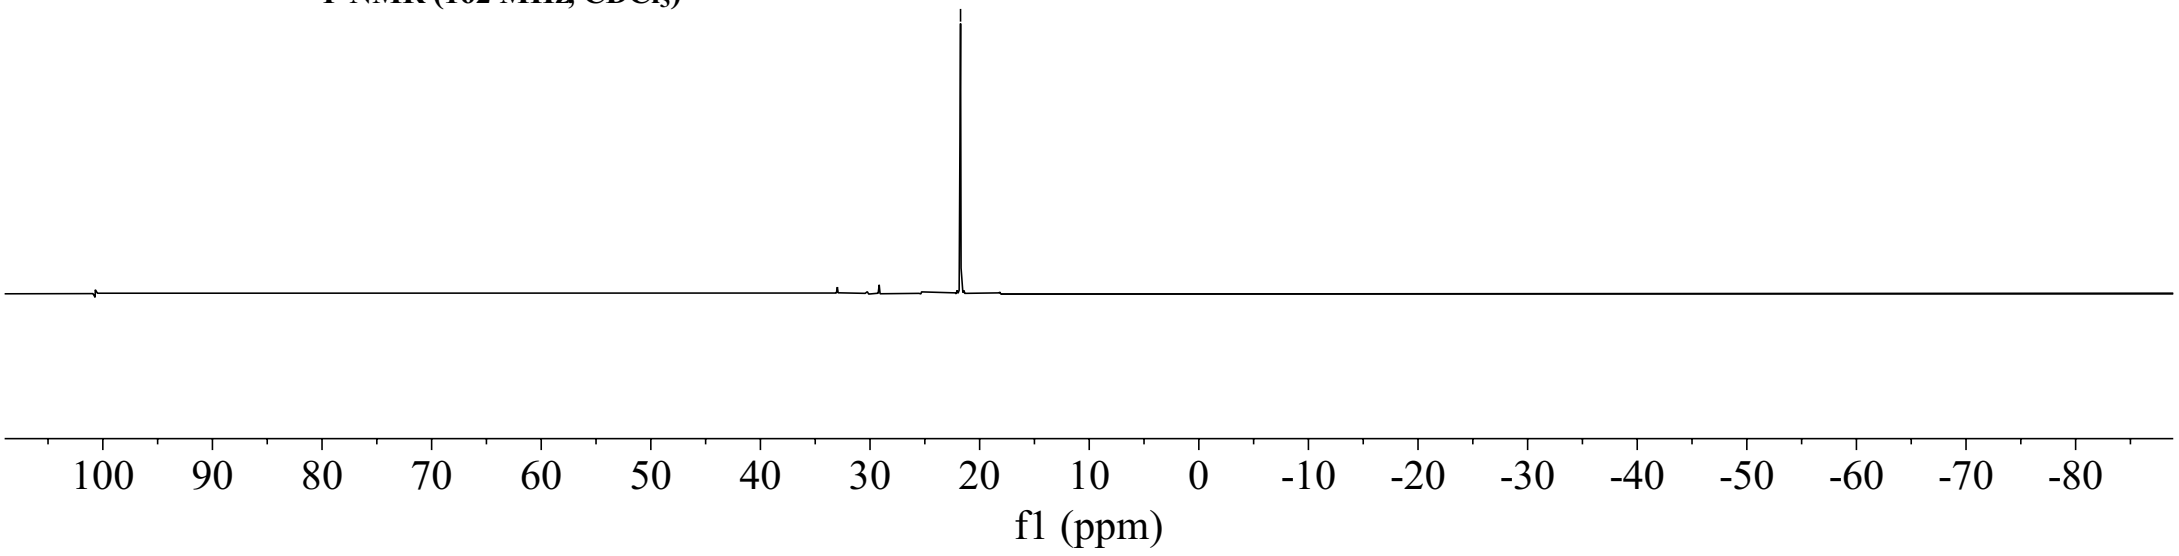

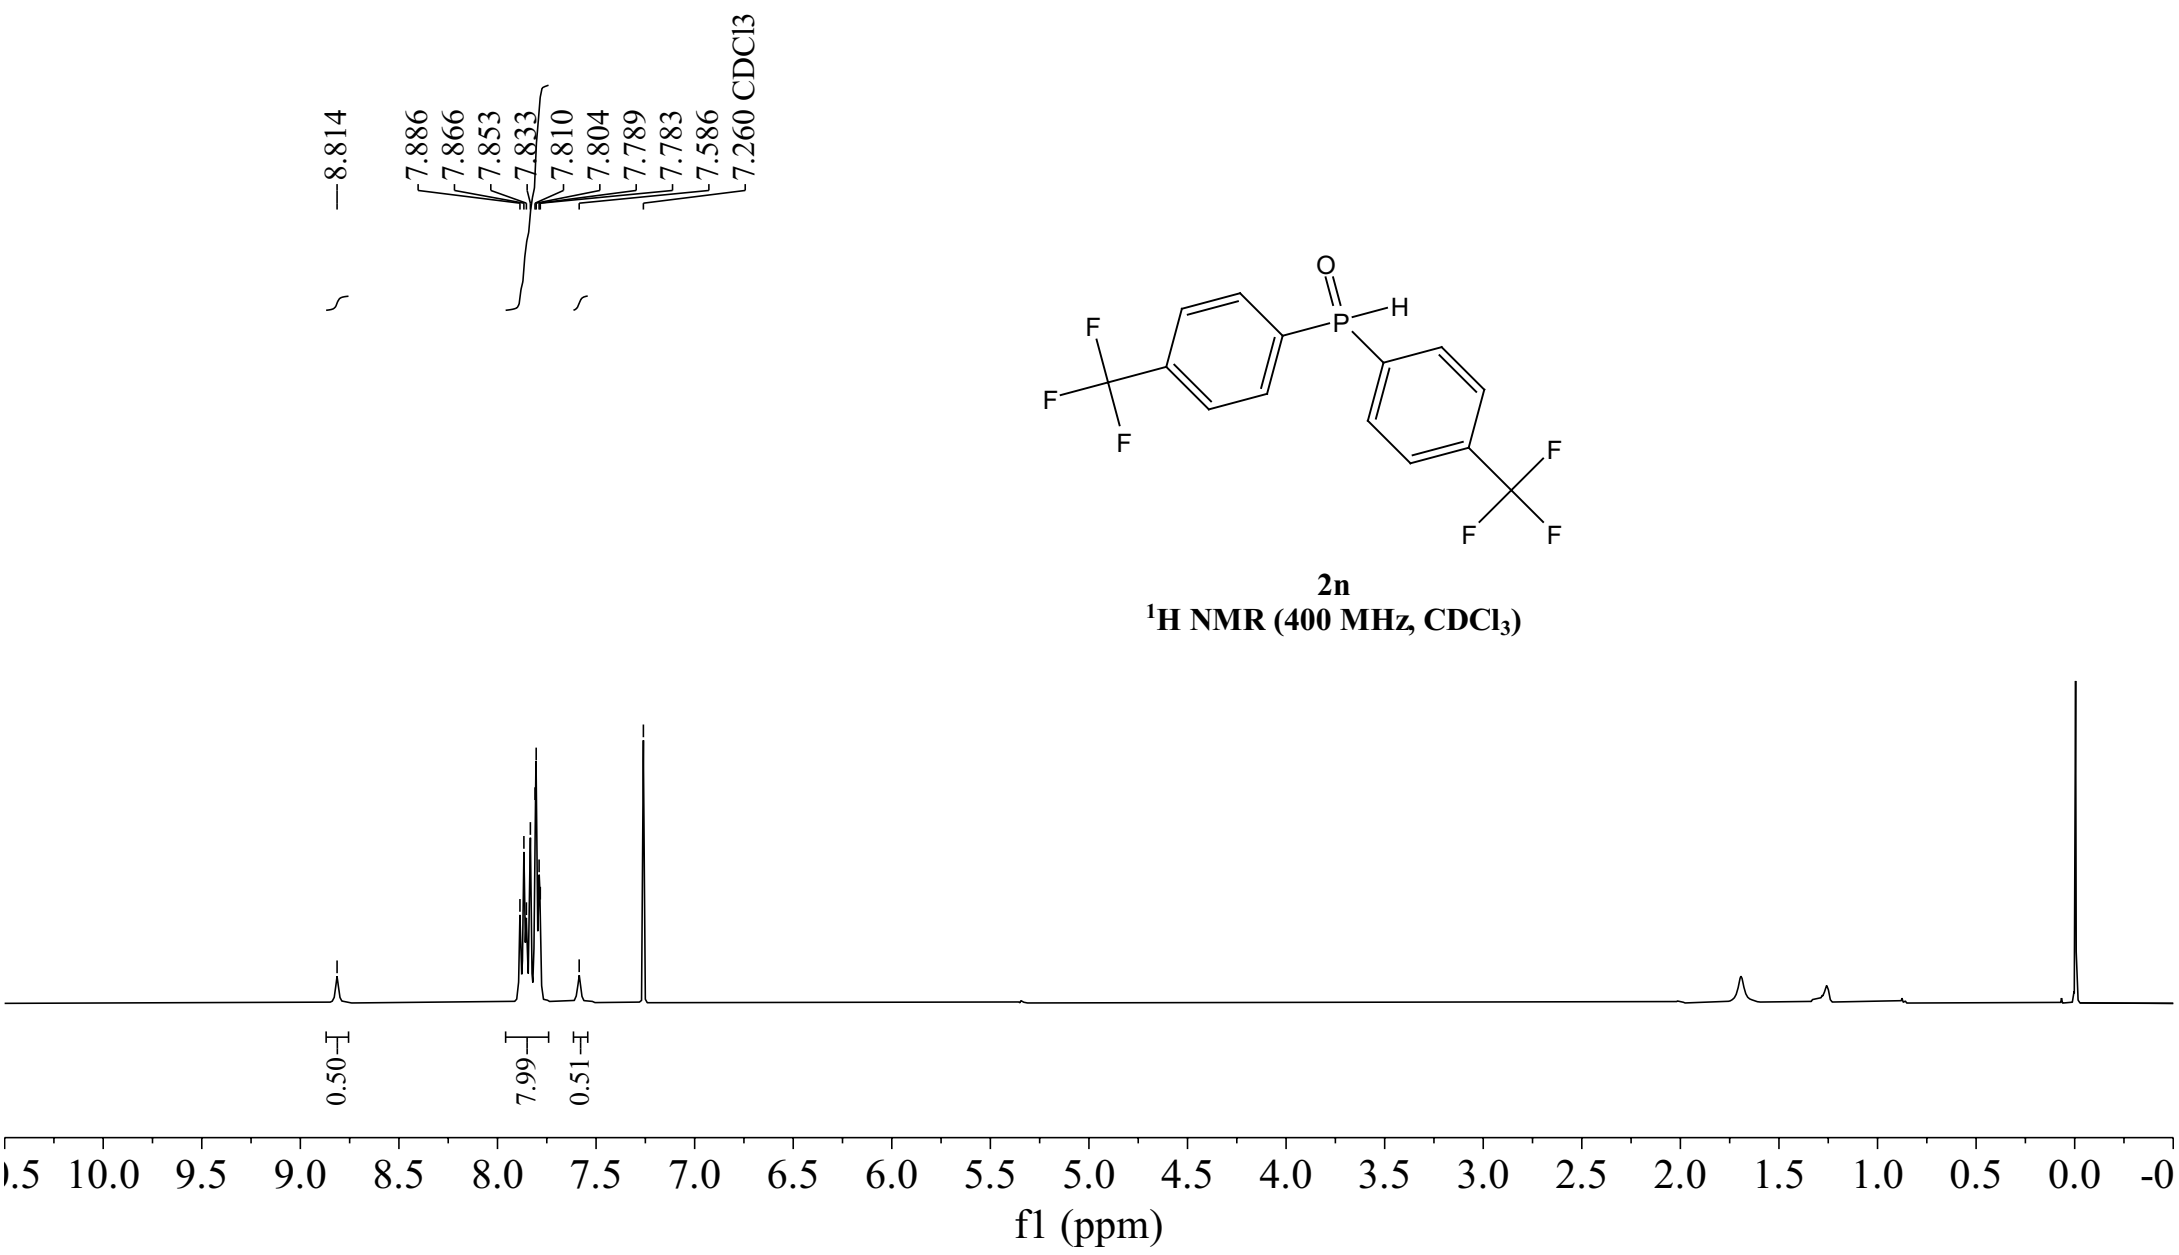



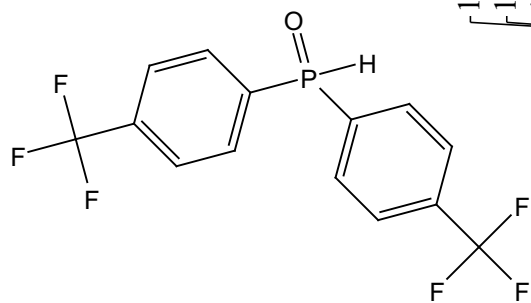

**2n**

**$^{13}\text{C}$  NMR (100 MHz,  $\text{CDCl}_3$ )**

135.412  
135.029  
134.704  
134.420  
131.325  
131.206  
127.457  
126.212  
126.181  
126.144  
126.095  
126.051  
126.014  
125.977  
124.743  
122.033  
119.320

77.477  
77.160  $\text{CDCl}_3$   
76.841

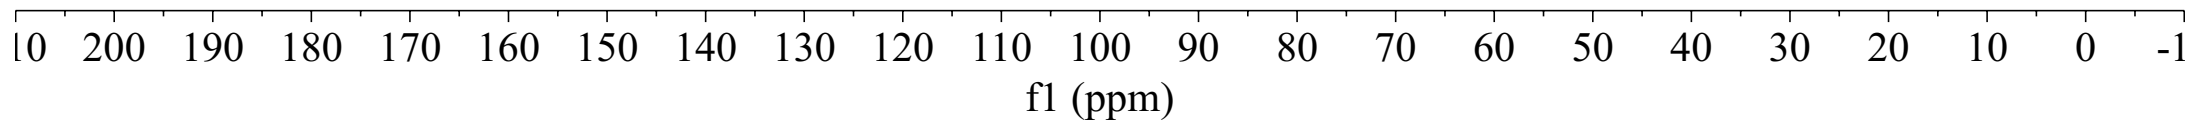

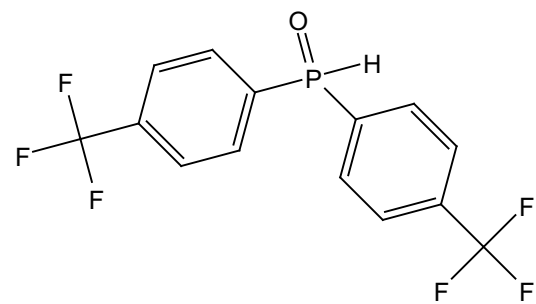

**2n**  
**<sup>31</sup>P NMR (162 MHz, CDCl<sub>3</sub>)**

—17.876

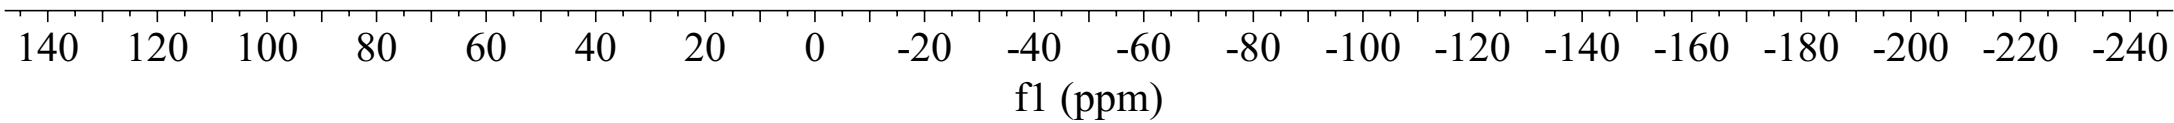

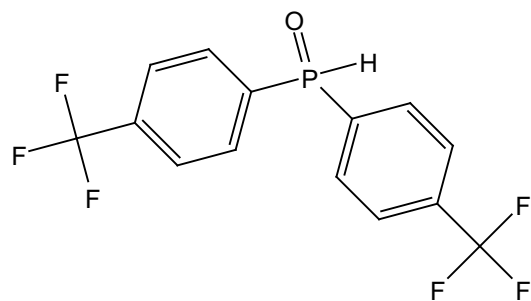

**2n**  
**<sup>19</sup>F NMR (376 MHz, CDCl<sub>3</sub>)**

— -63.344

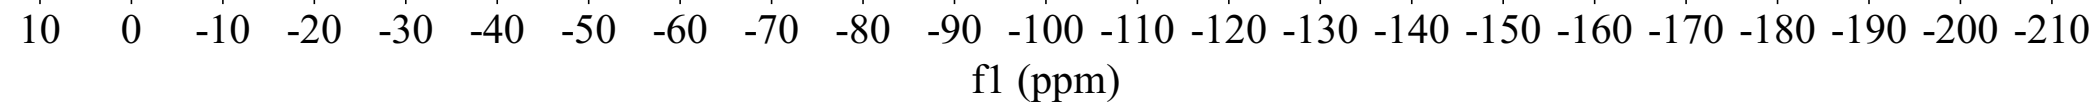

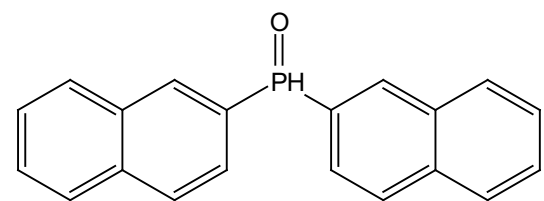

**20**

<sup>1</sup>H NMR (400 MHz, CDCl<sub>3</sub>)

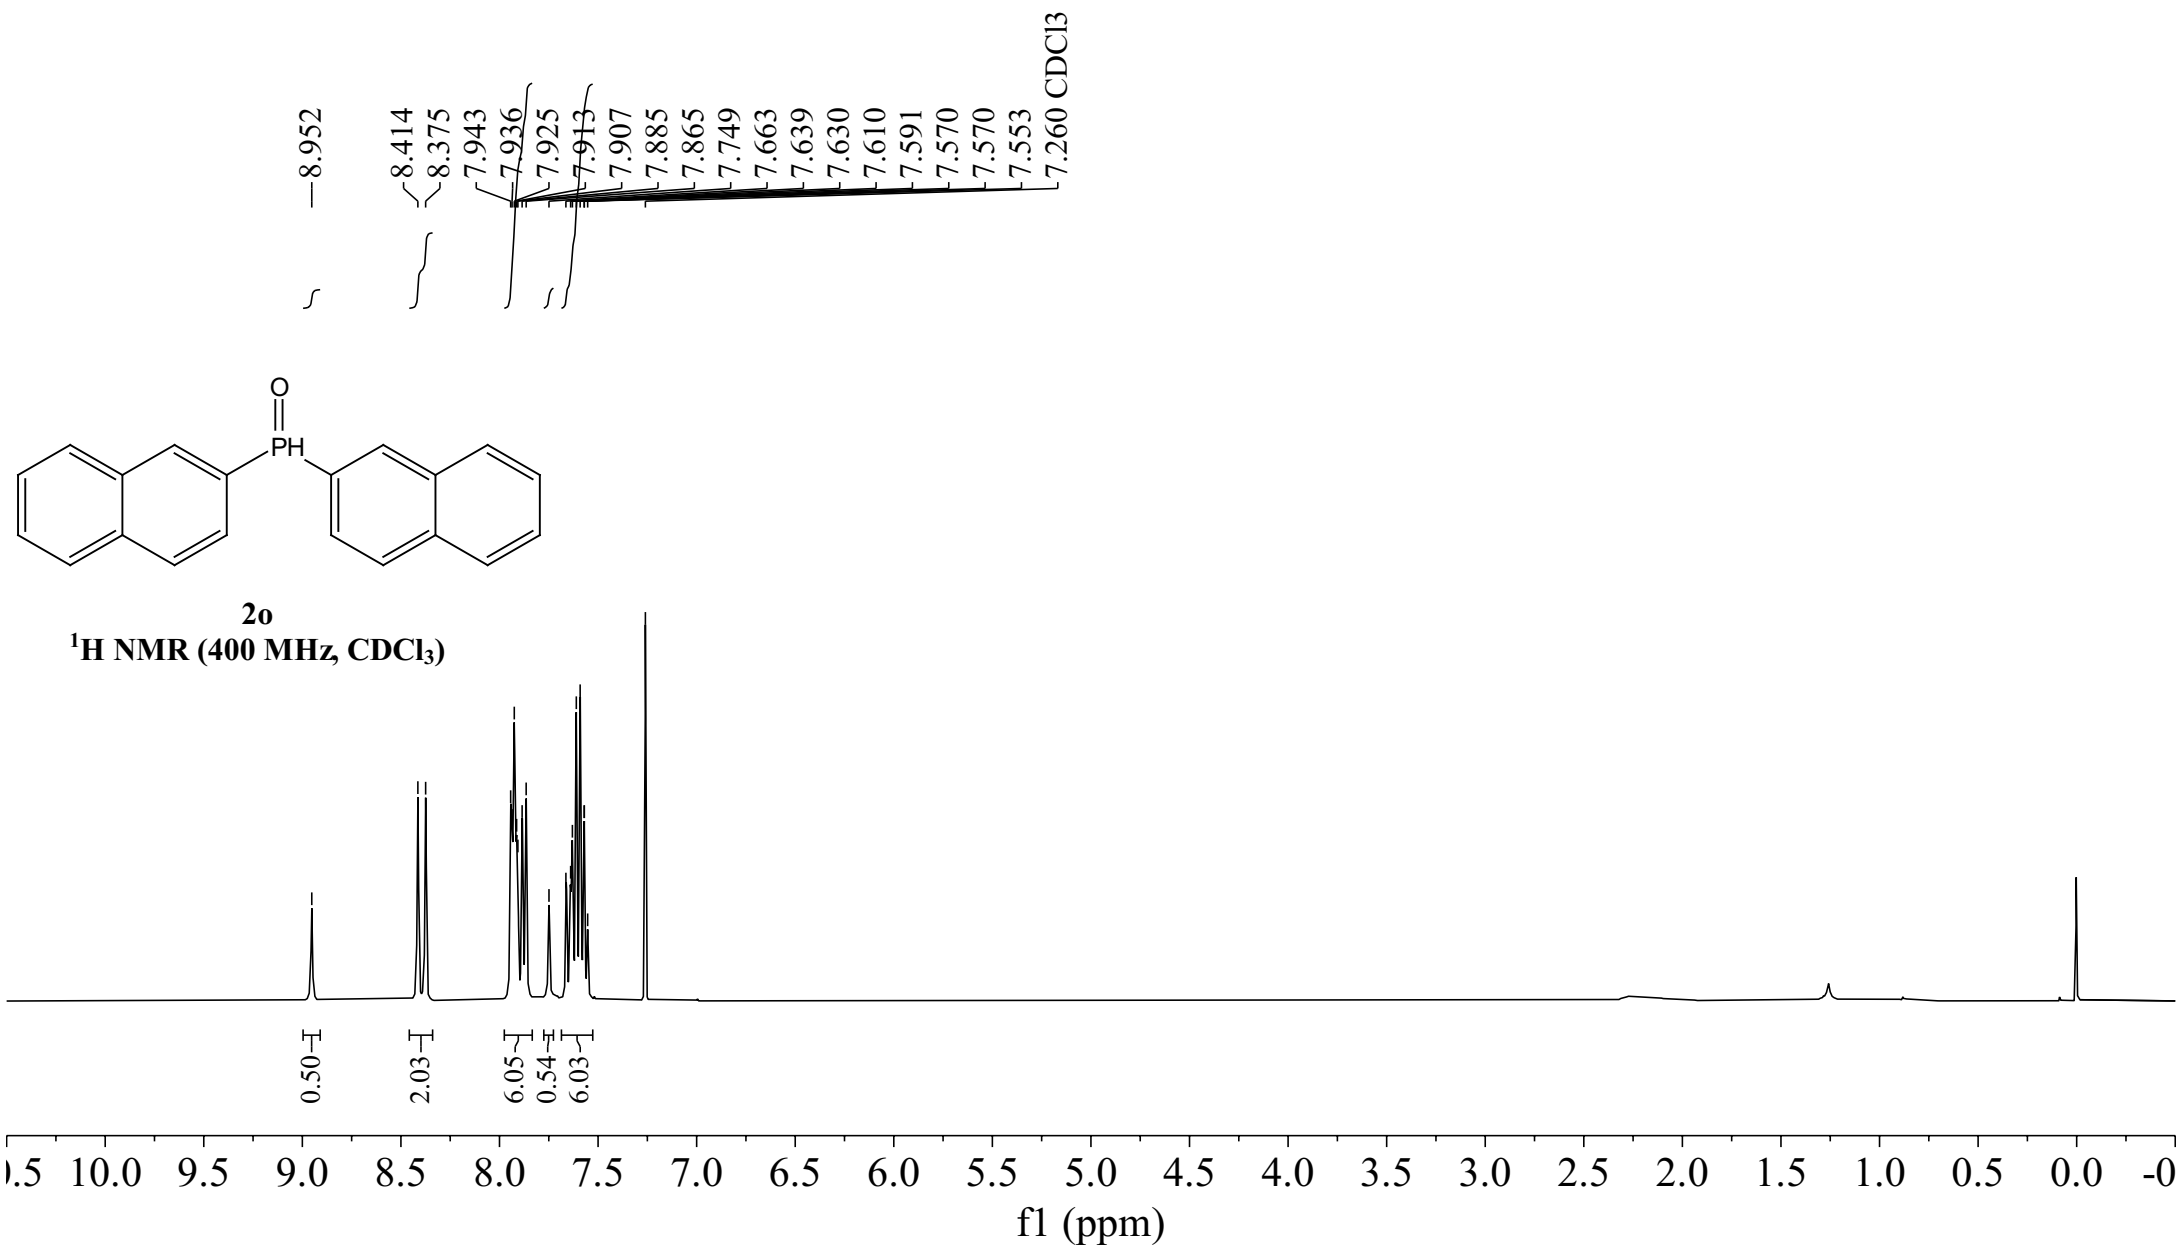

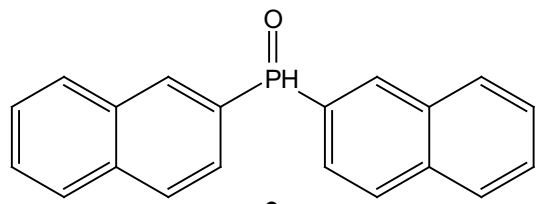

2o

<sup>13</sup>C NMR (100 MHz, CDCl<sub>3</sub>)

135.211  
135.186  
133.089  
132.980  
132.714  
132.573  
129.103  
128.977  
128.948  
128.573  
128.076  
127.289  
125.330  
125.206

77.479  
77.160 CDCl<sub>3</sub>  
76.843

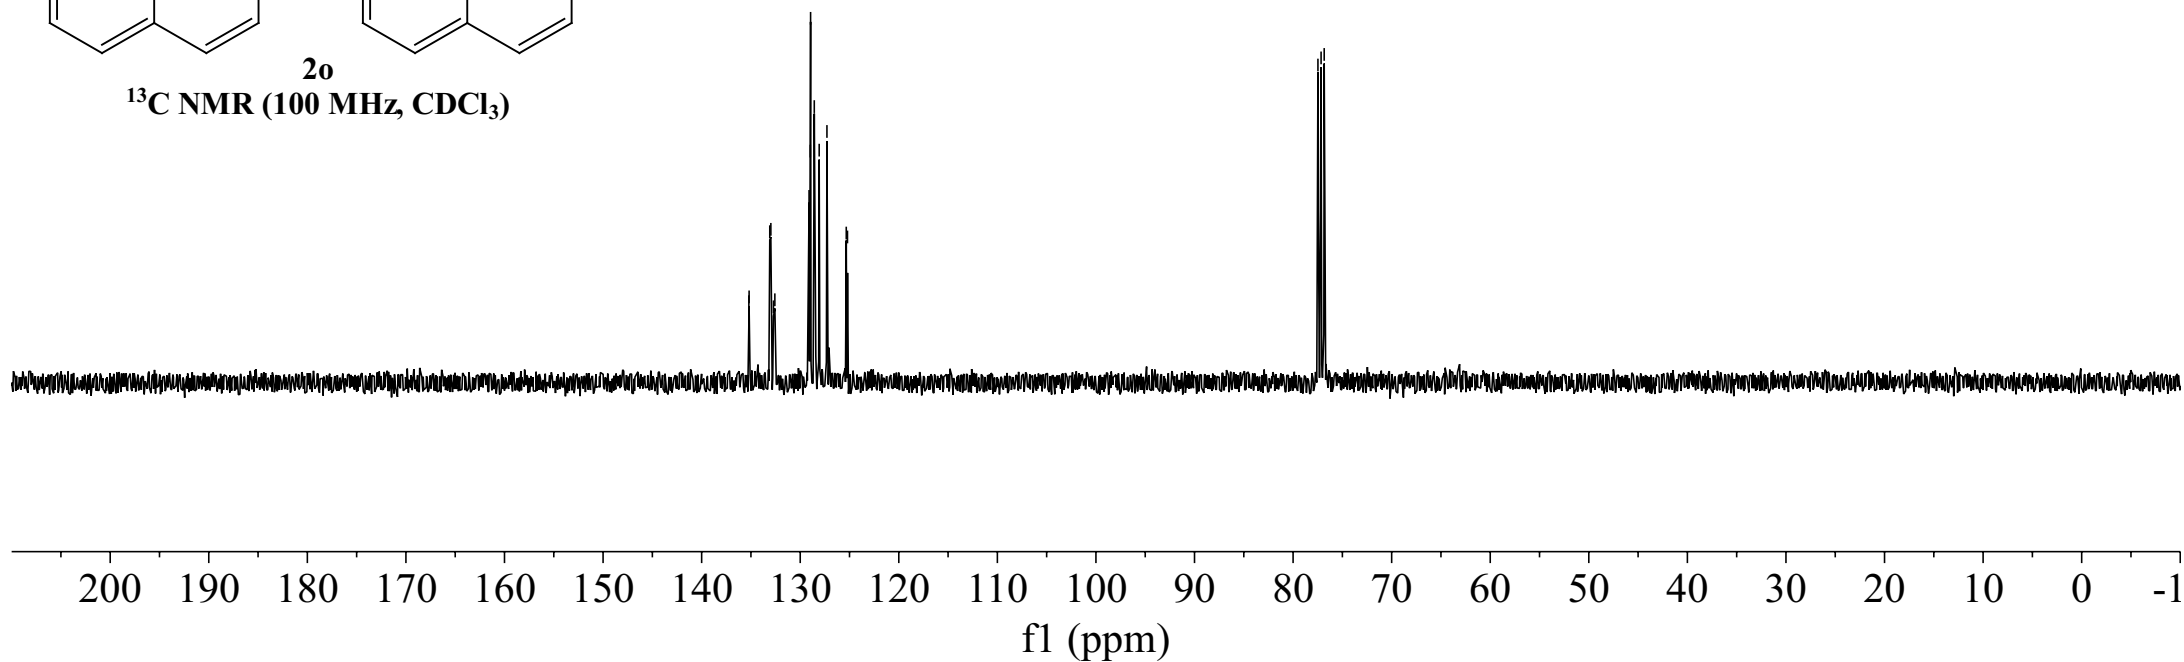

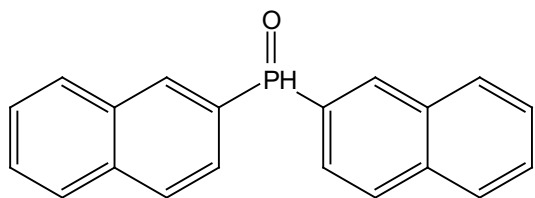

**2o**

**<sup>31</sup>P NMR (162 MHz, CDCl<sub>3</sub>)**

-21.737

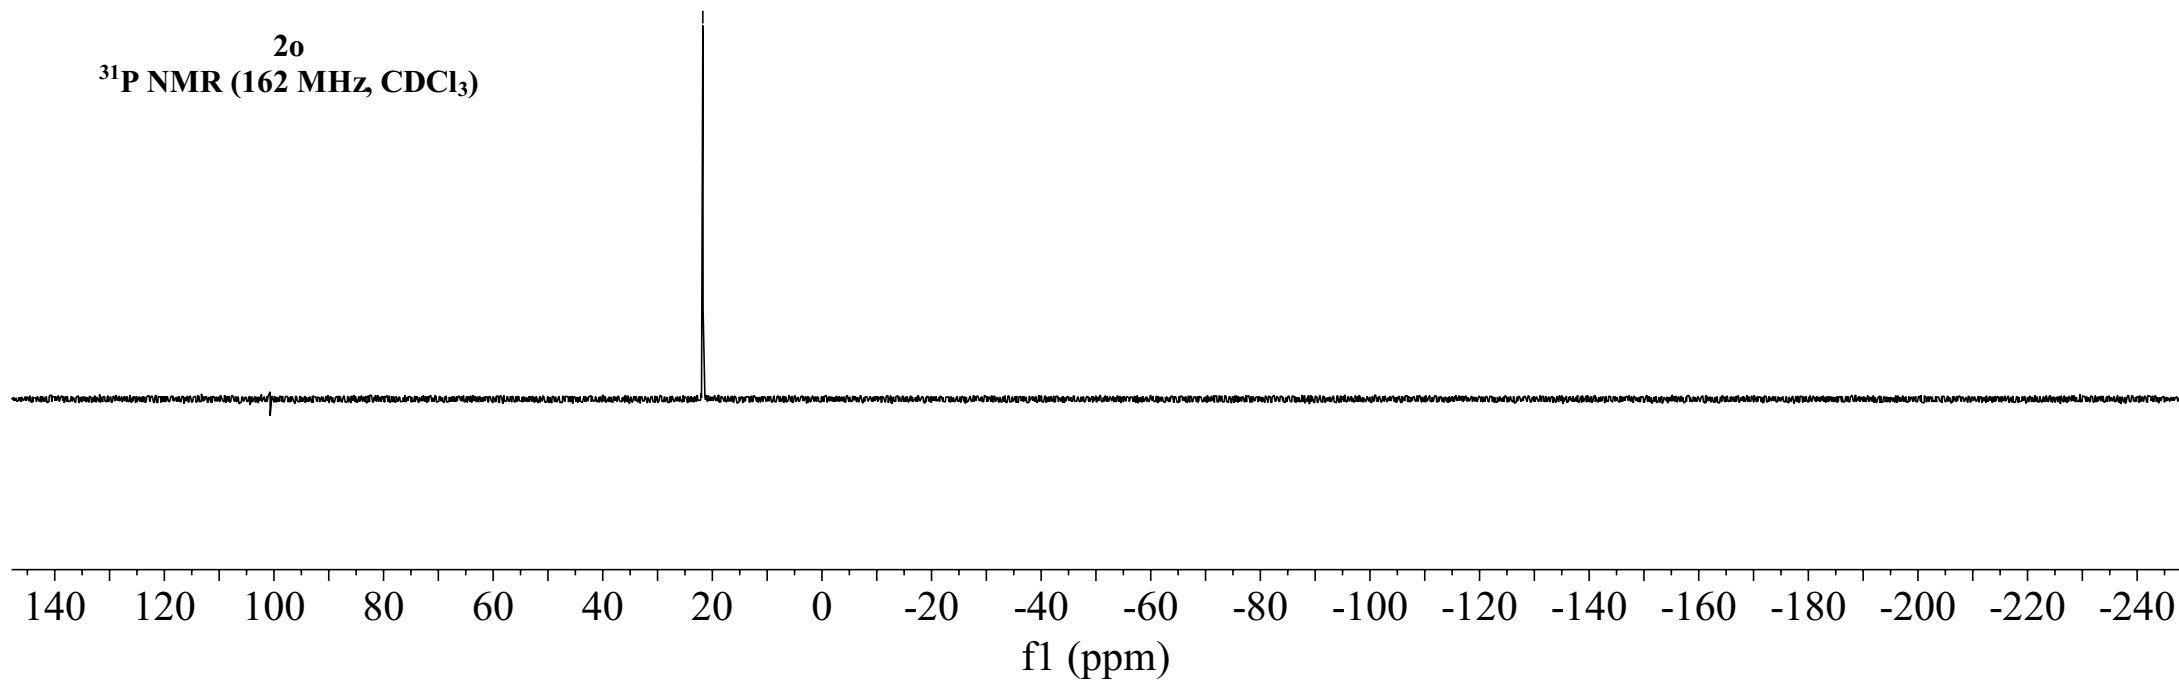

Supplement: d3ob00211j1.pdf [file d3ob00211j1.pdf]
